# Supplementary material for: P3H4 Overexpression Serves as a Prognostic Factor in Lung Adenocarcinoma
Source: Hindawi journal article supplement (doi:10.1155/2021/9971353), 2021-06-23
Supplement: f1 [file 9971353.f1.pdf]

| gene                | pvalue   | log2FoldCl | padj     |
|---------------------|----------|------------|----------|
| IGLV4-69            | 0.299797 | 1.083581   | 0.602797 |
| IGLV8-61            | 0.970476 | -0.41099   | 0.997592 |
| IGLV4-60            | 0.546526 | 0.47421    | 0.778915 |
| IGLV10-54           | 0.421971 | 0.556096   | 0.691467 |
| IGLV7-46            | 0.893443 | -0.1612    | 0.967693 |
| IGLV5-37;IGLV5-52   | 0.291769 | 0.482756   | 0.595183 |
| IGLV2-18            | 0.500085 | 0.747559   | 0.74591  |
| IGLV3-12            | 0.594656 | -0.13647   | 0.806337 |
| IGLV3-10            | 0.336136 | -0.99725   | 0.623617 |
| IGLV3-9             | 0.35064  | 0.05375    | 0.635657 |
| IGKV2D-28           | 0.425261 | 0.664893   | 0.693599 |
| IGHV3-64            | 0.807504 | -0.22214   | 0.921159 |
| IGHV4-4             | 0.777334 | -0.34037   | 0.906372 |
| IGKV2D-29;IGKV2D-26 | 0.175647 | -1.27344   | 0.46717  |
| IGKV1-27            | 0.394718 | 0.587275   | 0.672349 |
| IGLV5-45            | 0.09703  | 1.424561   | 0.354489 |
| IGKV3D-15           | 0.07985  | 1.6346     | 0.325919 |
| IGKV1D-8            | 0.976419 | 0.027518   | 0.998921 |
| TMEM265             | 0.661071 | 0.241823   | 0.844596 |
| IGKV2-40            | 0.405867 | 1.14474    | 0.680084 |
| MGC50722            | 0.993518 | -0.02343   | 1        |
| IGHV1-45            | 0.125999 | 1.168751   | 0.403148 |
| IGHV3-49            | 0.42656  | 0.307003   | 0.693599 |
| IGKV6D-21           | 0.39952  | 0.818149   | 0.67622  |
| IGLV1-36            | 1        | -0.13283   | 1        |
| IGHV6-1             | 0.205339 | 0.745804   | 0.49957  |
| IGHV3-15            | 0.674379 | -0.42597   | 0.853175 |
| IGHV2-26            | 0.549247 | 0.608279   | 0.781327 |
| IGHV3-73            | 0.25401  | 0.93626    | 0.557593 |
| IGHV3-74            | 0.488796 | 0.522654   | 0.738656 |
| IGHV3-43            | 0.550402 | -0.48894   | 0.781327 |
| IGLV9-49            | 0.933301 | -0.1332    | 0.984157 |
| IGHV3-72            | 0.34427  | -0.95649   | 0.630561 |
| PIGBOS1             | 0.078866 | -2.66723   | 0.32578  |
| IGHV1-69-2          | 0.310183 | 0.352186   | 0.609864 |
| IGKV6-21            | 0.421207 | -0.34783   | 0.691066 |
| IGKV3D-20           | 0.525205 | 0.821965   | 0.764479 |
| IGHV1-3             | 0.197877 | 1.155886   | 0.491413 |
| IGHV1-18            | 0.268217 | 1.142603   | 0.570868 |
| IGHV3-20            | 0.508688 | 0.21031    | 0.752448 |
| IGHV1-24            | 0.310396 | 0.797754   | 0.609894 |
| IGHV4-28            | 0.36079  | 1.322977   | 0.644411 |
| IGHV5-51            | 0.57727  | -0.47729   | 0.796634 |
| IGHV1-58            | 0.626197 | 0.252646   | 0.828579 |
| IGHV2-70D           | 0.798306 | -0.17902   | 0.916091 |
| IGKV1-8;IGKV1-9     | 0.282704 | 0.722061   | 0.585849 |
| IGKV2-24            | 0.794066 | -0.09637   | 0.913708 |
| IGKV1-6             | 0.887219 | -0.10956   | 0.96416  |
| IGHV1-69-2          | 0.556057 | 0.179569   | 0.783439 |
| IGLV5-39            | 0.693787 | 0.285096   | 0.861478 |
| IGHV7-4-1           | 0.819598 | -0.0726    | 0.92687  |
| IGHV3-64D           | 0.121951 | 1.393081   | 0.397343 |
| PNMA6E              | 0.041397 | 0.564903   | 0.240826 |
| IGHV5-10-1          | 0.094648 | -1.50382   | 0.350381 |
| MMP24OS             | 0.170868 | -1.37417   | 0.461822 |
| CSNKA2IP            | 0.128633 | -0.54511   | 0.408202 |
| PRRT1B              | 0.988991 | 0.02042    | 1        |

|           |          |          |          |
|-----------|----------|----------|----------|
| SLC12A8   | 0.253685 | 0.236165 | 0.557407 |
| RBM47     | 0.226131 | -0.21121 | 0.525131 |
| TTC26     | 0.752138 | 0.138952 | 0.893334 |
| TMEM129   | 0.841169 | -0.10194 | 0.939802 |
| UBA6      | 0.019715 | 0.406901 | 0.1684   |
| ESYT2     | 0.09193  | 0.212712 | 0.345626 |
| ESYT3     | 0.344404 | -0.23079 | 0.630639 |
| MED19     | 0.148163 | 1.181937 | 0.437508 |
| UHRF1BP1L | 0.086585 | 0.987944 | 0.337307 |
| IGLC7     | 0.0483   | -1.72718 | 0.258042 |
| KIAA1598  | 0.709387 | 0.089624 | 0.869179 |
| TMEM223   | 0.116113 | 0.936421 | 0.38883  |
| GXYLT2    | 0.001668 | 1.83223  | 0.042235 |
| TMEM120B  | 0.69753  | -0.31481 | 0.863813 |
| ARHGAP10  | 0.709384 | 0.090154 | 0.869179 |
| ANO9      | 0.684743 | 0.157059 | 0.85709  |
| SLC22A23  | 0.298494 | 0.34649  | 0.601676 |
| CCDC64B   | 0.493883 | -0.45517 | 0.741997 |
| ARHGEF37  | 0.713801 | 0.135015 | 0.87164  |
| MEX3A     | 0.511124 | 0.286912 | 0.754376 |
| ILVBL     | 0.43056  | 0.132778 | 0.695651 |
| TSPAN11   | 0.96897  | -0.00285 | 0.997592 |
| C1orf226  | 0.465112 | 0.605008 | 0.721065 |
| C17orf89  | 0.635921 | -0.24693 | 0.833511 |
| PLEKHG3   | 0.512478 | 0.297214 | 0.755334 |
| ELOVL7    | 0.079566 | -1.07624 | 0.325919 |
| SSC5D     | 0.306214 | 0.259027 | 0.607661 |
| SH3PXD2B  | 6.45E-09 | 1.844608 | 3.40E-06 |
| FAM92A1   | 0.060633 | 0.787108 | 0.287262 |
| MACROD2   | 0.980555 | -0.11765 | 1        |
| ZC3H12D   | 0.38755  | 0.437779 | 0.666378 |
| FRMD3     |          | 0        |          |
| CXorf23   | 0.529495 | 0.20692  | 0.768066 |
| IGKV A18  | 0.051749 | 0.822481 | 0.266457 |
| NBAS      | 0.528742 | 0.07462  | 0.767576 |
| TARSL2    | 0.502916 | -0.24555 | 0.747596 |
| SMCO3     | 0.452579 | 0.362391 | 0.712397 |
| KIAA1467  | 0.869166 | 0.080666 | 0.955488 |
| TYW5      | 0.103724 | 0.745939 | 0.366863 |
| DENND3    | 0.934082 | 0.077617 | 0.984157 |
| FUOM      | 0.494892 | -0.31997 | 0.742037 |
| KIAA0922  | 0.208518 | 0.514418 | 0.503054 |
| VWA8      | 0.641914 | -0.14472 | 0.835764 |
| SBNO1     | 0.769114 | -0.17403 | 0.901915 |
| ISPD      | 0.538387 | -0.27776 | 0.774281 |
| FAM221A   | 0.380925 | -0.49771 | 0.661698 |
| GSAP      | 0.608713 | 0.018681 | 0.816529 |
| GTPBP10   | 0.845683 | 0.114184 | 0.942239 |
| WDR91     | 0.794443 | 0.029339 | 0.913708 |
| KLRG2     | 0.648995 | 0.173108 | 0.839222 |
| RAB19     | 0.648077 | -0.53159 | 0.838523 |
| LCHN      | 0.908605 | -0.10424 | 0.973845 |
| MBLAC1    | 0.74145  | 0.069305 | 0.887483 |
| SH3D21    | 0.881851 | 0.056157 | 0.961515 |
| EFCAB5    | 0.501113 | 0.400806 | 0.74652  |
| VPS37C    | 0.094452 | 0.526378 | 0.349959 |
| CCDC151   | 0.724989 | -0.19523 | 0.877248 |
| TMEM189   | 0.000862 | 2.516248 | 0.027972 |

|           |          |          |          |
|-----------|----------|----------|----------|
| TRAPPC13  | 0.845694 | -0.20219 | 0.942239 |
| CNOT1     | 0.000641 | 0.370828 | 0.023555 |
| ARHGEF35  | 0.777937 | -0.14277 | 0.906856 |
| MEGF11    | 1        | -0.02585 | 1        |
| CCDC88B   | 0.083229 | 1.075928 | 0.332962 |
| KRT87P    |          | 0        |          |
| FAM83G    | 0.030715 | 0.927185 | 0.211475 |
| ASPDH     | 0.974393 | -0.0948  | 0.998921 |
| PALM3     | 0.685856 | -0.05478 | 0.857881 |
| PGP       | 0.739056 | 0.255847 | 0.886253 |
| C5orf51   | 0.179497 | 0.319647 | 0.471072 |
| RCCD1     | 0.913914 | 0.330536 | 0.97604  |
| PLEKHD1   | 0.377974 | -0.68189 | 0.659304 |
| SOWAHB    | 0.942624 | 0.070702 | 0.988547 |
| ZNF316    | 0.276259 | 0.575233 | 0.579642 |
| TCAF2     | 0.737731 | 0.18278  | 0.886077 |
| MFSD2B    | 0.331588 | -0.11214 | 0.619341 |
| CCDC160   | 0.393617 | -0.37482 | 0.671013 |
| GLTPD2    | 0.657906 | -0.19469 | 0.842898 |
| CAPN8     | 0.952829 | 0.040122 | 0.993074 |
| TUBAL3    | 0.018367 | 0.31847  | 0.163766 |
| FBLL1     | 0.670122 | 0.310322 | 0.850681 |
| SMCHD1    | 0.121915 | 0.237706 | 0.397343 |
| GATSL2    | 0.190786 | 0.523382 | 0.484103 |
| ARHGAP42  | 0.324802 | 0.402809 | 0.61537  |
| NCF1B     | 0.725845 | -0.18409 | 0.877996 |
| CCDC69    | 0.90576  | 0.042372 | 0.973334 |
| UNC119B   | 0.724083 | 0.422958 | 0.876654 |
| WTIP      | 0.980555 | 0.011016 | 1        |
| METTL15   | 0.629237 | 0.156301 | 0.830125 |
| SOWAHD    | 0.40269  | -0.27213 | 0.678038 |
| C2orf70   |          | 0        |          |
| IRG1      | 0.683728 | -0.05326 | 0.85709  |
| GLOD5     | 0.000637 | -1.98553 | 0.023555 |
| LIPT2     | 0.33402  | -0.76994 | 0.620956 |
| RASSF10   | 0.714696 | 0.265922 | 0.871878 |
| CCDC85C   | 0.511224 | 0.323585 | 0.754376 |
| PCP4L1    | 0.584108 | -0.79792 | 0.80019  |
| RGPD3     | 0.553712 | -0.21315 | 0.783439 |
| TTC36     | 0.163438 | -0.25217 | 0.453012 |
| COL6A6    | 0.014932 | -1.44975 | 0.150049 |
| BTBD11    | 0.796103 | -0.14917 | 0.914603 |
| ANKRD36   | 0.352362 | 0.346547 | 0.637424 |
| ZSWIM8    | 0.703285 | 0.117349 | 0.866874 |
| ARHGAP32  | 0.752808 | -0.20576 | 0.893843 |
| TBKBP1    | 0.021806 | 0.38819  | 0.176756 |
| POM121C   | 0.011828 | 1.555673 | 0.13136  |
| A2ML1     | 0.155961 | 0.575745 | 0.44616  |
| CLCA1     | 0.49063  | 0.06203  | 0.738656 |
| YDJC      | 0.61918  | -0.36968 | 0.822829 |
| LYRM9     | 0.093078 | -1.03109 | 0.347256 |
| STRA13    | 0.44489  | 0.389773 | 0.706713 |
| FAM166B   | 0.08528  | -0.43645 | 0.335537 |
| HIDE1     | 0.674267 | -0.23064 | 0.853175 |
| NCF1C     | 0.563678 | -0.13157 | 0.789479 |
| PHF20L1   | 0.201881 | 0.645316 | 0.495039 |
| KIAA1324L | 0.825831 | 0.153803 | 0.930917 |
| NUDT19    | 0.474191 | 0.297501 | 0.727018 |

|               |          |          |          |
|---------------|----------|----------|----------|
| ODF3B         | 0.310183 | -0.37232 | 0.609864 |
| COL6A5        | 0.037638 | -1.37307 | 0.232686 |
| MIF4GD        | 0.241663 | 0.262379 | 0.544139 |
| FER1L4        | 0.511124 | -0.35218 | 0.754376 |
| MYO1G         | 0.392997 | 0.10373  | 0.671013 |
| HACD1         |          | 0        |          |
| ESPN          | 0.029786 | 1.655951 | 0.208193 |
| MYO9A         | 0.447716 | 0.245863 | 0.708118 |
| SMIM1         | 0.031257 | -1.77237 | 0.212999 |
| RABGAP1L      | 0.747677 | 0.094777 | 0.890803 |
| PPP1R3G       | 0.174631 | 0.698012 | 0.466796 |
| IGLL5;IGLC1   | 0.609213 | -0.33712 | 0.816529 |
| RASA4B        | 0.78983  | 0.147975 | 0.911741 |
| UMAD1         | 0.635414 | 0.332814 | 0.833511 |
| TMEM238       | 0.615967 | 0.346296 | 0.821456 |
| FAM195B       | 0.053649 | 0.497172 | 0.271145 |
| INAFM1        | 0.638802 | 0.206865 | 0.834211 |
| UPK3BL        | 0.041397 | 0.621785 | 0.240826 |
| ANKRD65       | 0.632486 | -0.15926 | 0.830965 |
| NACA          | 0.085745 | 0.210865 | 0.335537 |
| C11orf98      | 0.538099 | -1.17252 | 0.773967 |
| CNKSR3;IPCEF1 | 0.254274 | 0.425716 | 0.557593 |
| STMND1        | 0.163438 | -0.28282 | 0.453012 |
| CROCC2        | 0.92066  | -0.05654 | 0.98039  |
| SMIM22        | 0.63742  | -0.00858 | 0.833511 |
| SLC35A4       | 0.490639 | 0.31332  | 0.738656 |
| ASNSD1        | 0.946701 | -0.18098 | 0.989712 |
| SMCR7L        | 0.029813 | 2.082825 | 0.208196 |
| DNASE2        | 0.286754 | -0.26361 | 0.590053 |
| AGPS          | 0.059675 | 0.311519 | 0.285693 |
| UBXN8         | 0.005399 | 1.437916 | 0.086909 |
| KIF2A         | 0.169043 | 0.184545 | 0.459676 |
| SGK1          | 0.992139 | -0.02809 | 1        |
| TK2           | 0.123514 | 0.50648  | 0.399387 |
| DDX39A        | 0.05451  | 0.469    | 0.273313 |
| PDLIM1        | 0.103963 | 0.174212 | 0.366863 |
| ACOT7         | 0.006009 | 0.883941 | 0.090802 |
| MYO1C         | 0.301936 | 0.054817 | 0.603275 |
| MYO1F         | 0.226131 | 0.155311 | 0.525131 |
| SNAP23        | 0.415291 | 0.185307 | 0.686028 |
| HAX1          | 0.955289 | -0.09958 | 0.993074 |
| EYA2          | 0.137489 | 0.513329 | 0.422524 |
| FXD1          | 1        | 0.002518 | 1        |
| AIP           | 0.494799 | 0.090756 | 0.741997 |
| GTPBP1        | 0.161013 | 0.240511 | 0.453012 |
| KCNK1         | 0.09103  | 1.315451 | 0.344815 |
| LGALS9        | 0.161013 | 0.252198 | 0.453012 |
| STXBP3        | 0.72417  | 0.069644 | 0.876654 |
| MASP2         | 0.316309 | -0.361   | 0.613139 |
| AP4M1         | 0.246696 | 0.707905 | 0.549922 |
| ARVCF         | 0.16691  | -0.52363 | 0.457139 |
| SMAP          | 0.151385 | 0.701961 | 0.44125  |
| RAB27B        | 0.415291 | -0.39124 | 0.686028 |
| AP3B1         | 0.098469 | 0.175788 | 0.357719 |
| SULT2B1       | 0.490199 | 0.585906 | 0.738656 |
| TLR4          | 0.079293 | 0.229176 | 0.32578  |
| RHOD          | 0.971656 | 0.043076 | 0.997592 |
| APBB1         | 0.137878 | 0.747214 | 0.423394 |

|           |          |          |          |
|-----------|----------|----------|----------|
| LGALS8    | 0.223612 | 0.513676 | 0.521792 |
| NDUFS8    | 0.981581 | -0.0348  | 1        |
| HAS3      | 0.003276 | 1.080963 | 0.065524 |
| TNFRSF10A | 0.208847 | 0.563548 | 0.503054 |
| NFKBIE    | 0.579442 | 0.180989 | 0.797047 |
| PSMD11    | 0.043207 | 0.232115 | 0.246126 |
| PSMD12    | 0.019032 | 0.222464 | 0.166597 |
| PSMD9     | 0.206534 | 0.22669  | 0.500256 |
| SIRPB1    | 0.638802 | 0.109512 | 0.834211 |
| ATOX1     | 0.882017 | -0.31391 | 0.961515 |
| MEN1      | 0.928648 | -0.1763  | 0.983115 |
| CBX4      | 0.022589 | 1.454494 | 0.180886 |
| WRB       | 0.310963 | 0.754782 | 0.609894 |
| PGRMC1    | 0.871617 | 0.070336 | 0.956098 |
| SUPT5H    | 0.118765 | 0.173135 | 0.392409 |
| TAF4      | 0.389244 | 0.505994 | 0.667643 |
| DFFA      | 0.684992 | -0.07326 | 0.85709  |
| RFXAP     | 0.376926 | 0.55249  | 0.658447 |
| HIP1      | 0.934288 | 0.15798  | 0.984157 |
| LEFTY2    | 0.417872 | -0.62743 | 0.688796 |
| CLIC1     | 0.06524  | 0.268032 | 0.298136 |
| EIF3F     | 0.112657 | 0.221183 | 0.382523 |
| WWP2      | 0.943939 | 0.067893 | 0.988547 |
| CDC7      | 0.204864 | 0.535873 | 0.499264 |
| ARNTL     | 0.019021 | 1.117253 | 0.166597 |
| PIK3CD    | 0.228518 | 0.618201 | 0.528484 |
| PDHX      | 0.11568  | -0.22719 | 0.387731 |
| SULT1C2   | 0.920426 | -0.02134 | 0.980269 |
| MATN2     | 0.096798 | -0.96879 | 0.354489 |
| FOXE1     | 0.540968 | 0.263629 | 0.775521 |
| QSOX1     | 0.061485 | 0.534186 | 0.289565 |
| DCTN6     | 0.528737 | -0.42876 | 0.767576 |
| SLC33A1   | 0.072266 | 0.401882 | 0.313701 |
| WASL      | 0.955289 | 0.057599 | 0.993074 |
| PDE2A     | 0.179677 | -0.41076 | 0.471223 |
| IPO5      | 0.051278 | 0.297224 | 0.265139 |
| POLRMT    | 0.020073 | 1.399748 | 0.169555 |
| EEF2K     | 0.779586 | 0.227422 | 0.907186 |
| CCRL2     | 0.163438 | -0.18135 | 0.453012 |
| SAP18     | 0.871617 | -0.08005 | 0.956098 |
| EML1      | 0.424783 | -0.003   | 0.693599 |
| IGF2BP3   | 0.023733 | 1.802582 | 0.186286 |
| DNM1L     | 0.034511 | 0.245576 | 0.222148 |
| RTCA      | 0.081043 | 0.286095 | 0.328405 |
| PIK3C2A   | 0.537409 | 0.137302 | 0.773175 |
| LST1      | 0.105925 | -0.71421 | 0.370605 |
| IFRD1     | 0.008601 | 0.884441 | 0.111593 |
| PIK3R2    | 0.664258 | 0.433219 | 0.847289 |
| GOLIM4    | 0.277896 | 0.191231 | 0.579677 |
| MANBA     | 0.480311 | 0.534985 | 0.732554 |
| TRAF5     | 0.004576 | 1.437211 | 0.078202 |
| AGRN      | 0.000741 | -0.60374 | 0.025686 |
| PLOD2     | 1.71E-06 | 2.537964 | 0.000231 |
| MEIS1     | 0.090516 | 1.164223 | 0.343901 |
| EXOC5     | 0.330591 | 0.141771 | 0.619341 |
| BTN3A3    | 0.67051  | -0.20746 | 0.850681 |
| HMGNA4    | 0.742831 | 0.35373  | 0.888303 |
| BTN3A1    | 0.081448 | 1.24913  | 0.329697 |

|                 |          |          |          |
|-----------------|----------|----------|----------|
| NDUFA4          | 0.164991 | 0.042817 | 0.454525 |
| PSMD14          | 0.992106 | -0.0101  | 1        |
| ZNF593          | 0.329628 | 0.803    | 0.619341 |
| BIN1            | 0.997369 | 0.117302 | 1        |
| CLDN5           | 0.267929 | -1.02516 | 0.570364 |
| KPNA3           | 0.06524  | 0.331423 | 0.298136 |
| STK25           | 0.601312 | 0.477928 | 0.811336 |
| USP9Y           | 0.866049 | -0.07064 | 0.953042 |
| BCL9            | 0.942883 | -0.13354 | 0.988547 |
| LAD1            | 0.929021 | 0.252136 | 0.983115 |
| FAAH            | 0.263524 | -0.37623 | 0.565873 |
| KRIT1           | 0.182493 | 0.766225 | 0.473679 |
| CHL1            | 0.070292 | -1.53975 | 0.309369 |
| VWA5A           | 0.54177  | -0.02415 | 0.775521 |
| PES1            | 0.498977 | 0.178629 | 0.744839 |
| EBAG9           | 0.413309 | 1.264444 | 0.685053 |
| SDCBP           | 0.239034 | 0.185888 | 0.541047 |
| PITPNM1         | 0.731541 | -0.03295 | 0.881584 |
| MPHOSPH10       | 0.029502 | 0.621023 | 0.207615 |
| NOP56           | 0.1882   | 0.148586 | 0.480067 |
| DDX3X           | 1.40E-06 | 0.499347 | 0.000194 |
| RNASET2         | 0.656149 | -0.12141 | 0.84209  |
| CCL21           | 0.649073 | 0.193308 | 0.839222 |
| MFNG            | 0.794772 | 0.087592 | 0.913708 |
| PODXL           | 0.067185 | -0.8624  | 0.302058 |
| FCN1            | 0.219743 | -0.93944 | 0.517665 |
| CYR61           | 0.017624 | 1.71284  | 0.161008 |
| PEX12           | 0.41034  | 0.634488 | 0.683141 |
| PIR             | 0.277785 | -0.39819 | 0.579677 |
| PEX7            | 0.40774  | -0.38464 | 0.680612 |
| KPNA4           | 0.003027 | 0.401003 | 0.062294 |
| TRIM38          | 0.597715 | 0.118621 | 0.808505 |
| NFIB            | 0.611442 | -0.29286 | 0.818417 |
| PPP6C           | 0.118765 | 0.172172 | 0.392409 |
| NME4            | 0.475968 | -0.62094 | 0.728924 |
| CES2            | 0.898276 | -0.19772 | 0.970275 |
| PIK3C2B         | 0.594251 | 0.147617 | 0.806337 |
| MAN2B1          | 0.039909 | 0.267324 | 0.23845  |
| FBP2            | 0.441947 | -0.38718 | 0.703704 |
| UBE2C           | 0.513979 | 0.507948 | 0.756193 |
| PDXK            | 0.063339 | 0.207514 | 0.294055 |
| SCD             | 0.628711 | -0.54285 | 0.829728 |
| DLGAP1          | 0.677587 | -0.30014 | 0.854568 |
| CLDN4           | 0.108082 | -1.50518 | 0.374055 |
| PPAP2A          | 0.443256 | 0.659036 | 0.704724 |
| PPAP2B          | 0.887208 | -0.13967 | 0.96416  |
| ARID1A          | 0.840557 | 0.081615 | 0.939212 |
| ISLR            | 2.08E-06 | 1.610698 | 0.000262 |
| BHLHE40         | 0.109471 | 0.910134 | 0.377423 |
| CDK2AP1;CDK2AP2 | 0.047127 | 1.774969 | 0.25572  |
| SDHD            | 0.843152 | 0.31638  | 0.941448 |
| C2CD2L          | 0.728536 | -0.0561  | 0.879656 |
| TMEM194A        | 0.532114 | 0.543552 | 0.770856 |
| TXNDC9          | 0.30191  | 0.419336 | 0.603275 |
| DPYSL4          | 0.077124 | 0.977536 | 0.324464 |
| TRAFD1          | 0.222253 | 0.978929 | 0.520592 |
| COX7A2L         | 0.751531 | 0.53317  | 0.893092 |
| HSPB6           | 0.413404 | -0.35616 | 0.685053 |

|             |          |          |          |
|-------------|----------|----------|----------|
| NDUFAB1     | 0.494799 | -0.11764 | 0.741997 |
| UBFD1       | 0.06182  | 0.897439 | 0.290811 |
| CYB561D2    | 0.905487 | -0.39178 | 0.973135 |
| DYNC111     | 0.576148 | 0.365202 | 0.796634 |
| CIT         | 0.586215 | 0.379986 | 0.801141 |
| COPE        | 0.00344  | 0.386326 | 0.067417 |
| RFXANK      | 0.58572  | -0.38125 | 0.801141 |
| CTDSP2      | 0.306086 | 0.31736  | 0.607626 |
| VCY         | 0.331588 | -0.16502 | 0.619341 |
| EIF1AY      | 0.127585 | -1.0867  | 0.406389 |
| GNGT2       | 0.966966 | -0.04903 | 0.996989 |
| CDC42EP2    | 0.556057 | 0.111256 | 0.783439 |
| AP3D1       | 0.000275 | 0.374601 | 0.013262 |
| CCS         | 0.936911 | -0.01703 | 0.986451 |
| ENPP3       | 0.236409 | 0.942813 | 0.537858 |
| ABLIM1      | 0.009173 | -0.561   | 0.116274 |
| DVL1;DVL1P1 | 0.001081 | 2.071299 | 0.031645 |
| DVL2        | 0.017599 | 1.999796 | 0.160979 |
| DNALI1      | 0.195154 | -0.66889 | 0.489252 |
| CHD1        | 0.345732 | 0.371371 | 0.632445 |
| CHD2        | 0.699592 | 0.092832 | 0.864146 |
| KCNK3       |          | 0        |          |
| GOSR2       | 0.280828 | 0.030787 | 0.583434 |
| IRS4        | 0.349307 | -0.13382 | 0.635421 |
| TOR1A       | 0.047465 | 0.363561 | 0.255923 |
| TOR1B       | 0.112657 | 0.404907 | 0.382523 |
| STX16       | 0.096468 | 0.373338 | 0.354164 |
| ADAM10      | 0.213733 | 0.230145 | 0.509228 |
| ABCD4       | 0.617435 | 0.30846  | 0.822194 |
| EI24        | 0.809658 | 0.250804 | 0.921586 |
| ENC1        | 0.095134 | 0.499236 | 0.35136  |
| TP53I11     | 0.503174 | 0.006494 | 0.747596 |
| PTGES       | 0.693534 | 0.679435 | 0.861478 |
| KMT2D       | 0.610081 | 0.123131 | 0.817298 |
| ITGB1BP1    | 0.257067 | 0.665718 | 0.560462 |
| RGPD8       | 0.062371 | 0.472351 | 0.292127 |
| APAF1       | 0.060968 | 0.902405 | 0.288605 |
| RIOK3       | 0.973565 | -0.03215 | 0.998921 |
| IMPA2       | 0.528892 | -0.25848 | 0.767592 |
| MAP2K7      | 0.700375 | 0.332366 | 0.864922 |
| ACOT8       | 0.955286 | 0.39131  | 0.993074 |
| CDIPT       | 0.161013 | 0.473349 | 0.453012 |
| PDCD5       | 0.533067 | 0.113347 | 0.7709   |
| PRMT5       | 0.627809 | 0.112779 | 0.828932 |
| SLC9A3R1    | 0.135171 | -0.20956 | 0.417833 |
| HSD17B6     | 0.008178 | -2.3139  | 0.108497 |
| CHEK1       | 0.198062 | 0.654939 | 0.491653 |
| TNFRSF10B   | 0.114869 | 0.990949 | 0.387168 |
| FPGT        | 0.437458 | 0.575711 | 0.701933 |
| TPP1        | 0.223612 | 0.163051 | 0.521792 |
| GNB5        | 0.683128 | 0.144629 | 0.85709  |
| TCERG1      | 0.204174 | 0.145909 | 0.497963 |
| NDC80       | 0.028166 | 0.921309 | 0.203235 |
| KIF3C       | 0.022384 | 0.783331 | 0.179899 |
| NRP1        | 0.067188 | 0.353646 | 0.302058 |
| TNPO2       | 0.382127 | 0.198881 | 0.661698 |
| TNFSF11     | 0.988991 | 0.051303 | 1        |
| APOL1       | 0.599446 | -0.57064 | 0.810262 |

|                |          |          |          |
|----------------|----------|----------|----------|
| HS3ST1         | 0.547409 | 0.297229 | 0.779573 |
| UNC13B         | 0.124833 | -0.70849 | 0.401334 |
| TNFRSF10C      | 0.366543 | -0.54293 | 0.649206 |
| POLR3A         | 0.27498  | 0.480541 | 0.577625 |
| MRAS           | 0.187053 | 1.294285 | 0.479235 |
| CAPN9          | 0.976419 | 0.008145 | 0.998921 |
| TSPAN4         | 0.804328 | 0.15907  | 0.918848 |
| PSMA7          | 0.882017 | 0.044267 | 0.961515 |
| RASGRF2        | 0.008984 | 1.502477 | 0.11506  |
| SCAMP3         | 0.856059 | 0.032814 | 0.946993 |
| PHYH           | 0.509829 | 0.135935 | 0.753633 |
| OPLAH          | 0.206534 | -0.40071 | 0.500256 |
| AIM2           | 0.241325 | 0.347304 | 0.544139 |
| SLC30A4        | 0.992139 | -0.09811 | 1        |
| BACH1          | 0.005001 | 1.21767  | 0.082994 |
| BCKDK          | 0.651389 | 0.093231 | 0.839222 |
| IFIT3          | 0.72417  | 0.058473 | 0.876654 |
| MGST3          | 0.117214 | 0.419577 | 0.389929 |
| GEMIN2         | 0.004197 | 2.1639   | 0.073945 |
| IRF6           | 0.126059 | 1.047349 | 0.403148 |
| WNT9A          | 0.40269  | -0.3351  | 0.678038 |
| WNT9B          | 0.384669 | 0.389184 | 0.66413  |
| TAX1BP3        | 0.039276 | 0.7199   | 0.236232 |
| GIPC1          | 0.714303 | 0.035792 | 0.87164  |
| LIN7A          | 0.881708 | -0.12742 | 0.961515 |
| PCDH17         | 0.375687 | -0.28203 | 0.657392 |
| IKKBK          | 0.008914 | 0.503859 | 0.114289 |
| RGS12          | 0.325226 | 0.34065  | 0.615753 |
| TIMM23;TIMM23B | 0.146729 | -0.03386 | 0.435709 |
| HAT1           | 0.040551 | 0.756982 | 0.240216 |
| UBE2L6         | 0.0799   | 0.374536 | 0.325919 |
| CASK           | 0.32085  | 0.218186 | 0.613139 |
| PLD2           | 0.623778 | 0.424236 | 0.826562 |
| TFEC           | 0.300882 | 0.277926 | 0.602797 |
| UQCRQ          | 0.044589 | -0.57429 | 0.24851  |
| MYL12B         | 0.000289 | 0.455626 | 0.013838 |
| UQCR11         | 0.933998 | -0.1139  | 0.984157 |
| LECT2          | 0.906751 | -0.02712 | 0.9734   |
| HGS            | 0.177368 | 0.195124 | 0.468602 |
| AURKA          | 0.023492 | 0.936937 | 0.184921 |
| RAB29          | 0.616124 | 0.213766 | 0.821456 |
| CLGN           | 0.461342 | 0.397742 | 0.718747 |
| DSCR3          | 0.627809 | 0.044763 | 0.828932 |
| PPP1R12A       | 0.001789 | 0.424369 | 0.044281 |
| SLC27A2        | 0.700994 | 0.57489  | 0.865518 |
| GAK            | 0.494799 | 0.103272 | 0.741997 |
| HNRNPDL        | 0.159052 | 0.275941 | 0.449897 |
| XPO1           | 0.274985 | 0.143303 | 0.577625 |
| BTAf1          | 0.019371 | 0.738937 | 0.167192 |
| ATP2A1         | 0.186982 | -0.32846 | 0.479162 |
| ARHGEF10       | 0.003581 | 0.70323  | 0.068752 |
| ZNF609         | 0.234582 | 0.559607 | 0.536443 |
| PDZD2          | 0.988072 | 0.067865 | 1        |
| SPTBN2         | 0.482372 | -0.30775 | 0.733586 |
| MAST4          | 0.074743 | 0.560655 | 0.318513 |
| SEC16A         | 0.093209 | 0.253039 | 0.347256 |
| PLXNB2         | 0.357491 | 0.185415 | 0.641472 |
| KHNYN          | 0.029995 | 1.288143 | 0.209097 |



|          |          |          |          |
|----------|----------|----------|----------|
| TECPR2   | 0.090902 | 0.718277 | 0.344565 |
| U2SURP   | 0.226131 | 0.218884 | 0.525131 |
| SETD1A   | 0.036833 | 0.961097 | 0.229759 |
| N4BP3    | 0.430232 | -0.36577 | 0.695651 |
| TRANK1   | 0.335919 | 0.413759 | 0.623545 |
| SYNJ2    | 0.005023 | 1.42899  | 0.083138 |
| SYNM     | 0.520142 | -0.35801 | 0.760272 |
| ZBTB5    | 0.011513 | 0.626085 | 0.129242 |
| KIAA0355 | 0.028695 | 0.76711  | 0.204946 |
| KIF3B    | 0.122702 | 0.60641  | 0.398971 |
| PFAS     | 0.524435 | 0.098205 | 0.764023 |
| MCF2L    | 0.352984 | 0.398863 | 0.638094 |
| NACAD    | 0.499616 | 0.038897 | 0.745391 |
| DCLK1    | 0.350635 | 0.217414 | 0.635657 |
| CEP290   | 0.154165 | 0.718807 | 0.444958 |
| ERC2     | 0.001508 | 1.688191 | 0.039821 |
| ANKRD28  | 0.118765 | 0.490905 | 0.392409 |
| ARHGEF11 | 0.000502 | 1.223555 | 0.020488 |
| KIAA0391 | 0.446145 | 0.31667  | 0.706795 |
| CHUK     | 0.156143 | 0.283997 | 0.446449 |
| LSM1     | 0.000212 | 0.675082 | 0.011116 |
| FYB      | 0.672844 | -0.37493 | 0.85208  |
| NPC1     | 0.665709 | -0.00441 | 0.847351 |
| TBX3     | 0.556057 | 0.101268 | 0.783439 |
| AGPAT2   | 0.744027 | -0.35854 | 0.888303 |
| DEGS1    | 0.085745 | 0.392033 | 0.335537 |
| ANGPT2   | 0.273609 | 0.618445 | 0.577625 |
| SCAMP1   | 0.494799 | 0.142723 | 0.741997 |
| SCAMP2   | 0.856059 | 0.079557 | 0.946993 |
| KPNA5    | 0.319672 | -0.32449 | 0.613139 |
| ARPC1B   | 0.120331 | 0.186409 | 0.39497  |
| ARPC2    | 0.045294 | 0.167192 | 0.250872 |
| ARPC3    | 0.45805  | 0.082404 | 0.715224 |
| BET1     | 0.046732 | 0.807781 | 0.254194 |
| ZBTB7B   | 0.703791 | -0.55645 | 0.867291 |
| POLR1C   | 0.364426 | 0.092554 | 0.646996 |
| PLSCR1   | 0.06524  | 0.471962 | 0.298136 |
| TRIM24   | 0.145421 | 0.965503 | 0.434185 |
| AXIN1    | 0.455572 | 0.218774 | 0.71417  |
| PGRMC2   | 0.031791 | 0.250603 | 0.214212 |
| CETN3    | 0.028045 | 1.690572 | 0.203111 |
| CTDSPL   | 0.409977 | 0.367114 | 0.682809 |
| VILL     | 0.922175 | -0.17246 | 0.980751 |
| ADAMDEC1 | 0.156241 | 0.975374 | 0.446614 |
| UBD      | 1        | -0.02556 | 1        |
| RGL2     | 0.644245 | 0.034069 | 0.837353 |
| PFDN6    | 0.347246 | 0.177313 | 0.632606 |
| WDR46    | 0.193446 | 0.987758 | 0.487504 |
| GSTA4    | 0.073739 | -0.94561 | 0.316871 |
| NKRF     | 0.139177 | 0.96752  | 0.425119 |
| GNPAT    | 0.071226 | 0.407837 | 0.311134 |
| KMO      | 0.621836 | 0.286753 | 0.825962 |
| LAMA5    | 0.006911 | -0.73825 | 0.099675 |
| ZNF185   | 0.374984 | -0.21907 | 0.656862 |
| MATN3    | 0.035703 | 0.934614 | 0.225628 |
| CASC3    | 0.105994 | 1.006988 | 0.370631 |
| MRPS12   | 0.818856 | 0.050013 | 0.92687  |
| NDUFA1   | 0.931372 | -0.06036 | 0.984157 |

|         |          |          |          |
|---------|----------|----------|----------|
| LEPROT  | 0.835355 | -0.5379  | 0.935999 |
| CLIC2   | 0.007628 | -0.86923 | 0.10525  |
| ACOX3   | 0.902877 | -0.21536 | 0.971583 |
| RER1    | 0.709387 | 0.02662  | 0.869179 |
| SURF4   | 0.00266  | 0.591127 | 0.057508 |
| MAPK13  | 0.008089 | -0.45094 | 0.107782 |
| ATXN7   | 0.435689 | 0.157737 | 0.700018 |
| SPTLC1  | 0.136904 | 0.153124 | 0.421544 |
| SPTLC2  | 0.546147 | -0.26037 | 0.778738 |
| OGT     | 0.003823 | 0.392995 | 0.070612 |
| ALOX15B | 0.531923 | -0.39436 | 0.77068  |
| PMM2    | 0.845718 | -0.01606 | 0.942239 |
| POLR3G  | 0.338495 | 0.699363 | 0.625708 |
| TM9SF1  | 0.06524  | 0.334404 | 0.298136 |
| INPP4B  | 0.009804 | 1.917975 | 0.119724 |
| CHAD    | 0.306086 | 0.216649 | 0.607626 |
| MID1    | 0.134935 | 0.86706  | 0.417833 |
| HMGB3   | 0.871617 | 0.023821 | 0.956098 |
| PPM1G   | 0.923804 | 0.000222 | 0.980751 |
| INPPL1  | 0.155183 | 0.278994 | 0.444958 |
| FANCA   | 0.749046 | -0.02248 | 0.890902 |
| EIF3D   | 0.470127 | 0.005523 | 0.72456  |
| EIF3H   | 0.923804 | -0.02995 | 0.980751 |
| SLC16A4 | 0.71099  | 0.24672  | 0.870136 |
| HDAC3   | 0.016733 | 1.124408 | 0.156698 |
| NVL     | 0.325683 | 0.40424  | 0.616409 |
| BCAT2   | 0.2958   | -0.1822  | 0.598344 |
| SIGLEC5 | 0.416936 | 0.256248 | 0.687847 |
| TMPRSS2 | 0.099213 | -1.1258  | 0.358779 |
| NCAM2   | 0.110383 | 1.048768 | 0.378842 |
| IPO8    | 0.085137 | 0.661496 | 0.335537 |
| STX7    | 0.577274 | 0.091619 | 0.796634 |
| TOX3    | 0.296639 | -0.46753 | 0.599275 |
| TNRC18  | 0.745068 | 0.118274 | 0.888646 |
| SLC16A3 | 0.015629 | 1.039418 | 0.152856 |
| SLC31A1 | 0.009172 | 2.567118 | 0.116274 |
| ABCC3   | 0.400346 | -0.39429 | 0.67622  |
| ABCC4   | 0.789358 | 0.251115 | 0.911483 |
| ABCC5   | 0.744634 | 0.134465 | 0.888419 |
| CD3EAP  | 0.343341 | 0.794715 | 0.630156 |
| TLR3    | 0.40398  | 0.673099 | 0.678271 |
| P4HA2   | 3.86E-07 | 1.427876 | 7.02E-05 |
| MAGEB2  | 0.437275 | 0.526071 | 0.70193  |
| CAPN5   | 0.604483 | -0.41551 | 0.813002 |
| GYG2    | 0.038799 | 1.014271 | 0.236048 |
| PLA2G10 | 0.046045 | -0.90376 | 0.252441 |
| YKT6    | 0.031791 | 0.321941 | 0.214212 |
| NUPL2   | 0.768442 | -0.20244 | 0.901915 |
| ARPC5   | 0.103963 | 0.232673 | 0.366863 |
| POLR2D  | 0.309724 | 0.414976 | 0.609864 |
| CLOCK   | 0.547842 | -0.27834 | 0.779889 |
| CFLAR   | 0.969389 | 0.020734 | 0.997592 |
| DDX3Y   | 0.757524 | 0.190479 | 0.896847 |
| MAFG    | 0.760503 | 0.354101 | 0.89779  |
| CYP27B1 | 0.310183 | 0.239434 | 0.609864 |
| PDPK1   | 0.960544 | -0.04386 | 0.994122 |
| TAPBP   | 0.764084 | 0.00873  | 0.899242 |
| FABP7   | 0.657906 | -0.23813 | 0.842898 |

|          |          |          |          |
|----------|----------|----------|----------|
| RNF113A  | 0.970476 | 0.481154 | 0.997592 |
| KDM6A    | 0.534152 | 0.352486 | 0.771496 |
| CLDN3    | 0.444482 | -0.7574  | 0.706268 |
| KCNN4    | 0.062362 | 1.142286 | 0.292127 |
| DHX15    | 0.066208 | 0.176271 | 0.300455 |
| RNMT     | 0.010002 | 0.458275 | 0.120967 |
| ZZEF1    | 0.084549 | 0.249679 | 0.335025 |
| ASAP2    | 0.833363 | 0.275692 | 0.935999 |
| FLRT2    | 0.416636 | 0.739175 | 0.687635 |
| TTI1     | 0.030344 | 0.987995 | 0.209948 |
| PLXNB1   | 0.277875 | -0.6052  | 0.579677 |
| RRP8     | 0.213689 | 0.537114 | 0.509228 |
| PJA2     | 0.019721 | 1.209684 | 0.1684   |
| SIPA1L1  | 0.320557 | 0.717868 | 0.613139 |
| CYB5B    | 0.118765 | 0.222101 | 0.392409 |
| PRPF4    | 0.213733 | 0.189483 | 0.509228 |
| PHGDH    | 0.029257 | 0.469196 | 0.20681  |
| NDUFS4   | 0.241676 | 0.422243 | 0.544139 |
| ARHGAP6  | 0.987478 | -0.0725  | 1        |
| ADAM12   | 0.052184 | 1.065124 | 0.267704 |
| CRX      | 0.988991 | 0.11987  | 1        |
| IRAK2    | 0.744555 | 0.172518 | 0.888419 |
| PHF1     | 0.04624  | 0.943734 | 0.253009 |
| GPR39    | 0.720513 | 0.108057 | 0.87575  |
| SEPTIN4  | 0.41301  | -0.17221 | 0.684707 |
| DYNC1LI2 | 0.136904 | 0.195827 | 0.421544 |
| KLK10    | 0.787673 | -0.08961 | 0.911483 |
| PSMD3    | 0.043893 | 0.218694 | 0.247494 |
| SLC7A4   | 0.563678 | -0.18445 | 0.789479 |
| RBFOX2   | 0.00018  | 1.726634 | 0.00976  |
| PAPSS1   | 0.015914 | 0.519539 | 0.153751 |
| ZNHIT1   | 0.681268 | 0.202308 | 0.856391 |
| ZW10     | 0.206534 | 0.200551 | 0.500256 |
| PRODH    | 0.697084 | 0.54064  | 0.863357 |
| SPINT1   | 0.332231 | 0.320789 | 0.620025 |
| EFS      | 0.33352  | 0.607559 | 0.620902 |
| B4GALT5  | 0.152354 | 0.6685   | 0.443165 |
| SART1    | 0.048208 | 0.414412 | 0.257798 |
| SPINT2   | 0.786816 | -0.13268 | 0.911452 |
| GPAA1    | 0.02152  | 0.364022 | 0.175496 |
| DAPK3    | 8.57E-05 | 1.073568 | 0.005524 |
| TGFB1I1  | 0.000116 | 0.982389 | 0.007119 |
| AP5Z1    | 0.021329 | 0.586319 | 0.174974 |
| HSPA12A  | 0.025979 | 1.007031 | 0.193808 |
| CCP110   | 0.368302 | 0.435393 | 0.651177 |
| ADCY6    | 0.481556 | 0.213438 | 0.733586 |
| CTIF     | 0.0002   | 1.68458  | 0.010594 |
| MTSS1    | 0.682281 | 0.400319 | 0.85709  |
| ATMIN    | 0.705459 | 0.060927 | 0.868107 |
| PPIP5K2  | 0.086906 | 0.911335 | 0.337854 |
| MAP3K7   | 0.095005 | 0.775109 | 0.35136  |
| EEF1E1   | 0.374984 | -0.04589 | 0.656862 |
| LYRM1    | 0.782206 | 0.271913 | 0.909001 |
| MSI1     | 0.315978 | 0.577408 | 0.613139 |
| RIPK2    | 0.032442 | 1.171609 | 0.216498 |
| WDR62    | 0.383477 | 0.347848 | 0.663206 |
| HNRNPR   | 0.088177 | 0.19223  | 0.339301 |
| PRPF3    | 0.613839 | 0.08107  | 0.819264 |

|         |          |          |          |
|---------|----------|----------|----------|
| TXNL1   | 0.392997 | 0.085246 | 0.671013 |
| TPD52L2 | 0.324076 | 0.092151 | 0.614309 |
| EMC8    | 0.490639 | 0.076646 | 0.738656 |
| COCH    | 0.032251 | 1.288815 | 0.215938 |
| ERI3    | 0.563832 | 0.124316 | 0.789479 |
| PRKRIR  | 0.352067 | 0.393845 | 0.637306 |
| SYNJ1   | 0.016813 | 1.182753 | 0.156698 |
| FIBP    | 0.71923  | -0.20889 | 0.874478 |
| EIF4G3  | 0.000554 | 1.317181 | 0.021722 |
| PPIH    | 0.149515 | 0.445997 | 0.438811 |
| MGAM    | 0.401633 | -0.56167 | 0.677774 |
| MBTPS2  | 0.041014 | 1.128964 | 0.240826 |
| HTRA2   | 0.374984 | 0.147378 | 0.656862 |
| KLF4    | 1        | -0.03619 | 1        |
| AKR7A2  | 0.744041 | -0.10607 | 0.888303 |
| PROM1   | 0.603077 | -0.36516 | 0.812922 |
| EPB41L2 | 0.157109 | 0.22635  | 0.447022 |
| TGOLN2  | 0.23772  | -0.33666 | 0.540388 |
| RAD51C  | 0.248359 | 0.358939 | 0.551794 |
| LAMTOR5 | 0.709387 | 0.041237 | 0.869179 |
| B4GAT1  | 0.497152 | -0.57694 | 0.744118 |
| MED7    | 0.022424 | 1.329379 | 0.179962 |
| WIPF1   | 0.007758 | 1.089641 | 0.105988 |
| ATP8B1  | 0.396617 | -0.43464 | 0.67382  |
| BCL2L11 | 0.018083 | 1.419181 | 0.16292  |
| FOXO3   | 0.22454  | 0.604553 | 0.523628 |
| CHST10  | 0.321952 | 0.380586 | 0.613139 |
| XRCC3   | 0.744387 | -0.14202 | 0.888419 |
| TGM5    | 0.34344  | -0.39375 | 0.630156 |
| SGCE    | 0.045674 | 1.737799 | 0.251649 |
| RGS14   | 0.000699 | 1.953174 | 0.024703 |
| RNF13   | 0.833924 | -0.38657 | 0.935999 |
| CA12    | 0.20274  | 1.096877 | 0.496815 |
| AKAP10  | 0.109779 | 1.141609 | 0.377536 |
| SYT7    | 0.77903  | 0.115125 | 0.906856 |
| DENR    | 0.020781 | 0.338547 | 0.172048 |
| PSTPIP1 | 0.817979 | 0.012874 | 0.92687  |
| XPOT    | 0.018045 | 0.757065 | 0.162744 |
| SPRY2   | 0.322009 | 0.082639 | 0.613139 |
| DNPH1   | 0.511623 | -0.17795 | 0.754376 |
| SPRY1   | 0.993518 | -0.04229 | 1        |
| TIMM44  | 0.144006 | 0.266716 | 0.431666 |
| TRAPPC3 | 0.684992 | 0.107693 | 0.85709  |
| CHMP2A  | 0.709387 | 0.06569  | 0.869179 |
| NCK2    | 0.146729 | 0.626063 | 0.435709 |
| PSCA    | 1        | -0.04668 | 1        |
| TSPAN6  | 0.350635 | 0.437216 | 0.635657 |
| PLRG1   | 0.105374 | 0.303492 | 0.369374 |
| PRC1    | 0.485202 | 0.360474 | 0.735764 |
| RGS10   | 0.032318 | 0.922029 | 0.215938 |
| ZNF207  | 0.112657 | 0.254946 | 0.382523 |
| NDUFB5  | 0.577274 | 0.110401 | 0.796634 |
| NDUFB3  | 0.149515 | 0.231003 | 0.438811 |
| NDUFC1  | 0.632674 | 0.415529 | 0.831021 |
| NDUFA2  | 0.415291 | -0.13917 | 0.686028 |
| ASNA1   | 0.181644 | 0.130677 | 0.472575 |
| BUB1    | 0.241325 | 0.212074 | 0.544139 |
| BUB3    | 0.33719  | 0.054622 | 0.624371 |

|          |          |          |          |
|----------|----------|----------|----------|
| AKAP7    | 0.683728 | -0.0727  | 0.85709  |
| PPAP2C   | 0.140042 | 1.404554 | 0.426568 |
| PI15     | 0.001066 | 3.085932 | 0.031612 |
| SULT1B1  | 0.898675 | -0.28723 | 0.970517 |
| ACTN4    | 0.003666 | 0.258517 | 0.06938  |
| GSTZ1    | 0.786821 | -0.22572 | 0.911452 |
| WBSCR22  | 0.37135  | 0.890672 | 0.65423  |
| TRIAP1   | 0.392711 | 0.431946 | 0.671013 |
| GATC     | 0.548162 | -0.17369 | 0.780144 |
| HTATSF1  | 0.470127 | 0.250471 | 0.72456  |
| KDELR3   | 0.040466 | 1.796998 | 0.240216 |
| TRAF3IP2 | 0.041397 | 0.408425 | 0.240826 |
| ITM2A    | 0.993518 | -0.1329  | 1        |
| CYTH3    | 0.450092 | -0.06142 | 0.709598 |
| PRKAB2   | 0.002281 | 1.692587 | 0.051363 |
| AP1G1    | 0.199513 | 0.173184 | 0.49217  |
| STX6     | 0.709387 | 0.068275 | 0.869179 |
| SYNGR1   | 0.395026 | -0.90626 | 0.672485 |
| SYNGR2   | 0.454064 | -0.16519 | 0.712914 |
| SYNGR3   | 0.244375 | -0.38656 | 0.547425 |
| SGTA     | 0.09193  | 0.51795  | 0.345626 |
| LIAS     | 0.231403 | 0.717272 | 0.532247 |
| ENSA     | 0.931664 | 0.401859 | 0.984157 |
| SLC25A20 | 0.241676 | -0.1861  | 0.544139 |
| NARS     | 0.023873 | 0.232274 | 0.186463 |
| KRT86    | 0.145657 | 1.122461 | 0.434185 |
| SPOP     | 0.684849 | 0.2929   | 0.85709  |
| MYO1B    | 0.286754 | -0.10162 | 0.590053 |
| SSNA1    | 0.236593 | -0.71961 | 0.538047 |
| SLC25A17 | 0.213774 | 0.781889 | 0.509228 |
| NUDT21   | 0.039276 | 0.263677 | 0.236232 |
| DUX1     | 0.322009 | 0.112696 | 0.613139 |
| LANCL1   | 0.913333 | -0.04492 | 0.975706 |
| STRN     | 0.082198 | 0.144089 | 0.330671 |
| RRP9     | 0.308157 | 0.257799 | 0.609277 |
| SCO2     | 0.037972 | -0.56577 | 0.233324 |
| C21orf2  | 0.066681 | 1.325345 | 0.301803 |
| AKAP8    | 0.496547 | 0.924931 | 0.74366  |
| GTPBP6   | 0.873982 | 0.301614 | 0.957716 |
| SLC37A4  | 0.799289 | -0.6403  | 0.916173 |
| ZBTB14   | 0.536411 | 0.234291 | 0.773175 |
| IDH3B    | 0.563832 | -0.09365 | 0.789479 |
| NRD1     | 0.159051 | 0.740346 | 0.449897 |
| CALU     | 0.000242 | 0.613544 | 0.012083 |
| EDIL3    | 0.122791 | 1.344676 | 0.399027 |
| ATP9B    | 0.970852 | 0.18849  | 0.997592 |
| AHCYL1   | 0.950035 | 0.015798 | 0.990863 |
| CD5L     | 0.253772 | 0.915178 | 0.557407 |
| XPNPEP2  | 0.221132 | 0.462898 | 0.519064 |
| KIF1C    | 0.533238 | 0.451244 | 0.7709   |
| GAS2     | 0.019926 | -1.03326 | 0.169351 |
| EXTL3    | 0.684184 | 0.262139 | 0.85709  |
| ORC5     | 0.291142 | 0.766776 | 0.595183 |
| TYROBP   | 0.160231 | 0.878303 | 0.452801 |
| FIGF     | 0.014023 | -0.97701 | 0.144006 |
| NDUFS5   | 0.825116 | 0.031781 | 0.930395 |
| PDE6D    | 0.156143 | 0.243886 | 0.446449 |
| CXCL13   | 0.681785 | -0.49684 | 0.856945 |

|          |          |          |          |
|----------|----------|----------|----------|
| ORC4     | 0.992101 | -0.16537 | 1        |
| PEX1     | 0.960456 | -0.36259 | 0.994122 |
| RAD21    | 0.118765 | 0.281178 | 0.392409 |
| AKR1B10  | 0.503264 | 0.623434 | 0.747616 |
| TIMM8A   | 0.426712 | -0.11423 | 0.693599 |
| KALRN    | 0.771987 | 0.207115 | 0.903653 |
| DHX16    | 0.052873 | 0.72422  | 0.269122 |
| SSSCA1   | 0.056188 | 0.448345 | 0.276683 |
| GMFG     | 0.764083 | 0.256464 | 0.899242 |
| PPP1R12B | 0.950012 | -0.15265 | 0.990863 |
| BNIP3L   | 0.539196 | 0.679614 | 0.775042 |
| SH3BP5   | 0.224923 | 0.305348 | 0.52386  |
| PLIN1    | 0.655601 | -0.37151 | 0.84209  |
| HS6ST1   | 0.903844 | 0.22373  | 0.972246 |
| MED14    | 0.041201 | 0.682216 | 0.240826 |
| PCDH7    | 1.49E-05 | 2.557049 | 0.001321 |
| PRPSAP2  | 0.190424 | -0.14849 | 0.483515 |
| GNG7     | 0.062864 | -0.90633 | 0.293445 |
| SMARCA5  | 0.850885 | 0.064446 | 0.944945 |
| ADCY3    | 0.582301 | 0.193926 | 0.798306 |
| KIAA0513 | 0.15686  | -0.9213  | 0.447022 |
| SPAG9    | 0.632496 | 0.076771 | 0.830965 |
| SUSD5    | 0.010501 | 1.09452  | 0.124559 |
| ZNF292   | 0.352147 | 0.294646 | 0.637347 |
| KIF5C    | 0.725945 | -0.03347 | 0.878021 |
| URB1     | 0.286741 | 0.474276 | 0.590053 |
| MGRN1    | 0.282269 | 0.706827 | 0.58545  |
| SIPA1L3  | 0.305454 | 0.392247 | 0.606804 |
| ZFC3H1   | 0.901249 | -0.00783 | 0.971583 |
| TRAK2    | 0.145176 | 0.324562 | 0.433769 |
| LZTS3    | 0.6787   | -0.31985 | 0.855378 |
| AQR      | 0.081043 | 0.340005 | 0.328405 |
| MAST3    | 0.683359 | 0.334135 | 0.85709  |
| OPA1     | 0.257958 | 0.10197  | 0.560462 |
| ZEB2     | 0.197877 | 0.743224 | 0.491413 |
| MCM3AP   | 0.467999 | 0.279852 | 0.722799 |
| PIP5K1C  | 0.054581 | 0.793546 | 0.273507 |
| KIF1B    | 0.437742 | 0.193376 | 0.701933 |
| MAPKBP1  | 0.332234 | -0.43749 | 0.620025 |
|          | 6-Mar    | 0.517175 | 0.300951 |
| KDM1A    | 0.651389 | 0.086792 | 0.839222 |
| TBC1D4   | 0.018771 | 0.852781 | 0.165951 |
| FZD6     | 0.530339 | 0.433146 | 0.768764 |
| HBP1     | 0.354428 | 0.350041 | 0.63835  |
| FADS1    | 0.002196 | 2.125782 | 0.05007  |
| PPL      | 0.0334   | -0.40204 | 0.219585 |
| DFNA5    | 0.019032 | 0.968032 | 0.166597 |
| EVI5     | 0.027102 | 1.289576 | 0.199066 |
| LY75     | 0.947409 | 0.100904 | 0.990063 |
| NRP2     | 0.001488 | 1.493103 | 0.039474 |
| MAN1A2   | 0.175259 | 0.279604 | 0.466796 |
| GPR137B  | 0.003187 | 0.979467 | 0.064739 |
| PLXNC1   | 0.00094  | 1.035808 | 0.02929  |
| MPZL2    | 0.679473 | -1.00383 | 0.85545  |
| ACSL4    | 0.474191 | 0.132938 | 0.727018 |
| SNX3     | 0.074384 | 0.171732 | 0.317894 |
| DOK2     | 0.233787 | 0.12024  | 0.535403 |
| STX10    | 0.162993 | 0.284296 | 0.453012 |

|          |          |          |          |
|----------|----------|----------|----------|
| MGEA5    | 0.004707 | 0.934189 | 0.079703 |
| ADCY9    | 0.911261 | -0.10443 | 0.975706 |
| SORBS3   | 0.637197 | 0.368989 | 0.833511 |
| SYNCRIP  | 0.016499 | 0.280808 | 0.155558 |
| TPST1    | 5.15E-05 | 1.631723 | 0.003688 |
| CDC40    | 0.280828 | 0.229921 | 0.583434 |
| B4GALT3  | 0.646844 | 0.190194 | 0.837416 |
| B4GALT4  | 0.098077 | 1.048365 | 0.357585 |
| EIF4EBP3 | 0.092612 | -0.73538 | 0.347013 |
| RANBP6   | 0.295726 | 0.610941 | 0.598344 |
| NEMF     | 0.600007 | 0.270361 | 0.810262 |
| GMDS     | 0.613839 | -0.09589 | 0.819264 |
| NMT2     | 0.060068 | 1.44061  | 0.286914 |
| CCNT1    | 0.01624  | 1.659128 | 0.154611 |
| GREM1    | 0.002918 | 2.714969 | 0.061522 |
| PLOD3    | 0.000329 | 0.653303 | 0.015317 |
| EIF4E2   | 0.189109 | 0.324366 | 0.481831 |
| CCNT2    | 0.24005  | 0.795517 | 0.542902 |
| TLR5     | 0.012744 | 2.04187  | 0.137944 |
| TLR2     | 0.97106  | -0.02685 | 0.997592 |
| GFRA3    | 0.260033 | 0.907133 | 0.563617 |
| DIAPH1   | 0.856059 | -0.01648 | 0.946993 |
| SELENOF  | 0.029749 | 0.528871 | 0.208169 |
| TSPAN1   | 0.519655 | -0.66018 | 0.760272 |
| TSPAN2   | 0.879408 | 0.134482 | 0.96104  |
| EXOC3    | 0.866426 | -0.02213 | 0.953042 |
| PDE8A    | 0.650137 | 0.138463 | 0.839222 |
| PLIN3    | 0.001057 | 0.534138 | 0.031507 |
| SLC16A7  | 0.592958 | -0.39675 | 0.806337 |
| RAD1     | 0.347512 | 0.527249 | 0.632849 |
| JAK2     | 0.014    | 1.207747 | 0.144006 |
| MAFK     | 0.715128 | -0.40804 | 0.872263 |
| PRMT3    | 0.689296 | 0.604155 | 0.859429 |
| PEX10    | 0.530339 | 0.479523 | 0.768764 |
| KPNA6    | 0.009812 | 0.371338 | 0.119724 |
| SRPX2    | 2.19E-05 | 2.886332 | 0.001855 |
| UGDH     | 0.327323 | 0.325179 | 0.617719 |
| TPST2    | 0.552221 | 0.146724 | 0.783108 |
| ABCC9    | 0.608679 | 0.175569 | 0.816529 |
| LPXN     | 0.041861 | 0.52012  | 0.242066 |
| CTNND1   | 0.503174 | 0.099112 | 0.747596 |
| ICMT     | 0.214949 | 0.694637 | 0.511258 |
| MAGEC1   | 0.300882 | 0.380856 | 0.602797 |
| PLA2G6   | 0.123186 | -0.71369 | 0.399387 |
| EIF1B    | 0.568426 | 0.527188 | 0.791838 |
| SNX2     | 0.025563 | 0.176038 | 0.193268 |
| HPGDS    | 0.913813 | -0.07889 | 0.976031 |
| DPM1     | 0.577274 | 0.114921 | 0.796634 |
| USO1     | 0.357491 | 0.179625 | 0.641472 |
| SLC19A2  | 0.172617 | 0.385401 | 0.464157 |
| MRPS14   | 0.417074 | -0.00949 | 0.687847 |
| TOM1     | 0.051278 | 0.195367 | 0.265139 |
| PFKFB2   | 0.845716 | 0.068457 | 0.942239 |
| CCDC22   | 0.908103 | 0.018998 | 0.9734   |
| PQBP1    | 0.085043 | 1.862459 | 0.335537 |
| TIMM17B  | 0.934266 | -0.28635 | 0.984157 |
| PRAF2    | 0.067188 | 0.463111 | 0.302058 |
| DKC1     | 0.568296 | -0.02963 | 0.791838 |

|         |          |          |          |
|---------|----------|----------|----------|
| EIF5B   | 0.130075 | 0.226895 | 0.410899 |
| ZG16    | 0.440215 | -0.24916 | 0.70314  |
| TRIM13  | 0.678898 | 0.398326 | 0.855378 |
| GAS7    | 0.357273 | 0.9921   | 0.641472 |
| EDF1    | 0.54177  | -0.05756 | 0.775521 |
| KIN     | 0.041408 | 1.056606 | 0.240826 |
| DIAPH2  | 0.190424 | -0.40731 | 0.483515 |
| SH2D1A  | 0.456054 | 0.237836 | 0.714622 |
| DNAJA2  | 0.142204 | 0.248429 | 0.428816 |
| BRD4    | 0.017412 | 0.457636 | 0.159467 |
| CUTA    | 0.404052 | 0.269855 | 0.678271 |
| OPHN1   | 0.315665 | -0.68904 | 0.613139 |
| RAMP2   | 0.592691 | 0.352011 | 0.806337 |
| SMPD2   | 0.558794 | -0.33374 | 0.78633  |
| TBL1X   | 0.577652 | 0.297822 | 0.796675 |
| CTSV    | 0.721191 | 0.154653 | 0.876242 |
| HUS1    | 0.028124 | 1.773564 | 0.203207 |
| PFDN1   | 0.400346 | 0.037177 | 0.67622  |
| PPP1R11 | 0.604318 | 0.744149 | 0.813002 |
| RNASEH1 | 0.150211 | 0.855239 | 0.440175 |
| NBN     | 0.00187  | 0.893526 | 0.045694 |
| NOL3    | 0.680152 | 0.268417 | 0.85545  |
| DTNB    | 0.011406 | -0.7593  | 0.128971 |
| RNGTT   | 0.075091 | 0.875224 | 0.319336 |
| FCGR3B  | 0.180549 | 0.805721 | 0.472575 |
| LILRB3  | 0.229894 | 0.680495 | 0.529875 |
| LILRB5  | 0.55076  | 0.422213 | 0.781335 |
| ABCB7   | 0.850885 | -0.07938 | 0.944945 |
| MITF    | 0.06743  | 0.964941 | 0.30217  |
| KIF21B  | 0.420517 | -0.65521 | 0.690548 |
| SRGAP2  | 0.000107 | 1.134634 | 0.006638 |
| PLXNA2  | 0.435753 | 0.507504 | 0.70002  |
| NOS1AP  | 0.959748 | -0.03963 | 0.994122 |
| IGSF3   | 0.105675 | 1.070287 | 0.370197 |
| SDC3    | 0.81719  | -0.06362 | 0.926828 |
| FAM20B  | 0.404026 | 0.551997 | 0.678271 |
| DENND4B | 0.515427 | 0.326334 | 0.757825 |
| EFCAB14 | 0.971031 | 0.171604 | 0.997592 |
| WDR1    | 0.131757 | 0.166911 | 0.413476 |
| FZD7    | 0.053192 | 1.307596 | 0.270374 |
| SLIT3   | 0.896724 | -0.00116 | 0.969793 |
| MEGF6   | 0.763945 | -0.02581 | 0.899242 |
| LRP4    | 0.581954 | -0.02437 | 0.798127 |
| ATP9A   | 0.79444  | -0.12545 | 0.913708 |
| LDB3    | 0.201508 | -0.85778 | 0.49489  |
| N4BP1   | 0.971054 | 0.25031  | 0.997592 |
| ROCK2   | 0.61848  | 0.101403 | 0.822194 |
| CLASP2  | 0.084548 | 0.556185 | 0.335025 |
| PTCD1   | 0.457123 | 0.446749 | 0.715224 |
| COBL    | 0.231217 | -0.59083 | 0.531962 |
| CPNE3   | 0.729121 | -0.12061 | 0.879656 |
| DEPDC5  | 0.627472 | 0.290894 | 0.828932 |
| ATG13   | 0.204196 | 0.910563 | 0.497963 |
| ICOSLG  | 0.066061 | 0.970632 | 0.300455 |
| HIP1R   | 0.466082 | -0.18274 | 0.721065 |
| OBSL1   | 0.057916 | 0.82156  | 0.280499 |
| RNF40   | 0.434427 | 0.365905 | 0.698194 |
| PHF2    | 0.501832 | 0.15665  | 0.747291 |



|          |          |          |          |
|----------|----------|----------|----------|
| ZC3H11A  | 0.12513  | 0.610253 | 0.401334 |
| CLUH     | 0.1882   | 0.457682 | 0.480067 |
| CAND2    | 0.505015 | 0.293934 | 0.749514 |
| TSC22D2  | 0.258333 | 0.684573 | 0.560808 |
| NPHP4    | 0.210617 | -0.23133 | 0.506604 |
| KDM4A    | 0.018308 | 1.003702 | 0.163766 |
| DNAJC13  | 0.001008 | 0.383423 | 0.030643 |
| PHACTR2  | 0.808416 | 0.273424 | 0.921586 |
| PPP6R2   | 0.324076 | 0.308126 | 0.614309 |
| ADAMTS4  | 0.000645 | 2.665785 | 0.023592 |
| CNOT3    | 0.003904 | 0.818786 | 0.071121 |
| SS18L1   | 0.197201 | -1.02049 | 0.490309 |
| ANKRD17  | 0.010382 | 1.044248 | 0.123374 |
| SIN3B    | 0.052577 | 0.983313 | 0.268973 |
| ATP2C2   | 0.216819 | -0.65481 | 0.513662 |
| DNAJB6   | 0.430547 | 0.77477  | 0.695651 |
| XYLB     | 0.017236 | 1.634543 | 0.158939 |
| PEX11A   | 0.589979 | -0.30688 | 0.804875 |
| LRP5     | 0.221359 | 0.480101 | 0.519377 |
| TMEM127  | 0.472922 | 0.245363 | 0.727018 |
| COQ9     | 0.082198 | -0.31194 | 0.330671 |
| GGCT     | 0.734083 | -0.06784 | 0.882858 |
| NDUFS7   | 0.45805  | 0.08324  | 0.715224 |
| RTN2     | 0.013356 | 1.614845 | 0.141484 |
| NDUFS2   | 0.108241 | 0.21311  | 0.374055 |
| UGT2B11  | 0.300882 | 0.26458  | 0.602797 |
| ZPR1     | 0.371443 | 0.405432 | 0.65423  |
| USP12    | 0.5073   | -0.2771  | 0.75153  |
| DUSP11   | 0.033976 | 1.20215  | 0.221145 |
| GBAS     | 0.794443 | -0.02074 | 0.913708 |
| SEMA7A   | 0.002889 | 1.298559 | 0.061037 |
| HMMR     | 0.128993 | 1.302515 | 0.409111 |
| CILP     | 1.69E-08 | 4.880654 | 6.25E-06 |
| PDCD6    | 0.520146 | 0.059982 | 0.760272 |
| TBCA     | 0.61848  | -0.10269 | 0.822194 |
| ATP6V1G1 | 0.749036 | -0.02915 | 0.890902 |
| VPS4B    | 0.308157 | 0.12362  | 0.609277 |
| MPDU1    | 0.0799   | 0.382938 | 0.325919 |
| ENTPD6   | 0.021149 | 1.3754   | 0.173882 |
| ENTPD3   | 0.411372 | 0.421644 | 0.683152 |
| ENTPD5   | 0.891226 | -0.02631 | 0.966699 |
| ZNF217   | 0.015511 | 1.077821 | 0.15278  |
| BCAS1    | 0.905133 | -0.25223 | 0.972966 |
| PTP4A3   | 0.606873 | 0.178616 | 0.815541 |
| AVIL     | 0.047645 | 0.671866 | 0.256521 |
| H2AFY    | 0.173168 | -0.18352 | 0.464476 |
| SH3BGRL  | 0.515876 | 0.073855 | 0.757825 |
| FLNB     | 0.197211 | 0.10751  | 0.490309 |
| NCOR1    | 0.340302 | 0.444703 | 0.627258 |
| VAMP4    | 0.014171 | 1.033792 | 0.145123 |
| NDUFS6   | 0.641914 | 0.016561 | 0.835764 |
| PEX14    | 0.72417  | 0.088894 | 0.876654 |
| TRIM3    | 0.033947 | 0.831902 | 0.221141 |
| ULK1     | 0.262147 | 0.237536 | 0.565636 |
| TULP3    | 0.073475 | 0.766518 | 0.316346 |
| SLC43A1  | 0.622736 | -0.28123 | 0.825978 |
| CS       | 0.892438 | 0.014102 | 0.966699 |
| SPAG7    | 0.768774 | -0.45285 | 0.901915 |

|          |          |          |          |
|----------|----------|----------|----------|
| MRPL33   | 0.872945 | -0.31184 | 0.956872 |
| SEC22B   | 0.213733 | 0.198984 | 0.509228 |
| DEAF1    | 0.729045 | 0.149956 | 0.879656 |
| PRPF40A  | 0.131757 | 0.197901 | 0.413476 |
| TACC1    | 0.009264 | 0.581628 | 0.116462 |
| NME6     | 0.646168 | -0.29532 | 0.837353 |
| CDC45    | 0.385801 | 0.664544 | 0.664326 |
| GIGYF1   | 0.062711 | 1.108139 | 0.292924 |
| MOSPD3   | 0.09909  | -0.48146 | 0.358568 |
| LRCH4    | 0.774166 | -0.05106 | 0.903913 |
| MTX2     | 0.72417  | -0.00202 | 0.876654 |
| VPS26A   | 0.244338 | 0.18561  | 0.547425 |
| NDUFB1   | 0.289748 | 0.116943 | 0.593134 |
| PMPCB    | 0.680152 | -0.06885 | 0.85545  |
| SAP30    | 1        | -0.06621 | 1        |
| MED24    | 0.217399 | 0.281783 | 0.514768 |
| KATNA1   | 0.24217  | 0.976307 | 0.545141 |
| RDH16    | 0.050224 | -0.70801 | 0.263221 |
| ERN1     | 0.720872 | 0.22126  | 0.876089 |
| CRLF1    | 0.53582  | -0.40702 | 0.773095 |
| LGR5     | 0.178261 | 0.258354 | 0.469506 |
| PSIP1    | 0.729121 | 0.104732 | 0.879656 |
| ERLIN1   | 0.515876 | 0.204681 | 0.757825 |
| TADA2A   | 0.041397 | 0.402976 | 0.240826 |
| SUPT3H   | 0.010713 | 1.361852 | 0.125864 |
| GPC4     | 0.069183 | 0.560343 | 0.306571 |
| NDUFS3   | 0.35064  | 0.142921 | 0.635657 |
| CA11     | 0.746543 | -0.11661 | 0.889644 |
| SRSF10   | 0.272095 | 0.190206 | 0.575039 |
| CLN5     | 0.255193 | -0.18162 | 0.557593 |
| HSBP1    | 0.001272 | 0.641311 | 0.034924 |
| TNFRSF21 | 0.710459 | -0.00676 | 0.870109 |
| ECI2     | 0.059675 | -0.34966 | 0.285693 |
| KHDRBS3  | 0.432742 | 0.794089 | 0.697709 |
| TADA3    | 0.076472 | 1.03456  | 0.322705 |
| TAF5L    | 0.980873 | 0.056617 | 1        |
| EED      | 0.498013 | -0.03422 | 0.744803 |
| BANF1    | 0.016204 | -0.28102 | 0.154611 |
| SF3B1    | 0.097132 | 0.209745 | 0.354489 |
| CSDE1    | 0.411524 | 0.126933 | 0.683152 |
| WBP4     | 0.317391 | 0.615955 | 0.613139 |
| STX11    | 0.586298 | 0.044177 | 0.801141 |
| SKAP2    | 0.396189 | 0.790325 | 0.67382  |
| PRKRA    | 0.97106  | -0.06733 | 0.997592 |
| MTRF1    | 0.718667 | 0.205275 | 0.874478 |
| CRCP     | 0.670702 | 0.166462 | 0.850681 |
| ITGA10   | 0.949005 | 0.055186 | 0.990863 |
| RPS6KA5  | 0.330298 | 0.226452 | 0.619341 |
| MED6     | 0.034175 | 1.315494 | 0.221721 |
| MYCBP2   | 0.396661 | 0.07752  | 0.67382  |
| PGLYRP1  | 0.884537 | -0.52814 | 0.963599 |
| GCAT     | 0.548032 | -0.39488 | 0.780059 |
| SPAG6    | 0.995583 | -0.04885 | 1        |
| NPM3     | 0.025549 | 0.981977 | 0.193268 |
| LYPLA1   | 0.955289 | -0.0985  | 0.993074 |
| ERAL1    | 0.277156 | 0.373096 | 0.579677 |
| REM1     | 0.768139 | -0.01827 | 0.901915 |
| CREG1    | 0.048136 | 1.738373 | 0.257798 |

|          |          |          |          |
|----------|----------|----------|----------|
| SERPINB7 | 0.602618 | 0.310835 | 0.8126   |
| FCN3     | 0.956176 | 0.319331 | 0.99381  |
| SNRNP200 | 0.031791 | 0.279154 | 0.214212 |
| TRMU     | 0.526332 | -0.39589 | 0.765982 |
| TIPRL    | 0.00719  | 0.483943 | 0.101457 |
| OFD1     | 0.635785 | -0.3479  | 0.833511 |
| TOM1L1   | 0.198683 | -0.98137 | 0.49217  |
| RPS6KA4  | 0.011202 | 0.71339  | 0.128397 |
| SURF6    | 0.895412 | 0.284221 | 0.969069 |
| PPM1B    | 0.247021 | -0.22314 | 0.549922 |
| ADAP1    | 0.083377 | 0.949515 | 0.332962 |
| UTP20    | 0.415291 | 0.26389  | 0.686028 |
| NUP155   | 0.073319 | 0.223063 | 0.31592  |
| RP2      | 0.764084 | 0.012456 | 0.899242 |
| GJB3     | 0.57907  | -0.10514 | 0.796675 |
| STK16    | 0.555709 | 0.457602 | 0.783439 |
| WDHD1    | 0.015127 | 1.553504 | 0.150467 |
| CRTAP    | 2.58E-10 | 1.328131 | 4.08E-07 |
| SLC25A12 | 0.005656 | 0.453706 | 0.088608 |
| PIK3C2G  | 0.666736 | 0.174866 | 0.848351 |
| SLC22A3  | 0.464421 | -0.62723 | 0.721065 |
| B3GALNT1 | 0.038481 | 0.901964 | 0.235279 |
| TCEA3    | 0.083234 | -0.99072 | 0.332962 |
| PALM     | 0.923792 | 0.438038 | 0.980751 |
| ATP6AP2  | 0.330591 | 0.302705 | 0.619341 |
| GRAP2    | 0.614909 | -0.5164  | 0.820298 |
| RNASEH2A | 0.601849 | 0.592536 | 0.81176  |
| CDC123   | 0.216839 | 0.622569 | 0.513662 |
| UGT2B17  | 0.331588 | -0.18105 | 0.619341 |
| CAPN15   | 0.118817 | 0.442322 | 0.392434 |
| BCAR3    | 0.183026 | 0.534949 | 0.474175 |
| POP7     | 0.350846 | 0.402224 | 0.635927 |
| RPP40    | 0.05702  | 0.675064 | 0.278658 |
| EIF3G    | 0.699592 | 0.015948 | 0.864146 |
| EIF3J    | 0.067188 | 0.317869 | 0.302058 |
| CBR3     | 0.239034 | -0.18032 | 0.541047 |
| LECT1    | 0.179677 | 0.689168 | 0.471223 |
| PSMD10   | 0.503174 | 0.177344 | 0.747596 |
| UPK1B    | 0.310183 | 0.344883 | 0.609864 |
| AP1G2    | 0.581788 | -0.04492 | 0.797998 |
| ZMPSTE24 | 0.026447 | 0.487186 | 0.195939 |
| PPP1R37  | 0.503037 | 0.332763 | 0.747596 |
| CEACAM4  | 0.08528  | -0.41395 | 0.335537 |
| IDH1     | 0.078771 | -0.19919 | 0.32578  |
| GATB     | 0.43761  | 0.115902 | 0.701933 |
| SCO1     | 0.364413 | -0.22004 | 0.646996 |
| CYP7B1   | 0.061485 | 0.593731 | 0.289565 |
| ATRN     | 0.038006 | 0.916326 | 0.233324 |
| RBBP9    | 0.706933 | -0.2035  | 0.869179 |
| STAM2    | 0.009812 | 0.367294 | 0.119724 |
| TNFSF13  | 0.494367 | 0.291184 | 0.741997 |
| ALDH1L1  | 0.058956 | 0.941067 | 0.283643 |
| TUSC2    | 0.562547 | -0.30761 | 0.789479 |
| SULT1C4  | 0.571349 | 0.083634 | 0.793891 |
| MMP23A   | 0.304619 | 0.767856 | 0.606083 |
| DGAT1    | 0.734069 | 0.27719  | 0.882858 |
| CCNK     | 0.001133 | 1.006208 | 0.032731 |
| DHRS3    | 0.430489 | -0.21601 | 0.695651 |

|         |          |          |          |
|---------|----------|----------|----------|
| ARL6IP5 | 0.043893 | 0.306012 | 0.247494 |
| DYSF    | 0.866426 | -0.00032 | 0.953042 |
| PIAS1   | 0.036623 | 1.290234 | 0.229485 |
| BCAS2   | 0.308157 | 0.239197 | 0.609277 |
| DCTN3   | 0.192667 | 0.033875 | 0.486094 |
| BBOX1   | 0.319672 | -0.21336 | 0.613139 |
| DNAJC8  | 0.774166 | 0.127842 | 0.903913 |
| SMNDC1  | 0.050885 | 0.418764 | 0.264901 |
| RAD17   | 0.91353  | -0.00409 | 0.975822 |
| ATP5H   | 0.340521 | -0.05919 | 0.627258 |
| DNAJB5  | 0.126551 | 0.460666 | 0.403998 |
| TSPAN9  | 0.858616 | -0.16232 | 0.949134 |
| FLOT1   | 0.016799 | -0.2332  | 0.156698 |
| TRIO    | 0.002385 | 0.693144 | 0.053103 |
| ATP5L   | 0.609213 | -0.04678 | 0.816529 |
| MPDZ    | 0.024558 | 1.21845  | 0.189804 |
| CPD     | 0.056188 | 0.442927 | 0.276683 |
| SASH3   | 0.726643 | 0.084511 | 0.878483 |
| GLRX3   | 0.010589 | 0.549979 | 0.124802 |
| KRT36   | 0.319672 | 0.186658 | 0.613139 |
| RSL1D1  | 0.651389 | -0.14856 | 0.839222 |
| WFS1    | 0.316049 | 0.214135 | 0.613139 |
| ANXA9   | 0.344056 | -0.68013 | 0.630315 |
| CLPX    | 0.651389 | 0.222372 | 0.839222 |
| SCGN    | 0.421207 | -0.31018 | 0.691066 |
| NEBL    | 0.018882 | -0.81294 | 0.166597 |
| SEC14L2 | 0.056538 | 1.8898   | 0.277829 |
| STC2    | 0.849305 | 0.255545 | 0.944945 |
| TM7SF2  | 0.060238 | -1.77455 | 0.287134 |
| SNCG    | 0.889133 | 0.605923 | 0.96576  |
| CIAO1   | 0.199513 | 0.184774 | 0.49217  |
| PDE5A   | 0.343366 | -0.4689  | 0.630156 |
| DFFB    | 0.907303 | -0.05335 | 0.9734   |
| WISP2   | 0.383711 | 1.171346 | 0.663509 |
| ZFAND5  | 0.504761 | 0.339927 | 0.749338 |
| SRP72   | 0.249724 | 0.162982 | 0.552833 |
| DXO     | 0.46818  | 0.190111 | 0.722799 |
| TRPM2   | 0.320828 | 0.497198 | 0.613139 |
| DDAH1   | 0.005889 | -0.83916 | 0.089865 |
| RECQL4  | 0.054852 | 0.318463 | 0.274162 |
| RECQL5  | 0.40369  | 0.632629 | 0.678271 |
| URI1    | 0.141805 | 0.806216 | 0.428816 |
| B3GAT3  | 0.24165  | 0.457083 | 0.544139 |
| STK17B  | 0.021982 | 1.328091 | 0.177307 |
| ECM2    | 1.40E-06 | 3.189353 | 0.000194 |
| LY6H    | 1        | 0.002188 | 1        |
| MTA2    | 0.012773 | 0.301239 | 0.137944 |
| ALDH1A2 | 0.04791  | 1.03457  | 0.257569 |
| STK10   | 0.699592 | -0.00135 | 0.864146 |
| PRKD3   | 0.15102  | 0.776849 | 0.44125  |
| GFPT2   | 0.014667 | 1.757077 | 0.148149 |
| TPPP    | 0.234778 | -0.85587 | 0.536782 |
| SLIT2   | 0.075598 | 0.77802  | 0.32039  |
| KBTBD11 | 0.705956 | -0.17408 | 0.868525 |
| LTN1    | 0.030754 | 0.766998 | 0.211475 |
| ATP10B  | 0.640002 | -0.31903 | 0.835224 |
| TOMM70A | 0.017412 | 0.285241 | 0.159467 |
| IPO13   | 0.000897 | 2.049242 | 0.028766 |

|          |          |          |          |
|----------|----------|----------|----------|
| DDHD2    | 0.024168 | 1.398294 | 0.188238 |
| MYO1D    | 0.102567 | 0.344621 | 0.364372 |
| TOX4     | 0.422171 | 0.48352  | 0.691467 |
| MICAL2   | 0.00187  | 0.81783  | 0.045694 |
| KIAA0754 | 0.09909  | 0.286197 | 0.358568 |
| SEC24D   | 1.14E-05 | 0.63896  | 0.001067 |
| NFASC    | 0.072874 | -0.88108 | 0.315444 |
| SUPT7L   | 0.182865 | 0.729534 | 0.474175 |
| FCHSD2   | 0.174952 | 0.539083 | 0.466796 |
| UFL1     | 0.12841  | 0.205676 | 0.407846 |
| SORBS2   | 0.856059 | 0.175009 | 0.946993 |
| TMCC1    | 0.002688 | 1.620083 | 0.057778 |
| PHF14    | 0.036226 | 0.783452 | 0.227448 |
| SASH1    | 0.132125 | 0.79893  | 0.414307 |
| TMEM63A  | 0.081043 | -0.48265 | 0.328405 |
| FARP2    | 0.699462 | 0.001077 | 0.864146 |
| UBXN7    | 0.193795 | 0.413727 | 0.488273 |
| SUN1     | 0.997369 | 0.037769 | 1        |
| PROSC    | 0.680152 | 0.054295 | 0.85545  |
| ERLIN2   | 0.550543 | 0.084428 | 0.781327 |
| PRPF6    | 0.173168 | 0.213783 | 0.464476 |
| DKK1     | 0.310183 | 0.270727 | 0.609864 |
| ABCA8    | 0.007698 | -1.64641 | 0.105935 |
| PCF11    | 0.550229 | 0.424318 | 0.781327 |
| FRYL     | 0.364426 | 0.300505 | 0.646996 |
| NFAT5    | 0.974406 | 0.115225 | 0.998921 |
| ENDOD1   | 0.572777 | -0.02193 | 0.794481 |
| CDK14    | 0.005306 | 1.282801 | 0.086166 |
| GLCE     | 0.403018 | -0.35582 | 0.678271 |
| GLS      | 0.804634 | 0.0668   | 0.918848 |
| HAUS5    | 0.708113 | -0.1784  | 0.869179 |
| ABLIM3   | 0.661762 | -0.20167 | 0.844895 |
| FBXO21   | 0.147601 | 0.936191 | 0.436386 |
| KDM4B    | 0.157405 | 0.572049 | 0.447293 |
| RHOBTB3  | 0.060497 | 0.669913 | 0.287134 |
| SLCO2B1  | 0.052499 | 1.080799 | 0.268947 |
| SOGA1    | 0.118516 | 0.689705 | 0.392409 |
| USP19    | 0.151364 | 0.386084 | 0.44125  |
| WDR47    | 0.146282 | 0.815564 | 0.435196 |
| TRIM37   | 0.749046 | 0.009881 | 0.890902 |
| AP2A2    | 0.568296 | 0.074616 | 0.791838 |
| SEC31A   | 0.006775 | 0.266843 | 0.098484 |
| CLSTN1   | 0.001967 | 2.031839 | 0.047009 |
| CEP152   | 0.128538 | 0.445375 | 0.408017 |
| FAM13A   | 0.991426 | 0.01243  | 1        |
| ARHGEF15 | 0.168344 | -0.73219 | 0.459086 |
| HEXIM1   | 0.036826 | 0.633674 | 0.229759 |
| TJP3     | 0.002491 | -1.18842 | 0.054809 |
| INMT     | 0.647731 | 0.268916 | 0.838174 |
| RPP14    | 0.096858 | 0.922944 | 0.354489 |
| CCNB2    | 0.545822 | -0.04291 | 0.778738 |
| YIF1A    | 0.131753 | 0.444173 | 0.413476 |
| UBR5     | 0.052873 | 0.609505 | 0.269122 |
| AGFG2    | 0.491774 | -0.32837 | 0.739862 |
| PRSS23   | 0.040727 | 1.603846 | 0.240826 |
| SCAF4    | 0.272095 | 0.183807 | 0.575039 |
| S1PR2    | 0.668509 | -0.34082 | 0.849597 |
| NDUFB6   | 0.887225 | 0.25325  | 0.96416  |

|                      |          |          |          |
|----------------------|----------|----------|----------|
| MFN2                 | 0.845718 | -0.05254 | 0.942239 |
| DUSP14               | 0.897443 | 0.100127 | 0.969793 |
| SNUPN                | 0.195986 | 0.720909 | 0.490309 |
| AKR7A3               | 0.739224 | 0.142108 | 0.886253 |
| UBE4B                | 0.011851 | 0.9244   | 0.13136  |
| ZFPL1                | 0.498977 | -0.19633 | 0.744839 |
| IKBKAP               | 0.277896 | 0.189964 | 0.579677 |
| UBL3                 | 0.292597 | -0.98725 | 0.595788 |
| GABARAP              | 0.511368 | -0.78741 | 0.754376 |
| NDUFA3               | 0.170026 | 0.349645 | 0.461404 |
| NDUFB4               | 0.939534 | 0.04353  | 0.986498 |
| NDUFB8               | 0.241676 | 0.261697 | 0.544139 |
| SCEL                 | 0.300647 | -0.7372  | 0.602797 |
| NDUFA7               | 0.289748 | -0.30617 | 0.593134 |
| VAMP5                | 0.694617 | -0.14697 | 0.861478 |
| RTN3                 | 0.09982  | 0.245811 | 0.359216 |
| KLHL2                | 0.995826 | -0.06436 | 1        |
| RCBTB2               | 0.267796 | 0.612937 | 0.570195 |
| LETM1                | 0.680152 | -0.03973 | 0.85545  |
| EPN2                 | 0.124024 | 0.616638 | 0.400153 |
| STBD1                | 0.078725 | -0.62427 | 0.32578  |
| LEPROTL1             | 0.209546 | 0.893468 | 0.504466 |
| ZRANB2               | 0.143873 | 0.81757  | 0.431666 |
| SNX4                 | 0.030755 | 0.360007 | 0.211475 |
| ZWINT                | 0.023553 | 0.963751 | 0.185053 |
| LUC7L3               | 0.007932 | 0.482639 | 0.107292 |
| KIF20A               | 0.200849 | 0.660416 | 0.494233 |
| APOL3                | 0.908098 | -0.51168 | 0.9734   |
| KIF4A                | 0.215185 | 0.757593 | 0.511491 |
| MBD4                 | 0.75311  | 0.197024 | 0.894106 |
| SBF1                 | 0.023065 | 0.411944 | 0.182986 |
| GOSR1                | 0.38573  | 0.217186 | 0.664306 |
| KAT7                 | 0.311297 | 0.475502 | 0.609894 |
| ABCC6                | 0.001344 | -1.26747 | 0.036363 |
| SLC25A14             | 0.006623 | 1.103358 | 0.097053 |
| ATE1                 | 0.166751 | 0.83965  | 0.457139 |
| CCNDBP1              | 0.528487 | 0.37473  | 0.767576 |
| LYPD3                | 0.104977 | 0.89267  | 0.369266 |
| EPM2A                | 0.716156 | -0.17293 | 0.873229 |
| KCNK5                | 0.051597 | 1.140765 | 0.266309 |
| VAPB                 | 0.72417  | 0.093592 | 0.876654 |
| RASAL1               | 0.818809 | -0.25623 | 0.92687  |
| SNAPIN               | 0.354055 | 0.144854 | 0.638094 |
| MPZL1                | 0.018368 | 0.849416 | 0.163766 |
| NDUFC2;NDUFC2-KCTD14 | 0.632492 | 0.010962 | 0.830965 |
| NDUFA10              | 0.179497 | 0.221422 | 0.471072 |
| FKBP9                | 5.18E-08 | 0.921739 | 1.47E-05 |
| CELF2                | 0.117214 | -0.53373 | 0.389929 |
| PGLS                 | 0.840557 | -0.00473 | 0.939212 |
| PAPSS2               | 0.840557 | -0.00702 | 0.939212 |
| ABCB11               | 0.27825  | 0.439113 | 0.580198 |
| SMC2                 | 0.041403 | 1.332182 | 0.240826 |
| ATG7                 | 0.689846 | 0.174393 | 0.859429 |
| TACC2                | 0.552736 | -0.10049 | 0.783393 |
| TRIM16               | 0.076118 | 1.313801 | 0.321815 |
| FARS2                | 0.616076 | 0.664541 | 0.821456 |
| ZBTB7A               | 0.507781 | 0.316144 | 0.75191  |
| LYPLA2               | 0.474191 | -0.12412 | 0.727018 |

|          |          |          |          |
|----------|----------|----------|----------|
| IPO7     | 0.524435 | 0.037248 | 0.764023 |
| ARIH2    | 0.156972 | 0.913694 | 0.447022 |
| TNFAIP8  | 0.675324 | 0.108441 | 0.853175 |
| MAP3K6   | 0.013369 | 1.04791  | 0.141488 |
| WISP1    | 0.080614 | 0.726583 | 0.327865 |
| WISP3    | 1        | -0.00319 | 1        |
| GDF11    | 0.993518 | 0.019232 | 1        |
| SLU7     | 0.005486 | 1.757406 | 0.087298 |
| PGM3     | 0.003027 | 0.680629 | 0.062294 |
| GCNT3    | 0.816233 | 0.058975 | 0.926122 |
| MOCS3    | 0.057896 | 0.883835 | 0.280499 |
| RAPGEF3  | 0.045425 | 0.584794 | 0.250872 |
| CD2BP2   | 0.037428 | 0.475374 | 0.231646 |
| MED26    | 0.771591 | 0.114057 | 0.903336 |
| ZFYVE9   | 0.65654  | -0.06601 | 0.842398 |
| CNIH1    | 0.23975  | 1.323011 | 0.542335 |
| TNFRSF6B | 0.000137 | 2.766521 | 0.007999 |
| BRI3     | 0.087124 | -1.24618 | 0.3381   |
| SVIL     | 5.09E-07 | 0.805304 | 8.68E-05 |
| PIGN     | 0.145945 | 0.930384 | 0.434427 |
| PAPLN    | 0.027806 | -0.9128  | 0.202072 |
| BAG4     | 0.028605 | 1.621727 | 0.204681 |
| AHSA1    | 0.192667 | 0.285775 | 0.486094 |
| SLC34A2  | 0.077094 | -0.93381 | 0.324464 |
| APOM     | 0.85408  | 0.883591 | 0.946993 |
| ADAMTS2  | 0.048372 | 0.845487 | 0.258191 |
| PARN     | 0.305035 | 0.484105 | 0.606083 |
| PSMG1    | 0.088785 | 0.721914 | 0.34076  |
| FMNL1    | 0.05451  | 0.294055 | 0.273313 |
| SGPL1    | 0.09982  | 0.271037 | 0.359216 |
| CLDN7    | 0.757531 | 0.359893 | 0.896847 |
| CTDNEP1  | 0.915959 | -0.16537 | 0.977664 |
| ABCA1    | 0.350349 | 0.447954 | 0.635657 |
| NSA2     | 0.663952 | 0.306572 | 0.847289 |
| H6PD     | 0.586319 | -0.12704 | 0.801141 |
| SEC24A   | 0.000423 | 0.684046 | 0.018305 |
| SEC24B   | 0.013753 | 0.284696 | 0.143228 |
| LPHN2    | 0.411659 | -0.60717 | 0.683152 |
| VNN1     | 0.927729 | 0.038811 | 0.983115 |
| VNN2     | 0.319599 | 0.643412 | 0.613139 |
| CBX6     | 0.944302 | 0.005006 | 0.988547 |
| SLC2A10  | 0.003581 | 1.857567 | 0.068752 |
| NADK     | 0.944728 | -0.0402  | 0.988547 |
| TDP2     | 0.415634 | 0.527058 | 0.686287 |
| SFT2D2   | 0.396926 | 1.064962 | 0.674166 |
| MPC2     | 0.913333 | 0.282355 | 0.975706 |
| METTTL18 | 0.118773 | 0.770465 | 0.392409 |
| ETHE1    | 0.026447 | 0.276723 | 0.195939 |
| ACSL3    | 0.61848  | 0.131594 | 0.822194 |
| POLR1A   | 0.0799   | 0.468095 | 0.325919 |
| PCNT     | 0.32407  | 0.330874 | 0.614309 |
| YEATS4   | 0.397243 | 0.620123 | 0.674601 |
| ZBTB11   | 0.442234 | 0.254551 | 0.703704 |
| CNOT4    | 0.344304 | 0.54423  | 0.630561 |
| STAMPB   | 0.486499 | 0.142406 | 0.73612  |
| NTN1     | 0.312494 | 0.232755 | 0.610732 |
| FSTL3    | 0.102296 | 1.004561 | 0.364372 |
| CPSF4    | 0.213721 | 0.375182 | 0.509228 |

|          |          |          |          |
|----------|----------|----------|----------|
| NFATC1   | 0.009592 | 1.083611 | 0.118893 |
| ASMTL    | 0.939534 | 0.117289 | 0.986498 |
| CDS2     | 0.876815 | -0.12542 | 0.958859 |
| KRT75    | 0.772113 | 0.160532 | 0.903705 |
| FGFR1OP  | 0.091853 | 1.232761 | 0.345626 |
| PPP1R3D  | 0.938518 | -0.06054 | 0.986498 |
| BRD1     | 0.777261 | 0.246072 | 0.906372 |
| POP4     | 0.480247 | 0.486199 | 0.732554 |
| LY86     | 0.319672 | 0.331787 | 0.613139 |
| HERC2    | 0.016333 | 0.90237  | 0.155231 |
| CXCL14   | 0.037731 | 1.558694 | 0.233134 |
| RAB3D    | 0.103963 | -0.3682  | 0.366863 |
| SNAP29   | 0.378546 | 0.03484  | 0.659304 |
| OXSR1    | 0.006511 | 0.319261 | 0.096023 |
| GGPS1    | 0.699526 | -0.02596 | 0.864146 |
| RAB36    | 0.861609 | -0.16752 | 0.950384 |
| HSPA4L   | 0.315327 | -0.50872 | 0.613139 |
| PTBP3    | 0.003744 | 0.40631  | 0.070138 |
| TBC1D8   | 0.771016 | -0.19266 | 0.903336 |
| IL33     | 0.649527 | -0.35208 | 0.839222 |
| STARD3NL | 0.484646 | -0.82119 | 0.735121 |
| LSM8     | 0.794443 | 0.054643 | 0.913708 |
| AP2A1    | 7.16E-07 | 0.448667 | 0.000115 |
| WIZ      | 0.035045 | 1.012446 | 0.223337 |
| DDX58    | 0.046732 | 0.587516 | 0.254194 |
| STAU1    | 0.060574 | 0.383488 | 0.287134 |
| TTC4     | 0.760437 | 0.430247 | 0.89779  |
| TMEM50A  | 0.835153 | -0.44735 | 0.935999 |
| SDPR     | 0.025563 | -0.87121 | 0.193268 |
| BAG2     | 0.392997 | 0.192327 | 0.671013 |
| BAG3     | 0.028771 | 0.492974 | 0.204946 |
| MAP4K4   | 0.000305 | 0.990277 | 0.014375 |
| MLYCD    | 0.819984 | -0.03844 | 0.92687  |
| CRYZL1   | 0.724169 | 0.19545  | 0.876654 |
| AIFM1    | 0.272095 | -0.16264 | 0.575039 |
| CLDN1    | 0.163587 | 0.674966 | 0.453012 |
| CLIC3    | 0.050086 | -0.94069 | 0.26298  |
| EML2     | 0.206534 | -0.33851 | 0.500256 |
| LATS1    | 0.62289  | 0.147595 | 0.825978 |
| GNA14    | 0.294675 | 0.81296  | 0.597922 |
| ANGPTL1  | 0.40269  | -0.36419 | 0.678038 |
| NUDT14   | 0.925424 | 0.150799 | 0.981917 |
| TSPAN13  | 0.749023 | -0.55105 | 0.890902 |
| TSPAN15  | 0.814832 | 0.236541 | 0.924847 |
| BPNT1    | 0.554955 | 0.140382 | 0.783439 |
| FADS2    | 0.026262 | 1.479022 | 0.195353 |
| DDAH2    | 0.918567 | 0.041765 | 0.978657 |
| G6B      | 0.57907  | -0.15175 | 0.796675 |
| ABHD16A  | 0.986843 | 0.007234 | 1        |
| GPANK1   | 0.706688 | 0.248142 | 0.869179 |
| C6orf47  | 0.959816 | 0.219916 | 0.994122 |
| TXNDC12  | 0.43056  | -0.12259 | 0.695651 |
| OLFM2    | 0.571349 | 0.068217 | 0.793891 |
| TRUB2    | 0.430496 | 0.343267 | 0.695651 |
| ECD      | 0.856848 | 0.057848 | 0.947771 |
| SYF2     | 0.635785 | 0.110897 | 0.833511 |
| CBX7     | 0.146545 | -0.83458 | 0.435629 |
| TBX6     |          | 0        |          |



|         |          |          |          |
|---------|----------|----------|----------|
| ITGBL1  | 9.26E-08 | 3.767958 | 2.25E-05 |
| EFEMP2  | 1.21E-05 | 1.079171 | 0.001115 |
| IGSF6   | 0.309054 | 0.767153 | 0.609864 |
| RECK    | 0.307997 | 0.61022  | 0.609277 |
| MBD3    | 0.020417 | 1.070912 | 0.170514 |
| TOP3B   | 0.079547 | 1.018688 | 0.325919 |
| NUDT3   | 0.522249 | -0.16746 | 0.762942 |
| FAM107A |          | 0        |          |
| AGR2    | 0.280828 | -0.32994 | 0.583434 |
| GAS8    | 0.756763 | -0.14417 | 0.896333 |
| BCL10   | 0.011376 | 1.625739 | 0.128971 |
| NDUFB10 | 0.779221 | -0.0094  | 0.906856 |
| CLPTM1  | 0.897655 | 0.152639 | 0.969793 |
| ZBED1   | 0.597759 | 0.305949 | 0.808505 |
| MOCS2   | 0.805268 | 0.346532 | 0.919418 |
| TOMM40  | 0.101186 | 0.291285 | 0.361901 |
| NAPSA   | 0.177364 | -0.56559 | 0.468602 |
| PEX11B  | 0.54177  | 0.119481 | 0.775521 |
| PAK4    | 0.699548 | -0.04936 | 0.864146 |
| WNT11   | 0.7956   | -0.16183 | 0.914405 |
| DNAL4   | 0.295394 | -0.53474 | 0.598344 |
| CHEK2   | 0.462316 | 0.48667  | 0.719051 |
| APBA3   | 0.004056 | 1.425641 | 0.072359 |
| ACTL6A  | 0.035653 | 0.261003 | 0.225452 |
| WHSC1   | 0.075662 | 0.701693 | 0.320537 |
| MOCS2   | 0.960048 | -0.24153 | 0.994122 |
| MT-CYB  | 0.758553 | 0.168253 | 0.896847 |
| CYB5A   | 0.005322 | -0.64285 | 0.086174 |
| ADH1B   | 0.016204 | -1.36075 | 0.154611 |
| ADH1C   | 0.4308   | -0.71689 | 0.69569  |
| LDHA    | 0.151386 | 0.335298 | 0.44125  |
| ALDH1A1 | 0.28378  | -0.30159 | 0.586874 |
| GLUD1   | 0.623137 | 0.060066 | 0.825978 |
| DHFR    | 0.298209 | 0.6737   | 0.601676 |
| CYB5R3  | 0.221112 | 0.175172 | 0.519064 |
| GSR     | 0.835403 | 0.070692 | 0.935999 |
| MT-CO1  | 0.55643  | 0.662274 | 0.783865 |
| MT-CO2  | 0.177368 | 0.230429 | 0.468602 |
| MT-CO3  | 0.246865 | 1.721121 | 0.549922 |
| PAH     | 0.637936 | -0.2305  | 0.834063 |
| SOD1    | 0.835403 | 0.017169 | 0.935999 |
| CP      | 0.171096 | 0.294566 | 0.461822 |
| F8      | 0.023451 | -0.9251  | 0.184845 |
| OTC     | 0.744555 | 0.039089 | 0.888419 |
| F13A1   | 0.076552 | 0.389791 | 0.322705 |
| PNP     | 0.067188 | 0.47885  | 0.302058 |
| HPRT1   | 0.201834 | 0.236992 | 0.495032 |
| GOT2    | 0.33388  | 0.249018 | 0.620902 |
| ABL1    | 0.034313 | 1.105197 | 0.222148 |
| EGFR    | 0.520146 | 0.240774 | 0.760272 |
| PGK1    | 0.269226 | 0.206654 | 0.571371 |
| AK1     | 0.061485 | -0.58636 | 0.289565 |
| F2      | 0.286754 | 0.265635 | 0.590053 |
| C1R     | 1.82E-06 | 1.245975 | 0.000243 |
| HP      | 0.871617 | 0.274425 | 0.956098 |
| HPR     | 0.05807  | 1.393449 | 0.281    |
| F9      | 0.759058 | -0.27187 | 0.896847 |
| F10     | 0.400084 | 0.608539 | 0.67622  |

|           |          |          |          |
|-----------|----------|----------|----------|
| CFD       | 0.121911 | 0.486289 | 0.397343 |
| PLG       | 0.524435 | 0.209763 | 0.764023 |
| F12       | 0.020417 | 1.227894 | 0.170514 |
| PLAU      | 0.000693 | 2.619645 | 0.024558 |
| PLAT      | 0.635765 | 0.845237 | 0.833511 |
| CFB       | 0.057044 | 0.448647 | 0.278658 |
| ADA       | 0.247021 | 0.439134 | 0.549922 |
| MT-ATP6   | 0.955288 | -0.57826 | 0.993074 |
| CA1       | 0.161013 | -0.67604 | 0.453012 |
| CA2       | 0.025563 | -0.81679 | 0.193268 |
| ASS1      | 0.067188 | -0.89403 | 0.302058 |
| OAS1      | 0.312831 | 0.895879 | 0.610954 |
| SPINK1    | 0.573862 | -0.42979 | 0.795688 |
| SERPINC1  | 0.929044 | -0.00489 | 0.983115 |
| SERPINA1  | 0.637197 | 0.072132 | 0.833511 |
| SERPINA3  | 0.269226 | 0.347386 | 0.571371 |
| AGT       | 0.255193 | 0.364412 | 0.557593 |
| A2M       | 0.45805  | 0.091694 | 0.715224 |
| C3        | 0.511623 | 0.080173 | 0.754376 |
| C5        | 0.059675 | 0.45234  | 0.285693 |
| TIMP1     | 0.018697 | 0.615849 | 0.165633 |
| CST3      | 0.049723 | -0.48526 | 0.261364 |
| CST4      | 0.331588 | -0.24259 | 0.619341 |
| CST1      | 0.062136 | 1.536956 | 0.291647 |
| CSTA      | 0.817472 | -0.07868 | 0.926863 |
| KNG1      | 0.354055 | 0.204069 | 0.638094 |
| FOS       | 0.331579 | -0.47225 | 0.619341 |
| NRAS      | 0.61158  | 0.560969 | 0.818417 |
| HRAS      | 0.266378 | 0.131931 | 0.568807 |
| KRAS      | 0.613839 | -0.21364 | 0.819264 |
| PDGFB     | 0.290313 | 0.349859 | 0.594164 |
| LDLR      | 0.92264  | 0.01914  | 0.980751 |
| TGFA      | 0.540968 | 0.180229 | 0.775521 |
| TGFB1     | 0.02023  | 1.131861 | 0.170367 |
| POMC      | 1        | -0.0803  | 1        |
| CALCA     | 0.992139 | -0.12922 | 1        |
| IGF2      | 0.168335 | 1.022577 | 0.459086 |
| IGJ       | 0.590866 | -0.22639 | 0.804875 |
| IGKV1-33  | 0.543955 | 0.22689  | 0.777449 |
| IGKV1-17  | 0.934009 | 0.176327 | 0.984157 |
| IGKV1D-16 | 0.125947 | 1.118433 | 0.403148 |
| IGKV1-5   | 0.901893 | -0.10369 | 0.971583 |
| IGKV3-20  | 0.632496 | 0.036059 | 0.830965 |
| IGKV3-15  | 0.115676 | 0.272945 | 0.387731 |
| IGLV1-44  | 0.488557 | 0.478855 | 0.738428 |
| IGLV1-47  | 0.009626 | 1.481622 | 0.118893 |
| IGLV1-51  | 0.870175 | 0.639276 | 0.956098 |
| IGLV1-40  | 0.670819 | 0.356633 | 0.850681 |
| IGLV2-11  | 0.881065 | 0.11255  | 0.961515 |
| IGLV3-19  | 0.660208 | -0.77511 | 0.844596 |
| IGLV3-1   | 0.281823 | 0.923702 | 0.58479  |
| IGLV3-25  | 0.773231 | 0.45184  | 0.903913 |
| IGLV3-27  | 0.009764 | -2.12732 | 0.119724 |
| IGLV6-57  | 0.750655 | -0.4242  | 0.892487 |
| CD4       | 0.944782 | -0.04219 | 0.988547 |
| CD8A      | 0.294358 | 0.421878 | 0.597496 |
| IGHV1-69  | 0.029203 | 0.777522 | 0.20681  |
| IGHV1-46  | 0.661349 | 0.488609 | 0.844736 |

|             |          |          |          |
|-------------|----------|----------|----------|
| IGHV3-11    | 0.322009 | 0.189721 | 0.613139 |
| IGHV3-48    | 0.681268 | 0.211195 | 0.856391 |
| IGHV3-23    | 0.008016 | 1.226438 | 0.107782 |
| IGHV3-13    | 0.228562 | 1.058352 | 0.528484 |
| IGHV3-66    | 0.992139 | -0.05717 | 1        |
| IGHV3-7     | 0.221112 | 0.246675 | 0.519064 |
| IGHV3-9     | 0.420966 | -0.04509 | 0.691066 |
| IGHV2-5     | 0.745933 | 0.371774 | 0.889299 |
| IGHV4-61    | 0.505268 | -0.1695  | 0.749689 |
| PIGR        | 0.098465 | -0.94618 | 0.357719 |
| IGKC        | 0.098436 | 0.244617 | 0.357719 |
| TRAC        | 0.410427 | 0.368759 | 0.683152 |
| TRBC1;TRBC2 | 0.058573 | 1.408721 | 0.282818 |
| IGHE        | 0.415253 | -0.47692 | 0.686028 |
| IGHG1       | 0.177368 | 0.197511 | 0.468602 |
| IGHG2       | 0.239034 | 0.330862 | 0.541047 |
| IGHG3       | 0.357491 | 0.20615  | 0.641472 |
| IGHG4       | 0.623137 | 0.169974 | 0.825978 |
| IGHM        | 0.277896 | 0.24431  | 0.579677 |
| IGHA1       | 0.986843 | -0.08891 | 1        |
| IGHA2       | 0.799534 | 0.088763 | 0.916173 |
| IGHD        | 0.1542   | -1.30718 | 0.444958 |
| HLA-B       | 0.068637 | -1.34172 | 0.305604 |
| HLA-A       | 0.645144 | -0.32264 | 0.837353 |
| HLA-A       | 0.913333 | 0.277606 | 0.975706 |
| HLA-DRA     | 0.382127 | -0.14715 | 0.661698 |
| HLA-DQA2    | 0.770826 | 0.377185 | 0.903336 |
| HLA-DQA1    | 0.634421 | -0.95808 | 0.832706 |
| HLA-DRB1    | 0.737243 | -0.03519 | 0.885602 |
| HLA-DRB1    | 0.980946 | -0.01339 | 1        |
| HLA-DQB1    | 0.520146 | -0.05905 | 0.760272 |
| HBZ         | 0.293533 | 0.44246  | 0.596247 |
| HBD         | 0.051278 | -0.69189 | 0.265139 |
| MB          | 0.566553 | -0.59    | 0.791838 |
| COL1A1      | 0.00146  | 0.828169 | 0.038912 |
| COL2A1      | 0.182465 | 0.442215 | 0.473679 |
| COL3A1      | 2.00E-05 | 1.643662 | 0.00171  |
| COL4A1      | 0.918567 | -0.03444 | 0.978657 |
| CRYAB       | 0.190424 | 0.383502 | 0.483515 |
| KRT14       | 0.064281 | 0.634586 | 0.296208 |
| KRT6A       | 0.016645 | 1.539671 | 0.156319 |
| LMNA        | 0.76912  | 0.058524 | 0.901915 |
| SPTA1       | 0.208913 | -0.71264 | 0.503054 |
| TNNC2       | 0.331588 | -0.11846 | 0.619341 |
| APOA1       | 0.67051  | 0.133239 | 0.850681 |
| APOE        | 0.077655 | 0.333803 | 0.324641 |
| APOA2       | 0.656149 | -0.09219 | 0.84209  |
| APOC1       | 0.627809 | 0.32517  | 0.828932 |
| APOC2       | 0.664556 | 1.379766 | 0.847351 |
| APOC3       | 0.12513  | 0.444599 | 0.401334 |
| FGA         | 0.442223 | -0.11848 | 0.703704 |
| FGB         | 0.960544 | -0.03204 | 0.994122 |
| FGG         | 0.744041 | -0.08707 | 0.888303 |
| MBP         | 0.690892 | -0.33672 | 0.860106 |
| GYPA        | 0.900251 | -0.1052  | 0.971583 |
| SLC4A1      | 0.194929 | -0.46742 | 0.488911 |
| CRP         | 0.497979 | 0.429448 | 0.744803 |
| APCS        | 0.44615  | 0.100734 | 0.706795 |

|           |          |          |          |
|-----------|----------|----------|----------|
| C1QA      | 0.175259 | 0.409619 | 0.466796 |
| C1QB      | 0.084549 | 0.434866 | 0.335025 |
| C1QC      | 0.1068   | 0.359574 | 0.371671 |
| C9        | 0.020421 | 0.536174 | 0.170514 |
| APOH      | 0.038652 | 0.400515 | 0.235412 |
| LRG1      | 0.083337 | 0.678059 | 0.332962 |
| FN1       | 4.59E-07 | 0.838513 | 7.95E-05 |
| RBP4      | 0.609209 | 0.349672 | 0.816529 |
| AMBP      | 0.825116 | 0.048574 | 0.930395 |
| ORM1      | 0.308157 | 0.275825 | 0.609277 |
| AHSG      | 0.38573  | 0.166351 | 0.664306 |
| TTR       | 0.374984 | 0.23697  | 0.656862 |
| ALB       | 0.450071 | 0.048997 | 0.709598 |
| GC        | 0.292764 | 0.1831   | 0.595788 |
| PPBP      | 0.553503 | -0.21967 | 0.783439 |
| PF4       | 0.0856   | -1.97705 | 0.335537 |
| CXCL10    | 0.779828 | 0.165763 | 0.907277 |
| TFRC      | 0.024286 | 0.508771 | 0.188496 |
| TF        | 0.389353 | 0.131187 | 0.667643 |
| LTF       | 0.600007 | -0.34577 | 0.810262 |
| HPX       | 0.097132 | 0.270931 | 0.354489 |
| FTL       | 0.507389 | 0.152666 | 0.75153  |
| FTH1      | 0.105374 | 0.350511 | 0.369374 |
| MT2A;MT1M | 0.448077 | -0.39182 | 0.708126 |
| PRH1      | 0.686212 | -0.42739 | 0.857929 |
| PRB2;PRB1 |          | 0        |          |
| MT-ND1    | 0.070708 | 0.831386 | 0.310953 |
| MT-ND3    | 0.364478 | 0.855656 | 0.646996 |
| MT-ND4    | 0.194876 | 0.948783 | 0.488911 |
| MT-ND5    | 0.026002 | 0.446758 | 0.193808 |
| MT-ND6    | 0.05812  | 1.788047 | 0.281122 |
| MT-ATP8   | 0.084549 | 0.760032 | 0.335025 |
| ANG       | 0.17076  | 0.576196 | 0.461822 |
| F11       | 0.332666 | 0.526964 | 0.620413 |
| KLKB1     | 0.769117 | 0.329715 | 0.901915 |
| MMP1      | 0.001487 | 2.986878 | 0.039474 |
| SLPI      | 0.376749 | -0.77707 | 0.658264 |
| HLA-B     |          | 0        |          |
| C4BPA     | 0.450097 | 0.311373 | 0.709598 |
| VTN       | 0.354055 | 0.221663 | 0.638094 |
| HMGCR     | 0.44782  | 0.331547 | 0.708118 |
| CAT       | 0.018368 | -0.40019 | 0.163766 |
| RAF1      | 0.674507 | 0.515243 | 0.853175 |
| PLA2G1B   | 0.988991 | 0.035036 | 1        |
| GBA       | 0.190424 | 0.222058 | 0.483515 |
| FUCA1     | 0.277896 | -0.21856 | 0.579677 |
| PROC      | 0.047038 | 1.30572  | 0.255529 |
| ALDOA     | 0.490639 | 0.079158 | 0.738656 |
| CSTB      | 0.017726 | -0.39389 | 0.161012 |
| ANXA1     | 0.2958   | 0.127069 | 0.598344 |
| PDGFA     | 0.139822 | 0.561111 | 0.426504 |
| APOB      | 0.734083 | -0.02173 | 0.882858 |
| NR3C1     | 0.01301  | 0.851953 | 0.139171 |
| TFF1      | 0.310183 | 0.387163 | 0.609864 |
| PRNP      | 0.210006 | 0.643762 | 0.505464 |
| SOD2      | 0.774166 | 0.081023 | 0.903913 |
| LCAT      | 0.19894  | -0.52434 | 0.49217  |
| OAT       | 0.105374 | 0.279524 | 0.369374 |

|           |          |          |          |
|-----------|----------|----------|----------|
| TK1       | 0.185197 | 1.16223  | 0.477569 |
| HRG       | 0.466082 | 0.19358  | 0.721065 |
| THY1      | 1.80E-08 | 1.290475 | 6.25E-06 |
| A1BG      | 0.371444 | 0.18774  | 0.65423  |
| HLA-C     | 0.933998 | -0.05554 | 0.984157 |
| HLA-DRB1  | 0.007122 | -1.41357 | 0.101139 |
| CD74      | 0.181644 | -0.33804 | 0.472575 |
| CD3D      | 0.979679 | 0.142347 | 1        |
| KRT6B     | 0.074776 | 0.740516 | 0.318513 |
| KRT1      | 0.09982  | 0.652131 | 0.359216 |
| S100B     | 0.45704  | 0.444017 | 0.715224 |
| VWF       | 0.61848  | -0.24968 | 0.822194 |
| SHBG      | 0.996448 | -0.05281 | 1        |
| SEMG1     | 0.161733 | 0.547854 | 0.453012 |
| TUBB4A    | 0.057633 | 1.269459 | 0.280499 |
| GAPDH     | 0.734082 | 0.031173 | 0.882858 |
| ASL       | 0.009264 | -0.61661 | 0.116462 |
| IGKV1-16  | 0.664648 | 0.123419 | 0.847351 |
| IGKV1D-39 | 0.85486  | -0.01489 | 0.946993 |
| IGKV3D-11 | 0.218354 | 0.822282 | 0.515816 |
| HLA-A     | 0.259649 | -1.15871 | 0.563057 |
| HLA-DPB1  | 0.056614 | -0.59584 | 0.278081 |
| ERBB2     | 0.324076 | 0.284002 | 0.614309 |
| CAPNS1    | 0.554955 | 0.066373 | 0.783439 |
| TP53      | 0.019673 | 1.645471 | 0.1684   |
| MT1E      | 0.246385 | -1.18185 | 0.549922 |
| AMY1A     | 0.885923 | -0.16908 | 0.96416  |
| AMY2A     | 0.329349 | -0.20819 | 0.619341 |
| HSPB1     | 0.094502 | 0.235106 | 0.349959 |
| CYP1A1    | 0.594656 | -0.08891 | 0.806337 |
| TYMS      | 0.414362 | 0.407497 | 0.685923 |
| CYBB      | 0.135171 | 0.271727 | 0.417833 |
| RPN1      | 0.032856 | 0.229982 | 0.217297 |
| RPN2      | 0.008743 | 0.361186 | 0.112752 |
| GNAI2     | 0.197211 | 0.130056 | 0.490309 |
| SLC4A2    | 0.848297 | 0.062505 | 0.944084 |
| GYPC      | 0.04163  | -1.92707 | 0.241862 |
| IGF1      | 0.319672 | -0.30524 | 0.613139 |
| ATP1A1    | 0.684992 | -0.0239  | 0.85709  |
| ATP1B1    | 0.102567 | -0.32224 | 0.364372 |
| CHGB      | 0.438587 | 0.339001 | 0.701933 |
| ALDOB     | 0.36341  | -0.55351 | 0.646996 |
| APP       | 0.014008 | 0.654903 | 0.144006 |
| ARG1      | 0.809682 | -0.23329 | 0.921586 |
| APOD      | 0.241676 | 0.203835 | 0.544139 |
| ALDH2     | 0.422885 | -0.1127  | 0.691467 |
| CYP17A1   | 0.235307 | 0.280785 | 0.537436 |
| ITGB3     | 0.038324 | 1.019482 | 0.234656 |
| ITGB2     | 0.097132 | 0.222833 | 0.354489 |
| S100A8    | 0.163989 | 0.581159 | 0.453453 |
| HMG1      | 0.780711 | -0.09683 | 0.908113 |
| SERP1B2   | 0.411887 | -0.30997 | 0.683152 |
| SERP1E1   | 0.267754 | 0.870727 | 0.570195 |
| SLC25A5   | 0.897655 | -0.02327 | 0.969793 |
| SERP1A5   | 0.387089 | 0.488962 | 0.666026 |
| SERP1G1   | 0.206534 | 0.225761 | 0.500256 |
| CFI       | 0.153276 | 0.237627 | 0.443165 |
| F13B      | 0.742473 | -0.26167 | 0.888303 |

|               |          |          |          |
|---------------|----------|----------|----------|
| ISG15         | 0.764084 | 0.182143 | 0.899242 |
| MPO           | 0.524435 | 0.340234 | 0.764023 |
| PCCA          | 0.632496 | -0.06983 | 0.830965 |
| PCCB          | 0.739057 | -0.02413 | 0.886253 |
| ALPL          | 0.009768 | -1.9656  | 0.119724 |
| ALPP          | 0.313018 | -0.49669 | 0.611104 |
| EIF2S1        | 0.694713 | 0.049142 | 0.861478 |
| HMGN2         | 0.345511 | 0.347233 | 0.632227 |
| FGF1          | 0.01027  | 1.010374 | 0.122478 |
| ICAM1         | 0.218632 | 0.169157 | 0.515816 |
| RPLP1         | 0.120332 | 0.306089 | 0.39497  |
| RPLP2         | 0.340521 | 0.144683 | 0.627258 |
| RPLP0;RPLP0P6 | 0.016204 | 0.174618 | 0.154611 |
| JUN           | 0.042311 | 1.432622 | 0.243142 |
| FABP3         | 0.637196 | 0.460205 | 0.833511 |
| POLR3D        | 0.013294 | 0.867849 | 0.141215 |
| REG1A         | 0.594656 | -0.17852 | 0.806337 |
| CLEC3B        | 0.000815 | 0.839789 | 0.027022 |
| SSB           | 0.060574 | 0.292951 | 0.287134 |
| HLA-A         | 0.845717 | -0.05554 | 0.942239 |
| HLA-DQB2      | 0.501431 | 0.522997 | 0.746793 |
| SERPINA7      | 0.430639 | 0.680971 | 0.695651 |
| SERPIND1      | 0.305036 | 0.300389 | 0.606083 |
| TFAP2A        | 0.157982 | 0.726033 | 0.448701 |
| ITGB1         | 0.053686 | 0.225567 | 0.271145 |
| PRKCB         | 0.453859 | -0.57892 | 0.712914 |
| KRT18         | 0.887225 | 0.144904 | 0.96416  |
| KRT8          | 0.913333 | 0.122322 | 0.975706 |
| CALB1         | 0.492913 | 0.462718 | 0.741084 |
| MYL1          | 0.733732 | -0.09318 | 0.882858 |
| HPN           | 0.292894 | 0.628279 | 0.595821 |
| COL5A2        | 0.000159 | 1.07991  | 0.009008 |
| CD1A          | 0.453758 | 0.550703 | 0.712914 |
| CD5           | 0.494535 | -0.73184 | 0.741997 |
| UROD          | 0.575023 | -0.23659 | 0.796599 |
| UGT2B4        | 0.163438 | -0.2328  | 0.453012 |
| INSR          | 0.001749 | 0.921112 | 0.043787 |
| LCK           | 0.83252  | -0.20196 | 0.93551  |
| FYN           | 0.688429 | 0.328465 | 0.859429 |
| BCHE          | 0.745437 | 0.106029 | 0.888898 |
| GLA           | 0.007779 | 0.563244 | 0.105988 |
| IGKV2-30      | 0.152843 | 1.29845  | 0.443165 |
| IGKV4-1       | 0.96579  | -0.29403 | 0.99616  |
| IGHV4-34      | 0.142807 | 1.297493 | 0.430424 |
| HLA-DOA       | 0.103355 | -1.17775 | 0.366609 |
| GSN           | 0.04253  | 0.155487 | 0.243142 |
| RB1           | 0.303914 | 0.595255 | 0.606083 |
| PTMA          | 0.422885 | -0.01779 | 0.691467 |
| CDK1          | 0.065669 | 1.312257 | 0.299507 |
| ATP5B         | 0.266378 | 0.159241 | 0.568807 |
| C2            | 0.35064  | 0.445115 | 0.635657 |
| S100A9        | 0.67051  | 0.124701 | 0.850681 |
| S100A6        | 0.918567 | -0.06614 | 0.978657 |
| APOA4         | 0.38573  | 0.119355 | 0.664306 |
| CD2           | 0.570773 | 0.406542 | 0.793891 |
| EIF4E         | 0.581788 | -0.01697 | 0.797998 |
| CEACAM5       | 0.424752 | 0.303304 | 0.693599 |
| CKM           | 0.22852  | 0.685344 | 0.528484 |

|          |          |          |          |
|----------|----------|----------|----------|
| ENO1     | 0.830256 | 0.07853  | 0.933615 |
| PYGL     | 0.442223 | 0.208182 | 0.703704 |
| GPI      | 0.72417  | 0.187574 | 0.876654 |
| POLB     | 0.106075 | 0.709054 | 0.370631 |
| NPM1     | 0.18381  | 0.174026 | 0.474829 |
| TPM3     | 0.142204 | 0.168473 | 0.428816 |
| ITGAV    | 2.08E-10 | 0.967364 | 3.84E-07 |
| LPL      | 0.623324 | 0.470003 | 0.826059 |
| HEXA     | 0.934288 | -0.03689 | 0.984157 |
| SERPINE2 | 0.000502 | 2.390785 | 0.020488 |
| EPHX1    | 0.084549 | -0.30938 | 0.335025 |
| DBI      | 0.498977 | -0.12122 | 0.744839 |
| LDHB     | 0.085745 | 0.331887 | 0.335537 |
| NEFL     | 0.976387 | 0.003926 | 0.998921 |
| NEFM     | 0.214668 | 0.778863 | 0.510809 |
| CENPB    | 0.410055 | 0.768348 | 0.682809 |
| GPX1     | 0.882017 | -0.06363 | 0.961515 |
| THBD     | 0.353207 | 0.54188  | 0.638094 |
| PGK2     | 0.495315 | 0.326654 | 0.74257  |
| PROS1    | 0.374984 | 0.116885 | 0.656862 |
| P4HB     | 0.33719  | 0.177829 | 0.624371 |
| H1FO     | 0.371444 | -0.39974 | 0.65423  |
| ACYP1    | 0.377803 | 0.641177 | 0.659304 |
| FES      | 0.247021 | 0.05203  | 0.549922 |
| CSF1R    | 0.010931 | 1.514067 | 0.127049 |
| CTSD     | 0.902877 | 0.036625 | 0.971583 |
| ANXA2    | 0.030249 | 0.256941 | 0.209418 |
| C8A      | 0.09193  | 0.410248 | 0.345626 |
| C8B      | 0.153276 | 0.609406 | 0.443165 |
| GP1BA    | 0.954108 | 0.067562 | 0.993074 |
| C8G      | 0.102567 | 0.757763 | 0.364372 |
| CAPN1    | 0.61848  | -0.03587 | 0.822194 |
| TUBB     | 0.001332 | 0.440847 | 0.036119 |
| CA3      | 0.256769 | -1.12298 | 0.560316 |
| IVL      | 0.287148 | -0.91422 | 0.590535 |
| PRSS2    | 0.981503 | 0.290202 | 1        |
| ADRB2    | 0.594656 | -0.06511 | 0.806337 |
| DCN      | 0.072266 | 0.360681 | 0.313701 |
| PSAP     | 0.923804 | -0.01208 | 0.980751 |
| HEXB     | 0.272095 | 0.135633 | 0.575039 |
| CTSL     | 0.546147 | -0.18248 | 0.778738 |
| PFN1     | 0.462056 | 0.10174  | 0.718747 |
| BPGM     | 0.266373 | -0.54221 | 0.568807 |
| APRT     | 0.078771 | -0.26662 | 0.32578  |
| CD3E     | 0.748004 | -0.24963 | 0.890902 |
| EPRS     | 0.651389 | 0.018128 | 0.839222 |
| CTSB     | 0.044589 | 0.286078 | 0.24851  |
| HSP90AA1 | 0.06524  | 0.250545 | 0.298136 |
| GALT     | 0.085603 | -0.74617 | 0.335537 |
| HNRNPC   | 0.882017 | 0.01618  | 0.961515 |
| UQCRH    | 0.887225 | -0.07095 | 0.96416  |
| LAMB1    | 0.044589 | 0.272773 | 0.24851  |
| YES1     | 0.694713 | 0.013232 | 0.861478 |
| LYN      | 0.809743 | 0.023497 | 0.921586 |
| TPM2     | 0.000224 | 0.607529 | 0.011599 |
| FH       | 0.981581 | -0.03621 | 1        |
| SFTPB    | 0.0042   | -1.3022  | 0.073945 |
| ERCC1    | 0.002199 | 1.59629  | 0.05007  |

|          |          |          |          |
|----------|----------|----------|----------|
| THBS1    | 2.87E-06 | 2.035878 | 0.000346 |
| RNASE1   | 0.613292 | -0.17599 | 0.819264 |
| GJB1     | 0.502839 | -0.4346  | 0.747596 |
| SP1      | 0.451722 | -0.25479 | 0.711655 |
| IGF1R    | 0.702166 | 0.263588 | 0.866168 |
| COL1A2   | 0.244338 | 0.371899 | 0.547425 |
| ANXA6    | 0.088177 | 0.180327 | 0.339301 |
| RHOC     | 0.044577 | 0.07656  | 0.24851  |
| NGFR     | 0.334656 | -0.74846 | 0.62172  |
| CD55     | 0.357491 | 0.197592 | 0.641472 |
| ABCB1    | 0.769745 | -0.17127 | 0.902552 |
| SERPINA6 | 0.748889 | 0.343015 | 0.890902 |
| SLC3A2   | 0.017412 | 0.312718 | 0.159467 |
| GUSB     | 0.486499 | 0.114347 | 0.73612  |
| PFKM     | 0.255193 | 0.144401 | 0.557593 |
| HSP90AB1 | 0.090665 | 0.19197  | 0.343901 |
| SRPR     | 0.192667 | 0.20625  | 0.486094 |
| ASNS     | 0.08816  | 0.932258 | 0.339301 |
| ELANE    | 0.33388  | -0.71138 | 0.620902 |
| SYN      | 0.396507 | -0.7574  | 0.67382  |
| MMP2     | 2.44E-06 | 1.368358 | 0.000298 |
| GSTA1    | 0.76023  | 0.142822 | 0.897659 |
| SOD3     | 0.613839 | -0.3858  | 0.819264 |
| CTSG     | 0.112657 | -0.57529 | 0.382523 |
| HMBS     | 0.524424 | -0.17936 | 0.764023 |
| MME      | 0.393263 | 0.964489 | 0.671013 |
| INHBA    | 1        | -0.10025 | 1        |
| MGP      | 0.422605 | -0.15552 | 0.691467 |
| ITGA2B   | 0.574284 | 0.532327 | 0.795974 |
| LPA      | 0.422846 | -0.34926 | 0.691467 |
| PDHA1    | 0.072266 | -0.21084 | 0.313701 |
| PLEK     | 0.490639 | -0.18292 | 0.738656 |
| CD14     | 0.051278 | 0.555609 | 0.265139 |
| COL4A2   | 0.357491 | -0.27056 | 0.641472 |
| CYC1     | 0.784286 | -0.06749 | 0.909506 |
| PTPRC    | 0.699592 | 0.000597 | 0.864146 |
| SNRNPB2  | 0.277896 | 0.191508 | 0.579677 |
| MET      | 0.214743 | -0.80713 | 0.510878 |
| MFI2     | 0.009886 | 1.737735 | 0.120352 |
| MYL3     | 0.944783 | -0.26541 | 0.988547 |
| CFH      | 0.021148 | 0.478381 | 0.173882 |
| SNRNP70  | 0.604602 | 0.082374 | 0.813002 |
| HCK      | 0.192667 | 0.455965 | 0.486094 |
| FCGR3A   | 0.117214 | 0.610394 | 0.389929 |
| ITGA5    | 0.000172 | 0.884366 | 0.009509 |
| NFIC     | 0.590866 | 0.011357 | 0.804875 |
| VIM      | 0.006009 | 0.289009 | 0.090802 |
| SERPINF2 | 0.595428 | -0.00893 | 0.806337 |
| RPS17    | 0.173168 | 0.112252 | 0.464476 |
| F7       | 0.696813 | -0.19983 | 0.863213 |
| KRT19    | 0.882017 | 0.075804 | 0.961515 |
| KRT7     | 0.71923  | -0.30967 | 0.874478 |
| GNAI3    | 0.201834 | 0.158569 | 0.495032 |
| ANXA5    | 0.181644 | 0.150326 | 0.472575 |
| KRT16    | 0.037785 | 2.183419 | 0.233205 |
| STS      | 0.124902 | -1.15928 | 0.401334 |
| RPSA     | 0.02267  | 0.233804 | 0.180886 |
| ABHD2    | 0.957231 | 0.021605 | 0.994122 |



|               |          |          |          |
|---------------|----------|----------|----------|
| ADRA2A        | 0.763077 | -0.15773 | 0.899242 |
| ROS1          | 0.401979 | -0.42026 | 0.678038 |
| CD63          | 0.577274 | 0.488861 | 0.796634 |
| MRPL3         | 0.96843  | -0.29481 | 0.997592 |
| SNRPA         | 0.651389 | 0.013816 | 0.839222 |
| FGF2          | 0.115504 | -1.12554 | 0.387731 |
| ENO2          | 0.211314 | 0.450094 | 0.506632 |
| HBQ1          | 0.112919 | -0.81451 | 0.382992 |
| ACAA1         | 0.415291 | -0.14221 | 0.686028 |
| SRP19         | 0.694709 | -0.06975 | 0.861478 |
| GSTP1         | 0.61848  | -0.09671 | 0.822194 |
| CST2          | 0.657906 | -0.3318  | 0.842898 |
| SNRPC         | 0.063339 | 0.237058 | 0.294055 |
| MMP7          | 0.571946 | 0.54557  | 0.794481 |
| MMP10         | 0.100431 | 1.098011 | 0.360829 |
| CD48          | 0.997368 | -0.00807 | 1        |
| VIL1          | 0.113096 | 1.219477 | 0.383358 |
| CXCL1         | 0.563678 | -0.19338 | 0.789479 |
| LGALS1        | 4.64E-05 | 0.470036 | 0.003385 |
| QDPR          | 0.389353 | -0.19902 | 0.667643 |
| HMGB1;HMGB1P1 | 0.78936  | 0.00392  | 0.911483 |
| RBP1          | 0.000641 | 1.262574 | 0.023555 |
| PAEP          | 0.481732 | -0.35728 | 0.733586 |
| FBP1          | 0.360948 | -0.26604 | 0.644411 |
| GNAO1         | 0.778738 | -0.43232 | 0.906856 |
| SPARC         | 4.99E-09 | 1.216937 | 2.81E-06 |
| GSTM1         | 0.639403 | 0.567802 | 0.834603 |
| TPM1          | 0.000611 | 0.472086 | 0.023051 |
| CLTA          | 0.986843 | -0.26378 | 1        |
| CLTB          | 0.637197 | 0.044325 | 0.833511 |
| ANXA4         | 0.426712 | -0.07771 | 0.693599 |
| INHBB         | 0.547842 | 0.34685  | 0.779889 |
| CNP           | 0.442223 | 0.112295 | 0.703704 |
| WNT2          | 0.420295 | 0.354994 | 0.690386 |
| CD7           | 0.419888 | 0.551571 | 0.690026 |
| HMOX1         | 0.112657 | 0.373643 | 0.382523 |
| CSF1          | 0.30483  | 0.321041 | 0.606083 |
| PDGFRB        | 0.009812 | 0.644336 | 0.119724 |
| DLD           | 0.206534 | -0.22546 | 0.500256 |
| HNRNPA1       | 0.311298 | 0.143483 | 0.609894 |
| SNRPA1        | 0.45805  | 0.100551 | 0.715224 |
| CTSH          | 0.049723 | -0.73253 | 0.261364 |
| COX6C         | 0.600007 | 0.263197 | 0.810262 |
| CD3G          | 0.280303 | -0.69136 | 0.583434 |
| TACSTD2       | 0.236413 | -0.21259 | 0.537858 |
| FGR           | 0.819807 | 0.093058 | 0.92687  |
| C1S           | 2.46E-05 | 0.990247 | 0.001979 |
| PARP1         | 0.032856 | 0.25829  | 0.217297 |
| POLA1         | 0.471168 | 0.156631 | 0.725694 |
| IFI6          | 1        | -0.00758 | 1        |
| IFIT2         | 0.9238   | -0.05476 | 0.980751 |
| IFIT1         | 0.537409 | 0.212376 | 0.773175 |
| ALOX5         | 0.153276 | 0.245707 | 0.443165 |
| UCHL1         | 0.001215 | 1.296928 | 0.034268 |
| FURIN         | 0.823669 | 0.157159 | 0.930182 |
| LTA4H         | 0.26355  | -0.22706 | 0.565873 |
| ALDOC         | 0.231232 | 0.267819 | 0.531962 |
| C4A           | 0.595428 | 0.139785 | 0.806337 |

|                       |          |          |          |
|-----------------------|----------|----------|----------|
| C4B                   | 0.149515 | 0.27977  | 0.438811 |
| TFPT                  | 0.966947 | -0.07206 | 0.996989 |
| FBXO45                | 0.465993 | 0.464181 | 0.721065 |
| H2AFB2;H2AFB1         | 0.322009 | 0.22017  | 0.613139 |
| CISD3                 | 0.468067 | -0.45329 | 0.722799 |
| ATXN1L                | 0.394605 | 0.271402 | 0.672349 |
| JMJD7                 | 0.048522 | -0.60157 | 0.258731 |
| MYZAP                 | 0.030982 | -1.35852 | 0.212639 |
| POLR2M                | 0.902584 | -0.10897 | 0.971583 |
| GPR89B;GPR89A         | 0.404052 | 0.188297 | 0.678271 |
| CHTF8                 | 0.877866 | -0.11138 | 0.95982  |
| GSTT2B;GSTT2          | 0.938609 | -0.31474 | 0.986498 |
| TMSB15B;TMSB15A       | 0.733732 | -0.14258 | 0.882858 |
| POTEI                 | 0.882917 | -0.24216 | 0.962401 |
| ZNF865                | 0.207345 | 0.444987 | 0.501941 |
| ZNF888                | 0.750672 | -0.14064 | 0.892487 |
| SLC35E2B              | 0.215007 | 0.630437 | 0.511286 |
| LIMS3L;LIMS3          | 0.473185 | -0.52751 | 0.727018 |
| TRAPPC2B;TRAPPC2      | 0.210533 | 1.292618 | 0.506604 |
| RAB34                 | 0.115283 | 0.705246 | 0.387731 |
| PET100                | 0.228985 | -0.88657 | 0.529099 |
| SMIM13                | 0.086478 | 0.69529  | 0.337307 |
| RGPD1;RGPD2           | 0.965711 | -0.05628 | 0.99616  |
| RBMV1A1;RBMV1C;RBMV1F | 0.393617 | 0.205625 | 0.671013 |
| PGA5;PGA3;PGA4        | 0.57907  | -0.24156 | 0.796675 |
| SAA1                  | 0.516723 | 0.590005 | 0.758769 |
| SAA2                  | 0.421207 | -0.31784 | 0.691066 |
| SULT1A4;SULT1A3       | 0.613784 | -0.48873 | 0.819264 |
| HSPA1B;HSPA1A         | 0.627809 | -0.05025 | 0.828932 |
| SMIM10L2B;SMIM10L2A   | 0.040567 | 0.996074 | 0.240216 |
| U2AF1                 | 0.006131 | 0.337664 | 0.092018 |
| CBS                   | 0.074811 | 0.735322 | 0.318513 |
| IGLC2                 | 0.537408 | 0.161216 | 0.773175 |
| IGLC3                 | 0.011148 | -1.14822 | 0.128261 |
| IGHV1-8               | 0.534225 | 0.354547 | 0.771496 |
| IGHV3-30-3            | 0.322009 | 0.158767 | 0.613139 |
| IGHV3-30-5;IGHV3-30   | 0.151386 | 0.162087 | 0.44125  |
| IGHV4-38-2            | 0.044351 | 0.850568 | 0.24851  |
| IGKV1D-13             | 0.008027 | 2.072612 | 0.107782 |
| CALM3;CALM2;CALM1     | 0.162993 | -0.12163 | 0.453012 |
| SLURP2                | 0.041397 | 0.762854 | 0.240826 |
| POLR1D                | 0.656074 | 0.135126 | 0.84209  |
| EEF1AKMT4             | 0.85486  | -0.13518 | 0.946993 |
| GATD3A;GATD3B         | 0.235109 | -0.10533 | 0.537205 |
| N/A                   | 0.556057 | 0.226453 | 0.783439 |
| NOTCH2NL              | 0.496019 | 0.279475 | 0.743024 |
| GLI3                  | 1        | -0.02479 | 1        |
| FDX1                  | 0.340521 | -0.30835 | 0.627258 |
| RAP2A                 | 0.473924 | 0.255589 | 0.727018 |
| SRGN                  | 0.351988 | 0.672494 | 0.637267 |
| GZMB                  | 0.664325 | 0.083369 | 0.847289 |
| CXCL8                 | 0.22225  | 1.229512 | 0.520592 |
| RNASE2                | 0.679345 | -1.01135 | 0.85545  |
| TROVE2                | 0.266378 | 0.159129 | 0.568807 |
| COX8A                 | 0.647153 | -0.31815 | 0.837719 |
| GAA                   | 0.211314 | 0.2826   | 0.506632 |
| RARA                  | 0.901067 | 0.102632 | 0.971583 |
| RRAS                  | 0.97106  | 0.026348 | 0.997592 |

|          |          |          |          |
|----------|----------|----------|----------|
| HLA-C    | 0.466082 | -0.14607 | 0.721065 |
| ARAF     | 0.162993 | 0.282426 | 0.453012 |
| HIST1H1E | 0.03257  | -1.09944 | 0.217083 |
| BCL2     | 0.585715 | 0.238195 | 0.801141 |
| SPP1     | 0.02431  | 2.098929 | 0.188548 |
| DLAT     | 0.149515 | -0.14445 | 0.438811 |
| PTPRF    | 0.444182 | -0.33683 | 0.705893 |
| NR2F6    | 0.787276 | 0.205561 | 0.911483 |
| NR2F1    | 0.04183  | 1.036214 | 0.242066 |
| TXN      | 0.784286 | 0.069569 | 0.909506 |
| TGFB3    | 0.003764 | 1.566715 | 0.07038  |
| COX5B    | 0.343873 | -0.02731 | 0.630156 |
| CTSA     | 0.077655 | 0.257619 | 0.324641 |
| MGST1    | 0.272095 | -0.22761 | 0.575039 |
| MAPT     | 0.860773 | -0.02649 | 0.950165 |
| C7       | 0.507389 | 0.069662 | 0.75153  |
| PRKAR1A  | 0.550543 | 0.070043 | 0.781327 |
| CHGA     | 0.331588 | -0.12323 | 0.619341 |
| TFPI     | 0.212513 | -0.31794 | 0.508737 |
| ALPPL2   | 0.188366 | -1.1253  | 0.48038  |
| PF4V1    | 0.331588 | -0.14777 | 0.619341 |
| KIT      | 0.106848 | -1.08416 | 0.371691 |
| UROS     | 0.058851 | 1.869168 | 0.28342  |
| ESD      | 0.277896 | -0.21552 | 0.579677 |
| HSPD1    | 0.118765 | -0.16356 | 0.392409 |
| CLU      | 0.819984 | 0.004633 | 0.92687  |
| HAPLN1   | 0.058284 | 1.485665 | 0.281667 |
| MYL2     | 0.638802 | 0.181579 | 0.834211 |
| HSPA5    | 0.266378 | 0.121503 | 0.568807 |
| LAMC1    | 0.550543 | -0.18002 | 0.781327 |
| CD37     | 0.365931 | 0.86832  | 0.648976 |
| ACP2     | 0.026002 | 0.291353 | 0.193808 |
| MAP2     | 0.248149 | 0.792973 | 0.551436 |
| HSPA8    | 0.013012 | 0.18609  | 0.139171 |
| SLC2A1   | 0.11117  | 0.664859 | 0.380668 |
| SLC2A3   | 0.007751 | 2.183189 | 0.105988 |
| EPB41    | 0.026898 | -0.44071 | 0.198225 |
| UMPS     | 0.043893 | 0.408009 | 0.247494 |
| PDHB     | 0.902877 | 0.002283 | 0.971583 |
| DBT      | 0.415291 | -0.16526 | 0.686028 |
| ITGAM    | 0.071226 | 0.283322 | 0.311134 |
| PYGB     | 0.010002 | -0.44104 | 0.120967 |
| PYGM     | 0.013385 | -1.61005 | 0.141515 |
| MBL2     | 0.683128 | 0.144297 | 0.85709  |
| RALA     | 0.213733 | 0.243525 | 0.509228 |
| RALB     | 0.023065 | 0.270287 | 0.182986 |
| BCR      | 0.037126 | 0.381694 | 0.23107  |
| SPTB     | 0.094502 | -0.67008 | 0.349959 |
| LAMP1    | 0.675324 | 0.07712  | 0.853175 |
| ERG      | 0.860676 | 0.089534 | 0.950165 |
| ACADM    | 0.327323 | 0.0814   | 0.617719 |
| FGFR1    | 0.124128 | 0.507149 | 0.400153 |
| TOP1     | 0.450097 | -0.02096 | 0.709598 |
| TOP2A    | 0.008618 | 1.530505 | 0.111658 |
| G6PD     | 0.744041 | 0.073781 | 0.888303 |
| UBL4A    | 0.482377 | -0.07648 | 0.733586 |
| VDR      | 0.180494 | 0.716414 | 0.472575 |
| ESRRA    | 0.072467 | 0.852949 | 0.314326 |

|         |          |          |          |
|---------|----------|----------|----------|
| PC      | 0.26355  | 0.176407 | 0.565873 |
| DMD     | 0.789359 | 0.296334 | 0.911483 |
| MTHFD1  | 0.490639 | 0.163975 | 0.738656 |
| CETP    | 0.40269  | -0.23359 | 0.678038 |
| EPX     | 0.655653 | -0.16736 | 0.84209  |
| SCGB1A1 | 0.924899 | -0.03796 | 0.981632 |
| SFTPC   | 0.007461 | -2.92431 | 0.10395  |
| IGF2R   | 0.11568  | 0.417831 | 0.387731 |
| ADH5    | 0.78936  | -0.07288 | 0.911483 |
| CDK4    | 0.407773 | 0.375829 | 0.680612 |
| SRF     | 0.196915 | 0.434973 | 0.490309 |
| MS4A1   | 0.976777 | -0.02496 | 0.999117 |
| PRPS2   | 0.902877 | 0.009807 | 0.971583 |
| CD79A   | 0.996024 | -0.0601  | 1        |
| ODC1    | 1        | -0.12759 | 1        |
| PABPC1  | 0.026898 | 0.159198 | 0.198225 |
| PCNA    | 0.35064  | 0.239811 | 0.635657 |
| KRT3    | 0.74145  | 0.037488 | 0.887483 |
| NEFH    | 0.105925 | -0.38926 | 0.370605 |
| COX6A1  | 0.819957 | 0.540619 | 0.92687  |
| HARS    | 0.058787 | 0.242434 | 0.283235 |
| COL11A1 | 0.000131 | 2.668886 | 0.007794 |
| COL6A1  | 0.887225 | -0.02567 | 0.96416  |
| COL6A2  | 0.992106 | -0.05297 | 1        |
| COL6A3  | 0.407778 | 0.091854 | 0.680612 |
| SLC25A4 | 0.108241 | -0.31697 | 0.374055 |
| SLC25A6 | 0.554955 | 0.080504 | 0.783439 |
| F5      | 0.925711 | -0.23323 | 0.982024 |
| IMPDH2  | 0.06524  | 0.21932  | 0.298136 |
| TPR     | 0.145824 | 0.230699 | 0.434185 |
| PTHLH   | 0.163438 | -0.33213 | 0.453012 |
| PIP     | 0.904949 | -0.1822  | 0.972966 |
| CKB     | 0.108241 | 0.603666 | 0.374055 |
| FCGR1A  | 0.038035 | 0.70487  | 0.233324 |
| FCGR2A  | 0.277869 | 0.54662  | 0.579677 |
| ANXA3   | 0.001057 | -1.1016  | 0.031507 |
| MYCLP1  | 0.163438 | -0.23414 | 0.453012 |
| CKMT1A  | 0.47351  | -0.41204 | 0.727018 |
| GZMA    | 0.150297 | -1.18719 | 0.440175 |
| BMP2    | 1        | -0.11578 | 1        |
| BMP3    | 0.801334 | -0.24102 | 0.91752  |
| BCKDHA  | 0.252448 | -0.20213 | 0.555643 |
| RNASE3  | 0.252339 | 0.944299 | 0.555643 |
| SKI     | 0.670768 | -0.03205 | 0.850681 |
| ACTN1   | 1.43E-08 | 0.712722 | 6.25E-06 |
| ACE     | 0.515876 | -0.28734 | 0.757825 |
| MYL4    | 0.64451  | 0.253955 | 0.837353 |
| CDH1    | 0.581788 | -0.2646  | 0.797998 |
| DEFA4   | 0.599931 | -0.38579 | 0.810262 |
| MYH1    | 0.751942 | -0.02973 | 0.893287 |
| MYH7    | 0.60099  | 0.28725  | 0.811292 |
| SRC     | 0.660922 | 0.150213 | 0.844596 |
| PEPD    | 0.015914 | 0.413064 | 0.153751 |
| XRCC6   | 0.155183 | 0.103999 | 0.444958 |
| XRCC5   | 0.043893 | 0.202204 | 0.247494 |
| UNG     | 0.104302 | 1.278001 | 0.367825 |
| COX4I1  | 0.515876 | -0.09855 | 0.757825 |
| ALAS1   | 0.622941 | 0.400853 | 0.825978 |

|          |          |          |          |
|----------|----------|----------|----------|
| GP1BB    | 0.954108 | 0.042621 | 0.993074 |
| IFI30    | 0.656149 | -0.14057 | 0.84209  |
| LAMP2    | 0.378546 | 0.229601 | 0.659304 |
| RNH1     | 0.929044 | -0.03242 | 0.983115 |
| BMP1     | 1.00E-05 | 2.514567 | 0.000968 |
| CYBA     | 0.981581 | -0.19644 | 1        |
| CCL2     | 0.169846 | -0.62285 | 0.461029 |
| CCL5     | 0.731297 | 0.14741  | 0.881419 |
| SCG2     | 0.145176 | 0.486013 | 0.433769 |
| CFTR     | 0.488913 | -0.40837 | 0.738656 |
| CYP4B1   | 0.112205 | -1.33894 | 0.382523 |
| NCAM1    | 0.285971 | -0.70196 | 0.590053 |
| ICAM2    | 0.975991 | -0.02845 | 0.998921 |
| VCAN     | 4.26E-09 | 1.359462 | 2.62E-06 |
| ITGA4    | 0.208913 | 0.316914 | 0.503054 |
| ATP1A3   | 0.986749 | -0.05211 | 1        |
| EEF2     | 0.013502 | 0.281281 | 0.141812 |
| KRT10    | 0.130075 | 0.749868 | 0.410899 |
| KRT13    | 0.445494 | 0.532401 | 0.706795 |
| KRT5     | 0.814855 | 0.328447 | 0.924847 |
| PDIA4    | 0.102567 | 0.207354 | 0.364372 |
| C6       | 0.155183 | 0.376027 | 0.444958 |
| P4HA1    | 1.73E-05 | 0.850958 | 0.001521 |
| ZNF35    | 0.813008 | -0.15928 | 0.924544 |
| ACP5     | 0.736568 | 0.037918 | 0.884985 |
| CEACAM1  | 0.145421 | 0.818418 | 0.434185 |
| TPT1     | 0.462056 | 0.051256 | 0.718747 |
| ALAD     | 0.825116 | -0.07714 | 0.930395 |
| F3       | 0.695601 | 0.299619 | 0.862317 |
| PRG2     | 0.804484 | -0.27522 | 0.918848 |
| HLA-A    | 0.71452  | -0.33401 | 0.871808 |
| HLA-E    | 0.830256 | -0.12455 | 0.933615 |
| HLA-DRB1 | 0.258457 | -1.27379 | 0.560954 |
| HLA-DRB1 | 0.334021 | -1.19771 | 0.620956 |
| HLA-DRB4 | 0.304151 | -1.21289 | 0.606083 |
| HLA-DOB  | 0.195154 | -0.80407 | 0.489252 |
| LCP1     | 0.609213 | 0.126842 | 0.816529 |
| PLS3     | 0.003027 | 0.490489 | 0.062294 |
| APEH     | 0.407778 | -0.09152 | 0.680612 |
| ETFA     | 0.835403 | 0.020804 | 0.935999 |
| GYS1     | 0.2958   | 0.108495 | 0.598344 |
| PRKAR2A  | 0.396661 | -0.12056 | 0.67382  |
| SLC5A1   | 0.163707 | 0.721693 | 0.453012 |
| ANXA8    | 0.222954 | 0.828217 | 0.521792 |
| ENO3     | 0.990163 | -0.05667 | 1        |
| GTF2F2   | 0.136904 | 0.496556 | 0.421544 |
| CD59     | 0.590866 | -0.07264 | 0.804875 |
| CCDC130  | 0.188151 | 0.377308 | 0.480067 |
| MTHFD2   | 0.009994 | 1.468539 | 0.120967 |
| CTSE     | 0.324546 | -0.91656 | 0.615095 |
| SELL     | 0.959835 | -0.05003 | 0.994122 |
| MIF      | 0.934288 | 0.028631 | 0.984157 |
| FOLR2    | 0.699592 | -0.31996 | 0.864146 |
| CD99     | 0.016797 | 1.393602 | 0.156698 |
| HGF      | 0.158441 | 0.713485 | 0.449659 |
| PRF1     | 0.475075 | -0.56803 | 0.728131 |
| PRKCSH   | 0.162993 | 0.213912 | 0.453012 |
| IRF2     | 0.959194 | 0.020453 | 0.994122 |

|          |          |          |          |
|----------|----------|----------|----------|
| HCLS1    | 0.055344 | 0.404008 | 0.274516 |
| FDPS     | 0.09982  | 0.203767 | 0.359216 |
| TRIM27   | 0.955268 | 0.077381 | 0.993074 |
| CPM      | 0.704483 | -0.10357 | 0.867291 |
| COX7A2   | 0.72417  | 0.026985 | 0.876654 |
| ATP1B2   | 0.019466 | -1.18268 | 0.16752  |
| NID1     | 0.169043 | -0.38093 | 0.459676 |
| AKR1A1   | 0.960544 | 0.026172 | 0.994122 |
| PLA2G2A  | 0.197664 | 1.141301 | 0.491215 |
| NCF1     | 0.073319 | 0.592534 | 0.31592  |
| PKM      | 0.244338 | 0.225781 | 0.547425 |
| ACYP2    | 0.026493 | -0.9366  | 0.196153 |
| HSP90B1  | 0.067188 | 0.19248  | 0.302058 |
| CCNB1    | 0.861345 | -0.11723 | 0.950187 |
| MYL6B    | 0.175259 | -0.23762 | 0.466796 |
| SLC2A4   | 0.016508 | -0.99571 | 0.155558 |
| IDE      | 0.164991 | 0.234196 | 0.454525 |
| GP9      | 0.310183 | -0.36864 | 0.609864 |
| IL1R1    | 0.34232  | 0.529702 | 0.629735 |
| MMP9     | 0.03339  | 1.100072 | 0.219585 |
| COX6B1   | 0.76912  | 0.150248 | 0.901915 |
| POU2F1   | 0.779188 | 0.15415  | 0.906856 |
| HNRNPL   | 0.343873 | 0.134178 | 0.630156 |
| DARS     | 0.764084 | 0.027673 | 0.899242 |
| IDO1     | 0.940597 | -0.05904 | 0.987239 |
| ETS1     | 0.008494 | 1.593388 | 0.110825 |
| JUP      | 0.2958   | 0.128477 | 0.598344 |
| UQCRB    | 0.013012 | -0.35386 | 0.139171 |
| LIF      |          | 0        |          |
| ETS2     | 0.322009 | 0.14657  | 0.613139 |
| BRAF     | 0.36861  | -0.52244 | 0.651515 |
| CPB1     | 0.57907  | -0.14266 | 0.796675 |
| CPA3     | 0.064735 | -1.19299 | 0.297421 |
| FABP4    | 0.185033 | -0.98156 | 0.477255 |
| GLUL     | 0.651389 | -0.01894 | 0.839222 |
| AKR1B1   | 0.055344 | 0.262865 | 0.274516 |
| ANPEP    | 0.004905 | 0.888604 | 0.082133 |
| PVR      | 0.257801 | 0.886354 | 0.560462 |
| RAC2     | 0.494799 | 0.004054 | 0.741997 |
| CPN1     | 0.11703  | 0.966398 | 0.389929 |
| GSPT1    | 0.586319 | -0.09618 | 0.801141 |
| PGAM2    | 1        | -0.09023 | 1        |
| IFNGR1   | 0.991882 | -0.13499 | 1        |
| ARSA     | 0.400346 | -0.24408 | 0.67622  |
| B4GALT1  | 0.020774 | 1.142851 | 0.172048 |
| ACPP     | 0.976246 | 0.157397 | 0.998921 |
| EZR      | 0.084549 | -0.28782 | 0.335025 |
| ATP6V1B1 | 0.632486 | -0.2853  | 0.830965 |
| FOLR1    | 0.484237 | -0.39939 | 0.735105 |
| ATF2     | 0.431857 | -0.26413 | 0.69689  |
| UCHL3    | 0.675324 | 0.124685 | 0.853175 |
| CD19     | 0.219226 | 0.524014 | 0.516997 |
| FOSL1    | 0.601315 | 0.333056 | 0.811336 |
| FOSL2    | 0.038135 | 1.319422 | 0.233804 |
| HPGD     | 0.068934 | -1.68316 | 0.306571 |
| VAV1     | 0.090665 | 0.267128 | 0.343901 |
| ELN      | 0.370966 | 0.781927 | 0.65423  |
| CSF2RA   | 0.405645 | 0.525102 | 0.679973 |

|          |          |          |          |
|----------|----------|----------|----------|
| AREG     | 0.632486 | -0.2543  | 0.830965 |
| CD46     | 0.511623 | 0.028171 | 0.754376 |
| NME1     | 0.027821 | 0.387965 | 0.202072 |
| NQO1     | 0.72202  | -0.35673 | 0.876654 |
| GNS      | 0.689846 | -0.12072 | 0.859429 |
| VEGFA    | 0.282684 | 0.880682 | 0.585849 |
| PHKG2    | 0.784254 | 0.471362 | 0.909506 |
| IGLL1    | 0.677737 | -0.23904 | 0.854568 |
| ARSB     | 0.000487 | 1.534509 | 0.020212 |
| RPS2     | 0.637197 | -0.05364 | 0.833511 |
| CHN1     | 0.259792 | 0.536071 | 0.563204 |
| ST6GAL1  | 0.263545 | 0.30569  | 0.565873 |
| DSP      | 0.709387 | 0.301606 | 0.869179 |
| RPA2     | 0.33388  | 0.09392  | 0.620902 |
| MUC1     | 0.704483 | -0.07628 | 0.867291 |
| COX7C    | 0.205836 | -0.77667 | 0.500256 |
| TIMP2    | 0.000177 | 1.785017 | 0.009596 |
| ALOX15   | 0.961061 | -0.10859 | 0.99427  |
| NPR1     | 0.771215 | 0.150087 | 0.903336 |
| CD44     | 0.26355  | 0.116306 | 0.565873 |
| NQO2     | 0.230765 | -0.72047 | 0.531771 |
| H2AFX    | 0.53908  | -0.81833 | 0.774975 |
| SELP     | 0.792554 | 0.176552 | 0.913596 |
| ACAN     | 0.174607 | 1.036503 | 0.466796 |
| ITGB4    | 0.103963 | -0.53866 | 0.366863 |
| SPN      | 0.699289 | -0.39407 | 0.864146 |
| CBR1     | 0.419078 | -0.16216 | 0.688796 |
| ANK1     | 0.112657 | -0.80709 | 0.382523 |
| HLA-A    | 0.708594 | 0.282262 | 0.869179 |
| HLA-A    | 0.004571 | 2.59254  | 0.078202 |
| HLA-A    | 0.322009 | 0.139647 | 0.613139 |
| ACADS    | 0.280828 | -0.26336 | 0.583434 |
| CREB1    | 0.827685 | 0.107023 | 0.932533 |
| PDGFRA   | 0.000946 | 2.067907 | 0.029388 |
| SLC25A16 | 0.970732 | 0.374443 | 0.997592 |
| GLB1     | 0.017412 | 0.339609 | 0.159467 |
| PECAM1   | 0.646644 | -0.19405 | 0.837353 |
| PPP3CB   | 0.117194 | 0.656615 | 0.389929 |
| NCK1     | 0.010791 | 0.408547 | 0.126291 |
| GCFC2    | 0.123336 | 1.001472 | 0.399387 |
| KCNA2    | 0.52703  | -0.27243 | 0.766596 |
| HIST1H1B | 0.486499 | 0.106859 | 0.73612  |
| HIST1H1D | 0.311297 | -0.20183 | 0.609894 |
| HIST1H1C | 0.194929 | -0.5497  | 0.488911 |
| EPCAM    | 0.426712 | -0.28867 | 0.693599 |
| POR      | 0.613839 | -0.1073  | 0.819264 |
| ABO      | 0.963521 | 0.012178 | 0.995937 |
| DPEP1    | 0.55076  | 0.751923 | 0.781335 |
| EPB42    | 0.197108 | -0.64105 | 0.490309 |
| MGMT     | 0.047465 | 0.298615 | 0.255923 |
| FER      | 0.003319 | 1.58745  | 0.065611 |
| ATP2A2   | 0.028771 | 0.25057  | 0.204946 |
| CD36     | 0.177302 | -0.80897 | 0.468602 |
| CPE      | 0.749559 | 0.37794  | 0.891418 |
| IL7R     | 0.651513 | 0.0679   | 0.839222 |
| PLCG2    | 0.537409 | 0.250935 | 0.773175 |
| FAH      | 0.199513 | -0.30125 | 0.49217  |
| STMN1    | 0.060574 | 0.410438 | 0.287134 |

|         |          |          |          |
|---------|----------|----------|----------|
| YBX3    | 0.006382 | 0.716563 | 0.094501 |
| ZFX     | 0.33939  | 0.444368 | 0.626528 |
| ZNF22   | 0.142182 | -0.89784 | 0.428816 |
| ZNF24   | 0.723762 | 0.17468  | 0.876654 |
| ZKSCAN1 | 0.018918 | 1.508742 | 0.166597 |
| ZNF3    | 0.96804  | 0.020592 | 0.997541 |
| NAGA    | 0.04896  | 0.602666 | 0.259694 |
| HSPA6   | 0.188132 | -1.07536 | 0.480067 |
| RHOQ    | 0.116614 | 0.813312 | 0.38945  |
| HMGA1   | 0.077655 | 0.545561 | 0.324641 |
| ZNF8    | 0.614841 | -0.04307 | 0.820298 |
| TMEM11  | 0.646635 | -0.07481 | 0.837353 |
| GOT1    | 0.709387 | 0.219362 | 0.869179 |
| IFNAR1  | 0.05424  | 0.692982 | 0.273313 |
| BPI     | 0.322509 | 0.68752  | 0.613498 |
| PRKCA   | 0.646644 | 0.101285 | 0.837353 |
| JUNB    | 0.086532 | 1.221404 | 0.337307 |
| ITGA2   | 0.076552 | 0.372301 | 0.322705 |
| GJA1    | 3.76E-07 | 3.214824 | 6.96E-05 |
| NPR3    | 0.005445 | 2.092178 | 0.086993 |
| SMPD1   | 0.9866   | -0.07689 | 1        |
| UBTF    | 0.44615  | 0.095332 | 0.706795 |
| AKR1C4  | 1        | -0.05265 | 1        |
| JUND    | 0.462026 | -0.1248  | 0.718747 |
| CKMT2   | 0.520746 | -0.62586 | 0.761048 |
| ATF7    | 0.345818 | 0.542878 | 0.632498 |
| NDUFB7  | 0.354042 | -0.31123 | 0.638094 |
| PRKACA  | 0.546147 | -0.08531 | 0.778738 |
| CAPN2   | 0.784286 | 0.01363  | 0.909506 |
| DES     | 0.199508 | -0.65564 | 0.49217  |
| CEBPB   | 0.192599 | 0.721324 | 0.486094 |
| GAP43   | 0.043559 | 1.448157 | 0.247494 |
| HLA-G   | 0.576975 | 0.20052  | 0.796634 |
| PTPN2   | 0.724167 | -0.01827 | 0.876654 |
| CTPS1   | 0.934288 | 0.080678 | 0.984157 |
| ENG     | 0.374984 | -0.10831 | 0.656862 |
| DDX5    | 0.032856 | 0.239663 | 0.217297 |
| PFKL    | 0.164991 | 0.173744 | 0.454525 |
| GM2A    | 0.434427 | -0.01555 | 0.698194 |
| CR1     | 0.795534 | 0.11792  | 0.914405 |
| LGALS3  | 0.012773 | -0.40499 | 0.137944 |
| IGFBP3  | 0.000586 | 2.224356 | 0.022558 |
| SPI1    | 0.808416 | 0.160378 | 0.921586 |
| FLT1    | 0.408836 | 0.404781 | 0.681762 |
| PSMC3   | 0.069183 | 0.203942 | 0.306571 |
| TCP1    | 0.76912  | 0.038305 | 0.901915 |
| PTPN1   | 0.301936 | 0.183293 | 0.603275 |
| ALOX12  | 0.312494 | 0.267334 | 0.610732 |
| IGFBP2  | 0.627465 | 0.505677 | 0.828932 |
| ERCC2   | 0.011635 | 0.632928 | 0.129699 |
| RPL35A  | 0.684992 | -0.23277 | 0.85709  |
| ITGB5   | 4.93E-06 | 0.750068 | 0.000552 |
| ARF4    | 0.450097 | 0.124294 | 0.709598 |
| RPL7    | 0.913333 | -0.10291 | 0.975706 |
| EGR1    | 0.992139 | 0.052148 | 1        |
| VCL     | 0.039276 | 0.233313 | 0.236232 |
| GPX2    | 0.73657  | -0.42443 | 0.884985 |
| LBP     | 0.04253  | 0.674358 | 0.243142 |



|          |          |          |          |
|----------|----------|----------|----------|
| PTPRA    | 0.830256 | -0.0966  | 0.933615 |
| NAT1     | 0.00094  | 0.799635 | 0.02929  |
| HLA-B    | 0.967597 | -0.12443 | 0.997177 |
| IL1RN    | 0.069387 | 1.764335 | 0.307215 |
| ITGB6    | 0.12513  | 0.417237 | 0.401334 |
| RHCE     | 0.347401 | -0.70815 | 0.632785 |
| SON      | 0.069183 | 0.357454 | 0.306571 |
| NELFE    | 0.396553 | -0.16915 | 0.67382  |
| RPL17    | 0.422885 | 0.061778 | 0.691467 |
| LAG3     | 0.711083 | -0.11022 | 0.870136 |
| PGAM1    | 0.247021 | 0.195055 | 0.549922 |
| RCC1     | 0.434427 | -0.22458 | 0.698194 |
| SDC1     | 0.118764 | 0.666991 | 0.392409 |
| ATF1     | 0.393617 | 0.294674 | 0.671013 |
| ATF6     | 0.017606 | 0.713668 | 0.160979 |
| LIG1     | 0.177273 | 0.556118 | 0.468602 |
| ATP5J    | 0.646644 | -0.07859 | 0.837353 |
| XRCC1    | 0.276436 | 0.224442 | 0.579677 |
| KRT15    | 0.511583 | 0.362187 | 0.754376 |
| KRT4     | 0.822286 | -0.1158  | 0.929187 |
| PAM      | 0.042724 | 0.793844 | 0.244126 |
| CDH2     | 0.198062 | 0.606765 | 0.491653 |
| TSPAN8   | 0.036027 | -1.68115 | 0.227287 |
| GNAZ     | 0.657906 | -0.24876 | 0.842898 |
| MYL12A   | 0.331588 | -0.14424 | 0.619341 |
| PLCG1    | 0.003297 | 0.844846 | 0.065524 |
| UGT1A6   | 0.58062  | 0.176933 | 0.797998 |
| CD58     | 0.941876 | 0.437058 | 0.988208 |
| VCAM1    | 5.07E-09 | 2.456223 | 2.81E-06 |
| NCL      | 0.825116 | 0.023298 | 0.930395 |
| HK1      | 0.422885 | 0.142263 | 0.691467 |
| POLR2C   | 0.09193  | 0.269216 | 0.345626 |
| POLR2E   | 0.627809 | -0.09843 | 0.828932 |
| NDUFV2   | 0.572777 | -0.11041 | 0.794481 |
| TNFRSF1A | 0.513135 | 0.290592 | 0.75581  |
| GGT1     | 0.563704 | -0.64489 | 0.789479 |
| ERCC3    | 0.554917 | 0.054914 | 0.783439 |
| TRIM21   | 0.892438 | 0.030339 | 0.966699 |
| TFEB     | 0.210743 | 0.863825 | 0.506632 |
| EIF2AK2  | 0.027356 | 0.309685 | 0.199874 |
| TFE3     | 0.53548  | 0.352295 | 0.772704 |
| SRM      | 0.063339 | 0.79289  | 0.294055 |
| SLC9A1   | 0.131753 | 0.571564 | 0.413476 |
| ORM2     | 0.011419 | 0.814964 | 0.128971 |
| CSNK2A2  | 0.006009 | 0.340811 | 0.090802 |
| RXRA     | 0.739804 | -0.09427 | 0.886374 |
| AOC1     | 0.909519 | 0.098093 | 0.974541 |
| ITIH2    | 0.192667 | 0.261798 | 0.486094 |
| ITIH1    | 0.055344 | 0.55751  | 0.274516 |
| CEL      | 0.711083 | -0.11522 | 0.870136 |
| NFKB1    | 0.825116 | -0.00171 | 0.930395 |
| CXCL2    | 0.163438 | -0.34129 | 0.453012 |
| NCF2     | 0.171096 | 0.336729 | 0.461822 |
| FST      | 0.09909  | 0.441736 | 0.358568 |
| PI3      | 0.571349 | 0.16493  | 0.793891 |
| TYMP     | 0.367925 | 0.126575 | 0.650718 |
| ATP2B1   | 0.835403 | 0.076659 | 0.935999 |
| CR2      | 0.349041 | -0.33481 | 0.635145 |

|              |          |          |          |
|--------------|----------|----------|----------|
| HLA-DPA1     | 0.490639 | -0.2838  | 0.738656 |
| HLA-DRB1     | 0.354055 | -0.45748 | 0.638094 |
| EIF2S2       | 0.257958 | 0.173831 | 0.560462 |
| TCN1         | 0.953347 | -0.24935 | 0.993074 |
| TCN2         | 0.027053 | 1.304905 | 0.198967 |
| ANXA7        | 0.478274 | 0.049843 | 0.730754 |
| SDS          | 0.072924 | 1.454421 | 0.315444 |
| CD33         | 0.152875 | 0.993597 | 0.443165 |
| PGC          | 0.066898 | -1.90728 | 0.302058 |
| SPINK2       | 0.988991 | 0.010489 | 1        |
| AZU1         | 0.952602 | 0.245634 | 0.993074 |
| TBP          | 0.889539 | -0.75493 | 0.966106 |
| TPSB2;TPSAB1 | 0.364426 | -0.38494 | 0.646996 |
| CCNA2        | 0.556057 | 0.083468 | 0.783439 |
| POU3F2       | 0.384917 | 0.407802 | 0.664306 |
| CD22         | 0.336183 | 0.358271 | 0.623617 |
| BTF3         | 0.252448 | 0.250376 | 0.555643 |
| ALOX5AP      | 0.364413 | 0.162854 | 0.646996 |
| TNFRSF1B     | 0.370989 | -0.3019  | 0.65423  |
| RAB3A        | 0.380367 | -0.61306 | 0.661698 |
| RAB3B        | 0.001647 | 1.814393 | 0.041898 |
| RAB4A        | 0.135171 | 0.283078 | 0.417833 |
| RAB5A        | 0.604602 | 0.069895 | 0.813002 |
| RAB6A        | 0.094502 | 0.227692 | 0.349959 |
| PVALB        | 0.99433  | -0.08193 | 1        |
| MSH3         | 0.944775 | 0.063171 | 0.988547 |
| MX1          | 0.71923  | 0.150959 | 0.874478 |
| MX2          | 0.378546 | 0.38341  | 0.659304 |
| NPR2         | 0.019784 | 0.738    | 0.1684   |
| PSMB1        | 0.454064 | 0.164581 | 0.712914 |
| M6PR         | 0.613839 | 0.118411 | 0.819264 |
| COX5A        | 0.498977 | 0.063875 | 0.744839 |
| LMNB1        | 0.09581  | 0.214086 | 0.352331 |
| ITGAL        | 0.563832 | -0.25332 | 0.789479 |
| ITGAX        | 0.171096 | 0.378373 | 0.461822 |
| DDC          | 0.012197 | 1.766374 | 0.134208 |
| GZMH         | 0.48945  | -0.42329 | 0.738656 |
| HOXA5        | 0.2683   | 0.445027 | 0.570935 |
| PZP          | 0.661409 | 0.14708  | 0.844736 |
| BCL3         | 0.429721 | 0.436609 | 0.695651 |
| OGN          | 0.997369 | 0.089868 | 1        |
| CAST         | 0.204174 | 0.319898 | 0.497963 |
| CYP3A5       | 0.167504 | -0.75577 | 0.457358 |
| HNF1A        | 0.651513 | 0.134929 | 0.839222 |
| EFNA1        | 0.15375  | -1.06585 | 0.444304 |
| IMPDH1       | 0.286754 | 0.165608 | 0.590053 |
| COL9A1       | 0.571349 | 0.020508 | 0.793891 |
| C4BPB        | 0.311006 | 1.090194 | 0.609894 |
| COL5A1       | 3.59E-06 | 1.403138 | 0.000424 |
| FLG          | 0.190786 | 0.286389 | 0.484103 |
| AGA          | 0.92904  | 0.18345  | 0.983115 |
| RASA1        | 0.046368 | 0.456039 | 0.253584 |
| PTMS         | 0.317644 | 0.683042 | 0.613139 |
| CD247        | 0.131823 | 1.031056 | 0.413476 |
| FUT3         | 0.090007 | 1.390862 | 0.343044 |
| PTN          | 0.810266 | -0.12914 | 0.921889 |
| GSTM3        | 0.819984 | 0.301387 | 0.92687  |
| ATP6V1B2     | 0.71923  | 0.061524 | 0.874478 |

|           |          |           |          |
|-----------|----------|-----------|----------|
| ATP6V1C1  | 0.027821 | 0.267143  | 0.202072 |
| CSRP1     | 0.023466 | 0.39102   | 0.184845 |
| FLNA      | 2.32E-05 | 0.493855  | 0.001908 |
| NF1       | 0.003228 | 0.711668  | 0.065092 |
| MAOA      | 0.000412 | -1.17614  | 0.018066 |
| ACO1      | 0.651389 | 0.124695  | 0.839222 |
| S1PR1     | 0.40269  | 0.197368  | 0.678038 |
| FPR1      | 0.062548 | 1.237302  | 0.292586 |
| SYT1      | 0.632486 | -0.16139  | 0.830965 |
| TNFAIP3   | 0.708254 | -0.22112  | 0.869179 |
| KITLG     | 0.781668 | -0.16166  | 0.908746 |
| NT5E      | 0.478274 | 0.183618  | 0.730754 |
| TAF1      | 0.427818 | 0.356993  | 0.69482  |
| GPD1      | 0.153234 | -1.25158  | 0.443165 |
| EPHA1     | 0.289583 | 0.454201  | 0.593134 |
| C5AR1     | 0.035269 | 1.790367  | 0.224243 |
| MDK       | 0.482372 | 0.369701  | 0.733586 |
| MSR1      | 0.00069  | 1.054059  | 0.024536 |
| VDAC1     | 0.0334   | 0.298787  | 0.219585 |
| BGN       | 0.185996 | 0.2532    | 0.478129 |
| CD72      | 0.771591 | 0.123036  | 0.903336 |
| ERBB3     | 0.723742 | -0.10996  | 0.876654 |
| SDHB      | 0.918567 | 0.013022  | 0.978657 |
| CD9       | 0.637197 | 0.150716  | 0.833511 |
| MATN1     | 0.40269  | 0.221891  | 0.678038 |
| BCKDHB    | 0.093209 | -0.32547  | 0.347256 |
| COMT      | 0.627809 | 0.054726  | 0.828932 |
| TGM2      | 0.835403 | 0.064029  | 0.935999 |
| BMP5      | 0.853939 | 0.087918  | 0.946993 |
| MUT       | 0.944783 | -7.38E-05 | 0.988547 |
| OSBP      | 0.665709 | 0.058115  | 0.847351 |
| PCMT1     | 0.856059 | -0.02824  | 0.946993 |
| FUT4      | 0.995277 | -0.09121  | 1        |
| FBL       | 0.72417  | 0.009496  | 0.876654 |
| RPS4Y1    | 0.826337 | -0.14639  | 0.93133  |
| GART      | 0.12841  | 0.100011  | 0.407846 |
| TNXB      | 0.011419 | -1.16529  | 0.128971 |
| CDH3      | 0.028235 | 1.453956  | 0.203235 |
| PAICS     | 0.266378 | 0.226004  | 0.568807 |
| ACHE      | 0.517148 | 0.268151  | 0.75923  |
| IDS       | 0.94367  | 0.165646  | 0.988547 |
| SCP2      | 0.33388  | -0.17789  | 0.620902 |
| UBA1      | 0.804634 | 0.077682  | 0.918848 |
| GPX3      | 0.046732 | 0.442441  | 0.254194 |
| NME2      | 0.049723 | 0.261783  | 0.261364 |
| ENPP1     | 3.95E-07 | 3.984021  | 7.07E-05 |
| USF1      | 0.804204 | 0.396911  | 0.918848 |
| SPRR1B    | 0.339213 | -0.33889  | 0.626409 |
| FDXR      | 0.404052 | -0.2441   | 0.678271 |
| FGFR3     | 0.756615 | -0.05785  | 0.896333 |
| PRKACG    | 0.54223  | 0.437142  | 0.775607 |
| HNRNPA2B1 | 0.939534 | 0.005344  | 0.986498 |
| RFX1      | 0.402151 | 0.382587  | 0.678038 |
| CALB2     | 0.196229 | 1.065215  | 0.490309 |
| CBL       | 0.201809 | 0.547168  | 0.495032 |
| IGFBP4    | 0.118709 | 0.823648  | 0.392409 |
| PRKACB    | 0.404026 | 0.129985  | 0.678271 |
| UQCRC2    | 0.856059 | 0.034127  | 0.946993 |

|           |          |          |          |
|-----------|----------|----------|----------|
| SLC2A5    | 0.046434 | 1.391696 | 0.253695 |
| TGM1      | 0.041397 | 0.373714 | 0.240826 |
| NR4A1     | 0.329349 | -0.1921  | 0.619341 |
| CA4       | 0.023824 | -2.17873 | 0.186463 |
| GNLY      | 0.901067 | -0.3554  | 0.971583 |
| AADAC     | 0.104774 | -0.85808 | 0.368787 |
| CPN2      | 0.194194 | 1.016689 | 0.488835 |
| FECH      | 0.330591 | -0.11699 | 0.619341 |
| PROZ      | 0.444016 | 0.363933 | 0.705729 |
| MMP8      | 0.283267 | 0.848096 | 0.586688 |
| MRC1      | 0.411524 | 0.100094 | 0.683152 |
| XPA       | 0.445334 | 0.433104 | 0.706795 |
| IGHV1-2   | 0.22215  | 0.448483 | 0.520592 |
| CES1      | 0.684992 | 0.24245  | 0.85709  |
| FBLN1     | 6.25E-07 | 0.996387 | 0.000103 |
| TCEA1     | 0.950035 | 0.070179 | 0.990863 |
| PTGS1     | 0.022281 | 0.498281 | 0.179329 |
| ITGA6     | 0.211314 | -0.3505  | 0.506632 |
| SFPQ      | 0.241676 | 0.149212 | 0.544139 |
| TUBG1     | 0.006255 | 0.318791 | 0.093377 |
| KEL       | 0.329349 | -0.16402 | 0.619341 |
| PIIB      | 0.06524  | 0.223923 | 0.298136 |
| S100A1    | 0.283495 | -0.72464 | 0.586874 |
| HRC       | 0.338364 | -0.28838 | 0.62557  |
| KAL1      | 0.383013 | -0.47204 | 0.662548 |
| ME2       | 0.208914 | 0.164535 | 0.503054 |
| GLDC      | 0.664073 | 0.307719 | 0.847289 |
| WARS      | 0.641914 | -0.02355 | 0.835764 |
| RPS3      | 0.252448 | 0.094178 | 0.555643 |
| GCSH      | 0.078768 | 0.232956 | 0.32578  |
| RPS6KB1   | 0.018342 | 1.057091 | 0.163766 |
| JAK1      | 0.103963 | 0.345608 | 0.366863 |
| PTPRB     | 0.131823 | 0.522942 | 0.413476 |
| PTPRD     | 0.547409 | 0.341218 | 0.779573 |
| PTPRE     | 0.389353 | -0.22979 | 0.667643 |
| PTPRG     | 0.558151 | -0.00903 | 0.785989 |
| PTPRZ1    | 0.676056 | 0.260589 | 0.853516 |
| SP100     | 0.415291 | -0.22257 | 0.686028 |
| MCC       | 0.05225  | 1.092362 | 0.26792  |
| TNFSF4    | 0.730466 | 0.155594 | 0.880704 |
| NFYA      | 0.386701 | 0.562044 | 0.665564 |
| AHCY      | 0.794443 | 0.04201  | 0.913708 |
| HIST1H2BO | 0.272021 | 0.930051 | 0.575039 |
| CFL1      | 0.292763 | 0.065558 | 0.595788 |
| EIF4B     | 0.26355  | 0.148655 | 0.565873 |
| F8A1      | 0.03232  | 0.491353 | 0.215938 |
| ATP2B4    | 0.609213 | 0.078877 | 0.816529 |
| ITPKA     | 0.118152 | 0.626571 | 0.392409 |
| DGKA      | 0.000207 | 0.724562 | 0.010881 |
| CPT2      | 0.171096 | -0.20907 | 0.461822 |
| DTYMK     | 0.604602 | -0.11164 | 0.813002 |
| RRM1      | 0.026397 | 1.121848 | 0.195939 |
| CMA1      | 0.093822 | -0.91727 | 0.349072 |
| LAMA2     | 0.430555 | -0.56309 | 0.695651 |
| FCAR      | 0.531576 | 0.306262 | 0.770378 |
| PRTN3     | 0.637197 | 0.039137 | 0.833511 |
| COX7A1    | 0.089309 | 0.92355  | 0.341477 |
| MMP11     | 1.13E-07 | 4.470569 | 2.62E-05 |

|        |          |          |          |
|--------|----------|----------|----------|
| CCND1  | 0.53317  | -0.24728 | 0.7709   |
| CHM    | 0.036734 | 1.319767 | 0.229759 |
| KDELR1 | 0.228659 | 0.56756  | 0.528484 |
| IL4R   | 0.167109 | 0.24516  | 0.457139 |
| CYP3A7 | 0.331588 | -0.13949 | 0.619341 |
| NR2F2  | 0.165495 | 0.918695 | 0.455554 |
| EDNRB  | 0.08528  | -0.45972 | 0.335537 |
| EEF1B2 | 0.09193  | 0.203558 | 0.345626 |
| ATP5F1 | 0.876815 | 0.041311 | 0.958859 |
| TBXAS1 | 0.030249 | 0.45259  | 0.209418 |
| AKAP5  | 0.659827 | 0.22841  | 0.844596 |
| IGFBP6 | 0.011985 | 1.617729 | 0.13253  |
| IGFBP5 | 0.001043 | 2.063795 | 0.031434 |
| ACP1   | 0.97106  | -0.10637 | 0.997592 |
| PRKCH  | 0.562382 | -0.05242 | 0.789479 |
| ACAT1  | 0.000101 | -0.62654 | 0.006359 |
| TNC    | 0.00094  | 0.998948 | 0.02929  |
| MYL9   | 0.001243 | 0.607276 | 0.034693 |
| DNASE1 | 0.571349 | 0.002332 | 0.793891 |
| CCNC   | 0.039166 | 1.52871  | 0.236232 |
| POLR2A | 0.025131 | 0.360841 | 0.191949 |
| CDK2   | 0.05702  | 0.856538 | 0.278658 |
| CXCR2  | 0.49063  | -0.26441 | 0.738656 |
| APC    | 0.19838  | 0.736623 | 0.49217  |
| COL8A2 | 0.000508 | 2.81996  | 0.02064  |
| FPR3   | 0.34386  | 0.67542  | 0.630156 |
| FPR2   | 0.976387 | -0.05924 | 0.998921 |
| ADRBK1 | 0.2958   | 0.071034 | 0.598344 |
| EDNRA  | 0.281331 | 0.441188 | 0.583877 |
| PTAFR  | 0.671419 | 0.254778 | 0.851247 |
| ACKR3  | 0.594656 | -0.02896 | 0.806337 |
| F2R    | 0.04021  | 1.328323 | 0.239722 |
| MPZ    | 0.447034 | 0.290183 | 0.707261 |
| MCM3   | 0.002838 | 1.017412 | 0.060074 |
| NFYB   | 0.905076 | -0.64923 | 0.972966 |
| AZGP1  | 0.646644 | -0.16581 | 0.837353 |
| MPST   | 0.913333 | 0.106    | 0.975706 |
| LAMA1  | 0.72009  | -0.23988 | 0.875395 |
| RPS12  | 0.145824 | 0.131965 | 0.434185 |
| BRD2   | 0.190156 | 0.506942 | 0.483515 |
| FAS    | 0.992106 | -0.42972 | 1        |
| YY1    | 0.149515 | 0.308942 | 0.438811 |
| DNAJB1 | 0.249724 | 0.141781 | 0.552833 |
| DNAJB2 | 0.43249  | -0.14819 | 0.697404 |
| ATP5A1 | 0.923804 | 0.036027 | 0.980751 |
| CTSS   | 0.76912  | 0.06574  | 0.901915 |
| PSMA1  | 0.581788 | 0.009852 | 0.797998 |
| PSMA2  | 0.33719  | 0.103224 | 0.624371 |
| PSMA3  | 0.050495 | 0.246079 | 0.263221 |
| PSMA4  | 0.908103 | 0.063245 | 0.9734   |
| S100P  | 0.884477 | -0.0243  | 0.963599 |
| COL5A3 | 0.05583  | 1.192014 | 0.276127 |
| CD40   | 0.166967 | 0.660244 | 0.457139 |
| NFKBIA | 0.628642 | 0.322481 | 0.829728 |
| ITGA3  | 0.071226 | -0.50778 | 0.311134 |
| ITGB7  | 0.915881 | 0.067232 | 0.977664 |
| ITGB8  | 0.055226 | 1.009259 | 0.274516 |
| PTX3   | 0.138795 | -0.78257 | 0.424305 |

|         |          |          |          |
|---------|----------|----------|----------|
| MSN     | 0.213733 | -0.12973 | 0.509228 |
| PTPN3   | 0.624796 | 0.337147 | 0.827713 |
| DDX6    | 0.058787 | 0.236667 | 0.283235 |
| CTNNA2  | 0.744977 | -0.31476 | 0.888646 |
| DNMT1   | 0.112657 | 0.723532 | 0.382523 |
| U2AF2   | 0.04253  | 0.246626 | 0.243142 |
| RPL13   | 0.923804 | -0.02047 | 0.980751 |
| CHML    | 0.414056 | 0.251333 | 0.685923 |
| IVD     | 0.00344  | -0.52351 | 0.067417 |
| S100A4  | 0.031269 | 0.312408 | 0.212999 |
| MGAT1   | 0.017726 | 0.420118 | 0.161012 |
| HMGB2   | 0.819984 | 0.074538 | 0.92687  |
| PTBP1   | 0.036237 | 0.195716 | 0.227448 |
| TARS    | 0.044589 | 0.389402 | 0.24851  |
| VARS    | 0.840557 | -0.02974 | 0.939212 |
| EEF1G   | 0.382127 | 0.083293 | 0.661698 |
| ZFP36   | 0.312494 | 0.359202 | 0.610732 |
| PLN     | 0.137489 | 0.790296 | 0.422524 |
| CD27    | 0.349723 | 0.6115   | 0.635657 |
| FKBP2   | 0.26355  | -0.1741  | 0.565873 |
| MST1    | 0.041032 | 1.425374 | 0.240826 |
| IL3RA   | 0.568515 | -0.28734 | 0.791838 |
| CNTFR   | 0.549913 | -0.29698 | 0.781327 |
| STOM    | 0.78936  | 0.044602 | 0.911483 |
| AK4     | 0.067173 | 1.341694 | 0.302058 |
| PON1    | 0.646644 | 0.24999  | 0.837353 |
| ANXA13  | 0.045488 | -0.68288 | 0.250872 |
| MAOB    | 0.031791 | -0.42896 | 0.214212 |
| YWHAQ   | 0.075462 | 0.254496 | 0.320055 |
| MAPK3   | 0.094502 | 0.257872 | 0.349959 |
| MARK3   | 0.221006 | 0.585939 | 0.519064 |
| ATP6V0C | 0.35106  | 0.829754 | 0.636211 |
| CALML3  | 0.019188 | 1.467002 | 0.166914 |
| DPP4    | 0.263524 | 0.635182 | 0.565873 |
| ARNT    | 0.123729 | 0.672395 | 0.399616 |
| CERS1   | 0.992139 | 0.015636 | 1        |
| RPL10   | 0.637197 | -0.17524 | 0.833511 |
| COL8A1  | 0.002545 | 1.601614 | 0.055387 |
| RPA1    | 0.023873 | 0.260321 | 0.186463 |
| APEX1   | 0.301936 | 0.217392 | 0.603275 |
| CD82    | 0.279358 | -0.30439 | 0.58196  |
| DCK     | 0.096798 | 0.70532  | 0.354489 |
| CAD     | 0.001913 | 0.465164 | 0.046318 |
| CALR    | 0.604602 | 0.080906 | 0.813002 |
| PDE4A   | 0.22359  | 0.240298 | 0.521792 |
| MAP4    | 0.000985 | 0.523328 | 0.030181 |
| CANX    | 0.1882   | 0.168379 | 0.480067 |
| CFP     | 0.039579 | 0.957874 | 0.237431 |
| PIK3R1  | 0.32085  | 0.360079 | 0.613139 |
| ITPKB   | 0.498494 | 0.261892 | 0.744839 |
| AOAH    | 0.026897 | 1.009502 | 0.198225 |
| PSMB8   | 0.595428 | -0.02374 | 0.806337 |
| PSMB9   | 0.76912  | -0.13339 | 0.901915 |
| PSMA5   | 0.537409 | 0.143367 | 0.773175 |
| HLA-DMA | 0.010388 | 0.813683 | 0.123374 |
| HLA-DMB | 0.908102 | 0.084036 | 0.9734   |
| PSMB4   | 0.179497 | 0.307754 | 0.471072 |
| PSMB6   | 0.478274 | 0.092055 | 0.730754 |

|          |          |          |          |
|----------|----------|----------|----------|
| PSMB5    | 0.036828 | 0.577624 | 0.229759 |
| GSTM2    | 0.908103 | 0.216615 | 0.9734   |
| ABCD3    | 0.774166 | -0.04982 | 0.903913 |
| TMOD1    | 0.192624 | -0.25451 | 0.486094 |
| SSFA2    | 0.094493 | -0.66138 | 0.349959 |
| LOX      | 1.07E-06 | 3.682012 | 0.000157 |
| CST5     | 0.967597 | -0.26671 | 0.997177 |
| PEX2     | 0.851845 | 0.139082 | 0.945727 |
| CHAT     | 0.189699 | -0.70025 | 0.483002 |
| ACADL    | 0.036802 | -1.77644 | 0.229759 |
| NDUFS1   | 0.327323 | 0.116121 | 0.617719 |
| ADH6     | 0.638802 | 0.146214 | 0.834211 |
| POLD1    | 0.063332 | 0.505022 | 0.294055 |
| TEAD1    | 0.06969  | 1.147892 | 0.308062 |
| SMARCA1  | 0.148574 | 0.539427 | 0.438051 |
| MAPK1    | 0.511623 | 0.044544 | 0.754376 |
| GCA      | 1        | -0.16134 | 1        |
| RXRB     | 0.609213 | -0.13926 | 0.816529 |
| ERCC5    | 0.003305 | 1.112809 | 0.065524 |
| GRN      | 0.918567 | -0.04557 | 0.978657 |
| PTPRM    | 0.549997 | -0.15894 | 0.781327 |
| LAP3     | 0.804634 | 0.101276 | 0.918848 |
| HSD11B1  | 0.016869 | -1.36393 | 0.156962 |
| CD34     | 0.001572 | -2.15775 | 0.040825 |
| CD38     | 0.955289 | -0.30524 | 0.993074 |
| CD1C     | 0.071188 | 1.39937  | 0.311134 |
| S100A2   | 0.890235 | 0.223737 | 0.966389 |
| GTF2E1   | 0.000935 | 1.449596 | 0.02929  |
| GTF2E2   | 0.019219 | 1.04985  | 0.167051 |
| PCSK1    | 0.77733  | -0.01026 | 0.906372 |
| PCSK6    | 0.410792 | 0.270959 | 0.683152 |
| TPP2     | 0.67051  | 0.026133 | 0.850681 |
| IMPA1    | 0.646644 | -0.12803 | 0.837353 |
| CTGF     | 0.059989 | 0.887847 | 0.286703 |
| EPHA2    | 0.198504 | 0.614714 | 0.49217  |
| EPHA3    | 0.937694 | 0.114403 | 0.986498 |
| EPHB2    | 0.177818 | 0.722865 | 0.469455 |
| PTPN6    | 0.799534 | 0.024635 | 0.916173 |
| SHC1     | 0.074384 | 0.300835 | 0.317894 |
| MPG      | 0.204173 | -0.08063 | 0.497963 |
| CRABP2   | 0.394814 | 0.775466 | 0.672349 |
| ARID4A   | 0.132726 | 0.853358 | 0.415416 |
| KDM5A    | 0.235662 | 0.490728 | 0.537803 |
| COL4A5   | 0.023538 | -1.54935 | 0.185053 |
| TKT      | 0.228671 | -0.23375 | 0.528484 |
| CASP1    | 0.511623 | -0.15426 | 0.754376 |
| NOS3     | 0.839554 | 0.112011 | 0.939212 |
| NOS1     | 0.897342 | -0.03102 | 0.969793 |
| SERPINB3 | 0.013461 | 2.262838 | 0.141812 |
| LMOD1    | 0.003297 | 1.005166 | 0.065524 |
| RBMS1    | 0.077978 | 1.154387 | 0.325593 |
| PML      | 0.040551 | 0.255152 | 0.240216 |
| TYK2     | 0.081727 | 0.768994 | 0.330094 |
| SERPINA4 | 0.02974  | 0.790461 | 0.208169 |
| EEF1D    | 0.364426 | 0.120043 | 0.646996 |
| OAS2     | 0.201834 | 0.238714 | 0.495032 |
| CRABP1   | 0.006202 | 2.191024 | 0.092951 |
| MARCKS   | 0.000268 | 0.783501 | 0.01304  |

|          |          |          |          |
|----------|----------|----------|----------|
| AQP1     | 0.462032 | 0.028049 | 0.718747 |
| GNA11    | 0.72417  | 0.05522  | 0.876654 |
| ALDH4A1  | 0.070198 | -0.38455 | 0.309184 |
| PBLD     | 0.045853 | -1.67307 | 0.252361 |
| ERP29    | 0.918567 | -0.03525 | 0.978657 |
| PRDX6    | 0.524435 | -0.07991 | 0.764023 |
| BLVRB    | 0.190424 | -0.20303 | 0.483515 |
| PRDX5    | 0.040551 | -0.36902 | 0.240216 |
| DDT;DDTL | 0.185996 | -0.26929 | 0.478129 |
| GCHFR    | 0.074384 | -0.44158 | 0.317894 |
| PRDX3    | 0.641914 | -0.00116 | 0.835764 |
| ATP5D    | 0.714303 | 0.237167 | 0.87164  |
| RPL12    | 0.76912  | -0.07875 | 0.901915 |
| ECHS1    | 0.503174 | -0.13575 | 0.747596 |
| CMPK1    | 0.923804 | 0.004862 | 0.980751 |
| PEBP1    | 0.404052 | -0.10211 | 0.678271 |
| PDIA3    | 0.43056  | 0.104785 | 0.695651 |
| PPP2R1A  | 0.216173 | 0.087944 | 0.512741 |
| PPP2R1B  | 0.264068 | 0.832399 | 0.566604 |
| CD6      | 0.065684 | -1.48936 | 0.299507 |
| CDC27    | 0.013739 | 0.949513 | 0.143228 |
| FCER1G   | 0.023872 | 0.771901 | 0.186463 |
| WEE1     | 0.291387 | 0.476371 | 0.595183 |
| PPIF     | 0.918566 | -0.10361 | 0.978657 |
| TM4SF1   | 0.30098  | 1.156196 | 0.602884 |
| BDKRB2   | 1        | -0.07744 | 1        |
| NKTR     | 0.119403 | 0.952295 | 0.393785 |
| NMT1     | 0.004424 | 0.419955 | 0.076312 |
| HLA-A    | 0.642217 | 0.400035 | 0.835764 |
| HLA-A    | 0.04253  | 0.717129 | 0.243142 |
| HLA-A    | 0.711134 | 0.162648 | 0.870136 |
| HLA-B    | 0.331588 | -0.23272 | 0.619341 |
| HLA-B    | 0.400928 | 0.826501 | 0.676817 |
| HLA-B    | 0.726825 | 0.289528 | 0.878607 |
| HLA-B    | 0.163438 | -0.24081 | 0.453012 |
| HLA-B    | 0.393617 | 0.341033 | 0.671013 |
| HLA-B    | 0.247021 | -0.26286 | 0.549922 |
| HLA-B    | 0.57907  | -0.18353 | 0.796675 |
| HLA-B    | 0.508688 | -0.23215 | 0.752448 |
| HLA-B    | 0.237842 | 1.376865 | 0.540554 |
| HLA-B    |          | 0        |          |
| HLA-C    | 0.286651 | 0.849987 | 0.590053 |
| HLA-C    | 0.171935 | -0.38222 | 0.463186 |
| HLA-C    | 0.220126 | -0.60601 | 0.518019 |
| HLA-C    | 0.982991 | 0.005168 | 1        |
| HLA-C    | 0.331741 | -1.09143 | 0.619465 |
| HLA-F    | 0.879415 | -0.07293 | 0.96104  |
| HMOX2    | 0.130075 | 0.18847  | 0.410899 |
| ADSS     | 0.754042 | 0.118782 | 0.894351 |
| AXL      | 0.01624  | 1.348569 | 0.154611 |
| LRPAP1   | 0.923804 | 0.078239 | 0.980751 |
| TSPO     | 0.126762 | -0.48366 | 0.403998 |
| OXTR     | 0.745146 | -0.03149 | 0.888646 |
| ADSL     | 0.084549 | 0.363213 | 0.335025 |
| PKLR     | 0.051649 | -0.81725 | 0.266309 |
| CLIP1    | 0.241676 | 0.16653  | 0.544139 |
| SRI      | 0.419078 | -0.16505 | 0.688796 |
| GNA15    | 0.776543 | -0.16686 | 0.905985 |



|          |          |          |          |
|----------|----------|----------|----------|
| GSTT1    | 0.177798 | -1.45743 | 0.469455 |
| SERPINB1 | 0.825116 | -0.10489 | 0.930395 |
| GCH1     | 0.992139 | -0.05394 | 1        |
| SLC7A1   | 0.468673 | 0.458868 | 0.723459 |
| ALDH1B1  | 1.21E-05 | 1.164009 | 0.001115 |
| ALDH3A1  | 0.040425 | -2.07659 | 0.240216 |
| POLR2B   | 0.024706 | 0.263869 | 0.190022 |
| NTS      | 0.571349 | 0.156074 | 0.793891 |
| LCN1     | 0.167109 | 0.418844 | 0.457139 |
| SDHA     | 0.739057 | 0.016611 | 0.886253 |
| CORO1A   | 0.241676 | -0.16448 | 0.544139 |
| GDI1     | 0.088177 | 0.285447 | 0.339301 |
| S100A7   | 0.277593 | 0.566467 | 0.579677 |
| MAT2A    | 0.26355  | 0.184816 | 0.565873 |
| SRD5A2   | 0.175422 | -0.51881 | 0.466796 |
| PRKAR1B  | 0.996262 | -0.07609 | 1        |
| PRKAR2B  | 0.537398 | 0.159292 | 0.773175 |
| CPS1     | 0.407707 | 0.354884 | 0.680612 |
| RRM2     | 0.187759 | 0.722318 | 0.480067 |
| CASQ1    | 0.234101 | 0.607982 | 0.535784 |
| SDC4     | 0.054497 | -0.69034 | 0.273313 |
| TIA1     | 0.000985 | 0.939651 | 0.030181 |
| FMO4     | 0.848323 | -0.09152 | 0.944084 |
| FMO3     | 0.085728 | 1.049972 | 0.335537 |
| HIVEP2   | 0.568504 | -0.22422 | 0.791838 |
| SLC6A6   | 0.6553   | -0.30319 | 0.84209  |
| SLC6A4   | 0.007122 | -1.02424 | 0.101139 |
| DNAJA1   | 0.00719  | 0.353496 | 0.101457 |
| AKT1     | 0.144006 | 0.256255 | 0.431666 |
| AKT2     | 0.546125 | 0.061336 | 0.778738 |
| IL2RG    | 0.980555 | -0.04677 | 1        |
| UQCRC1   | 0.374984 | -0.08681 | 0.656862 |
| HIBADH   | 0.754042 | 0.009718 | 0.894351 |
| ATIC     | 0.252448 | 0.193776 | 0.555643 |
| HNRNPH3  | 0.159052 | 0.236282 | 0.449897 |
| HNRNPH1  | 0.136904 | 0.193296 | 0.421544 |
| CASP14   | 0.079667 | 1.093452 | 0.325919 |
| YWHAB    | 0.142204 | 0.215701 | 0.428816 |
| SFN      | 0.164991 | -0.34725 | 0.454525 |
| STIP1    | 0.76912  | 0.006161 | 0.901915 |
| S100A11  | 0.918567 | 0.081215 | 0.978657 |
| FCGR2B   | 0.022402 | 1.874959 | 0.179917 |
| FCGR2C   | 0.109581 | 0.878597 | 0.377423 |
| CEACAM8  | 0.170642 | -1.04961 | 0.461822 |
| L1CAM    | 0.49392  | 0.423928 | 0.741997 |
| INPP5B   | 0.00763  | 1.617845 | 0.10525  |
| PRDX2    | 0.024706 | -0.32537 | 0.190022 |
| ARRB2    | 0.97106  | -0.0873  | 0.997592 |
| GK;GK3P  | 0.902877 | -0.07915 | 0.971583 |
| VIPR1    | 0.014974 | -1.06829 | 0.150049 |
| CCR1     | 0.607012 | 0.363095 | 0.81555  |
| CCR7     | 0.322009 | 0.130597 | 0.613139 |
| GPR183   | 0.01123  | 1.166916 | 0.128539 |
| CDA      | 0.156729 | 0.975261 | 0.447022 |
| DCTD     | 0.835399 | 0.002922 | 0.935999 |
| PYCR1    | 0.292764 | 0.446706 | 0.595788 |
| SLC8A1   | 0.930143 | 0.08663  | 0.983996 |
| GBP1     | 0.241676 | 0.273315 | 0.544139 |

|          |          |          |          |
|----------|----------|----------|----------|
| GBP2     | 0.09982  | 0.525042 | 0.359216 |
| ELF1     | 0.000759 | 2.350011 | 0.025904 |
| HPD      | 0.310183 | -0.43122 | 0.609864 |
| GTF2H1   | 0.000386 | 1.872205 | 0.017122 |
| STX2     | 0.000624 | 2.153972 | 0.023434 |
| DSG3     | 0.380237 | 0.42721  | 0.661698 |
| CTH      | 0.111922 | -0.94421 | 0.382523 |
| ICAM3    | 0.82506  | -0.03949 | 0.930395 |
| RPL9     | 0.02152  | 0.200812 | 0.175496 |
| CD70     | 0.980555 | 0.118959 | 1        |
| ACSL1    | 0.063339 | -0.25182 | 0.294055 |
| CDH5     | 0.094471 | -0.6416  | 0.349959 |
| KIF5B    | 0.185996 | 0.120683 | 0.478129 |
| CSTF2    | 0.112657 | 0.308189 | 0.382523 |
| LSP1     | 0.041861 | 0.370405 | 0.242066 |
| DUT      | 0.709387 | -0.02324 | 0.869179 |
| GUCY1A2  | 0.180545 | -0.75622 | 0.472575 |
| ABCC1    | 0.030755 | 0.539749 | 0.211475 |
| CKS2     | 0.291769 | 0.379417 | 0.595183 |
| S100A3   | 0.563678 | -0.15748 | 0.789479 |
| ABCD1    | 0.015071 | 0.480841 | 0.150049 |
| MAN1A1   | 0.034511 | 0.679685 | 0.222148 |
| KDELRL2  | 0.188151 | 0.607842 | 0.480067 |
| TTK      | 0.072914 | 0.510886 | 0.315444 |
| MCM4     | 0.057907 | 1.226531 | 0.280499 |
| MCM5     | 0.074381 | 0.947213 | 0.317894 |
| MCM7     | 0.266365 | 0.854599 | 0.568807 |
| GALNS    | 0.004611 | 0.589073 | 0.078316 |
| RNASE4   | 0.259673 | 0.559053 | 0.563057 |
| SDC2     | 0.641109 | 0.426322 | 0.835764 |
| CD68     | 0.154996 | 0.637212 | 0.444958 |
| SHMT1    | 0.149515 | -0.4024  | 0.438811 |
| SHMT2    | 0.000706 | 0.475627 | 0.024871 |
| EVI2B    | 0.677598 | 0.049719 | 0.854568 |
| EPHX2    | 0.071055 | -0.93928 | 0.311134 |
| HSPA4    | 0.153276 | 0.125823 | 0.443165 |
| GRK5     | 0.512056 | -0.28932 | 0.754913 |
| MPI      | 0.646644 | 0.05346  | 0.837353 |
| PRSS3    | 0.322009 | 0.128716 | 0.613139 |
| GPC1     | 4.19E-09 | 3.473083 | 2.62E-06 |
| BTC      | 0.26324  | -0.38642 | 0.565873 |
| PFN2     | 0.003627 | 0.702178 | 0.069037 |
| CA8      | 0.08745  | -0.82134 | 0.338891 |
| CTNNA1   | 0.218632 | -0.21143 | 0.515816 |
| CTNNB1   | 0.466082 | -0.10073 | 0.721065 |
| BMI1     | 0.960376 | -0.36876 | 0.994122 |
| PHB      | 0.426712 | 0.083676 | 0.693599 |
| PTPN7    | 0.46178  | -0.56052 | 0.718747 |
| SERPINB6 | 0.247021 | 0.361012 | 0.549922 |
| NF2      | 0.367923 | 0.055989 | 0.650718 |
| RDX      | 0.317645 | -0.11798 | 0.613139 |
| RPA3     | 0.208914 | 0.120644 | 0.503054 |
| SFTPD    | 0.019106 | -1.37445 | 0.166854 |
| RFC4     | 0.069183 | 0.426371 | 0.306571 |
| RFC2     | 0.131757 | 0.502516 | 0.413476 |
| RFC1     | 0.528742 | 0.262142 | 0.767576 |
| RPL22    | 0.085745 | 0.086989 | 0.335537 |
| GTF2F1   | 0.091287 | 0.645242 | 0.345435 |

|          |          |          |          |
|----------|----------|----------|----------|
| SPR      | 0.003744 | -0.5578  | 0.070138 |
| ADM      | 1        | -0.01065 | 1        |
| SPRR1A   | 0.508688 | -0.21618 | 0.752448 |
| PTGS2    | 0.001304 | 2.491704 | 0.035705 |
| APLNR    |          | 0        |          |
| THBS2    | 1.05E-08 | 3.178459 | 5.30E-06 |
| THBS4    | 0.017358 | 1.191441 | 0.159467 |
| IDUA     | 0.409636 | -0.33066 | 0.682657 |
| CLCN1    | 0.262189 | 0.377536 | 0.565636 |
| KRT9     | 0.162993 | 0.690885 | 0.453012 |
| SAA4     | 0.786058 | 0.195857 | 0.910989 |
| FBN1     | 0.008089 | 0.485631 | 0.107782 |
| FBN2     | 0.404659 | 0.563169 | 0.67885  |
| PCK1     | 0.319672 | -0.24174 | 0.613139 |
| IRS1     | 0.034088 | 1.011716 | 0.221621 |
| AGL      | 0.28378  | -0.23614 | 0.586874 |
| MYH9     | 2.54E-07 | 0.446998 | 5.31E-05 |
| MYH10    | 0.144006 | 0.360163 | 0.431666 |
| TIE1     | 0.447034 | -0.2226  | 0.707261 |
| COPB2    | 0.064284 | 0.1836   | 0.296208 |
| ACTN2    | 0.00537  | -1.31534 | 0.086604 |
| SOAT1    | 0.462056 | 0.330033 | 0.718747 |
| ADD1     | 0.918567 | 0.01126  | 0.978657 |
| ADD2     | 0.414243 | -0.29196 | 0.685923 |
| BSG      | 0.015348 | 0.365698 | 0.151713 |
| TIMP3    | 0.014135 | 0.80425  | 0.144889 |
| ADRBK2   | 0.794794 | -0.27383 | 0.913708 |
| FUS      | 0.075462 | 0.203979 | 0.320055 |
| NUP214   | 0.036237 | 0.279317 | 0.227448 |
| DEK      | 0.226131 | 0.161025 | 0.525131 |
| ATP7B    | 0.019188 | 0.746918 | 0.166914 |
| HNF1B    | 0.308073 | -0.61155 | 0.609277 |
| MYH11    | 0.442223 | 0.204993 | 0.703704 |
| GLRX     | 0.407778 | -0.21793 | 0.680612 |
| CHKA     | 0.88688  | -0.02272 | 0.96416  |
| PPM1A    | 0.330591 | -0.15711 | 0.619341 |
| IGFALS   | 0.8483   | -0.04186 | 0.944084 |
| AHR      | 0.058787 | 0.428639 | 0.283235 |
| KRT20    | 0.392489 | 0.178016 | 0.671013 |
| KRT2     | 0.090665 | 0.620206 | 0.343901 |
| HMGCL    | 0.167008 | -0.26172 | 0.457139 |
| FLT4     | 0.907445 | -0.24002 | 0.9734   |
| KDR      | 0.428964 | 0.48266  | 0.695651 |
| PSMC2    | 0.272095 | 0.108261 | 0.575039 |
| SLC16A2  | 0.121151 | 1.146121 | 0.396836 |
| CHI3L1   | 0.067835 | 1.352393 | 0.303736 |
| GGT5     | 0.155183 | 0.322983 | 0.444958 |
| GJA5     | 0.673801 | -0.33974 | 0.853    |
| ARL2     | 0.856059 | 0.078262 | 0.946993 |
| ARL3     | 0.070198 | 0.326762 | 0.309184 |
| TRIM23   | 0.568296 | -0.08785 | 0.791838 |
| MAP2K2   | 0.255193 | 0.168773 | 0.557593 |
| ZNF76    | 0.44489  | 0.251976 | 0.706713 |
| ATP5C1   | 0.660922 | 0.022269 | 0.844596 |
| ATP6V1E1 | 0.360948 | 0.077989 | 0.644411 |
| CPOX     | 0.179497 | 0.311516 | 0.471072 |
| RPL4     | 0.257958 | -0.01061 | 0.560462 |
| NUDT1    | 0.115525 | 1.024188 | 0.387731 |

|          |          |          |          |
|----------|----------|----------|----------|
| LONP1    | 0.206534 | 0.14434  | 0.500256 |
| PGM1     | 0.689846 | 0.081037 | 0.859429 |
| PPP1CC   | 0.000268 | 0.802272 | 0.01304  |
| ACVR1B   | 0.716722 | 0.065402 | 0.873394 |
| TGFB1    | 0.000451 | 2.17113  | 0.019184 |
| GNL1     | 0.073319 | 0.297361 | 0.31592  |
| LTBR     | 0.447034 | 0.298203 | 0.707261 |
| SERPINB5 | 0.048183 | 1.698635 | 0.257798 |
| POLR2I   | 0.247021 | 0.345307 | 0.549922 |
| SERPINF1 | 2.26E-05 | 1.078357 | 0.001867 |
| SREBF1   | 0.056315 | 0.469501 | 0.277104 |
| DLST     | 0.923804 | 0.046317 | 0.980751 |
| GMPR     | 0.086783 | -1.42357 | 0.337854 |
| GPX4     | 0.151386 | -0.20823 | 0.44125  |
| CFHR2    | 0.053107 | 2.041748 | 0.270063 |
| ACVRL1   | 1        | -0.20581 | 1        |
| HSD17B2  | 0.713801 | -0.45094 | 0.87164  |
| SCNN1A   | 0.69426  | 0.079807 | 0.861478 |
| SRP14    | 0.213733 | -0.40726 | 0.509228 |
| TGFB2    | 0.577365 | -0.20654 | 0.79666  |
| NUP62    | 0.015348 | 0.23795  | 0.151713 |
| HPCAL1   | 0.97632  | -0.05814 | 0.998921 |
| FDFT1    | 0.522193 | 0.447599 | 0.762942 |
| ZEB1     | 0.688686 | -0.14517 | 0.859429 |
| PIGA     | 0.247982 | 0.984191 | 0.551286 |
| TAGLN2   | 0.257958 | 0.121752 | 0.560462 |
| TALDO1   | 0.181644 | -0.23622 | 0.472575 |
| SNCA     | 0.471956 | 0.127273 | 0.726403 |
| ETFB     | 0.164991 | -0.19711 | 0.454525 |
| RBMX     | 0.637197 | 0.105403 | 0.833511 |
| BRCA1    | 0.02519  | 0.465663 | 0.192018 |
| COIL     | 0.033619 | 0.891052 | 0.220876 |
| GGCX     | 0.646641 | 0.132158 | 0.837353 |
| ITGAE    | 0.001003 | 2.357001 | 0.030576 |
| LIPA     | 0.462056 | 0.046394 | 0.718747 |
| ATP6V1A  | 0.407778 | 0.092915 | 0.680612 |
| HSPA9    | 0.960544 | 0.024737 | 0.994122 |
| EIF4A3   | 0.027356 | 0.19573  | 0.199874 |
| IGHMBP2  | 0.986528 | 0.020392 | 1        |
| RPS19    | 0.228671 | 0.07652  | 0.528484 |
| RPL3     | 0.581788 | -0.01356 | 0.797998 |
| COL15A1  | 0.577274 | 0.048259 | 0.796634 |
| COL18A1  | 0.960544 | -0.09903 | 0.994122 |
| MPV17    | 0.704475 | 0.855811 | 0.867291 |
| DDOST    | 0.075462 | 0.254984 | 0.320055 |
| ANP32A   | 0.97632  | -0.03369 | 0.998921 |
| FEN1     | 0.007333 | 0.709858 | 0.102825 |
| PLA2G5   | 0.107007 | 0.813878 | 0.371691 |
| CUX1     | 0.118765 | 0.212635 | 0.392409 |
| MMP12    | 0.00525  | 3.011296 | 0.085373 |
| CAPG     | 0.330591 | 0.168826 | 0.619341 |
| CAP2     | 0.005771 | 1.302326 | 0.089283 |
| IL6ST    | 0.168028 | -0.91671 | 0.45845  |
| GP5      | 0.421207 | 0.132165 | 0.691066 |
| CEACAM6  | 0.819807 | -0.299   | 0.92687  |
| TXLNA    | 0.0799   | 0.415375 | 0.325919 |
| CCT6A    | 0.546147 | -0.05102 | 0.778738 |
| CD79B    | 0.85486  | -0.05286 | 0.946993 |

|                 |          |          |          |
|-----------------|----------|----------|----------|
| NNMT            | 0.00049  | 1.059691 | 0.020212 |
| IFI27           | 0.404384 | -0.68034 | 0.678624 |
| PSMB10          | 0.374984 | -0.13298 | 0.656862 |
| VHL             | 0.603077 | 0.335713 | 0.812922 |
| ADH7            | 0.328863 | 0.706546 | 0.619341 |
| PBX1            | 0.018614 | 1.575352 | 0.165633 |
| PBX2            | 0.346993 | 0.741653 | 0.632606 |
| PBX3            | 0.013261 | 1.115393 | 0.141015 |
| RPL13A          | 0.944783 | -0.01748 | 0.988547 |
| ARL1            | 0.177368 | 0.201185 | 0.468602 |
| MLH1            | 0.141154 | 0.783918 | 0.427981 |
| STAT3           | 0.407778 | 0.100431 | 0.680612 |
| USP8            | 0.048948 | 0.776614 | 0.259694 |
| PEX19           | 0.103963 | 0.447247 | 0.366863 |
| MDH1            | 0.72417  | -0.06032 | 0.876654 |
| MDH2            | 0.546147 | 0.116264 | 0.778738 |
| RFC5            | 0.082195 | 0.468056 | 0.330671 |
| RFC3            | 0.494799 | 0.203178 | 0.741997 |
| HADHA           | 0.466082 | -0.05395 | 0.721065 |
| EIF2S3;EIF2S3L  | 0.533067 | 0.055323 | 0.7709   |
| LEP             | 0.683728 | -0.11242 | 0.85709  |
| ETV3            | 0.041395 | 0.855514 | 0.240826 |
| CASR            | 0.447034 | -0.32014 | 0.707261 |
| CETN2           | 0.632496 | 0.002694 | 0.830965 |
| ETV6            | 0.109616 | 0.948505 | 0.377423 |
| EIF2D           | 0.073842 | 0.643157 | 0.316943 |
| CD200           | 0.005341 | 1.004088 | 0.086344 |
| MNDA            | 0.520146 | 0.044499 | 0.760272 |
| PRPH            | 0.115488 | -0.84009 | 0.387731 |
| WNT5A           | 0.001125 | 2.570401 | 0.032731 |
| PTGDS           | 0.664722 | -0.4419  | 0.847351 |
| BUD31           | 0.192667 | 0.307712 | 0.486094 |
| UBA7            | 0.274985 | 0.223918 | 0.577625 |
| NAA10           | 0.581788 | 0.11839  | 0.797998 |
| KDM5C           | 0.024218 | 1.1203   | 0.18849  |
| PPP1R2;PPP1R2P3 | 0.255193 | 0.456221 | 0.557593 |
| CSK             | 0.442223 | 0.113926 | 0.703704 |
| PNPLA4          | 0.446222 | -0.33259 | 0.706805 |
| GARS            | 0.09581  | 0.32151  | 0.352331 |
| IARS            | 0.09982  | 0.191317 | 0.359216 |
| MAP3K8          | 0.920812 | -0.00018 | 0.98039  |
| FOLR3           | 0.540968 | 0.185739 | 0.775521 |
| SLC19A1         | 0.149142 | 0.406684 | 0.438811 |
| EIF1            | 0.794443 | -0.02485 | 0.913708 |
| CCR2            | 0.089503 | 0.572776 | 0.341477 |
| TSPAN7          | 0.066178 | -1.53971 | 0.300455 |
| PRKCI           | 0.918567 | -0.01695 | 0.978657 |
| ELK3            | 0.391415 | 0.592589 | 0.670039 |
| ACTR1B          | 0.866426 | 0.029768 | 0.953042 |
| ECI1            | 0.167008 | -0.12648 | 0.457139 |
| TMPO            | 0.965801 | 0.060404 | 0.99616  |
| TMPO            | 0.014008 | 0.488663 | 0.144006 |
| STAT1           | 0.084549 | 0.399406 | 0.335025 |
| STAT6           | 0.498977 | 0.129283 | 0.744839 |
| STAT5A          | 0.010997 | 0.422351 | 0.127049 |
| GRIA1           | 0.40269  | 0.170559 | 0.678038 |
| SKIV2L2         | 0.563832 | 0.084454 | 0.789479 |
| AKR1C3          | 0.528679 | -0.45307 | 0.767576 |

|          |          |          |          |
|----------|----------|----------|----------|
| ARHGAP25 | 0.646644 | -0.31426 | 0.837353 |
| PIK3CA   | 0.014853 | 0.859933 | 0.14976  |
| PIK3CB   | 0.478714 | 0.207658 | 0.731324 |
| MTOR     | 0.181644 | 0.175343 | 0.472575 |
| PI4KA    | 0.466082 | 0.128394 | 0.721065 |
| HAL      | 0.149142 | -0.70388 | 0.438811 |
| EPS15    | 0.012538 | 0.291056 | 0.136468 |
| MLLT3    | 0.826366 | 0.098489 | 0.93133  |
| CASP3    | 0.314461 | 0.120628 | 0.612305 |
| CASP2    | 0.009146 | 1.475118 | 0.116274 |
| DPP6     | 0.960709 | 0.151802 | 0.994122 |
| RPS27    | 0.779221 | -0.21146 | 0.906856 |
| ABL2     | 0.064893 | 0.856634 | 0.298022 |
| FRK      | 0.54908  | 0.574137 | 0.781251 |
| HELZ     | 0.02859  | 1.040527 | 0.204681 |
| NCAPD3   | 0.25134  | 0.639096 | 0.555301 |
| RBM34    | 0.095273 | 1.285026 | 0.351755 |
| LIFR     | 0.79579  | -0.00738 | 0.914433 |
| LRPPRC   | 0.272095 | 0.130977 | 0.575039 |
| ACAA2    | 0.478274 | -0.16094 | 0.730754 |
| RPL35    | 0.478274 | 0.253274 | 0.730754 |
| WAS      | 0.861239 | -0.09994 | 0.950165 |
| CDKN2A   | 0.980924 | -0.19776 | 1        |
| CDKN2C   | 0.050503 | 1.480192 | 0.263221 |
| PRCP     | 0.438315 | 0.075855 | 0.701933 |
| CXCL5    | 0.837269 | -0.46552 | 0.937805 |
| HTT      | 0.226131 | 0.24075  | 0.525131 |
| ECE1     | 0.034511 | 0.781221 | 0.222148 |
| MTHFR    | 0.855917 | -0.0438  | 0.946993 |
| SLC1A3   | 0.002999 | 1.839368 | 0.062294 |
| SLC1A2   | 0.889918 | 0.135763 | 0.96614  |
| SLC1A1   | 0.246076 | -0.73458 | 0.549922 |
| SLC1A4   | 0.034501 | 0.583901 | 0.222148 |
| PAFAH1B1 | 0.020421 | 0.280596 | 0.170514 |
| PTGIR    |          | 0        |          |
| MCAM     | 0.009087 | 0.460666 | 0.115713 |
| CRAT     | 0.231232 | -0.21145 | 0.531962 |
| CTSO     | 0.307761 | -0.66821 | 0.609277 |
| CTSK     | 0.000193 | 2.653924 | 0.01029  |
| MATR3    | 0.026002 | 0.316359 | 0.193808 |
| MSH2     | 0.208914 | 0.440975 | 0.503054 |
| GRK6     | 0.781486 | -0.02076 | 0.90873  |
| BTD      | 0.196763 | 0.298432 | 0.490309 |
| GPD2     | 0.301936 | 0.171121 | 0.603275 |
| SSR1     | 0.000151 | 0.568173 | 0.008631 |
| ALDH3B1  | 0.018696 | -0.63625 | 0.165633 |
| MAGEA1   | 0.69426  | 0.128157 | 0.861478 |
| MAGEA4   | 0.041841 | 1.205056 | 0.242066 |
| MAGEA9   | 0.319672 | 0.284478 | 0.613139 |
| MAGEA10  | 0.6137   | 0.288417 | 0.819264 |
| PTPN9    | 0.003514 | 0.897046 | 0.067901 |
| ZAP70    | 0.151534 | 0.661318 | 0.441443 |
| SYK      | 0.003744 | 0.504758 | 0.070138 |
| RANBP1   | 0.627808 | -0.36712 | 0.828932 |
| NAMPT    | 0.14042  | 0.344445 | 0.426568 |
| AFM      | 0.641914 | -0.01085 | 0.835764 |
| LPAR6    |          | 0        |          |
| PSMC4    | 0.197211 | 0.162906 | 0.490309 |

|               |          |          |          |
|---------------|----------|----------|----------|
| GATA4         | 0.079293 | 0.455094 | 0.32578  |
| NKX2-1;NKX2-4 | 0.397911 | -0.3963  | 0.675323 |
| TSFM          | 0.856059 | 0.033476 | 0.946993 |
| ASPA          | 0.116711 | -0.52717 | 0.389656 |
| MMP13         | 0.050063 | 0.960718 | 0.26298  |
| ABCG1         | 0.119052 | 1.038497 | 0.392861 |
| PPIC          | 1.19E-06 | 1.158566 | 0.000169 |
| VDAC2         | 0.434427 | 0.157934 | 0.698194 |
| ACADSB        | 0.013753 | -0.59254 | 0.143228 |
| CBX5          | 0.066208 | 0.335809 | 0.300455 |
| USP5          | 0.02152  | 0.332783 | 0.175496 |
| MAPK8         | 0.185012 | 0.705214 | 0.477255 |
| MAPK9         | 0.374979 | 0.086548 | 0.656862 |
| MAP2K4        | 0.002089 | 0.664815 | 0.048476 |
| MKI67         | 0.044877 | 1.165053 | 0.249738 |
| PHKA2         | 0.774145 | 0.277673 | 0.903913 |
| PHKA1         | 0.617543 | -0.13331 | 0.822194 |
| SLC15A1       | 0.993518 | -0.05813 | 1        |
| RANGAP1       | 0.197211 | 0.161598 | 0.490309 |
| RECQL         | 0.000855 | 0.484179 | 0.027892 |
| NOP2          | 0.05451  | 0.270275 | 0.273313 |
| ATRX          | 0.233812 | 0.440692 | 0.535403 |
| CRK           | 0.226131 | 0.250723 | 0.525131 |
| CRKL          | 0.181644 | 0.184709 | 0.472575 |
| MTIF2         | 0.850885 | 0.087182 | 0.944945 |
| BAG6          | 0.422885 | 0.10184  | 0.691467 |
| GSTM5         | 0.170093 | -0.5605  | 0.461474 |
| NSF           | 0.09193  | 0.240265 | 0.345626 |
| CDKN1B        | 0.773891 | -0.25599 | 0.903913 |
| NOTCH1        | 0.104629 | 0.702828 | 0.368512 |
| MAP2K3        | 0.528742 | 0.269154 | 0.767576 |
| BRCC3         | 0.804634 | 0.101294 | 0.918848 |
| RPL27A        | 0.934288 | 0.013838 | 0.984157 |
| RPL5          | 0.426712 | 0.093625 | 0.693599 |
| RPL21         | 0.887225 | -0.27764 | 0.96416  |
| RPL28         | 0.470127 | -0.14044 | 0.72456  |
| RPS9          | 0.929044 | 0.012937 | 0.983115 |
| RPS5          | 0.604602 | 0.040448 | 0.813002 |
| RPS10         | 0.520146 | -0.003   | 0.760272 |
| MAP1B         | 0.007479 | 1.063321 | 0.10395  |
| GNPDA1        | 0.866426 | 0.076716 | 0.953042 |
| NEDD4         | 0.025998 | 0.571416 | 0.193808 |
| YAP1          | 0.78936  | 0.112358 | 0.911483 |
| UTRN          | 0.955289 | 0.070963 | 0.993074 |
| IQGAP1        | 0.586319 | 0.033821 | 0.801141 |
| HAAO          | 0.894851 | 0.135667 | 0.968678 |
| GYG1          | 0.192667 | -0.2177  | 0.486094 |
| STT3A         | 0.061485 | 0.273976 | 0.289565 |
| RABIF         | 0.041079 | 1.260573 | 0.240826 |
| PLA2G4A       | 0.754042 | 0.095316 | 0.894351 |
| RAP1GAP       | 0.12661  | -0.55706 | 0.403998 |
| CAPZA2        | 0.046008 | 0.166655 | 0.252361 |
| CAPZB         | 0.944783 | 0.003451 | 0.988547 |
| EIF1AX        | 0.411523 | -0.46983 | 0.683152 |
| ALDH1A3       | 0.007769 | 1.043751 | 0.105988 |
| QARS          | 0.581788 | 0.006223 | 0.797998 |
| RPL29         | 0.347246 | -0.37174 | 0.632606 |
| ID4           | 0.045488 | -0.69984 | 0.250872 |

|           |          |          |          |
|-----------|----------|----------|----------|
| LGALS7    | 0.277976 | 1.053304 | 0.579736 |
| ZFP36L2   | 0.020153 | 1.692157 | 0.169843 |
| UQCRFS1   | 0.632496 | -0.08447 | 0.830965 |
| XDH       | 0.907931 | -0.14335 | 0.9734   |
| ATP5O     | 0.897655 | 0.002778 | 0.969793 |
| LIMS1     | 0.0334   | 0.41173  | 0.219585 |
| GLIPR1    | 0.039482 | 1.738016 | 0.23721  |
| CXCL12    | 0.100111 | 1.709398 | 0.359821 |
| SLC6A11   | 0.167805 | 0.751459 | 0.458066 |
| SLC6A9    | 0.224923 | 0.424464 | 0.52386  |
| PREP      | 0.595428 | 0.112802 | 0.806337 |
| ME1       | 0.498972 | -0.06804 | 0.744839 |
| IREB2     | 0.478129 | -0.34549 | 0.730754 |
| TM4SF4    | 0.15526  | 0.210846 | 0.444958 |
| TFPI2     | 0.054366 | 1.315329 | 0.273313 |
| LEPR      | 0.375606 | -0.42696 | 0.657384 |
| RFX2      | 0.135051 | 0.611677 | 0.417833 |
| RFX3      | 0.592958 | 0.292313 | 0.806337 |
| RFX5      | 0.539494 | 0.051246 | 0.775168 |
| PIP4K2A   | 0.018368 | 0.352298 | 0.163766 |
| SOX2      | 0.964156 | 0.101145 | 0.99616  |
| SOX9      | 0.937694 | -0.15679 | 0.986498 |
| ARCN1     | 0.364426 | 0.119202 | 0.646996 |
| LSS       | 0.76912  | 0.047337 | 0.901915 |
| PPP3CC    | 0.015605 | 1.227369 | 0.152856 |
| GCLC      | 0.347246 | 0.60056  | 0.632606 |
| GCLM      | 0.559385 | 0.171389 | 0.78633  |
| CD151     | 0.759058 | -0.11754 | 0.896847 |
| PCP4      | 0.189621 | 0.732372 | 0.482914 |
| KCNJ5     | 0.83432  | -0.03479 | 0.935999 |
| IFNAR2    | 0.923284 | 0.071147 | 0.980751 |
| TRAPPC10  | 0.744041 | 0.160387 | 0.888303 |
| PSMD8     | 0.929044 | -0.01779 | 0.983115 |
| SERPINB4  | 0.055868 | 1.11559  | 0.276127 |
| SERPINB10 | 0.263574 | 0.627343 | 0.565873 |
| PRRC2A    | 0.000484 | 1.172833 | 0.020165 |
| GSS       | 0.609213 | 0.058578 | 0.816529 |
| CCT5      | 0.944783 | 0.006384 | 0.988547 |
| PTDSS1    | 0.327323 | 0.316157 | 0.617719 |
| KRT6C     | 0.013533 | 1.316783 | 0.141885 |
| NES       | 0.856059 | 0.094885 | 0.946993 |
| HSPA13    | 0.006775 | 0.727959 | 0.098484 |
| AMT       | 0.025917 | -1.53254 | 0.193808 |
| CSNK1A1   | 0.577274 | 0.065054 | 0.796634 |
| CSNK1D    | 0.272095 | 0.36286  | 0.575039 |
| IDH2      | 0.734083 | -0.00169 | 0.882858 |
| PIK3CG    | 0.48451  | 0.280095 | 0.735121 |
| PITPNB    | 0.011206 | 0.388023 | 0.128397 |
| MASP1     | 0.677979 | -0.08137 | 0.854776 |
| NOV       | 0.300882 | 0.227641 | 0.602797 |
| CD97      | 0.292764 | 0.205388 | 0.595788 |
| POLD2     | 0.013493 | 1.314377 | 0.141812 |
| MARCKSL1  | 0.164991 | 0.230229 | 0.454525 |
| PXN       | 0.511623 | 0.216692 | 0.754376 |
| CAMLG     | 0.010949 | 0.980889 | 0.127049 |
| NR2C2     | 0.014602 | 1.405299 | 0.147768 |
| MAPKAPK2  | 0.404039 | 0.207131 | 0.678271 |
| DNASE1L1  | 0.037224 | 1.396069 | 0.231548 |



|         |          |          |          |
|---------|----------|----------|----------|
| ALDH9A1 | 0.199513 | -0.16254 | 0.49217  |
| RPL34   | 0.280828 | 0.230739 | 0.583434 |
| RPIA    | 0.112656 | -0.59275 | 0.382523 |
| LMAN1   | 0.014008 | 0.326895 | 0.144006 |
| SLC11A1 | 0.205366 | 0.853799 | 0.49957  |
| SLC11A2 | 0.054603 | 1.279093 | 0.273507 |
| NASP    | 0.44615  | 0.275597 | 0.706795 |
| FMO5    | 0.229576 | -0.92531 | 0.529537 |
| FASN    | 0.704483 | -0.16737 | 0.867291 |
| FNTA    | 0.003666 | 0.485439 | 0.06938  |
| FNTB    | 0.155808 | 1.15262  | 0.446067 |
| DHPS    | 0.426753 | 0.670099 | 0.693599 |
| CCT3    | 0.744041 | 0.000683 | 0.888303 |
| MRPL19  | 0.554955 | 0.100856 | 0.783439 |
| ARRB1   | 0.052873 | -0.31317 | 0.269122 |
| TUFM    | 0.308157 | -0.11226 | 0.609277 |
| AMPH    | 0.622203 | 0.122944 | 0.825978 |
| ALDH7A1 | 0.520146 | -0.09228 | 0.760272 |
| CDC34   | 0.00094  | 2.300321 | 0.02929  |
| INPP1   | 0.822544 | -0.10482 | 0.92929  |
| CYB561  | 0.40574  | -0.76711 | 0.679973 |
| GLUD2   | 0.61986  | -0.33033 | 0.823535 |
| CENPF   | 0.000906 | 1.889948 | 0.028881 |
| SRP9    | 0.97106  | -0.15447 | 0.997592 |
| UBE2A   | 0.077557 | 1.349495 | 0.324641 |
| PCYT1A  | 0.003823 | 0.398037 | 0.070612 |
| AARS    | 0.058787 | 0.326863 | 0.283235 |
| CARS    | 0.03232  | 0.354966 | 0.215938 |
| HARS2   | 0.892438 | -0.05985 | 0.966699 |
| SARS    | 0.133456 | 0.178535 | 0.416228 |
| PPM1F   | 0.35064  | 0.169288 | 0.635657 |
| DGKG    | 0.556057 | 0.150574 | 0.783439 |
| TPPA    | 0.632486 | -0.23533 | 0.830965 |
| MAN2A2  | 0.15309  | 0.193351 | 0.443165 |
| PRIM1   | 0.757912 | 0.096226 | 0.896847 |
| PRIM2   | 0.86596  | 0.038614 | 0.953042 |
| CASP4   | 0.382127 | 0.474516 | 0.661698 |
| CSNK1E  | 0.712043 | 0.136525 | 0.870223 |
| CTCF    | 0.939534 | -0.04695 | 0.986498 |
| CEBPD   | 0.751226 | 0.266942 | 0.892921 |
| PSMB3   | 0.269226 | 0.194941 | 0.571371 |
| PSMB2   | 0.396661 | 0.155227 | 0.67382  |
| MCM2    | 0.010996 | 1.447352 | 0.127049 |
| THBS3   | 8.52E-08 | 3.887793 | 2.20E-05 |
| COMP    | 0.000106 | 2.617048 | 0.006612 |
| ACADVL  | 0.600007 | 0.076294 | 0.810262 |
| YLPM1   | 0.396661 | 0.204661 | 0.67382  |
| ACOT2   | 0.147392 | 0.999039 | 0.436386 |
| VPS41   | 0.039909 | 0.56643  | 0.23845  |
| TMED10  | 0.228671 | 0.263865 | 0.528484 |
| RBM25   | 0.407778 | 0.200747 | 0.680612 |
| NUMB    | 0.835403 | -0.09607 | 0.935999 |
| CLK1    | 0.120471 | 0.631937 | 0.39531  |
| CLK2    | 0.192782 | 0.720244 | 0.486274 |
| CLK3    | 0.296535 | -0.62252 | 0.599275 |
| PGF     | 0.079293 | 0.396626 | 0.32578  |
| VEGFB   | 0.805837 | 0.056982 | 0.919879 |
| VEGFC   | 0.375847 | 0.245529 | 0.657392 |

|          |          |          |          |
|----------|----------|----------|----------|
| PSEN1    | 0.648867 | 0.163281 | 0.839222 |
| EIF2B2   | 0.153276 | 0.257471 | 0.443165 |
| HINT1    | 0.474191 | -0.11635 | 0.727018 |
| RARRES1  | 0.499616 | -0.17077 | 0.745391 |
| FHIT     | 0.597706 | 0.064807 | 0.808505 |
| NUP153   | 0.38573  | 0.23576  | 0.664306 |
| RANBP2   | 0.069183 | 0.235818 | 0.306571 |
| RGS19    | 0.003769 | 1.36776  | 0.07038  |
| RGS3     | 0.280957 | 0.43781  | 0.583538 |
| PSEN2    | 0.138998 | 0.792701 | 0.4248   |
| TSC2     | 0.003904 | 0.684189 | 0.071121 |
| NDUFV1   | 0.944783 | -0.00933 | 0.988547 |
| GSK3A    | 0.079897 | 0.788792 | 0.325919 |
| GSK3B    | 0.00841  | 0.579474 | 0.110127 |
| STK19    | 0.962053 | 0.057702 | 0.99507  |
| TAF6     | 0.164991 | 0.590584 | 0.454525 |
| KLK7     | 0.988991 | 0.011587 | 1        |
| GZMK     | 0.249041 | -1.05923 | 0.552533 |
| SULT1E1  | 0.068539 | 0.880817 | 0.305289 |
| NT5C2    | 0.000207 | 0.647497 | 0.010881 |
| SEPHS1   | 0.709387 | 0.149271 | 0.869179 |
| SEPP1    | 0.631631 | -0.25364 | 0.830965 |
| CAMP     | 0.683724 | 0.465326 | 0.85709  |
| MTHFS    | 0.400274 | 0.224847 | 0.67622  |
| GMPS     | 0.164991 | 0.265169 | 0.454525 |
| LIG3     | 0.997369 | 0.091068 | 1        |
| LIG4     | 0.063602 | 0.829842 | 0.294903 |
| MRE11A   | 0.033952 | 0.323306 | 0.221141 |
| ENTPD1   | 0.002233 | 0.703413 | 0.050657 |
| HNMT     | 0.665709 | -0.22552 | 0.847351 |
| GNAQ     | 0.494799 | 0.048654 | 0.741997 |
| GNG4     | 0.067799 | 1.26767  | 0.303698 |
| GNG10    | 0.118765 | 0.55296  | 0.392409 |
| IDH3A    | 0.45805  | -0.10624 | 0.715224 |
| MEOX1    | 0.881175 | -0.19899 | 0.961515 |
| SULT1A1  | 0.016204 | -0.59778 | 0.154611 |
| SULT1A2  | 0.070956 | -1.09899 | 0.311134 |
| CRIP1    | 0.819984 | -0.02264 | 0.92687  |
| MMP14    | 2.53E-09 | 1.996101 | 2.00E-06 |
| PPOX     | 0.784286 | 0.031492 | 0.909506 |
| GDI2     | 0.197211 | 0.216515 | 0.490309 |
| EMD      | 0.913333 | -0.02365 | 0.975706 |
| CPT1A    | 0.068179 | 0.370396 | 0.303928 |
| GATM     | 0.301936 | 0.566528 | 0.603275 |
| SLC26A2  | 0.005049 | 1.574635 | 0.083219 |
| SERPINB8 | 0.578778 | 0.325077 | 0.796675 |
| SERPINB9 | 0.206534 | 0.265312 | 0.500256 |
| SERPINH1 | 3.73E-07 | 0.787721 | 6.96E-05 |
| CSRP3    | 0.129735 | 1.145118 | 0.410641 |
| PDLIM4   | 1.55E-09 | 2.548929 | 1.33E-06 |
| ST13     | 0.586319 | 0.143737 | 0.801141 |
| PEX5     | 0.032854 | 0.487169 | 0.217297 |
| ERF      | 0.057217 | 1.068183 | 0.279188 |
| VASP     | 0.052873 | 0.177467 | 0.269122 |
| DNM2     | 0.72417  | 0.009738 | 0.876654 |
| METAP2   | 0.779221 | 0.019414 | 0.906856 |
| NUDT2    | 0.204149 | 0.491313 | 0.497963 |
| TNFSF10  | 0.602579 | 0.130978 | 0.8126   |

|         |          |          |          |
|---------|----------|----------|----------|
| CDK7    | 0.129313 | 0.952875 | 0.40989  |
| HLCS    | 0.411372 | 0.503619 | 0.683152 |
| KNTC1   | 0.264682 | 0.26835  | 0.567373 |
| RASSF2  | 0.001054 | 1.329857 | 0.031507 |
| CDK9    | 0.023466 | 0.402641 | 0.184845 |
| LRBA    | 0.009264 | -0.54192 | 0.116462 |
| BCAM    | 0.007932 | -0.69141 | 0.107292 |
| PPT1    | 0.007779 | 0.401804 | 0.105988 |
| RPL14   | 0.794443 | -0.10906 | 0.913708 |
| CCT8    | 0.568296 | -0.05793 | 0.791838 |
| CCT4    | 0.892438 | -0.02119 | 0.966699 |
| ATP1A2  | 0.13996  | -0.52452 | 0.426568 |
| ANXA11  | 0.934288 | -0.00361 | 0.984157 |
| PAPOLA  | 0.040551 | 0.625046 | 0.240216 |
| FXR1    | 0.000122 | 0.537149 | 0.007389 |
| FXR2    | 0.020065 | 0.410744 | 0.169555 |
| GZMM    | 0.606932 | -0.25656 | 0.815541 |
| RAB5C   | 0.002045 | 0.305167 | 0.047942 |
| RAB7A   | 0.422885 | 0.108364 | 0.691467 |
| RAB9A   | 0.997369 | 0.008294 | 1        |
| RAB13   | 0.147661 | 0.336682 | 0.436386 |
| RAB28   | 0.153854 | 0.708248 | 0.444477 |
| RAB27A  | 0.012538 | -0.49032 | 0.136468 |
| FABP6   | 0.547409 | -0.54398 | 0.779573 |
| SCNN1B  | 0.799868 | 0.030332 | 0.916176 |
| SCNN1G  | 1        | -0.09521 | 1        |
| PLCD1   | 0.223612 | 0.397478 | 0.521792 |
| DAP     | 0.796968 | 0.191968 | 0.915123 |
| DAP3    | 0.010194 | 0.393324 | 0.121876 |
| DUSP3   | 0.056188 | 0.371253 | 0.276683 |
| MMP15   | 0.4088   | 0.536602 | 0.681762 |
| NOVA1   | 0.300882 | 0.230851 | 0.602797 |
| SMARCA2 | 0.175259 | 0.246303 | 0.466796 |
| SMARCA4 | 0.343873 | 0.216977 | 0.630156 |
| IDH3G   | 0.32085  | -0.15927 | 0.613139 |
| GALK1   | 0.123514 | 0.182611 | 0.399387 |
| SSR4    | 0.001562 | 0.482377 | 0.040678 |
| BCAP31  | 0.656149 | -0.07531 | 0.84209  |
| P2RX1   | 0.423285 | 0.367693 | 0.691917 |
| TPMT    | 0.563831 | -0.03884 | 0.789479 |
| CYP2J2  | 0.346723 | 0.340237 | 0.632606 |
| RENBP   | 0.515871 | 0.066344 | 0.757825 |
| MECP2   | 0.537409 | -0.03656 | 0.773175 |
| HCFC1   | 0.197211 | 0.153132 | 0.490309 |
| IRAK1   | 0.063192 | 1.417752 | 0.294055 |
| CAV2    | 0.30811  | -0.80567 | 0.609277 |
| ALDH3A2 | 0.656149 | -0.1084  | 0.84209  |
| ALDH5A1 | 0.010997 | -0.53631 | 0.127049 |
| GPC3    | 0.88748  | 0.22426  | 0.964342 |
| HSD17B4 | 0.442223 | -0.18523 | 0.703704 |
| PSMD7   | 0.031791 | 0.275763 | 0.214212 |
| UBE2D1  | 0.18937  | -1.76062 | 0.482385 |
| GPM6A   | 0.211643 | -0.72324 | 0.507094 |
| CCR5    | 0.171491 | 0.524581 | 0.462438 |
| CCR6    | 0.845382 | 0.046815 | 0.942239 |
| SUOX    | 0.398393 | -0.43032 | 0.675933 |
| SGSH    | 0.526725 | -0.82342 | 0.766252 |
| ARSD    | 0.882017 | 0.112751 | 0.961515 |

|                        |          |          |          |
|------------------------|----------|----------|----------|
| ARSE                   | 0.709651 | 0.724309 | 0.869407 |
| STAT5B                 | 0.026884 | 0.773385 | 0.198225 |
| USP11                  | 0.000186 | 1.380745 | 0.010031 |
| KCNQ1                  | 0.787673 | 0.013325 | 0.911483 |
| CLCN3                  | 0.136595 | 0.320669 | 0.421413 |
| CLCN4                  | 0.571349 | 0.036687 | 0.793891 |
| CLCN5                  | 0.720143 | 0.219683 | 0.875395 |
| CLCN6                  | 0.504624 | -0.38204 | 0.749235 |
| CLCN7                  | 0.204174 | 0.076542 | 0.497963 |
| PLXNA3                 | 0.23546  | 0.261248 | 0.537676 |
| DYNLT3                 | 0.12513  | 0.078043 | 0.401334 |
| VAMP7                  | 0.537409 | 0.22773  | 0.773175 |
| XK                     | 0.319672 | 0.196536 | 0.613139 |
| RPS6KA3                | 0.559385 | -0.04852 | 0.78633  |
| BMX                    | 0.971656 | -0.17752 | 0.997592 |
| ZNF75D                 | 0.291769 | 0.34106  | 0.595183 |
| AFF1                   | 0.015658 | 1.147413 | 0.153007 |
| ADCY7                  | 0.36297  | 0.409592 | 0.646802 |
| NR0B1                  | 0.22359  | 0.442012 | 0.521792 |
| TKTL1                  | 0.163587 | 0.714867 | 0.453012 |
| AKR1D1                 | 0.759464 | -0.04037 | 0.896997 |
| HDGF                   | 0.581788 | 0.138489 | 0.797998 |
| LUM                    | 0.009264 | 0.464995 | 0.116462 |
| PRELP                  | 0.269226 | 0.188143 | 0.571371 |
| CNN1                   | 0.001187 | 0.898634 | 0.03367  |
| CCNH                   | 0.261927 | 0.21138  | 0.565402 |
| MNAT1                  | 0.076212 | 1.044724 | 0.322007 |
| NEK3                   | 0.266479 | 0.083584 | 0.568807 |
| NEK4                   | 0.976387 | -0.07491 | 0.998921 |
| UBE2E1                 | 0.286448 | 0.727607 | 0.590053 |
| NDUFA8                 | 0.929044 | 0.018123 | 0.983115 |
| HNRNPA3                | 0.739057 | -0.03011 | 0.886253 |
| PGD                    | 0.609213 | -0.10215 | 0.816529 |
| HNRNPM                 | 0.021897 | 0.337762 | 0.176756 |
| KPNA2                  | 0.001597 | 1.482757 | 0.041198 |
| KPNA1                  | 0.554954 | -0.15454 | 0.783439 |
| NCBP2                  | 0.274505 | 0.279305 | 0.577625 |
| RAP1GDS1               | 0.094502 | 0.430201 | 0.349959 |
| JAK3                   | 0.00503  | 1.068096 | 0.083138 |
| DGKE                   | 0.005865 | -1.26694 | 0.08985  |
| POLR2H                 | 0.520146 | 0.314567 | 0.760272 |
| POLR2J;POLR2J3;POLR2J2 | 0.577253 | -0.03866 | 0.796634 |
| MAP2K6                 | 0.040321 | 1.404842 | 0.240173 |
| ARHGDIA                | 0.133456 | 0.305502 | 0.416228 |
| ARHGDIB                | 0.67051  | -0.15487 | 0.850681 |
| SLC7A2                 | 0.173783 | 0.530927 | 0.46573  |
| AGFG1                  | 0.434427 | 0.121799 | 0.698194 |
| HNRNPF                 | 0.378546 | 0.068573 | 0.659304 |
| STAT2                  | 0.000444 | 0.64498  | 0.019015 |
| GTF2A1                 | 0.289266 | 0.451862 | 0.593134 |
| GTF2A2                 | 0.100012 | -1.30026 | 0.359674 |
| MSH6                   | 0.028293 | 0.722109 | 0.203235 |
| KIF11                  | 0.292977 | 0.589889 | 0.595821 |
| VAV2                   | 0.689846 | -0.083   | 0.859429 |
| ZNF131                 | 0.19172  | 0.574551 | 0.485915 |
| ZNF143                 | 0.008427 | 1.154025 | 0.11022  |
| RBM5                   | 0.500879 | 0.134353 | 0.746473 |
| CHN2                   | 0.274206 | 0.50964  | 0.577625 |

|         |          |          |          |
|---------|----------|----------|----------|
| HRSP12  | 0.902819 | 0.34051  | 0.971583 |
| SMS     | 0.515876 | -0.09212 | 0.757825 |
| HK2     | 0.684992 | -0.05785 | 0.85709  |
| HK3     | 0.371444 | 0.180295 | 0.65423  |
| EFNB2   | 0.707926 | 0.222237 | 0.869179 |
| EFNA5   | 0.310183 | 0.240818 | 0.609864 |
| MRPL12  | 0.404052 | 0.231798 | 0.678271 |
| STC1    | 0.702511 | 0.166148 | 0.866226 |
| DGKQ    | 0.144874 | 0.76017  | 0.43345  |
| NDST1   | 0.642886 | 0.275731 | 0.836333 |
| NDST2   | 0.542046 | 0.078049 | 0.775521 |
| THOP1   | 0.049723 | 0.472851 | 0.261364 |
| AKR1C2  | 0.348549 | 1.064576 | 0.634355 |
| CAPZA1  | 0.02267  | 0.266103 | 0.180886 |
| HMGA2   | 0.009668 | 2.780277 | 0.119174 |
| CRIP2   | 0.54177  | 0.191227 | 0.775521 |
| NUP98   | 0.360948 | 0.141867 | 0.644411 |
| BLVRA   | 0.159052 | -0.26305 | 0.449897 |
| SLC25A1 | 0.559385 | 0.106359 | 0.78633  |
| PPP5C   | 0.052873 | 0.137263 | 0.269122 |
| PLK1    | 0.842222 | 0.060791 | 0.940547 |
| DAPK1   | 0.353314 | 0.645233 | 0.638094 |
| ARFIP2  | 0.552736 | -0.35959 | 0.783393 |
| ARFIP1  | 0.794443 | -0.06314 | 0.913708 |
| NUDT6   | 0.485692 | -0.38116 | 0.736106 |
| NUBP1   | 0.627809 | -0.07852 | 0.828932 |
| ACLY    | 0.061485 | 0.231027 | 0.289565 |
| COL4A4  | 0.4794   | -0.53408 | 0.731833 |
| FOSB    | 0.192496 | 0.472286 | 0.486094 |
| CEBPG   | 0.476091 | 0.466736 | 0.728924 |
| METAP1  | 0.537409 | -0.14446 | 0.773175 |
| SUCLG1  | 0.231232 | -0.17045 | 0.531962 |
| MVD     | 0.861238 | 0.528584 | 0.950165 |
| PGGT1B  | 0.483618 | 0.695725 | 0.734969 |
| RABGGTB | 0.913328 | -0.01063 | 0.975706 |
| COPB1   | 0.067188 | 0.203111 | 0.302058 |
| COPA    | 0.008089 | 0.235868 | 0.107782 |
| CTSC    | 0.76912  | -0.07224 | 0.901915 |
| LIMK1   | 0.083234 | 0.776221 | 0.332962 |
| LIMK2   | 0.048642 | 1.358749 | 0.259247 |
| CLTCL1  | 0.914896 | 0.00966  | 0.976905 |
| AP3M2   | 0.000688 | 1.624435 | 0.024536 |
| AP2S1   | 0.05791  | 0.360553 | 0.280499 |
| HCCS    | 0.76912  | 0.277759 | 0.901915 |
| ITGA8   | 0.236483 | -0.74827 | 0.537906 |
| MAPK12  | 0.107487 | 0.758371 | 0.372977 |
| SLC5A3  | 0.322817 | 0.617549 | 0.613707 |
| PTTG1IP | 0.114105 | 0.608561 | 0.385201 |
| POLR2K  | 0.969947 | 0.818079 | 0.997592 |
| SMTN    | 0.038017 | 1.280121 | 0.233324 |
| PLA2G16 | 0.166175 | 0.869496 | 0.457139 |
| SLC16A1 | 0.015582 | 1.433906 | 0.152856 |
| IST1    | 0.162993 | 0.249071 | 0.453012 |
| SEC24C  | 0.00719  | 0.256061 | 0.101457 |
| SUB1    | 0.887225 | -0.00907 | 0.96416  |
| POLG    | 0.627465 | -0.03397 | 0.828932 |
| CLNS1A  | 0.295317 | 0.757852 | 0.598344 |
| CRISP3  | 0.953103 | 0.024966 | 0.993074 |

|          |          |          |          |
|----------|----------|----------|----------|
| BLM      | 0.339777 | 0.604084 | 0.627033 |
| RARS     | 0.939534 | 0.003351 | 0.986498 |
| HIRA     | 0.418668 | 0.118841 | 0.688796 |
| ATXN3    | 0.238822 | 0.549602 | 0.541047 |
| ATXN1    | 4.32E-06 | 3.141828 | 0.000494 |
| ATN1     | 0.00881  | 1.096612 | 0.11325  |
| TERF1    | 0.96026  | -0.19251 | 0.994122 |
| PMS1     | 0.147023 | 0.347329 | 0.436347 |
| PMS2     | 0.550674 | 0.143737 | 0.781335 |
| CACNA2D1 | 0.241676 | 0.399298 | 0.544139 |
| YARS     | 0.965801 | -0.03077 | 0.99616  |
| USP14    | 0.32085  | 0.15726  | 0.613139 |
| PRKAG1   | 0.26355  | 0.239881 | 0.565873 |
| PRKAA2   | 0.772447 | 0.234062 | 0.903913 |
| HSPA2    | 0.301936 | 0.420993 | 0.603275 |
| BCAT1    | 0.043861 | 0.731838 | 0.247494 |
| ATP12A   | 0.222633 | -1.15181 | 0.521263 |
| ATP1B3   | 0.03232  | 0.419489 | 0.215938 |
| RAD23A   | 0.54177  | -0.14483 | 0.775521 |
| RAD23B   | 0.208914 | 0.12677  | 0.503054 |
| EPHB3    | 0.005771 | 1.197264 | 0.089283 |
| EPHB4    | 0.796831 | -0.06889 | 0.915123 |
| EPHA4    | 0.481971 | 0.409218 | 0.733586 |
| NAGLU    | 0.38573  | 0.156472 | 0.664306 |
| GALC     | 0.781746 | -0.41067 | 0.908746 |
| AK2      | 0.2958   | -0.22175 | 0.598344 |
| PRRX1    | 2.68E-08 | 3.91522  | 8.36E-06 |
| GAS1     | 1        | -0.02722 | 1        |
| GYS2     | 0.411887 | 0.206559 | 0.683152 |
| EMP3     | 0.005372 | 1.394139 | 0.086604 |
| UGT2B15  | 0.736368 | -0.20936 | 0.884985 |
| HMGCS2   | 0.11387  | -0.86399 | 0.385201 |
| ALDH18A1 | 0.213733 | 0.270164 | 0.509228 |
| NAPA     | 0.689846 | 0.012621 | 0.859429 |
| ADPRH    | 0.015909 | 0.670595 | 0.153751 |
| SLURP1   | 0.331588 | -0.19317 | 0.619341 |
| MFAP2    | 0.039276 | 0.487243 | 0.236232 |
| AIF1     | 0.520146 | 0.094119 | 0.760272 |
| EIF5     | 0.037428 | 0.289312 | 0.231646 |
| SLC12A2  | 0.35064  | 0.521113 | 0.635657 |
| PSMD4    | 0.595428 | 0.111869 | 0.806337 |
| DRG2     | 0.850885 | -0.15164 | 0.944945 |
| GEM      | 0.872446 | -0.16385 | 0.956723 |
| RRAD     | 0.560457 | -0.22556 | 0.787589 |
| NR1H2    | 0.064027 | 1.117956 | 0.296208 |
| APOC4    | 0.091968 | 1.255598 | 0.345653 |
| PLTP     | 0.083358 | 0.984334 | 0.332962 |
| CSE1L    | 0.064284 | 0.283058 | 0.296208 |
| TMBIM6   | 0.002419 | 1.570053 | 0.053552 |
| VCP      | 0.274985 | 0.079764 | 0.577625 |
| MFAP1    | 0.786816 | 0.369762 | 0.911452 |
| MFAP3    | 0.65015  | 0.138641 | 0.839222 |
| MFAP4    | 0.419073 | 0.208333 | 0.688796 |
| HADHB    | 0.149515 | -0.16862 | 0.438811 |
| AQP4     | 0.009012 | -2.77505 | 0.115288 |
| INHBC    | 0.868337 | -0.0335  | 0.954766 |
| GDF10    | 0.446588 | -0.67815 | 0.707261 |
| MANF     | 0.563832 | 0.079259 | 0.789479 |

|         |          |          |          |
|---------|----------|----------|----------|
| MTTP    | 0.932488 | -0.18174 | 0.984157 |
| NCKAP1L | 0.32085  | 0.137136 | 0.613139 |
| MLLT4   | 0.236413 | -0.23212 | 0.537858 |
| MLLT6   | 0.647413 | -0.30026 | 0.83786  |
| ELL     | 0.172232 | 0.699444 | 0.463535 |
| BRPF1   | 0.626168 | -0.24825 | 0.828579 |
| NAP1L1  | 0.033952 | 0.290487 | 0.221141 |
| CASP7   | 0.689843 | 0.024164 | 0.859429 |
| CASP9   | 0.041387 | 1.54744  | 0.240826 |
| CASP6   | 0.997369 | -0.07153 | 1        |
| GP2     | 0.664325 | 0.011648 | 0.847289 |
| ADK     | 0.960544 | 0.033827 | 0.994122 |
| ADAR    | 0.048208 | 0.311852 | 0.257798 |
| LAMB2   | 0.050495 | -0.65886 | 0.263221 |
| CDKN2D  | 0.960709 | 0.175128 | 0.994122 |
| CDH6    | 0.163211 | -0.78212 | 0.453012 |
| CDH11   | 6.33E-06 | 1.06514  | 0.000675 |
| CDH13   | 0.12513  | 0.353113 | 0.401334 |
| FOXA1   | 0.151388 | 1.388897 | 0.44125  |
| TPD52   | 0.533067 | -0.1489  | 0.7709   |
| PRMT2   | 0.996791 | 0.025345 | 1        |
| PKNOX1  | 0.008095 | 1.879309 | 0.107782 |
| SEC13   | 0.199513 | 0.146587 | 0.49217  |
| NHP2L1  | 0.61848  | 0.040578 | 0.822194 |
| PAX9    | 0.405729 | 0.5123   | 0.679973 |
| CCL18   | 0.475884 | 0.458329 | 0.728908 |
| NPEPPS  | 0.343873 | 0.131921 | 0.630156 |
| GFER    | 0.716758 | 0.181659 | 0.873394 |
| HNRNPH2 | 0.374984 | 0.065697 | 0.656862 |
| OXCT1   | 0.06524  | 0.492796 | 0.298136 |
| SUMO3   | 0.985711 | 0.134142 | 1        |
| EIF3B   | 0.047465 | 0.206069 | 0.255923 |
| FCGRT   | 0.286754 | 0.209524 | 0.590053 |
| BID     | 0.027122 | 0.90373  | 0.199082 |
| ATP5J2  | 0.43056  | 0.166977 | 0.695651 |
| GFRA1   | 0.210617 | -0.43628 | 0.506604 |
| NDUFV3  | 0.802262 | 0.392558 | 0.91835  |
| RRP1    | 0.354009 | -0.48435 | 0.638094 |
| MARS    | 0.292764 | 0.163665 | 0.595788 |
| ITGA1   | 0.799534 | -0.12243 | 0.916173 |
| CTSW    | 0.954108 | 0.083927 | 0.993074 |
| ARPP19  | 0.997359 | 0.029904 | 1        |
| MAZ     | 0.640497 | -0.23305 | 0.835736 |
| CMC4    | 0.481393 | -0.59888 | 0.733586 |
| MTCP1   | 0.163438 | -0.20557 | 0.453012 |
| TCL1A   | 0.753221 | 0.142809 | 0.894143 |
| POLE2   | 0.675707 | 0.217181 | 0.85327  |
| AP1S2   | 0.513557 | 0.201031 | 0.75602  |
| ATP5I   | 0.699592 | 0.218026 | 0.864146 |
| LGALS4  | 0.384279 | -1.04035 | 0.66413  |
| HDAC4   | 0.188175 | 1.157233 | 0.480067 |
| EIF6    | 0.055344 | 0.251176 | 0.274516 |
| CAV3    | 0.024484 | -0.68695 | 0.189451 |
| CTBP2   | 0.055344 | 0.302861 | 0.274516 |
| NDUFA6  | 0.581788 | -0.07796 | 0.797998 |
| TMEM50B | 0.97632  | 0.054563 | 0.998921 |
| ARL4C   | 0.001796 | 1.709253 | 0.044352 |
| PEX3    | 0.20772  | 0.35336  | 0.502361 |

|           |          |          |          |
|-----------|----------|----------|----------|
| NME5      | 0.688686 | -0.17831 | 0.859429 |
| WNT3      | 0.188151 | -0.49543 | 0.480067 |
| WNT4      | 0.739224 | -0.26758 | 0.886253 |
| WNT7B     | 0.37661  | -0.35532 | 0.658208 |
| PRSS12    | 0.993518 | 0.017115 | 1        |
| CLDN6     | 0.132741 | 0.916693 | 0.415416 |
| CLDN12    | 0.857343 | -0.23036 | 0.948129 |
| CLDN18    | 0.253801 | -1.01045 | 0.557407 |
| HSD17B7   | 0.960544 | 0.194972 | 0.994122 |
| BCAR1     | 0.243003 | 0.434017 | 0.546608 |
| STX17     | 0.342181 | 0.01162  | 0.629606 |
| SLC37A1   | 0.17188  | 0.590868 | 0.463149 |
| RWDD2B    | 0.367073 | -0.29014 | 0.649965 |
| UBASH3A   | 0.235307 | 0.270365 | 0.537436 |
| C21orf59  | 0.079693 | 1.002375 | 0.325919 |
| RIPK4     | 0.852223 | 0.201945 | 0.945958 |
| WDR4      | 0.039072 | 1.29632  | 0.236232 |
| TBX4      | 0.269746 | -0.22313 | 0.572146 |
| JAM2      | 0.358069 | -0.39921 | 0.642301 |
| TMEM33    | 0.861239 | 0.01083  | 0.950165 |
| SYNJ2BP   | 0.759058 | -0.04272 | 0.896847 |
| GEMIN4    | 0.130825 | 0.615279 | 0.412798 |
| PCBP3     | 0.934273 | -0.6929  | 0.984157 |
| PCBP4     | 0.986393 | -0.07302 | 1        |
| RAB38     | 0.287701 | -0.63404 | 0.591234 |
| RAB25     | 0.382122 | -0.62502 | 0.661698 |
| CORO7     | 0.004905 | 0.44577  | 0.082133 |
| TCTA      | 0.331588 | -0.17501 | 0.619341 |
| CLDN2     | 0.207643 | 0.792725 | 0.502361 |
| NUP107    | 0.05791  | 0.274277 | 0.280499 |
| GSDMD     | 0.190424 | 0.243159 | 0.483515 |
| SNX16     | 0.126059 | -1.12457 | 0.403148 |
| EEFSEC    | 0.694713 | 0.109571 | 0.861478 |
| FBXW4     | 0.105925 | -0.37871 | 0.370605 |
| SESN2     | 0.91984  | 0.086203 | 0.97992  |
| SESN3     | 0.543052 | 0.376001 | 0.776459 |
| EPPK1     | 0.830256 | -0.15329 | 0.933615 |
| INHBE     | 0.596678 | 0.318019 | 0.807535 |
| LOXL3     | 0.213674 | 0.542405 | 0.509228 |
| ZNF121    | 0.013334 | 1.07165  | 0.141381 |
| ANTXR2    | 0.117158 | 0.761668 | 0.389929 |
| MLF1      | 0.202197 | 0.525115 | 0.495704 |
| ADAMTS12  | 2.71E-08 | 2.904706 | 8.36E-06 |
| FAM3B     | 0.946549 | -0.02625 | 0.989647 |
| SMIM11    | 0.397548 | 0.483767 | 0.675017 |
| MTPN      | 0.871617 | -0.18559 | 0.956098 |
| YBEY      | 0.083995 | 1.214214 | 0.334503 |
| EVA1C     | 0.346041 | -0.42728 | 0.632606 |
| TIRAP     | 0.15526  | 0.223378 | 0.444958 |
| HIST1H2BD | 0.375606 | -0.55686 | 0.657384 |
| RAB15     | 0.030181 | 1.516949 | 0.209418 |
| DEFA3     | 0.280828 | -0.72707 | 0.583434 |
| GNG2      | 0.887225 | -0.27307 | 0.96416  |
| AP3S2     | 0.276129 | -0.69381 | 0.579478 |
| DNAJB13   | 0.518766 | 0.295883 | 0.760272 |
| ARPC4     | 0.142204 | 0.133091 | 0.428816 |
| ELOF1     | 0.188642 | 0.81576  | 0.480971 |
| DEFB1     | 0.563678 | -0.20924 | 0.789479 |



|           |          |          |          |
|-----------|----------|----------|----------|
| CD81      | 0.76912  | 0.108411 | 0.901915 |
| SEC61G    | 0.009444 | 0.446452 | 0.117552 |
| TPI1      | 0.272095 | 0.171689 | 0.575039 |
| PLP1      | 0.57907  | -0.10245 | 0.796675 |
| EIF3E     | 0.419078 | 0.027508 | 0.688796 |
| SEC61B    | 0.45805  | 0.21704  | 0.715224 |
| PTEN      | 0.512959 | 0.390273 | 0.755743 |
| PPP4C     | 0.133456 | 0.238704 | 0.416228 |
| GABARAPL2 | 0.132239 | 0.827623 | 0.414428 |
| ROMO1     | 0.138652 | 0.759868 | 0.424105 |
| UBE2G2    | 0.066208 | 0.495793 | 0.300455 |
| MYL6      | 8.33E-05 | 0.44706  | 0.005438 |
| ACTB      | 0.001634 | 0.21248  | 0.041715 |
| RAC3      | 0.964227 | 0.041281 | 0.99616  |
| EIF4A1    | 0.030755 | 0.319383 | 0.211475 |
| RPS20     | 0.660922 | -0.09263 | 0.844596 |
| SNAP25    | 0.300882 | 0.230812 | 0.602797 |
| PRPS1     | 0.581788 | -0.11955 | 0.797998 |
| PSMA6     | 0.784286 | 0.081503 | 0.909506 |
| S100A10   | 0.641914 | -0.15327 | 0.835764 |
| CDC42     | 0.835403 | 0.002637 | 0.935999 |
| DSTN      | 0.784286 | -0.02172 | 0.909506 |
| GMFB      | 0.825116 | 0.008033 | 0.930395 |
| RAB8A     | 0.61848  | 0.132245 | 0.822194 |
| SPCS3     | 0.090665 | 0.320379 | 0.343901 |
| SRP54     | 0.871617 | -0.01278 | 0.956098 |
| RAB4B     | 0.389353 | -0.09898 | 0.667643 |
| RAB2A     | 0.819984 | 0.002444 | 0.92687  |
| RAB5B     | 0.503174 | 0.010466 | 0.747596 |
| CKS1B     | 0.325226 | 0.63783  | 0.615753 |
| RAB10     | 0.114161 | 0.340789 | 0.385201 |
| CXCR4     | 0.827576 | -0.08202 | 0.932505 |
| UBE2D3    | 0.675324 | 0.266039 | 0.853175 |
| UBE2M     | 0.064284 | 0.292154 | 0.296208 |
| UBE2K     | 0.167008 | 0.421287 | 0.457139 |
| UBE2N     | 0.411524 | 0.081586 | 0.683152 |
| RAB14     | 0.094502 | 0.127742 | 0.349959 |
| ZC3H6     | 0.598967 | 0.500091 | 0.809942 |
| ACTR3     | 0.010002 | 0.233053 | 0.120967 |
| ACTR2     | 0.005656 | 0.290973 | 0.088608 |
| ACTR1A    | 0.223612 | 0.133571 | 0.521792 |
| TMEM258   | 0.327323 | 0.22122  | 0.617719 |
| COPS2     | 0.997369 | 0.04541  | 1        |
| ABCE1     | 9.56E-05 | 0.467009 | 0.006126 |
| RAP1B     | 0.694713 | 0.054116 | 0.861478 |
| RAP2B     | 0.039909 | 0.278515 | 0.23845  |
| MAX       | 0.789154 | -0.29046 | 0.911483 |
| RPS3A     | 0.739057 | -0.07936 | 0.886253 |
| RPL26     | 0.169043 | -0.47131 | 0.459676 |
| STX1B     | 0.300882 | 0.283482 | 0.602797 |
| PSME3     | 0.015629 | 0.418586 | 0.152856 |
| RPL15     | 0.367925 | 0.121253 | 0.650718 |
| MAGOH     | 0.074384 | 0.257715 | 0.317894 |
| RPL27     | 0.646644 | 0.058686 | 0.837353 |
| ATP6V0D1  | 0.799534 | -0.03601 | 0.916173 |
| PCBD1     | 0.382127 | -0.07357 | 0.661698 |
| RPL37A    | 0.280828 | 0.047864 | 0.583434 |
| RHOA      | 0.102567 | 0.155982 | 0.364372 |

|                |          |          |          |
|----------------|----------|----------|----------|
| RND3           | 0.140925 | 0.719851 | 0.42775  |
| NAA20          | 0.033706 | 1.191417 | 0.221141 |
| NCALD          | 0.915947 | -0.30518 | 0.977664 |
| HSPE1          | 0.010791 | -0.4397  | 0.126291 |
| SEC61A1        | 0.027821 | 0.311952 | 0.202072 |
| LYZ            | 0.490639 | -0.24411 | 0.738656 |
| VBP1           | 0.051278 | 0.283187 | 0.265139 |
| STXBP1         | 0.809743 | 0.079057 | 0.921586 |
| B2M            | 0.185996 | -0.27207 | 0.478129 |
| DAD1           | 0.00841  | 0.41394  | 0.110127 |
| TGFB2          | 0.1647   | 0.92767  | 0.454525 |
| NPC2           | 0.454064 | -0.06854 | 0.712914 |
| COPZ1          | 0.075462 | 0.249236 | 0.320055 |
| GNG11          | 0.150898 | -1.43259 | 0.44125  |
| SUMO2          | 0.997368 | -0.31987 | 1        |
| UFM1           | 0.05451  | 0.330172 | 0.273313 |
| DCAF7          | 0.161013 | 0.146637 | 0.453012 |
| WDR5           | 0.28378  | 0.136147 | 0.586874 |
| AP1S1          | 0.641914 | -0.13238 | 0.835764 |
| NUTF2          | 0.709387 | -0.07423 | 0.869179 |
| HNRNPK         | 0.533067 | 0.080207 | 0.7709   |
| YWHAG          | 0.298858 | 0.15307  | 0.601676 |
| USP46          | 0.294284 | 0.46593  | 0.597457 |
| RRAS2          | 0.251082 | -0.29706 | 0.554953 |
| TIMM10         | 0.97632  | 0.067562 | 0.998921 |
| TSPAN5         | 0.410792 | 0.423641 | 0.683152 |
| RPS7           | 0.071226 | 0.125384 | 0.311134 |
| PPP1CA         | 0.102567 | 0.11087  | 0.364372 |
| PPP1CB         | 0.078771 | 0.165294 | 0.32578  |
| NCS1           | 0.044372 | 1.511983 | 0.24851  |
| PSMC1          | 0.084549 | 0.184891 | 0.335025 |
| PSMC5          | 0.034511 | 0.168998 | 0.222148 |
| RPS8           | 0.26355  | 0.027415 | 0.565873 |
| RPS15A         | 0.438315 | 0.025073 | 0.701933 |
| RPS16          | 0.675323 | -0.26879 | 0.853175 |
| UBE2G1         | 0.050419 | 0.880726 | 0.263221 |
| UBE2H          | 0.060535 | 0.715892 | 0.287134 |
| YWHAE          | 0.037428 | 0.214851 | 0.231646 |
| RPS14          | 0.819984 | -0.1005  | 0.92687  |
| RPS23          | 0.524435 | 0.029119 | 0.764023 |
| RPS18          | 0.577274 | -0.06757 | 0.796634 |
| RPS29          | 0.882011 | 0.331613 | 0.961515 |
| RPS13          | 0.272095 | 0.084614 | 0.575039 |
| RPS11          | 0.699592 | -0.16018 | 0.864146 |
| SNRPE          | 0.830256 | -0.05534 | 0.933615 |
| SNRPF          | 0.702009 | -0.69056 | 0.866168 |
| SNRPG;SNRPGP15 | 0.929044 | -0.02082 | 0.983115 |
| LSM3           | 0.646644 | -0.10726 | 0.837353 |
| LSM6           | 0.507385 | -0.79047 | 0.75153  |
| SNRPD1         | 0.680152 | -0.03928 | 0.85545  |
| SNRPD2         | 0.32085  | 0.137117 | 0.613139 |
| SNRPD3         | 0.255193 | 0.187413 | 0.557593 |
| TMSB4X         | 0.049723 | -0.87369 | 0.261364 |
| ARF6           | 0.434427 | 0.111687 | 0.698194 |
| PSMC6          | 0.175259 | 0.112501 | 0.466796 |
| SELT           | 0.902877 | 0.01905  | 0.971583 |
| TBPL1          | 0.948734 | -0.17755 | 0.990863 |
| RPL7A          | 0.014531 | 0.113855 | 0.147184 |

|                           |          |          |          |
|---------------------------|----------|----------|----------|
| POLR2G                    | 0.330585 | 0.72401  | 0.619341 |
| RAB11A                    | 0.623137 | 0.055545 | 0.825978 |
| ETF1                      | 0.175259 | 0.230991 | 0.466796 |
| ESRRG                     | 0.322009 | 0.17379  | 0.613139 |
| CNBP                      | 0.939534 | -0.11011 | 0.986498 |
| YPEL5                     | 0.310008 | -0.43506 | 0.609864 |
| RPS4X                     | 0.779221 | -0.13662 | 0.906856 |
| PPP2CB                    | 0.636994 | -0.56647 | 0.833511 |
| ACTA2                     | 0.546146 | 0.533769 | 0.778738 |
| RHOB                      | 0.934287 | 0.175252 | 0.984157 |
| RPL23A                    | 0.289748 | 0.234887 | 0.593134 |
| RPS6                      | 0.554955 | -0.18414 | 0.783439 |
| VSNL1                     | 6.45E-07 | 3.963015 | 0.000105 |
| HIST1H4A                  | 0.931332 | -0.00333 | 0.984157 |
| HIST1H2BC;HIST1H2BK;H2BFS | 0.127815 | -1.67494 | 0.407004 |
| RAB1A                     | 0.324076 | 0.207625 | 0.614309 |
| RAN                       | 0.407778 | 0.076856 | 0.680612 |
| RPL23                     | 0.093209 | -0.06143 | 0.347256 |
| RAP1A                     | 0.981581 | 0.0411   | 1        |
| UBE2D2                    | 0.422274 | 0.53999  | 0.691467 |
| RPS15                     | 0.098469 | 0.081408 | 0.357719 |
| RPS24                     | 0.117214 | 0.161513 | 0.389929 |
| RPS25                     | 0.216173 | 0.098303 | 0.512741 |
| RPS26;RPS26P11            | 0.067188 | 0.590806 | 0.302058 |
| RPS28                     | 0.228671 | 0.228416 | 0.528484 |
| FAU                       | 0.091605 | 0.084548 | 0.345626 |
| GNB1                      | 0.396661 | 0.111976 | 0.67382  |
| POLR2L                    | 0.350639 | 0.652809 | 0.635657 |
| RBX1                      | 0.568292 | 0.307566 | 0.791838 |
| GNB2                      | 0.799534 | -0.07225 | 0.916173 |
| RPL30                     | 0.171096 | -0.01617 | 0.461822 |
| RPL31                     | 0.744041 | 0.063564 | 0.888303 |
| RPL10A                    | 0.825116 | -0.02035 | 0.930395 |
| RPL32                     | 0.595428 | -0.25263 | 0.806337 |
| RPL11                     | 0.590866 | 0.041041 | 0.804875 |
| RPL8                      | 0.528742 | -0.32848 | 0.767576 |
| PPIA                      | 0.426712 | -0.08244 | 0.693599 |
| FKBP1A                    | 0.850885 | -0.04063 | 0.944945 |
| RPS27A;UBB;UBC            | 0.81486  | 0.041084 | 0.924847 |
| UBA52                     | 0.845785 | -0.014   | 0.942239 |
| GRB2                      | 0.759058 | 0.043767 | 0.896847 |
| TRA2B                     | 0.035653 | 0.335513 | 0.225452 |
| RAC1                      | 0.81486  | -0.06305 | 0.924847 |
| AP2B1                     | 0.00023  | 0.257306 | 0.011713 |
| VAMP2                     | 0.876813 | 0.241486 | 0.958859 |
| GNAS                      | 0.289748 | 0.146952 | 0.593134 |
| GNAI1                     | 0.12841  | -0.20255 | 0.407846 |
| PPP3R1                    | 0.204174 | 0.189695 | 0.497963 |
| YWHAZ                     | 0.093209 | 0.225931 | 0.347256 |
| UBE2B                     | 0.406996 | 0.734585 | 0.680612 |
| PPP2R2A                   | 0.133456 | 0.241674 | 0.416228 |
| SNRPN                     | 0.396661 | 0.108711 | 0.67382  |
| SUMO1                     | 0.729121 | 0.229575 | 0.879656 |
| DYNLL1                    | 0.438315 | 0.065246 | 0.701933 |
| DYNLT1                    | 0.929044 | 0.114484 | 0.983115 |
| RPL38                     | 0.33388  | 0.065277 | 0.620902 |
| SKP1                      | 0.699592 | 0.01148  | 0.864146 |
| GNG5                      | 0.244338 | 0.303019 | 0.547425 |

|                        |          |          |          |
|------------------------|----------|----------|----------|
| RPS21                  | 0.646644 | -0.04785 | 0.837353 |
| EIF5A;EIF5AL1          | 0.1068   | 0.171205 | 0.371671 |
| GNB2L1                 | 0.004424 | 0.244661 | 0.076312 |
| ACTG1                  | 0.474191 | 0.152709 | 0.727018 |
| ACTG2                  | 0.044471 | 1.165008 | 0.24851  |
| SUPT4H1                | 0.955125 | -0.14468 | 0.993074 |
| UBE2I                  | 0.586319 | 0.047724 | 0.801141 |
| SEPW1                  | 0.1787   | 1.19301  | 0.47055  |
| TMSB10                 | 0.382127 | 0.107308 | 0.661698 |
| TNNC1                  |          | 0        |          |
| PPP2CA                 | 0.1882   | 0.15694  | 0.480067 |
| YBX1                   | 0.061485 | 0.347003 | 0.289565 |
| SEC11A                 | 0.126762 | 0.214041 | 0.403998 |
| CSNK2B                 | 0.04253  | 0.300213 | 0.243142 |
| TPM4                   | 0.000191 | 0.576472 | 0.010256 |
| ACTC1                  | 0.039276 | 0.324951 | 0.236232 |
| UBE2L3                 | 0.923804 | 0.056126 | 0.980751 |
| EEF1A1;EEF1A1P5        | 0.1068   | 0.150787 | 0.371671 |
| ACTA1                  | 0.058974 | 0.743072 | 0.283643 |
| TUBA1B                 | 0.020421 | 0.268681 | 0.170514 |
| TUBA4A                 | 0.586319 | 0.070199 | 0.801141 |
| TUBB4B                 | 0.024706 | 0.265153 | 0.190022 |
| CSNK2A1                | 0.434427 | -0.01582 | 0.698194 |
| PAFAH1B2               | 0.794443 | 0.058089 | 0.913708 |
| HIST1H3A;HIST3H3;H3F3C | 0.623127 | 0.70148  | 0.825978 |
| UBXN2A                 | 0.375606 | -0.48683 | 0.657384 |
| HBB                    | 0.462013 | -0.09712 | 0.718747 |
| HBG1                   | 0.16297  | -1.14114 | 0.453012 |
| HBG2                   | 0.267796 | -0.93585 | 0.570195 |
| HBA1                   | 0.658897 | -0.1105  | 0.843859 |
| CXADR                  | 0.100661 | -0.87416 | 0.361539 |
| FAM193A                | 0.093082 | 0.551047 | 0.347256 |
| SH3BP2                 | 0.09103  | 0.803001 | 0.344815 |
| NOP14                  | 0.199309 | 0.549476 | 0.49217  |
| IGBP1                  | 0.012537 | 0.723014 | 0.136468 |
| SIRPA                  | 0.520146 | 0.193169 | 0.760272 |
| ADAM8                  | 0.059989 | 1.37548  | 0.286703 |
| CYP4F2                 | 0.079293 | 0.318702 | 0.32578  |
| PSPH                   | 1        | -0.16112 | 1        |
| RBM6                   | 0.003951 | 1.418433 | 0.071362 |
| EIF4G2                 | 0.015629 | 0.305533 | 0.152856 |
| RPP38                  | 0.688054 | -0.21801 | 0.85937  |
| RPP30                  | 0.005656 | 0.881343 | 0.088608 |
| GTF2I                  | 0.632496 | -0.0282  | 0.830965 |
| PIP4K2B                | 0.008168 | 0.601944 | 0.108493 |
| CNTNAP1                | 0.001516 | 1.671301 | 0.03994  |
| SRPK2                  | 0.029993 | 0.146193 | 0.209097 |
| PHC1                   | 0.27536  | 0.299033 | 0.578109 |
| CSNK1G2                | 0.542931 | -0.36361 | 0.776386 |
| CLDN10                 | 0.873013 | 0.160267 | 0.956872 |
| CCT2                   | 0.371444 | -0.08064 | 0.65423  |
| OLR1                   | 0.312494 | 0.360376 | 0.610732 |
| SLC35A2                | 0.665637 | 0.048833 | 0.847351 |
| SLC35A1                | 0.370809 | -1.0247  | 0.65423  |
| SLC35B1                | 0.015013 | 2.132438 | 0.150049 |
| KRT85                  | 0.996791 | -0.15656 | 1        |
| RAE1                   | 0.14042  | 0.233058 | 0.426568 |
| BTN3A2                 | 0.155704 | -0.84776 | 0.445884 |

|          |          |          |          |
|----------|----------|----------|----------|
| GSTO1    | 0.892438 | 0.042516 | 0.966699 |
| CX3CL1   | 0.075543 | 0.816902 | 0.320278 |
| JAG1     | 0.224923 | 0.341065 | 0.52386  |
| ST5      | 3.42E-05 | 1.70433  | 0.002581 |
| PRKDC    | 0.016204 | 0.2484   | 0.154611 |
| ADAM17   | 0.019715 | 0.582544 | 0.1684   |
| BLOC1S1  | 0.106766 | 0.637118 | 0.371671 |
| SRPX     | 0.017671 | 1.645582 | 0.161012 |
| ARG2     | 0.123603 | 0.72749  | 0.399439 |
| ELF3     | 0.894777 | -0.24909 | 0.968678 |
| NTHL1    | 0.438526 | -0.49106 | 0.701933 |
| IL13RA1  | 0.449841 | 0.206967 | 0.709598 |
| CCL20    | 0.200937 | 1.120316 | 0.494254 |
| MAP1A    | 8.70E-07 | 2.020629 | 0.000136 |
| CRADD    | 0.000816 | 2.334479 | 0.027022 |
| PHEX     | 0.140267 | -0.72101 | 0.426568 |
| ADARB1   | 0.070106 | 0.948935 | 0.309184 |
| HLA-DRB3 | 0.86966  | 0.650067 | 0.955842 |
| GPLD1    | 0.841655 | -0.08338 | 0.940155 |
| LCN2     | 0.575013 | -0.69871 | 0.796599 |
| IFI35    | 0.327323 | 0.188689 | 0.617719 |
| MT1X     | 0.011262 | 2.419287 | 0.12877  |
| NUCB2    | 0.199513 | 0.196558 | 0.49217  |
| HSD11B2  | 0.527568 | 0.32722  | 0.767277 |
| DLK1     | 0.319672 | 0.151316 | 0.613139 |
| ABAT     | 0.484434 | 0.202045 | 0.735121 |
| S100A12  | 0.762223 | 0.695592 | 0.899242 |
| BASP1    | 0.002    | 0.697048 | 0.047089 |
| IGLV3-21 | 0.876747 | -0.24903 | 0.958859 |
| HAMP     | 0.433996 | 0.445878 | 0.698194 |
| DCD      | 0.405567 | -0.86668 | 0.679973 |
| SSBP2    | 0.528824 | 0.34954  | 0.767592 |
| TMF1     | 0.11568  | 0.357861 | 0.387731 |
| MRPS22   | 0.169043 | 0.225397 | 0.459676 |
| MRPS25   | 0.013753 | 0.607124 | 0.143228 |
| MRPS10   | 0.007931 | 1.136344 | 0.107292 |
| MRPS35   | 0.164991 | 0.068208 | 0.454525 |
| MRPS5    | 0.902862 | -0.1217  | 0.971583 |
| MRPS36   | 0.06524  | -0.12867 | 0.298136 |
| MRPS11   | 0.366062 | 0.461011 | 0.648976 |
| MRPS15   | 0.366062 | -0.62823 | 0.648976 |
| MRPS21   | 0.789328 | 0.131714 | 0.911483 |
| MRPS34   | 0.871617 | -0.03405 | 0.956098 |
| MRPS6    | 0.923803 | -0.24584 | 0.980751 |
| MRPS9    | 0.024286 | 0.325317 | 0.188496 |
| HMGN5    | 0.678898 | -0.0463  | 0.855378 |
| SARNP    | 0.809743 | 0.07959  | 0.921586 |
| RBP5     | 0.322796 | -0.6702  | 0.613707 |
| ADAMTSL3 | 0.956936 | -0.1293  | 0.994122 |
| HTRA4    | 0.995826 | -0.04281 | 1        |
| HTRA3    | 7.06E-05 | 1.603373 | 0.004747 |
| LACTB    | 0.05791  | 0.336076 | 0.280499 |
| COG7     | 0.204174 | 0.349166 | 0.497963 |
| RPL24    | 0.507389 | -0.09112 | 0.75153  |
| TXNL4A   | 0.520106 | 0.455367 | 0.760272 |
| RPL36A   | 0.850121 | 0.169233 | 0.944945 |
| CBX1     | 0.008743 | 0.392463 | 0.112752 |
| SMAD3    | 0.269225 | 0.580366 | 0.571371 |

|            |          |          |          |
|------------|----------|----------|----------|
| ARF1       | 0.830256 | 0.078109 | 0.933615 |
| ARF5       | 0.179497 | -0.29434 | 0.471072 |
| ERH        | 0.684992 | 0.082767 | 0.85709  |
| RHOG       | 0.1068   | 0.14851  | 0.371671 |
| RPL19      | 0.819984 | -0.15078 | 0.92687  |
| SERF2      | 0.741942 | 0.380414 | 0.887847 |
| SRSF3      | 0.660922 | 0.140313 | 0.844596 |
| MXRA7      | 0.249719 | 0.727093 | 0.552833 |
| H3F3A      | 0.749036 | -0.22569 | 0.890902 |
| FO XK1     | 0.015911 | 0.770297 | 0.153751 |
| ARHGAP8    | 0.642252 | 0.191817 | 0.835764 |
| PRR5       | 0.141292 | 0.520032 | 0.427981 |
| RPP14      | 0.243159 | 0.870272 | 0.546811 |
| ZBED6      | 0.045973 | 0.36574  | 0.252361 |
| CCZ1;CCZ1B | 0.002334 | 0.397249 | 0.052291 |
| TNFAIP6    | 0.229479 | 0.399101 | 0.529537 |
| DAB2       | 0.05207  | 0.494144 | 0.267367 |
| MUC5AC     | 0.482512 | -0.8305  | 0.73359  |
| FBLN2      | 6.74E-06 | 0.888564 | 0.000698 |
| DGCR2      | 0.207717 | 0.754492 | 0.502361 |
| VLDLR      | 0.116461 | 0.596015 | 0.389223 |
| HSPG2      | 0.554955 | 0.01139  | 0.783439 |
| LRP2       | 0.318749 | -0.53223 | 0.613139 |
| XIAP       | 0.006131 | 0.568411 | 0.092018 |
| ARHGAP4    | 0.247021 | 0.220062 | 0.549922 |
| EFNB1      | 0.881497 | -0.10941 | 0.961515 |
| FAM3A      | 0.710351 | 0.567646 | 0.870073 |
| RBM10      | 0.171096 | 0.348982 | 0.461822 |
| RBM3       | 0.138653 | 0.404365 | 0.424105 |
| ATP2C1     | 0.739057 | 0.070342 | 0.886253 |
| ATP11A     | 0.101185 | -0.76564 | 0.361901 |
| ATP8B2     | 0.095134 | 0.494954 | 0.35136  |
| CYCS       | 0.177368 | 0.334491 | 0.468602 |
| MPP1       | 0.392997 | 0.041237 | 0.671013 |
| TFAM       | 0.533062 | -0.0824  | 0.7709   |
| PITPNA     | 0.057044 | 0.450237 | 0.278658 |
| MAT1A      | 0.686212 | -0.40621 | 0.857929 |
| SLC25A3    | 0.840557 | -0.02946 | 0.939212 |
| HDLBP      | 2.69E-05 | 0.509386 | 0.002129 |
| GTF2B      | 0.380288 | -0.24276 | 0.661698 |
| CDK6       | 0.317161 | 0.3412   | 0.613139 |
| CDK5       | 0.577274 | 0.260241 | 0.796634 |
| CDK16      | 0.436369 | 0.303189 | 0.700907 |
| CDK17      | 0.000528 | 1.393135 | 0.02098  |
| PURA       | 0.078771 | -0.1883  | 0.32578  |
| CDC42EP1   | 0.000672 | 1.629799 | 0.024319 |
| CLTC       | 0.062406 | 0.179354 | 0.292127 |
| HSF1       | 0.003025 | 1.070534 | 0.062294 |
| NFKB2      | 0.018697 | 0.436373 | 0.165633 |
| FKBP3      | 0.520146 | 0.093558 | 0.760272 |
| PLCB2      | 0.088785 | 0.275861 | 0.34076  |
| REEP5      | 0.794443 | -0.04295 | 0.913708 |
| SORD       | 0.330591 | -0.28716 | 0.619341 |
| HNRNPU     | 0.804634 | 0.114292 | 0.918848 |
| IRF9       | 0.013253 | 1.162558 | 0.141015 |
| SPTBN1     | 0.324076 | -0.1143  | 0.614309 |
| TIAL1      | 0.005322 | 0.36522  | 0.086174 |
| E2F1       | 0.092612 | 0.566786 | 0.347013 |

|          |          |          |          |
|----------|----------|----------|----------|
| SET      | 0.066208 | 0.396426 | 0.300455 |
| SCN7A    | 0.069187 | -1.22228 | 0.306571 |
| SRSF2    | 0.714303 | -0.02164 | 0.87164  |
| FO XK2   | 0.059733 | 1.124566 | 0.285807 |
| RUNX1    | 6.97E-05 | 0.834763 | 0.00473  |
| RELB     | 0.059395 | 0.885309 | 0.285461 |
| MS4A2    | 0.540968 | 0.277723 | 0.775521 |
| GALK2    | 0.280717 | 0.24004  | 0.583434 |
| AMPD3    | 0.204174 | 0.243281 | 0.497963 |
| AMPD2    | 0.00719  | 0.404937 | 0.101457 |
| CTBS     | 0.101865 | -0.75761 | 0.363392 |
| FABP5    | 0.486499 | -0.08452 | 0.73612  |
| ANK2     | 0.845668 | -0.13403 | 0.942239 |
| CAP1     | 0.426712 | 0.122977 | 0.693599 |
| DEFA5    | 0.784838 | 0.227759 | 0.909861 |
| FLI1     | 0.138535 | 0.996665 | 0.424105 |
| HMGCS1   | 0.723762 | 0.835513 | 0.876654 |
| IFITM3   | 0.000261 | 1.627079 | 0.012879 |
| IL1RL1   | 0.331588 | -0.08594 | 0.619341 |
| SLC7A5   | 0.086339 | 0.288327 | 0.33706  |
| DR1      | 0.001363 | 0.583282 | 0.036688 |
| TFAP4    | 0.273877 | 0.689728 | 0.577625 |
| FMO1     | 0.014952 | 1.856881 | 0.150049 |
| EXOSC10  | 0.185996 | 0.240829 | 0.478129 |
| OTUD4    | 0.147477 | 0.53409  | 0.436386 |
| PFKP     | 0.09581  | 0.401936 | 0.352331 |
| XPC      | 0.183786 | -0.52408 | 0.474829 |
| EWSR1    | 0.120332 | 0.268975 | 0.39497  |
| CDR2     | 0.701336 | 0.241921 | 0.865627 |
| COL4A3   | 0.534725 | -0.27778 | 0.772118 |
| OCRL     | 0.030249 | 0.609972 | 0.209418 |
| PLCB3    | 0.466081 | 0.08455  | 0.721065 |
| ROR1     | 0.086969 | 0.921794 | 0.337854 |
| ROR2     | 3.02E-07 | 2.928069 | 6.08E-05 |
| TAGLN    | 4.64E-05 | 0.836462 | 0.003385 |
| AKAP17A  | 0.354029 | 0.568188 | 0.638094 |
| MYL5     | 0.322009 | 0.13512  | 0.613139 |
| MEF2A    | 0.57907  | -0.10245 | 0.796675 |
| NAAA     | 0.773946 | -0.23244 | 0.903913 |
| SP2      | 0.238305 | 0.492646 | 0.540624 |
| RHAG     | 0.203986 | 0.760343 | 0.497963 |
| GUCY1A3  | 0.134935 | 0.525546 | 0.417833 |
| DHODH    | 0.779219 | -0.08391 | 0.906856 |
| GUCY1B3  | 0.590866 | 0.110792 | 0.804875 |
| PRKCE    | 0.233658 | -0.40975 | 0.535403 |
| OGDH     | 0.14042  | -0.18438 | 0.426568 |
| TNFRSF17 | 0.655601 | -0.27999 | 0.84209  |
| KIF23    | 0.096067 | 1.012272 | 0.352925 |
| ALDH6A1  | 0.0334   | -0.38383 | 0.219585 |
| NRG1     | 0.079293 | 0.392277 | 0.32578  |
| CYP27A1  | 1        | 0.03059  | 1        |
| BDH1     | 0.038652 | -0.63317 | 0.235412 |
| SEMG2    | 0.09909  | -0.63591 | 0.358568 |
| COL7A1   | 0.211261 | 0.829001 | 0.506632 |
| APBA1    | 0.483801 | 0.430055 | 0.735071 |
| DSG1     | 0.186803 | 0.726749 | 0.479162 |
| SP4      | 0.711754 | 0.149531 | 0.870161 |
| SP3      | 0.063323 | 1.546328 | 0.294055 |

|          |          |          |          |
|----------|----------|----------|----------|
| DSC2     | 0.604318 | 0.153527 | 0.813002 |
| MUC3A    | 0.310183 | -0.23894 | 0.609864 |
| HIST1H1A | 0.046096 | 1.280553 | 0.252472 |
| RPL18A   | 0.257958 | -0.24037 | 0.560462 |
| IRF8     | 0.042978 | 1.112263 | 0.245328 |
| GCNT1    | 0.175825 | 0.858815 | 0.46742  |
| MAP2K1   | 0.048208 | -0.56526 | 0.257798 |
| TEK      | 0.972173 | -0.12571 | 0.997906 |
| FKBP4    | 0.759058 | -0.05906 | 0.896847 |
| PLOD1    | 1.80E-08 | 1.182293 | 6.25E-06 |
| MUC2     | 0.488557 | 0.369091 | 0.738428 |
| NUCB1    | 0.32085  | 0.14899  | 0.613139 |
| RASSF7   | 0.661575 | 0.282453 | 0.84482  |
| RPL6     | 0.908103 | -0.17311 | 0.9734   |
| TOP2B    | 0.167008 | 0.177415 | 0.457139 |
| CREB5    | 0.992139 | -0.03236 | 1        |
| AKAP12   | 0.018368 | 0.505706 | 0.163766 |
| SLC25A11 | 0.660922 | 0.043393 | 0.844596 |
| CFHR3    | 0.119848 | -1.15225 | 0.394783 |
| DST      | 0.000172 | 1.077355 | 0.009509 |
| GSTM4    | 0.315992 | 0.834672 | 0.613139 |
| CREM     | 0.657906 | -0.14997 | 0.842898 |
| MLLT1    | 0.024774 | 1.357552 | 0.190411 |
| MECOM    | 0.294609 | -0.54036 | 0.597898 |
| GNA12    | 0.090519 | 1.07935  | 0.343901 |
| CAV1     | 0.537409 | -0.24869 | 0.773175 |
| ACY1     | 0.108187 | -0.09016 | 0.374055 |
| KMT2A    | 0.902845 | 0.043847 | 0.971583 |
| TGFBR3   | 0.86384  | 0.010168 | 0.951898 |
| TNFAIP2  | 0.121915 | 0.520025 | 0.397343 |
| CENPC    | 0.025634 | 1.350279 | 0.193538 |
| LMNB2    | 0.950035 | 0.059078 | 0.990863 |
| PTS      | 0.20074  | 0.506599 | 0.494233 |
| PLAUR    | 0.000796 | 1.717703 | 0.026879 |
| MVK      | 0.950034 | 0.33715  | 0.990863 |
| ERCC6    | 0.803788 | -0.21688 | 0.918848 |
| TAP1     | 0.247021 | 0.253574 | 0.549922 |
| TAP2     | 0.305036 | 0.251528 | 0.606083 |
| CFHR1    | 0.044589 | 0.637076 | 0.24851  |
| COL10A1  | 0.000557 | 2.829539 | 0.02176  |
| CEBPZ    | 0.274985 | 0.167574 | 0.577625 |
| RELA     | 0.407778 | 0.12075  | 0.680612 |
| UBXN1    | 0.044589 | 0.47953  | 0.24851  |
| GBE1     | 0.646644 | 0.037904 | 0.837353 |
| FOLH1    | 0.000327 | 2.128385 | 0.015317 |
| EIF4G1   | 0.016499 | 0.293838 | 0.155558 |
| ATP7A    | 0.902874 | -0.03192 | 0.971583 |
| KRT17    | 0.656149 | 0.082396 | 0.84209  |
| NOTCH2   | 0.110397 | 0.556508 | 0.378842 |
| TLE1     | 0.426641 | 0.381782 | 0.693599 |
| TLE2     | 0.416636 | -0.21103 | 0.687635 |
| TLE3     | 0.286748 | 0.554392 | 0.590053 |
| HGFAC    | 0.912712 | 0.023793 | 0.975706 |
| PRKCQ    | 0.475114 | -0.38083 | 0.728131 |
| GLO1     | 0.81486  | 0.045062 | 0.924847 |
| ACVR1    | 0.674864 | 0.178564 | 0.853175 |
| HLA-B    | 0.479044 | -0.42856 | 0.731627 |
| AKR1C1   | 0.206491 | -0.96644 | 0.500256 |



|          |          |          |          |
|----------|----------|----------|----------|
| SSBP1    | 0.559385 | -0.19228 | 0.78633  |
| REL      | 0.87161  | 0.100935 | 0.956098 |
| MST1R    | 0.389976 | 0.528474 | 0.668401 |
| YWHAH    | 0.050495 | 0.242934 | 0.263221 |
| PLP2     | 0.374911 | 0.65564  | 0.656862 |
| CSTF1    | 0.05451  | 0.336195 | 0.273313 |
| ICA1     | 0.354007 | -0.20055 | 0.638094 |
| UBE3A    | 0.213733 | 0.399027 | 0.509228 |
| DNM1     | 1.20E-07 | 2.142944 | 2.71E-05 |
| PTPN12   | 0.015348 | 0.577973 | 0.151713 |
| CLC      | 0.41184  | 0.920301 | 0.683152 |
| PTK2     | 0.511623 | 0.139302 | 0.754376 |
| LIPE     | 0.013628 | 0.996127 | 0.14262  |
| ZNF91    | 0.683128 | 0.146126 | 0.85709  |
| PRKCZ    | 0.064541 | -1.04812 | 0.296805 |
| ZBTB16   | 0.988991 | 0.063427 | 1        |
| SRSF11   | 0.015629 | 0.399297 | 0.152856 |
| EEF1A2   | 0.083056 | 1.596682 | 0.332962 |
| PRKCD    | 0.311298 | -0.23669 | 0.609894 |
| CALD1    | 3.49E-09 | 1.109535 | 2.42E-06 |
| COL14A1  | 0.426712 | 0.157151 | 0.693599 |
| RNASEL   | 0.191531 | 0.61063  | 0.485658 |
| FPGS     | 0.475812 | 0.59547  | 0.728899 |
| SLC18A2  | 0.31899  | 0.280966 | 0.613139 |
| MBTD1    | 0.306086 | 0.158809 | 0.607626 |
| CTDSPL2  | 0.564362 | 0.586099 | 0.790121 |
| FAM160A1 | 0.267466 | -0.48829 | 0.570195 |
| ITIH3    | 0.442197 | 0.636828 | 0.703704 |
| PTPN11   | 0.053686 | 0.216552 | 0.271145 |
| KDSR     | 0.411524 | -0.00986 | 0.683152 |
| REG3A    | 0.988567 | 0.009614 | 1        |
| BTK      | 0.804632 | -0.10119 | 0.918848 |
| PPP2R3A  | 0.062595 | 0.689434 | 0.29268  |
| PPAT     | 0.059672 | 0.356565 | 0.285693 |
| GFPT1    | 0.699592 | 0.066639 | 0.864146 |
| EXOSC9   | 0.078755 | 0.966146 | 0.32578  |
| AOX1     | 0.296535 | -0.73319 | 0.599275 |
| PSME1    | 0.646644 | -0.07622 | 0.837353 |
| RBPJ     | 0.371444 | 0.171945 | 0.65423  |
| MEF2C    | 0.157368 | 1.147325 | 0.447293 |
| TYRO3    | 0.178261 | 0.223037 | 0.469506 |
| APLP2    | 0.960544 | -0.21753 | 0.994122 |
| GABPA    | 0.897655 | -0.04233 | 0.969793 |
| GABPB1   | 0.36297  | 0.610486 | 0.646802 |
| RING1    | 0.675324 | 0.06696  | 0.853175 |
| FMR1     | 0.159052 | 0.330921 | 0.449897 |
| FMOD     | 3.16E-06 | 2.104476 | 0.000377 |
| PRDX1    | 0.360948 | -0.13723 | 0.644411 |
| HLA-C    | 0.482377 | 0.088373 | 0.733586 |
| CDK18    | 0.200159 | 0.860935 | 0.493326 |
| RPL18    | 0.255191 | 0.14765  | 0.557593 |
| C1QBP    | 0.076552 | 0.252813 | 0.322705 |
| CKAP4    | 4.26E-05 | 0.608203 | 0.00315  |
| ENPEP    | 0.067173 | 0.951042 | 0.302058 |
| COL16A1  | 0.023298 | 1.153484 | 0.18431  |
| CD69     | 0.260391 | -0.87361 | 0.56373  |
| TJP1     | 0.709387 | 0.051291 | 0.869179 |
| CXCL9    | 1        | -0.04159 | 1        |

|          |          |          |          |
|----------|----------|----------|----------|
| PDE4B    | 0.733732 | -0.0786  | 0.882858 |
| ZFP36L1  | 0.002793 | 2.075751 | 0.059562 |
| DPT      | 0.734083 | -0.05286 | 0.882858 |
| SPAG1    | 0.603247 | 0.257238 | 0.813002 |
| TFF3     | 0.293581 | -0.87927 | 0.596247 |
| KHDRBS1  | 0.072266 | 0.302539 | 0.313701 |
| BAX      | 0.2958   | 0.174522 | 0.598344 |
| BCL2L1   | 0.583348 | 0.362757 | 0.799544 |
| MCL1     | 0.143484 | 1.221458 | 0.43162  |
| SLC3A1   | 0.181133 | -0.33622 | 0.472575 |
| POLE     | 0.031311 | 1.239025 | 0.212999 |
| KLC1     | 0.019032 | 0.324248 | 0.166597 |
| SOS1     | 0.012403 | 1.102039 | 0.135929 |
| SOS2     | 0.212175 | 0.475769 | 0.508038 |
| TNK2     | 0.488022 | 0.229237 | 0.738022 |
| LRP1     | 0.002    | 0.546076 | 0.047089 |
| SRSF1    | 0.623137 | 0.119769 | 0.825978 |
| ARHGAP1  | 0.000528 | 0.418202 | 0.02098  |
| CYP24A1  | 0.068539 | 0.973369 | 0.305289 |
| AES      | 0.063557 | 1.417965 | 0.29482  |
| SRSF4    | 0.81486  | -0.14306 | 0.924847 |
| PCDH1    | 0.660672 | -0.08698 | 0.844596 |
| TGM3     | 0.571349 | 0.062786 | 0.793891 |
| PPP3CA   | 0.454064 | 0.131361 | 0.712914 |
| DHX9     | 0.049723 | 0.201402 | 0.261364 |
| CRYZ     | 0.109698 | -0.28151 | 0.377423 |
| IL10RB   | 0.171491 | 0.499208 | 0.462438 |
| DDR1     | 0.182991 | -0.47305 | 0.474175 |
| SLC20A2  | 0.566553 | -0.50916 | 0.791838 |
| GOLGA3   | 0.043893 | 0.256994 | 0.247494 |
| GOLGA2   | 0.486499 | 0.095197 | 0.73612  |
| LGALS3BP | 0.118765 | 0.342353 | 0.392409 |
| LOXL1    | 3.45E-07 | 3.233771 | 6.59E-05 |
| EHHADH   | 0.72417  | -0.114   | 0.876654 |
| MFGE8    | 0.00511  | 0.91294  | 0.083708 |
| CYP4F3   | 0.497809 | 0.406927 | 0.744799 |
| DMTN     | 0.186908 | -0.90959 | 0.479162 |
| PDE4D    | 0.514015 | -0.53433 | 0.756193 |
| DSC1     | 0.221132 | 0.602219 | 0.519064 |
| HDHD1    | 0.206699 | -0.99434 | 0.500547 |
| CD47     | 0.247021 | -0.22509 | 0.549922 |
| PPID     | 0.244338 | 0.285931 | 0.547425 |
| FGL1     | 0.631585 | -0.10554 | 0.830965 |
| SSRP1    | 0.004517 | 0.438731 | 0.077667 |
| RBL2     | 0.303767 | 0.350757 | 0.605949 |
| CAMSAP2  | 0.007817 | 1.267534 | 0.106243 |
| SPIRE1   | 0.491645 | 0.240325 | 0.739769 |
| SLFN5    | 0.050495 | 0.194976 | 0.263221 |
| MZT1     | 0.259673 | 0.842576 | 0.563057 |
| C2orf54  | 0.357796 | -0.63746 | 0.641914 |
| VAC14    | 0.02152  | 0.379588 | 0.175496 |
| SIGLEC14 | 0.331588 | -0.14096 | 0.619341 |
| NSUN2    | 0.438315 | 0.164234 | 0.701933 |
| RBBP4    | 0.05207  | 0.35676  | 0.267367 |
| NCBP1    | 0.047465 | 0.277825 | 0.255923 |
| MGAT3    | 0.464202 | -0.2857  | 0.721065 |
| MGAT5    | 0.000451 | 2.03127  | 0.019184 |
| EP300    | 0.02152  | 0.545528 | 0.175496 |

|          |          |          |          |
|----------|----------|----------|----------|
| AHNAK    | 0.120332 | 0.300202 | 0.39497  |
| NIPAL4   | 0.300882 | 0.40929  | 0.602797 |
| SLC10A7  | 0.026184 | 1.0305   | 0.194901 |
| TBC1D8B  | 0.061618 | 1.079362 | 0.290071 |
| FCHO2    | 0.595428 | 0.184113 | 0.806337 |
| TMEM62   | 0.219293 | 0.820114 | 0.517045 |
| ELP6     | 0.129468 | 0.8925   | 0.410218 |
| APOBR    | 0.020414 | 0.857719 | 0.170514 |
| HSPA14   | 0.053686 | 0.629551 | 0.271145 |
| SCRN3    | 0.114883 | 0.710085 | 0.387168 |
| C5orf28  | 0.927689 | 0.041418 | 0.983115 |
| CGNL1    | 0.197206 | -0.45206 | 0.490309 |
| LAMTOR4  | 0.494732 | 0.39305  | 0.741997 |
| NEXN     | 0.000168 | 1.117706 | 0.009401 |
| MGAT2    | 0.086954 | 0.593057 | 0.337854 |
| GALNT2   | 0.006131 | 0.581129 | 0.092018 |
| GALNT1   | 0.001082 | 0.718422 | 0.031645 |
| AP1B1    | 0.179497 | 0.154374 | 0.471072 |
| CPSF1    | 0.161013 | 0.273891 | 0.453012 |
| TEF      | 0.393617 | 0.252571 | 0.671013 |
| BST1     | 0.274985 | 0.281648 | 0.577625 |
| BST2     | 0.086954 | -0.60329 | 0.337854 |
| PMPCA    | 0.944783 | -0.00337 | 0.988547 |
| FUT2     | 0.500258 | 0.231266 | 0.745947 |
| ST3GAL1  | 0.128525 | 1.128835 | 0.408017 |
| ST3GAL4  | 0.002302 | 1.815009 | 0.051684 |
| KIF1A    | 0.69435  | 0.090939 | 0.861478 |
| SCRN1    | 0.520146 | 0.023936 | 0.760272 |
| KIAA0195 | 0.791917 | -0.09227 | 0.913596 |
| KIAA0196 | 0.001272 | 0.319314 | 0.034924 |
| NUP160   | 0.011856 | 0.345511 | 0.13136  |
| SCAP     | 0.201224 | 0.591007 | 0.494631 |
| SREBF2   | 0.576266 | 0.201218 | 0.796634 |
| ARHGEF5  | 0.403328 | -0.44263 | 0.678271 |
| FOXO1    | 0.015821 | 0.840277 | 0.153751 |
| TBL3     | 0.382127 | 0.162489 | 0.661698 |
| GTF3C1   | 0.007479 | 0.518476 | 0.10395  |
| KCNMA1   | 0.084236 | 0.834977 | 0.335025 |
| TWF1     | 0.008089 | 0.416082 | 0.107782 |
| HYAL1    | 0.988991 | 0.063968 | 1        |
| ASPH     | 0.272095 | 0.240949 | 0.575039 |
| TFCP2    | 0.038652 | 0.537221 | 0.235412 |
| AKAP13   | 0.181644 | -0.40845 | 0.472575 |
| EFEMP1   | 0.000657 | 0.716306 | 0.023973 |
| TRO      | 0.701126 | 0.17634  | 0.865518 |
| SMARCB1  | 0.360948 | 0.130541 | 0.644411 |
| BPTF     | 0.470024 | 0.141312 | 0.72456  |
| CDC20    | 0.552775 | 0.369933 | 0.783393 |
| FSTL1    | 0.001081 | 1.399461 | 0.031645 |
| STX4     | 0.774166 | 0.134271 | 0.903913 |
| GRSF1    | 0.595428 | 0.10852  | 0.806337 |
| MAP4K2   | 0.027888 | 0.871393 | 0.202292 |
| NFIA     | 0.56708  | 0.563657 | 0.791838 |
| CNTN1    | 0.620263 | -0.21668 | 0.823971 |
| CDH17    | 0.340315 | 0.386829 | 0.627258 |
| MERTK    | 0.568314 | 0.391842 | 0.791838 |
| SFSWAP   | 0.002687 | 1.75797  | 0.057778 |
| CHD3     | 0.001055 | 1.448861 | 0.031507 |

|         |          |          |          |
|---------|----------|----------|----------|
| SF3A3   | 0.103963 | 0.229478 | 0.366863 |
| DPYD    | 0.507389 | 0.311736 | 0.75153  |
| FAP     | 1.49E-09 | 1.800866 | 1.33E-06 |
| TP53BP1 | 0.000155 | 0.703092 | 0.008818 |
| HYAL2   | 0.485484 | 0.444561 | 0.736044 |
| TMEM115 | 0.460493 | 0.863822 | 0.71823  |
| IFRD2   | 0.503183 | -0.363   | 0.747596 |
| TRIM26  | 0.213733 | 0.14943  | 0.509228 |
| AIMP1   | 0.764084 | -0.10119 | 0.899242 |
| ILF2    | 0.002283 | 0.371082 | 0.051363 |
| ILF3    | 0.045294 | 0.243862 | 0.250872 |
| LMAN2   | 0.103963 | 0.184276 | 0.366863 |
| LRMP    | 0.091269 | 1.014589 | 0.345435 |
| PTPRJ   | 0.298858 | 0.027171 | 0.601676 |
| PTPN13  | 0.443823 | 0.525546 | 0.705524 |
| EPS8    | 0.462056 | 0.124101 | 0.718747 |
| TRAP1   | 0.997369 | 0.060787 | 1        |
| TRAF2   | 0.819974 | 0.083056 | 0.92687  |
| FOXF1   | 0.309279 | -0.48454 | 0.609864 |
| ANK3    | 0.003368 | -0.90518 | 0.066236 |
| DLG1    | 0.572777 | 0.124493 | 0.794481 |
| TAF10   | 0.350482 | -0.37593 | 0.635657 |
| MYO1E   | 0.000139 | 0.630914 | 0.008094 |
| NFATC3  | 0.062711 | 1.34503  | 0.292924 |
| PPP1R8  | 0.075462 | 0.351519 | 0.320055 |
| PTP4A2  | 0.114161 | -0.19321 | 0.385201 |
| ABR     | 9.82E-05 | 0.665763 | 0.006224 |
| NPRL3   | 0.529222 | 0.425787 | 0.767971 |
| BNIP1   | 0.774166 | -0.1094  | 0.903913 |
| BNIP2   | 0.453061 | -0.28403 | 0.712914 |
| BNIP3   | 0.991673 | -0.07014 | 1        |
| NFX1    | 0.212057 | 0.606181 | 0.507864 |
| CSTF3   | 0.051278 | 0.306967 | 0.265139 |
| TSPAN31 | 0.1865   | 1.055787 | 0.479026 |
| TIAM1   | 0.107511 | -1.19276 | 0.372977 |
| ECH1    | 0.286754 | -0.03177 | 0.590053 |
| MLLT11  | 0.15526  | 0.31804  | 0.444958 |
| ARHGAP5 | 0.494757 | 0.047673 | 0.741997 |
| PLA2R1  | 0.06058  | 0.434916 | 0.287134 |
| MALL    |          | 0        |          |
| PRDM2   | 0.334741 | 0.390165 | 0.621773 |
| STRN3   | 0.005543 | 0.466348 | 0.087699 |
| CDC16   | 0.002185 | 0.680794 | 0.049962 |
| STK4    | 0.041202 | 0.441823 | 0.240826 |
| FLII    | 0.97632  | -0.01834 | 0.998921 |
| TRIM32  | 0.279358 | 0.162853 | 0.58196  |
| COASY   | 0.434427 | 0.037756 | 0.698194 |
| NAIP    | 0.059403 | 0.94617  | 0.285461 |
| TRAF1   | 0.10601  | 0.766625 | 0.370631 |
| MRPL28  | 0.360948 | 0.224819 | 0.644411 |
| ACACA   | 0.623137 | -0.21302 | 0.825978 |
| PDIA2   | 0.464202 | 0.186337 | 0.721065 |
| PLA2G7  | 0.983209 | 0.046427 | 1        |
| LCP2    | 0.003514 | 0.651418 | 0.067901 |
| GPS1    | 0.419078 | 0.101663 | 0.688796 |
| IFT88   | 0.711652 | -0.24603 | 0.870161 |
| SPP2    | 0.909075 | 0.315727 | 0.97416  |
| ZBTB17  | 0.799868 | 0.077258 | 0.916176 |

|          |          |          |          |
|----------|----------|----------|----------|
| USP4     | 0.266378 | 0.319692 | 0.568807 |
| CHAF1A   | 0.005005 | 1.19167  | 0.082994 |
| CHAF1B   | 0.581366 | 0.335896 | 0.797998 |
| PDZK1IP1 | 0.304249 | 0.65417  | 0.606083 |
| TRAF3    | 0.002505 | 1.274747 | 0.055018 |
| IK       | 0.466082 | 0.175921 | 0.721065 |
| MTAP     | 0.660922 | -0.01477 | 0.844596 |
| RLF      | 0.302901 | 0.46843  | 0.604766 |
| PRKAA1   | 0.218632 | 0.203387 | 0.515816 |
| PPFIA1   | 0.030755 | 0.447011 | 0.211475 |
| CALCOCO2 | 0.35405  | -0.26232 | 0.638094 |
| EIF2B5   | 0.71923  | 0.070938 | 0.874478 |
| TARDBP   | 0.211314 | 0.21601  | 0.506632 |
| HNRNPA0  | 0.017103 | 0.473379 | 0.157941 |
| PAK1     | 0.61848  | -0.08704 | 0.822194 |
| AIMP2    | 0.845718 | -0.03306 | 0.942239 |
| FADD     | 0.249723 | -0.59386 | 0.552833 |
| PRDX4    | 0.277896 | 0.176772 | 0.579677 |
| MAP2K5   | 0.684849 | 0.282396 | 0.85709  |
| MAPK7    | 0.005132 | 1.950666 | 0.083955 |
| PAK2     | 0.020781 | 0.262017 | 0.172048 |
| SLC13A2  | 0.538865 | -0.42031 | 0.774868 |
| CBX3     | 0.680152 | -0.08035 | 0.85545  |
| STK3     | 0.086954 | 0.144827 | 0.337854 |
| STX5     | 0.003027 | 0.572137 | 0.062294 |
| CBLB     | 0.298466 | 0.469679 | 0.601676 |
| PSMD2    | 0.171096 | 0.169085 | 0.461822 |
| MMRN1    | 0.892045 | -0.04698 | 0.966699 |
| DDX10    | 0.636441 | 0.419981 | 0.833511 |
| TBX2     | 0.685434 | 0.12092  | 0.857546 |
| SEMA3B   | 0.820989 | -0.19142 | 0.927911 |
| DNAJC3   | 0.317645 | 0.126457 | 0.613139 |
| PAPPA    | 0.167136 | 0.652808 | 0.457139 |
| GPS2     | 0.38638  | 0.979834 | 0.665219 |
| SELENBP1 | 0.014008 | -0.86169 | 0.144006 |
| CHIT1    | 0.121951 | 1.274683 | 0.397343 |
| NME3     | 0.944783 | -0.03178 | 0.988547 |
| MAP3K1   | 0.739224 | -0.27627 | 0.886253 |
| PRKG2    | 0.464202 | -0.24963 | 0.721065 |
| SRSF9    | 0.197211 | 0.252013 | 0.490309 |
| SRSF5    | 0.327323 | 0.448585 | 0.617719 |
| SRSF6    | 0.876815 | 0.014309 | 0.958859 |
| NOG      | 0.810389 | -0.05112 | 0.921889 |
| MAD2L1   | 0.088792 | 1.299956 | 0.34076  |
| TRIM28   | 0.000125 | 0.503637 | 0.007549 |
| DHRS2    | 0.48063  | 0.290183 | 0.73294  |
| SEMA3F   | 0.845899 | -0.0064  | 0.942239 |
| STX3     | 0.460039 | -0.56628 | 0.717621 |
| G3BP1    | 0.000641 | 0.515312 | 0.023555 |
| CLN3     | 0.693088 | -0.89556 | 0.861478 |
| NMI      | 0.277896 | 0.218444 | 0.579677 |
| SLAMF1   | 0.36378  | 0.517764 | 0.646996 |
| KCNAB2   | 0.064284 | 0.403434 | 0.296208 |
| PTK7     | 0.000373 | 0.712506 | 0.01681  |
| SKP2     | 0.731297 | 0.063822 | 0.881419 |
| PABPC4   | 0.016204 | 0.302221 | 0.154611 |
| ATM      | 0.089414 | 0.344305 | 0.341477 |
| GRB10    | 0.032157 | 1.321803 | 0.215938 |

|         |          |          |          |
|---------|----------|----------|----------|
| IFIT5   | 0.357491 | 0.115073 | 0.641472 |
| SGCG    | 0.46384  | -0.56867 | 0.721065 |
| MTA1    | 0.071226 | 0.589015 | 0.311134 |
| PTPRS   | 0.123028 | 0.719603 | 0.399387 |
| SLC14A1 | 0.329349 | -0.27813 | 0.619341 |
| SP140   | 0.357155 | 0.466774 | 0.641472 |
| EIF3I   | 0.112657 | 0.148532 | 0.382523 |
| PPIL2   | 0.026439 | 0.936771 | 0.195939 |
| MFAP5   | 0.611514 | -0.13453 | 0.818417 |
| PPP2R5C | 0.03228  | 0.474828 | 0.215938 |
| CTBP1   | 0.400346 | 0.130948 | 0.67622  |
| AP3B2   | 0.455572 | 0.137884 | 0.71417  |
| PDE3B   | 0.132292 | 0.486408 | 0.414476 |
| PDCL    | 0.274443 | 0.81156  | 0.577625 |
| PLD1    | 0.322989 | 0.491151 | 0.613929 |
| TARBP1  | 0.162467 | 0.710942 | 0.453012 |
| MYO7A   | 0.429641 | -0.40888 | 0.695651 |
| UBE2V1  | 0.631426 | 0.073808 | 0.830965 |
| MRPL49  | 0.641914 | 0.2848   | 0.835764 |
| DYNC1I2 | 0.794443 | -0.0569  | 0.913708 |
| ORC1    | 0.063318 | 0.676511 | 0.294055 |
| ORC2    | 0.072566 | 0.73961  | 0.31451  |
| ILK     | 0.017726 | 0.259712 | 0.161012 |
| MSLN    | 0.896422 | -0.05959 | 0.969793 |
| IKZF1   | 0.264136 | 0.741669 | 0.566641 |
| NNT     | 0.882017 | 0.037603 | 0.961515 |
| SNTA1   | 0.702734 | -0.28937 | 0.866291 |
| SNTB2   | 0.986843 | 0.0785   | 1        |
| XRCC4   | 0.007031 | 1.608402 | 0.100623 |
| PPIG    | 0.340521 | 0.141848 | 0.627258 |
| TCOF1   | 0.343873 | 0.256926 | 0.630156 |
| UNC119  | 0.049522 | 1.109291 | 0.261364 |
| SLC39A6 | 0.311853 | 0.647182 | 0.610732 |
| SF3B2   | 0.112657 | 0.29308  | 0.382523 |
| OS9     | 0.012079 | 0.471424 | 0.133041 |
| GOLGA4  | 0.586319 | 0.221208 | 0.801141 |
| PDAP1   | 0.360948 | 0.336343 | 0.644411 |
| ADAM9   | 0.020065 | 0.558084 | 0.169555 |
| ADAM15  | 0.96052  | -0.23945 | 0.994122 |
| TMED1   | 0.145824 | 0.144639 | 0.434185 |
| LSAMP   | 0.426641 | -0.20861 | 0.693599 |
| FKBP5   | 0.308157 | 0.314971 | 0.609277 |
| TUSC3   | 0.199247 | 0.872716 | 0.49217  |
| MYO9B   | 0.001243 | 0.508299 | 0.034693 |
| ROCK1   | 0.244338 | 0.116865 | 0.547425 |
| FZD5    | 0.556057 | 0.087645 | 0.783439 |
| NFATC2  | 0.734076 | 0.085386 | 0.882858 |
| TNK1    | 0.660792 | -0.29045 | 0.844596 |
| TOP3A   | 0.086582 | 0.890109 | 0.337307 |
| IL18R1  | 0.21693  | 0.943026 | 0.513767 |
| GAB1    | 0.020787 | 1.317794 | 0.172048 |
| SMAD4   | 0.044583 | 0.335796 | 0.24851  |
| TCIRG1  | 0.511623 | -0.07651 | 0.754376 |
| BIRC2   | 0.248978 | 0.659499 | 0.552533 |
| GPM6B   | 0.092612 | -0.66851 | 0.347013 |
| PICALM  | 0.002718 | 0.384745 | 0.058088 |
| MTM1    | 0.233812 | -0.18554 | 0.535403 |
| SQSTM1  | 0.749036 | 0.023972 | 0.890902 |

|          |          |          |          |
|----------|----------|----------|----------|
| MED21    | 0.333172 | 0.253024 | 0.620731 |
| MTX1     | 0.892438 | -0.00619 | 0.966699 |
| NAB1     | 0.012976 | 0.9666   | 0.139171 |
| TUBB3    | 0.017103 | 1.190778 | 0.157941 |
| ASAH1    | 0.411524 | -0.06917 | 0.683152 |
| PRPF4B   | 0.157109 | 0.281746 | 0.447022 |
| PIN1     | 0.177368 | 0.194695 | 0.468602 |
| SERINC3  | 0.001587 | 2.070642 | 0.041122 |
| ATR      | 0.797297 | 0.157031 | 0.915298 |
| EIF4EBP1 | 0.316406 | 1.208571 | 0.613139 |
| EIF4EBP2 | 0.612103 | 0.428259 | 0.81882  |
| RIPK1    | 0.000596 | 0.557265 | 0.022651 |
| HDAC1    | 0.114161 | 0.262908 | 0.385201 |
| CAMK2B   | 0.713329 | -0.03889 | 0.87141  |
| CAMK2G   | 0.064284 | -0.24274 | 0.296208 |
| CAMK2D   | 0.098469 | -0.24687 | 0.357719 |
| DCTN2    | 0.426712 | 0.085924 | 0.693599 |
| PKD2     | 0.000471 | 2.211844 | 0.019767 |
| NAE1     | 0.103963 | 0.321535 | 0.366863 |
| IRF5     | 0.502215 | 0.75275  | 0.747559 |
| TDG      | 1        | -0.04544 | 1        |
| LAPTM5   | 0.172995 | 0.336174 | 0.464476 |
| ITPK1    | 0.933906 | 0.029482 | 0.984157 |
| SNW1     | 0.327323 | 0.202895 | 0.617719 |
| DGKZ     | 0.170417 | 0.704255 | 0.461822 |
| IQGAP2   | 0.632496 | -0.21011 | 0.830965 |
| STIM1    | 0.490639 | 0.12115  | 0.738656 |
| GRAP     | 0.312248 | -0.62596 | 0.610732 |
| SEMA5A   | 0.768139 | 0.071717 | 0.901915 |
| TRA2A    | 0.934288 | -0.06941 | 0.984157 |
| SNX1     | 0.2958   | 0.116471 | 0.598344 |
| KRR1     | 0.543955 | 0.244972 | 0.777449 |
| PEX6     | 0.773827 | -0.07593 | 0.903913 |
| DNASE1L3 | 0.702525 | 0.10622  | 0.866226 |
| PWP1     | 0.024286 | 0.730093 | 0.188496 |
| MTMR1    | 0.850885 | 0.044831 | 0.944945 |
| MTMR2    | 0.005891 | 1.432601 | 0.089865 |
| MTMR3    | 0.265899 | 0.798372 | 0.568807 |
| CUL1     | 0.407778 | 0.279149 | 0.680612 |
| CUL2     | 0.729121 | 0.072188 | 0.879656 |
| CUL3     | 0.840557 | 0.081045 | 0.939212 |
| CUL4A    | 0.053686 | 0.538128 | 0.271145 |
| CUL4B    | 0.09193  | 0.313069 | 0.345626 |
| TP53BP2  | 0.290359 | 0.613126 | 0.594164 |
| DYRK1A   | 0.618268 | -0.00415 | 0.822194 |
| TSTA3    | 0.44615  | -0.25592 | 0.706795 |
| RAB31    | 3.02E-05 | 0.779728 | 0.002309 |
| RAB32    | 0.151386 | 0.203101 | 0.44125  |
| TPBG     | 0.000815 | 0.8      | 0.027022 |
| FHL1     | 0.572777 | -0.26763 | 0.794481 |
| FHL3     | 5.81E-05 | 1.041088 | 0.004106 |
| PMS2P11  | 0.881708 | 0.122487 | 0.961515 |
| RIN1     | 0.019168 | 1.21811  | 0.166914 |
| ITGA7    | 0.828732 | 0.112391 | 0.933615 |
| AAMP     | 0.188098 | 0.359275 | 0.480067 |
| ALKBH1   | 0.077382 | 0.714544 | 0.324641 |
| MOGS     | 0.038035 | 0.256021 | 0.233324 |
| ALCAM    | 0.142204 | -0.37983 | 0.428816 |

|         |          |          |          |
|---------|----------|----------|----------|
| LAMB3   | 0.634844 | 0.232606 | 0.833063 |
| LAMC2   | 0.466057 | 0.221092 | 0.721065 |
| RUNX3   | 0.005739 | 1.359911 | 0.089283 |
| THOC5   | 0.600007 | 0.086447 | 0.810262 |
| NCOA4   | 0.028425 | 1.031573 | 0.20366  |
| APOF    | 0.437322 | 0.404751 | 0.70193  |
| ARFRP1  | 0.030755 | 0.433657 | 0.211475 |
| SHROOM2 | 0.860544 | -0.05014 | 0.950165 |
| ITGA9   | 0.599325 | -0.23022 | 0.810262 |
| SPTAN1  | 0.311298 | -0.10956 | 0.609894 |
| ENPP2   | 0.045989 | 1.010224 | 0.252361 |
| GNL2    | 0.025994 | 0.892522 | 0.193808 |
| AUH     | 0.466082 | -0.25649 | 0.721065 |
| PKP1    | 0.129517 | 0.825428 | 0.410218 |
| DDX39B  | 0.056188 | 0.249083 | 0.276683 |
| BLMH    | 0.009812 | 0.50124  | 0.119724 |
| EXOSC2  | 0.779221 | 0.083218 | 0.906856 |
| BMPR2   | 0.450332 | 0.111052 | 0.709868 |
| PTK6    | 0.084914 | -0.86417 | 0.335537 |
| SNTB1   | 0.236413 | -0.25364 | 0.537858 |
| TUBB2A  | 0.003297 | 0.498474 | 0.065524 |
| KLF5    | 0.912516 | 0.11652  | 0.975706 |
| GTF2H2  | 0.092612 | 0.437235 | 0.347013 |
| GTF2H3  | 0.07686  | 1.254881 | 0.323634 |
| BYSL    | 0.913333 | -0.16675 | 0.975706 |
| RAPGEF1 | 0.030941 | 0.991903 | 0.212485 |
| IDI1    | 0.887214 | 0.126449 | 0.96416  |
| CAPS    | 0.665395 | 0.360835 | 0.847351 |
| CUX1    | 0.171095 | 0.494976 | 0.461822 |
| RUNX2   | 0.000358 | 2.44163  | 0.016336 |
| CBFB    | 0.004611 | 0.448976 | 0.078316 |
| NFYC    | 0.533062 | 0.424186 | 0.7709   |
| PRKG1   | 0.02267  | 0.681714 | 0.180886 |
| CEACAM7 | 0.144841 | -0.59801 | 0.43345  |
| CDK13   | 0.332231 | 0.185777 | 0.620025 |
| IL16    | 0.474191 | 0.176023 | 0.727018 |
| CKAP5   | 0.018368 | 0.319835 | 0.163766 |
| CIRBP   | 0.019371 | 0.43916  | 0.167192 |
| CAMK1   | 0.036226 | 0.61482  | 0.227448 |
| COTL1   | 0.244338 | -0.30354 | 0.547425 |
| COL4A6  | 0.043407 | 1.165996 | 0.247142 |
| COL9A3  | 0.594656 | -0.11651 | 0.806337 |
| COL9A2  | 0.052298 | 0.904968 | 0.26804  |
| COX17   | 0.114157 | -0.20883 | 0.385201 |
| HNRNPD  | 0.804634 | 0.015207 | 0.918848 |
| TOB2    | 0.739737 | 0.084106 | 0.886374 |
| SCARB2  | 0.094502 | 0.329398 | 0.349959 |
| NID2    | 0.105374 | 0.230242 | 0.369374 |
| LRP8    | 0.22416  | 0.72244  | 0.522852 |
| IL18    | 0.430547 | -0.72357 | 0.695651 |
| DPYS    | 0.683728 | -0.06197 | 0.85709  |
| DAG1    | 0.61848  | -0.07482 | 0.822194 |
| VEZF1   | 0.263262 | -0.55172 | 0.565873 |
| PDE1C   | 0.3604   | 0.374728 | 0.644411 |
| DSG2    | 0.71923  | 0.291796 | 0.874478 |
| TRIM29  | 0.889918 | 0.212182 | 0.96614  |
| VGLL4   | 0.74294  | 0.138129 | 0.888303 |
| BOP1    | 0.216173 | 0.261897 | 0.512741 |



|         |          |          |          |
|---------|----------|----------|----------|
| UBE4A   | 0.126762 | 0.220019 | 0.403998 |
| SEPTIN6 | 0.426712 | 0.129495 | 0.693599 |
| TRIM14  | 0.743984 | 0.091416 | 0.888303 |
| KEAP1   | 0.46508  | 0.113926 | 0.721065 |
| URB2    | 0.009372 | 1.201893 | 0.117212 |
| DHX34   | 0.002203 | 1.167713 | 0.05007  |
| MORC3   | 0.039909 | 0.660505 | 0.23845  |
| SAFB2   | 0.38573  | 0.196726 | 0.664306 |
| EIF3A   | 0.595428 | 0.045506 | 0.806337 |
| ARHGEF7 | 0.754042 | 0.179942 | 0.894351 |
| EFR3A   | 0.001749 | 0.603145 | 0.043787 |
| UBAP2L  | 0.000289 | 0.659714 | 0.013838 |
| SCRIB   | 0.070198 | -0.37155 | 0.309184 |
| GIT2    | 0.000897 | 0.476385 | 0.028766 |
| SCARF1  | 0.979027 | 0.004767 | 1        |
| IKBKE   | 0.074021 | 0.921927 | 0.31759  |
| MLEC    | 0.123514 | 0.243947 | 0.399387 |
| TTLL12  | 0.311298 | 0.262846 | 0.609894 |
| MPP2    | 0.679383 | 0.033579 | 0.85545  |
| POLA2   | 0.065603 | 0.898808 | 0.299507 |
| DOCK1   | 0.001133 | 0.929878 | 0.032731 |
| TFDP1   | 0.164306 | 0.867494 | 0.454094 |
| TFDP2   | 0.78809  | 0.04812  | 0.911483 |
| WRN     | 0.400167 | 0.393902 | 0.67622  |
| FHL2    | 2.13E-07 | 1.305512 | 4.54E-05 |
| CRMP1   | 0.26988  | 0.679973 | 0.572322 |
| DPYSL3  | 9.32E-08 | 1.004953 | 2.25E-05 |
| ICT1    | 0.78936  | -0.09038 | 0.911483 |
| ZMYM3   | 0.378388 | 0.431258 | 0.659304 |
| DCTN1   | 0.913333 | 0.000829 | 0.975706 |
| DYNC1H1 | 0.157109 | 0.11868  | 0.447022 |
| LY6D    | 0.99433  | -0.08418 | 1        |
| EBI3    | 0.101663 | -1.2787  | 0.363022 |
| EIF2B1  | 0.360948 | 0.19417  | 0.644411 |
| EIF4A2  | 0.052873 | 0.221492 | 0.269122 |
| TCEB3   | 0.247715 | -0.55551 | 0.550914 |
| SELPLG  | 0.992523 | 0.042222 | 1        |
| MAP7    | 0.808226 | -0.17688 | 0.921586 |
| CTTN    | 0.167008 | 0.326389 | 0.457139 |
| ENDOG   | 0.481654 | 0.468139 | 0.733586 |
| FLOT2   | 0.286754 | -0.12866 | 0.590053 |
| RCN2    | 0.049723 | 0.467724 | 0.261364 |
| TRIM25  | 0.003823 | 0.284091 | 0.070612 |
| ERV3-1  | 0.421971 | -0.37447 | 0.691467 |
| PTK2B   | 0.78936  | -0.06395 | 0.911483 |
| FASTK   | 0.226845 | 0.561726 | 0.526348 |
| FGL2    | 0.474167 | -0.2906  | 0.727018 |
| FLNC    | 0.001527 | 1.082296 | 0.040048 |
| FKBP8   | 0.955289 | -0.03004 | 0.993074 |
| FAM50A  | 0.01453  | 0.388414 | 0.147184 |
| FRG1    | 0.866382 | 0.109647 | 0.953042 |
| GNA13   | 0.101186 | 0.205266 | 0.361901 |
| GAMT    | 0.241242 | 0.576101 | 0.544139 |
| GALE    | 0.123514 | -0.37137 | 0.399387 |
| LRRC32  | 0.019364 | 1.504829 | 0.167192 |
| GAS6    | 0.004819 | 1.497433 | 0.08122  |
| GCKR    | 0.08528  | -0.38071 | 0.335537 |
| GK2     | 0.48463  | 0.450909 | 0.735121 |

|          |          |          |          |
|----------|----------|----------|----------|
| PDE3A    | 0.075935 | 0.889702 | 0.321214 |
| GALNT3   | 0.208909 | 0.629464 | 0.503054 |
| PIGH     | 0.925522 | -0.08655 | 0.981917 |
| CAPRIN1  | 0.001956 | 0.471783 | 0.04685  |
| GRB14    | 0.74806  | -0.25682 | 0.890902 |
| GRB7     | 0.753596 | -0.15507 | 0.894351 |
| BECN1    | 0.382122 | 0.020303 | 0.661698 |
| HES1     | 0.382833 | 0.483788 | 0.662478 |
| SLBP     | 0.438086 | 0.343153 | 0.701933 |
| RBM39    | 0.007049 | 0.39215  | 0.100623 |
| WFDC2    | 0.696924 | 0.843189 | 0.863255 |
| NEDD9    | 0.450001 | -0.33044 | 0.709598 |
| FGFBP1   | 0.067371 | 0.856714 | 0.302148 |
| SPARCL1  | 0.910717 | 0.003087 | 0.975636 |
| FAT1     | 5.76E-06 | 2.012722 | 0.000627 |
| HABP2    | 0.554951 | -0.10702 | 0.783439 |
| KRT33B   | 0.81914  | -0.10141 | 0.92687  |
| HIC1     | 0.204074 | 0.522335 | 0.497963 |
| HLTF     | 0.170955 | 0.384814 | 0.461822 |
| KRT81    | 0.556057 | 0.080983 | 0.783439 |
| SQLE     | 0.377949 | 0.461558 | 0.659304 |
| HNF4G    | 0.300882 | 0.305125 | 0.602797 |
| SLC29A2  | 0.992139 | 0.006772 | 1        |
| PDIA5    | 0.004424 | 0.408579 | 0.076312 |
| PRPSAP1  | 0.360948 | -0.14047 | 0.644411 |
| DHX8     | 0.09193  | 0.366361 | 0.345626 |
| SEMA3A   | 0.366436 | 0.224042 | 0.649119 |
| MCM6     | 0.013241 | 1.668503 | 0.141015 |
| ITPR2    | 0.902877 | -0.09231 | 0.971583 |
| ITPR3    | 0.032856 | -0.37781 | 0.217297 |
| DSC3     | 0.565824 | 0.236663 | 0.79107  |
| ZNF460   | 0.182896 | 0.370657 | 0.474175 |
| NBR1     | 0.636492 | 0.142992 | 0.833511 |
| ITIH4    | 0.656149 | 0.323753 | 0.84209  |
| INPP5A   | 0.846775 | 0.131279 | 0.943024 |
| ITPR1    | 0.613839 | -0.12472 | 0.819264 |
| RASA3    | 0.001149 | 1.660449 | 0.033016 |
| PLS1     | 0.67051  | -0.04447 | 0.850681 |
| IRF3     | 0.5116   | 0.335539 | 0.754376 |
| KCNJ11   | 0.181133 | -0.34622 | 0.472575 |
| LAGE3    | 0.689778 | 0.474758 | 0.859429 |
| KIAA0100 | 0.364315 | -0.29553 | 0.646996 |
| TRIP12   | 0.019032 | 0.394276 | 0.166597 |
| PUM1     | 0.072266 | 0.475397 | 0.313701 |
| MDC1     | 0.047046 | 0.607636 | 0.255529 |
| CLINT1   | 0.774166 | -0.06452 | 0.903913 |
| KANK1    | 0.113653 | 0.810257 | 0.384893 |
| MELK     | 0.048504 | 0.732157 | 0.258731 |
| KCTD2    | 0.954108 | 0.047223 | 0.993074 |
| SMC1A    | 0.554955 | 0.089633 | 0.783439 |
| RRP1B    | 0.000547 | 1.279013 | 0.02168  |
| NCOA6    | 0.484375 | 0.322022 | 0.735121 |
| GSE1     | 0.529416 | 0.331762 | 0.768066 |
| DIP2A    | 0.456042 | 0.347221 | 0.714622 |
| PDCD11   | 0.897655 | -0.02993 | 0.969793 |
| GIN51    | 0.229479 | 0.491444 | 0.529537 |
| BMS1     | 0.081042 | 0.601835 | 0.328405 |
| LPIN1    | 0.239679 | 0.391661 | 0.542335 |

|          |          |          |          |
|----------|----------|----------|----------|
| USP10    | 0.005772 | 0.525741 | 0.089283 |
| MESDC2   | 0.09193  | 0.240325 | 0.345626 |
| GANAB    | 0.34052  | 0.094822 | 0.627258 |
| RFTN1    | 0.840557 | 0.017806 | 0.939212 |
| MBTPS1   | 0.176252 | 0.598067 | 0.468218 |
| SSPN     | 0.084371 | 1.296515 | 0.335025 |
| KCNAB1   | 0.106965 | -0.76726 | 0.371691 |
| MFSD10   | 0.699592 | -0.00553 | 0.864146 |
| PPP2R5D  | 0.011419 | 0.395017 | 0.128971 |
| LBR      | 0.108241 | 0.343628 | 0.374055 |
| COG2     | 0.392997 | 0.290951 | 0.671013 |
| GNMT     | 0.186982 | -0.43521 | 0.479162 |
| PTPRCAP  | 0.530115 | -0.27635 | 0.768664 |
| MVP      | 0.613839 | 0.00813  | 0.819264 |
| STAT4    | 0.423391 | -0.33404 | 0.691988 |
| LTBP1    | 4.78E-06 | 1.130035 | 0.000541 |
| LTBP2    | 0.314461 | 0.344332 | 0.612305 |
| ICAM4    | 0.163438 | -0.24877 | 0.453012 |
| CBX2     | 0.25797  | 0.439255 | 0.560462 |
| GOLGB1   | 0.085745 | 0.221502 | 0.335537 |
| CASP8    | 0.309724 | 0.322305 | 0.609864 |
| NAA30    | 0.082821 | 1.234932 | 0.332815 |
| FXD3     | 0.107566 | -1.2877  | 0.373049 |
| KIF22    | 0.106695 | 0.869894 | 0.371671 |
| MEF2D    | 0.158724 | 0.322907 | 0.449897 |
| CHD4     | 0.023466 | 0.318108 | 0.184845 |
| LASP1    | 0.04896  | 0.322368 | 0.259694 |
| STARD3   | 0.298114 | 0.312733 | 0.601676 |
| ARID5B   | 0.163894 | 0.564655 | 0.453304 |
| CRYM     | 0.11931  | -0.86843 | 0.393595 |
| PTGR1    | 0.575023 | 0.176912 | 0.796599 |
| DRAP1    | 0.030249 | 0.528949 | 0.209418 |
| NFATC4   | 0.003295 | 1.482332 | 0.065524 |
| NFIX     | 0.709323 | 0.557543 | 0.869179 |
| GPNMB    | 0.173168 | 0.409312 | 0.464476 |
| RAB39A   | 0.933998 | 0.106826 | 0.984157 |
| ZNF638   | 0.181644 | 0.407333 | 0.472575 |
| KPNB1    | 0.013012 | 0.255152 | 0.139171 |
| NOLC1    | 0.779219 | 0.331923 | 0.906856 |
| NUMA1    | 0.490639 | 0.121389 | 0.738656 |
| PSME4    | 0.22065  | 0.680137 | 0.519031 |
| CUL7     | 0.003732 | 1.103574 | 0.070138 |
| SLMAP    | 0.082198 | 0.282296 | 0.330671 |
| GAPVD1   | 0.239034 | 0.129856 | 0.541047 |
| CLCA4    | 0.045488 | -0.45753 | 0.250872 |
| KRT72    | 0.625883 | -0.38038 | 0.828579 |
| UBXN2B   | 0.775018 | 0.140659 | 0.904436 |
| NAA25    | 0.00511  | 0.808356 | 0.083708 |
| FASTKD3  | 0.177218 | 0.685628 | 0.468602 |
| VEPH1    | 0.079685 | -0.31525 | 0.325919 |
| NCAPH    | 0.220081 | 0.699006 | 0.518019 |
| KIAA0101 | 0.516723 | 0.269251 | 0.758769 |
| SPCS2    | 0.123514 | 0.194593 | 0.399387 |
| EMC2     | 0.407778 | 0.15422  | 0.680612 |
| WTAP     | 0.241676 | 0.227814 | 0.544139 |
| PSMD6    | 0.422885 | 0.14051  | 0.691467 |
| HERPUD1  | 0.965781 | 0.056664 | 0.99616  |
| LAPTM4A  | 0.35943  | -0.69584 | 0.64422  |

|          |          |          |          |
|----------|----------|----------|----------|
| MAD2L1BP | 0.234209 | 0.490946 | 0.535922 |
| MORF4L2  | 0.328142 | 0.624682 | 0.618843 |
| FAM175B  | 0.520135 | -0.22672 | 0.760272 |
| SEPTIN2  | 0.003589 | 0.304241 | 0.068752 |
| SART3    | 0.131757 | 0.163493 | 0.413476 |
| NCAPD2   | 0.134471 | 0.941096 | 0.417765 |
| SUZ12    | 0.185921 | 0.384681 | 0.478129 |
| EXOSC7   | 0.35064  | 0.171813 | 0.635657 |
| TNIP1    | 0.134781 | 0.786786 | 0.417833 |
| ACAP1    | 0.604602 | -0.31574 | 0.813002 |
| EFTUD2   | 0.012773 | 0.264037 | 0.137944 |
| LARS2    | 0.563832 | 0.185516 | 0.789479 |
| R3HDM1   | 0.807504 | -0.12572 | 0.921159 |
| TRAM2    | 0.000786 | 2.290194 | 0.026652 |
| SNX17    | 0.010997 | 0.476696 | 0.127049 |
| DAZAP2   | 0.310183 | 0.38194  | 0.609864 |
| ARL6IP1  | 0.724167 | -0.32294 | 0.876654 |
| RAB3GAP1 | 0.016204 | 0.302929 | 0.154611 |
| SLC39A14 | 0.000132 | 1.637828 | 0.007794 |
| KARS     | 0.272095 | 0.108312 | 0.575039 |
| SETDB1   | 0.066575 | 1.071912 | 0.30175  |
| LRRC14   | 0.707192 | -0.15985 | 0.869179 |
| RRS1     | 0.014934 | 0.550603 | 0.150049 |
| IQCB1    | 0.066923 | 0.74044  | 0.302058 |
| ARHGEF6  | 0.009087 | 0.399334 | 0.115713 |
| KIAA0040 | 0.568504 | 0.384925 | 0.791838 |
| POLD3    | 0.031117 | 1.227482 | 0.212999 |
| EIF4H    | 0.008248 | 0.436649 | 0.109165 |
| ACAP2    | 0.064284 | 0.540231 | 0.296208 |
| KIF14    | 0.599931 | 0.226432 | 0.810262 |
| BRD3     | 0.00891  | 1.271762 | 0.114289 |
| WDR43    | 0.764084 | 0.146101 | 0.899242 |
| POSTN    | 8.62E-06 | 1.064864 | 0.00087  |
| ACOX1    | 0.035078 | 0.425354 | 0.223337 |
| OXA1L    | 0.144006 | 0.273744 | 0.431666 |
| ZNF146   | 0.332529 | 0.419609 | 0.620367 |
| EEA1     | 0.017412 | 0.263443 | 0.159467 |
| NCF4     | 0.036828 | 0.463579 | 0.229759 |
| PDIA6    | 0.147661 | 0.185913 | 0.436386 |
| PAFAH1B3 | 0.689846 | 0.058927 | 0.859429 |
| AGER     | 0.215142 | -1.16049 | 0.511491 |
| PLCL1    | 0.22538  | 0.751536 | 0.52468  |
| PCOLCE   | 2.27E-08 | 1.917835 | 7.40E-06 |
| PDK1     | 0.269225 | 0.190284 | 0.571371 |
| PDK2     | 0.986843 | 0.045658 | 1        |
| PDK3     | 0.568296 | 0.118045 | 0.791838 |
| PEA15    | 0.018368 | 0.4162   | 0.163766 |
| PGM5     | 0.97632  | 0.091874 | 0.998921 |
| EBP      | 0.008089 | 0.688482 | 0.107782 |
| PMVK     | 0.764084 | -0.13339 | 0.899242 |
| PRKD1    | 0.003104 | 1.588517 | 0.063161 |
| PLCB4    | 0.43012  | -0.25504 | 0.695651 |
| PLEC     | 0.003297 | 0.331121 | 0.065524 |
| PCM1     | 0.292764 | 0.649393 | 0.595788 |
| NOMO1    | 0.180562 | 0.740895 | 0.472575 |
| PON2     | 0.308157 | 0.076745 | 0.609277 |
| PON3     | 0.085642 | -0.92302 | 0.335537 |
| TCEAL1   | 0.643739 | 0.293514 | 0.837208 |

|          |          |          |          |
|----------|----------|----------|----------|
| PPP2R5A  | 0.462056 | -0.16701 | 0.718747 |
| PPP2R5B  | 0.028929 | 1.164148 | 0.205808 |
| PPA1     | 0.327323 | -0.16919 | 0.617719 |
| PTGES3   | 0.609213 | 0.007008 | 0.816529 |
| PDGFRL   | 1.93E-06 | 3.250979 | 0.000255 |
| STK38    | 0.016799 | 0.441075 | 0.156698 |
| PVRL1    | 0.080348 | 1.078004 | 0.327024 |
| NONO     | 0.09982  | 0.227571 | 0.359216 |
| PPP2R4   | 0.892438 | 0.080873 | 0.966699 |
| PTPRK    | 0.965786 | 0.262038 | 0.99616  |
| PWP2     | 0.097132 | 0.284286 | 0.354489 |
| QPRT     | 0.87156  | 0.09473  | 0.956098 |
| RABEP1   | 0.016499 | 0.36371  | 0.155558 |
| RASA2    | 0.006253 | 1.225973 | 0.093377 |
| RAB35    | 0.149515 | 0.213358 | 0.438811 |
| RNPS1    | 0.289748 | 0.231301 | 0.593134 |
| RBBP5    | 0.14042  | 0.188887 | 0.426568 |
| RCN1     | 0.000412 | 0.550469 | 0.018066 |
| IRF4     | 0.492983 | 0.521657 | 0.741084 |
| RALBP1   | 0.66395  | -0.23842 | 0.847289 |
| KRT31    | 0.331588 | -0.1188  | 0.619341 |
| ZMYND11  | 0.410055 | -0.18909 | 0.682809 |
| LLGL1    | 0.010783 | 0.910064 | 0.126291 |
| LRRC41   | 0.354009 | 0.713765 | 0.638094 |
| TMED2    | 0.197211 | 0.129261 | 0.490309 |
| PCBP1    | 0.419078 | 0.119843 | 0.688796 |
| PCBP2    | 0.019715 | 0.222126 | 0.1684   |
| TCEB1    | 0.729121 | 0.049963 | 0.879656 |
| TCEB2    | 0.882017 | 0.005806 | 0.961515 |
| RHEB     | 0.632496 | 0.169608 | 0.830965 |
| UBE3C    | 0.105374 | 0.381851 | 0.369374 |
| TOMM20   | 0.684533 | 0.499788 | 0.85709  |
| ANGPT1   | 0.08528  | -0.37833 | 0.335537 |
| MTFR1    | 0.142952 | 1.070188 | 0.430602 |
| DHCR24   | 0.651386 | -0.19887 | 0.839222 |
| SF3B3    | 0.038035 | 0.25582  | 0.233324 |
| KIAA0020 | 0.665709 | 0.10244  | 0.847351 |
| DLGAP5   | 0.391202 | 0.318794 | 0.669777 |
| TLR1     | 0.053552 | 0.877149 | 0.271145 |
| RSU1     | 0.011206 | 0.341155 | 0.128397 |
| CNN3     | 6.23E-08 | 1.212325 | 1.73E-05 |
| RPS6KA1  | 0.185996 | -0.21122 | 0.478129 |
| SAFB     | 0.0799   | 0.51558  | 0.325919 |
| SF3B4    | 0.097132 | 0.38389  | 0.354489 |
| SF3A2    | 0.317645 | 0.195021 | 0.613139 |
| RBMS2    | 0.306214 | 0.933179 | 0.607661 |
| PPP1R7   | 0.374984 | 0.140725 | 0.656862 |
| SEC23A   | 2.92E-07 | 0.73322  | 6.00E-05 |
| SEC23B   | 0.586319 | 0.056053 | 0.801141 |
| CYTH1    | 0.049522 | 0.826983 | 0.261364 |
| SF3A1    | 0.147661 | 0.236427 | 0.436386 |
| SHB      | 0.6534   | -0.44754 | 0.841387 |
| SIX1     | 0.233926 | 0.633332 | 0.535496 |
| SKIV2L   | 0.126762 | 0.175321 | 0.403998 |
| FCN2     | 0.323227 | 0.462846 | 0.614276 |
| RGN      | 0.103362 | -1.23907 | 0.366609 |
| SPA17    | 0.638802 | 0.107785 | 0.834211 |
| CDSN     | 0.15526  | 0.310916 | 0.444958 |

|          |          |          |          |
|----------|----------|----------|----------|
| SURF1    | 0.694709 | 0.198806 | 0.861478 |
| SURF2    | 0.770646 | 0.09831  | 0.903323 |
| MED22    | 0.393093 | 1.273527 | 0.671013 |
| SS18     | 0.618129 | -0.30644 | 0.822194 |
| TAF5     | 0.58156  | 0.059238 | 0.797998 |
| TAF13    | 0.756203 | 0.163561 | 0.896333 |
| TAF7     | 0.001028 | 1.302847 | 0.031079 |
| TERF2    | 0.680143 | 0.058203 | 0.85545  |
| MAPRE2   | 0.001956 | 0.720243 | 0.04685  |
| TGFB1    | 0.014008 | 0.421477 | 0.144006 |
| TGIF1    | 0.832496 | 0.058202 | 0.93551  |
| NCOA2    | 0.169335 | 0.795705 | 0.460317 |
| SLC9A3R2 | 0.012079 | -0.44066 | 0.133041 |
| TRADD    | 0.211314 | 0.283797 | 0.506632 |
| TRAM1    | 0.013502 | 0.545707 | 0.141812 |
| TSN      | 0.171096 | 0.281323 | 0.461822 |
| TARBP2   | 0.374429 | 0.50821  | 0.656862 |
| SF1      | 0.031269 | 0.327814 | 0.212999 |
| TRIP10   | 0.025131 | 0.416047 | 0.191949 |
| TRIP11   | 0.057044 | 0.349934 | 0.278658 |
| TRIP13   | 0.04378  | 1.891232 | 0.247494 |
| OASL     | 0.412816 | 0.570792 | 0.684488 |
| MED1     | 0.121792 | 0.570249 | 0.397343 |
| TRIP4    | 0.03024  | 0.677008 | 0.209418 |
| HMGH3    | 0.024484 | -0.97706 | 0.189451 |
| JMJD1C   | 0.134779 | 0.36517  | 0.417833 |
| NFKB1B   | 0.80434  | 0.461326 | 0.918848 |
| TRIP6    | 0.208914 | 0.359107 | 0.503054 |
| RHOH     | 0.730466 | 0.14022  | 0.880704 |
| PTPN14   | 0.000346 | 1.789628 | 0.015914 |
| MAPRE1   | 0.011856 | 0.317335 | 0.13136  |
| DLG2     | 0.012927 | 0.990599 | 0.139171 |
| TSC22D1  | 0.201062 | -1.37637 | 0.494343 |
| ELAVL1   | 0.199513 | 0.204051 | 0.49217  |
| LTB4R    | 0.467682 | -0.48874 | 0.722799 |
| ELF2     | 0.074697 | 1.054326 | 0.318513 |
| NSDHL    | 0.093209 | 0.313166 | 0.347256 |
| NAB2     | 0.010828 | 1.747462 | 0.126436 |
| MYLK     | 0.008575 | 0.589331 | 0.111496 |
| TAB1     | 0.0412   | 0.776239 | 0.240826 |
| HERC1    | 0.589244 | 0.107032 | 0.804544 |
| SLC1A5   | 0.028293 | 0.539549 | 0.203235 |
| MAPK11   | 0.322009 | 0.126439 | 0.613139 |
| CD226    | 0.825553 | -0.06947 | 0.930793 |
| RAB30    | 0.335138 | 0.543053 | 0.622407 |
| MLF2     | 0.863663 | 0.312125 | 0.951892 |
| ZKSCAN8  | 0.80943  | 0.144796 | 0.921586 |
| CHI3L2   | 0.705459 | 0.151112 | 0.868107 |
| TOMM34   | 0.286748 | 0.571261 | 0.590053 |
| NCOA1    | 0.789238 | 0.229506 | 0.911483 |
| SMAD2    | 0.173102 | 0.543531 | 0.464476 |
| SMAD1    | 0.338275 | 0.618355 | 0.625538 |
| MSMO1    | 0.253708 | 0.585345 | 0.557407 |
| ITSN1    | 0.00116  | 0.647054 | 0.033154 |
| TBCE     | 0.28378  | 0.412964 | 0.586874 |
| TBCC     | 0.6657   | -0.1289  | 0.847351 |
| NPTX1    | 0.672064 | 0.162932 | 0.851286 |
| UBE2V2   | 0.709387 | -0.02039 | 0.869179 |

|         |          |          |          |
|---------|----------|----------|----------|
| CST6    | 0.078408 | 1.183537 | 0.32578  |
| STK11   | 0.079988 | 0.819418 | 0.326155 |
| STXBP2  | 0.764084 | -0.02193 | 0.899242 |
| CCDC85B | 0.473815 | 0.300942 | 0.727018 |
| VAMP3   | 0.289748 | -0.05368 | 0.593134 |
| KCNJ8   | 0.250555 | -0.42331 | 0.554113 |
| NEDD8   | 0.992106 | -0.52349 | 1        |
| ADIRF   | 0.195965 | -0.85781 | 0.490309 |
| ADIPOQ  | 0.487515 | 0.025984 | 0.737456 |
| SLC14A2 | 0.988991 | 0.181759 | 1        |
| USF2    | 0.596298 | 0.604521 | 0.807219 |
| ATP6AP1 | 0.613839 | -0.06531 | 0.819264 |
| VPS72   | 0.696683 | 0.534435 | 0.863213 |
| RAB11B  | 0.280828 | 0.33726  | 0.583434 |
| EZH2    | 0.029414 | 1.279252 | 0.207259 |
| ZFHX3   | 0.029315 | 0.622854 | 0.207066 |
| ZYX     | 0.000582 | 0.506432 | 0.022491 |
| HSPB2   | 0.594656 | -0.08537 | 0.806337 |
| ETFDH   | 0.077655 | -0.30828 | 0.324641 |
| SEPTIN7 | 0.135171 | 0.158792 | 0.417833 |
| ADRM1   | 0.78936  | -0.07493 | 0.911483 |
| CCDC6   | 0.123514 | 0.285037 | 0.399387 |
| UAP1    | 0.27785  | 0.573639 | 0.579677 |
| E2F4    | 0.035301 | 1.206815 | 0.224243 |
| IGFBP7  | 0.004905 | 0.521918 | 0.082133 |
| NTRK3   | 0.594656 | 0.118003 | 0.806337 |
| PDCD2   | 0.571251 | 0.288276 | 0.793891 |
| SLC15A2 | 0.734512 | -0.17456 | 0.883278 |
| INA     | 0.996024 | -0.16121 | 1        |
| LAMA4   | 0.051278 | 0.258661 | 0.265139 |
| PRR4    | 0.331588 | -0.21479 | 0.619341 |
| EXT1    | 0.020432 | 1.227558 | 0.170514 |
| PSMD5   | 0.426712 | 0.123786 | 0.693599 |
| TNXA    |          | 0        |          |
| PKN1    | 0.292764 | 0.091693 | 0.595788 |
| PKN2    | 0.1068   | 0.344559 | 0.371671 |
| CSRP2   | 1.00E-06 | 1.109621 | 0.00015  |
| DDB1    | 0.169043 | 0.161675 | 0.459676 |
| SNAPC1  | 0.49063  | -0.23197 | 0.738656 |
| PPP2R5E | 0.749036 | 0.005552 | 0.890902 |
| MAPK14  | 0.002718 | 0.437064 | 0.058088 |
| MRPL23  | 0.892354 | 0.071116 | 0.966699 |
| CDC37   | 0.086954 | 0.226497 | 0.337854 |
| LY6E    | 0.322009 | 0.161878 | 0.613139 |
| DPYSL2  | 0.347246 | -0.08195 | 0.632606 |
| SNRNP35 | 0.650206 | -0.27212 | 0.839222 |
| SYPL1   | 0.689846 | -0.12526 | 0.859429 |
| CAMK4   | 0.594588 | 0.157381 | 0.806337 |
| ACKR1   | 0.983606 | -0.04223 | 1        |
| RBBP7   | 0.068179 | 0.276621 | 0.303928 |
| C3AR1   | 0.217791 | 0.643224 | 0.515367 |
| MAP3K11 | 0.067267 | 0.937989 | 0.302148 |
| SGCB    | 0.055152 | 1.564505 | 0.274516 |
| SGCA    | 0.988991 | 0.006372 | 1        |
| TAF9    | 0.840203 | 0.000337 | 0.939212 |
| FXN     | 0.327296 | 0.222025 | 0.617719 |
| CALCRL  | 0.312942 | -0.65488 | 0.611063 |
| ECM1    | 6.74E-06 | 1.727822 | 0.000698 |

|          |          |          |          |
|----------|----------|----------|----------|
| BAK1     | 0.177356 | 0.407228 | 0.468602 |
| CTF1     | 0.573625 | -0.37099 | 0.795459 |
| NTRK2    | 0.960709 | 0.085145 | 0.994122 |
| OCLN     | 0.246948 | -0.17609 | 0.549922 |
| MEA1     | 0.371998 | 0.873497 | 0.654894 |
| CCL14    | 0.280329 | -0.59933 | 0.583434 |
| SRSF7    | 0.305036 | 0.257646 | 0.606083 |
| CPSF6    | 0.020421 | 0.29084  | 0.170514 |
| TAZ      | 0.046145 | 1.041629 | 0.252614 |
| SMN1     | 0.479996 | 0.864277 | 0.732402 |
| DBN1     | 5.27E-07 | 0.824363 | 8.85E-05 |
| MAPKAPK3 | 0.965767 | 0.00093  | 0.99616  |
| PTGIS    | 0.009087 | 0.447311 | 0.115713 |
| NFIL3    | 0.358581 | 0.200863 | 0.642907 |
| PRSS8    | 0.500737 | 0.459671 | 0.746432 |
| PDK4     | 0.559081 | -0.07692 | 0.78633  |
| NRF1     | 0.494603 | -0.08096 | 0.741997 |
| FSCN1    | 0.000236 | 0.737154 | 0.011882 |
| HIF1A    | 0.576048 | 0.265432 | 0.796634 |
| IFI16    | 0.466082 | 0.178194 | 0.721065 |
| ZSCAN26  | 0.38676  | 0.303424 | 0.665564 |
| CYP1B1   | 0.003086 | 1.505837 | 0.063034 |
| CYP2A13  | 0.738907 | 0.017138 | 0.886253 |
| DECR1    | 0.950035 | -0.0032  | 0.990863 |
| MAN2A1   | 0.007049 | 0.52303  | 0.100623 |
| NDUFA5   | 0.45805  | -0.06157 | 0.715224 |
| KYNU     | 0.088177 | 0.609342 | 0.339301 |
| UGCG     | 0.200321 | 0.771755 | 0.493506 |
| CLPP     | 0.641914 | -0.0696  | 0.835764 |
| TST      | 0.298858 | -0.23012 | 0.601676 |
| UBE2S    | 0.771591 | 0.171687 | 0.903336 |
| QPCT     | 0.057714 | 1.735578 | 0.280499 |
| CCBL1    | 0.962592 | 0.118804 | 0.995441 |
| GUK1     | 0.759058 | -0.01961 | 0.896847 |
| HAGH     | 0.14042  | -0.23188 | 0.426568 |
| LAMA3    | 0.128409 | -0.96739 | 0.407846 |
| CA9      | 0.048774 | 1.755719 | 0.259694 |
| NDUFA9   | 0.084549 | 0.232024 | 0.335025 |
| ME3      | 0.194925 | 0.40816  | 0.488911 |
| RTN1     | 0.090037 | 0.509079 | 0.343044 |
| PCK2     | 0.699592 | -0.09037 | 0.864146 |
| PTPN21   | 0.306985 | 0.253546 | 0.608756 |
| PTPRO    | 0.361047 | 0.400661 | 0.644411 |
| DUSP6    | 0.321952 | 0.35488  | 0.613139 |
| UPP1     | 0.009087 | 1.116811 | 0.115713 |
| DDR2     | 0.009681 | 1.157338 | 0.119174 |
| HADH     | 0.068179 | -0.37556 | 0.303928 |
| ST3GAL2  | 0.083546 | 0.577277 | 0.333074 |
| CYP51A1  | 0.524434 | -0.32182 | 0.764023 |
| UGP2     | 0.739057 | 0.04939  | 0.886253 |
| AOC3     | 0.05791  | -0.635   | 0.280499 |
| DGUOK    | 0.858539 | 0.231459 | 0.949134 |
| ATP6V1F  | 0.939534 | 0.016137 | 0.986498 |
| LTC4S    | 0.955385 | 0.113774 | 0.993081 |
| PFKFB3   | 0.891321 | -0.14667 | 0.966699 |
| PFKFB4   | 0.854285 | -0.05537 | 0.946993 |
| UGT8     | 0.040652 | 1.178295 | 0.240594 |
| TXNRD1   | 0.434427 | 0.12295  | 0.698194 |



|          |          |          |          |
|----------|----------|----------|----------|
| TPD52L1  | 0.164343 | -0.89855 | 0.454094 |
| IMMT     | 0.442223 | -0.05009 | 0.703704 |
| TATDN3   | 0.97519  | -0.03076 | 0.998921 |
| ARHGAP44 | 0.723639 | -0.26456 | 0.876654 |
| EXOC3L4  | 0.304735 | 0.788497 | 0.606083 |
| FAM98C   | 0.418612 | -0.55038 | 0.688796 |
| CPEB4    | 0.071157 | 1.015102 | 0.311134 |
| ECSCR    | 0.733732 | -0.09998 | 0.882858 |
| KNOP1    | 0.844318 | 0.10426  | 0.942239 |
| DUOXA1   | 0.657906 | -0.16673 | 0.842898 |
| HNRNPUL2 | 0.02152  | 0.212153 | 0.175496 |
| TMEM132A | 0.093069 | 0.752873 | 0.347256 |
| INF2     | 0.018368 | 0.400564 | 0.163766 |
| HLA-C    | 0.268408 | -1.18648 | 0.571056 |
| HLA-B    | 0.387241 | 1.009235 | 0.666184 |
| HLA-C    | 1        | -0.16937 | 1        |
| HLA-C    | 0.404471 | 0.780413 | 0.678667 |
| HLA-DRB1 | 0.616148 | -0.38842 | 0.821456 |
| PDS5A    | 0.486499 | -0.02823 | 0.73612  |
| KIAA0753 | 0.839125 | 0.032384 | 0.939212 |
| QSER1    | 0.218373 | 0.402825 | 0.515816 |
| CLEC16A  | 0.016733 | 0.843845 | 0.156698 |
| KIF26B   | 0.362628 | 0.059129 | 0.646401 |
| KIAA1109 | 0.598512 | 0.23266  | 0.809425 |
| ARHGAP31 | 0.065004 | -0.87623 | 0.298136 |
| MTHFSD   | 0.322596 | 0.572497 | 0.613498 |
| FAM83E   | 0.716495 | 0.217466 | 0.873394 |
| AAK1     | 0.003589 | 0.491967 | 0.068752 |
| C17orf58 | 0.782496 | -0.00574 | 0.909237 |
| MPEG1    | 0.200985 | 0.769147 | 0.494264 |
| KIAA1033 | 0.004905 | 0.320838 | 0.082133 |
| EXOC3L2  | 0.951201 | -0.14388 | 0.991986 |
| SHROOM1  | 0.331766 | 0.698434 | 0.619465 |
| SLC5A9   | 0.08528  | -0.36082 | 0.335537 |
| TCTN1    | 0.291769 | 0.239139 | 0.595183 |
| ERCC6L   | 0.740249 | 0.175951 | 0.886428 |
| TSR1     | 0.004564 | 0.628908 | 0.078202 |
| VMAC     | 0.834608 | 0.28828  | 0.935999 |
| RALGAPA2 | 0.618479 | -0.36003 | 0.822194 |
| DPY19L1  | 0.001562 | 0.699761 | 0.040678 |
| TRIM71   | 0.068041 | 0.573789 | 0.303928 |
| MPV17L   | 0.705459 | 0.130111 | 0.868107 |
| TYSND1   | 0.26284  | 0.789239 | 0.565873 |
| IAH1     | 0.520146 | 0.2292   | 0.760272 |
| ALG11    | 0.005543 | 0.466645 | 0.087699 |
| CCDC57   | 0.693787 | 0.218801 | 0.861478 |
| MUM1     | 0.11247  | 0.444933 | 0.382523 |
| QRICH1   | 0.071225 | 0.726187 | 0.311134 |
| TUSC1    | 0.709925 | -0.05024 | 0.869646 |
| GOLGA7B  | 0.391124 | -0.51896 | 0.669747 |
| SMU1     | 0.138653 | 0.160604 | 0.424105 |
| ATG2A    | 0.707192 | -0.01096 | 0.869179 |
| ZNF800   | 0.146234 | 1.122924 | 0.43517  |
| HKDC1    | 0.048022 | 1.30961  | 0.257798 |
| CWF19L2  | 0.14108  | 0.841165 | 0.427981 |
| COL28A1  | 0.594994 | 0.826271 | 0.806337 |
| AP5B1    | 0.177172 | 0.518151 | 0.468602 |
| CTU2     | 0.123453 | 1.032639 | 0.399387 |

|          |          |          |          |
|----------|----------|----------|----------|
| UVSSA    | 1        | -0.02227 | 1        |
| HLA-DRB1 | 0.073289 | 1.941886 | 0.31592  |
| HLA-DRB5 | 0.625215 | 0.398488 | 0.828169 |
| HLA-DRB1 | 0.57907  | -0.15369 | 0.796675 |
| HFE      | 0.467955 | 0.415607 | 0.722799 |
| BTBD16   | 0.536524 | 0.072517 | 0.773175 |
| ATHL1    | 0.093803 | 0.924975 | 0.349072 |
| LRRFIP1  | 0.289748 | -0.10845 | 0.593134 |
| PGS1     | 0.162867 | 0.717308 | 0.453012 |
| LEPRE1   | 1.37E-09 | 1.220731 | 1.33E-06 |
| TRMT5    | 0.372956 | 0.431712 | 0.656059 |
| EML3     | 0.646644 | 0.124071 | 0.837353 |
| NDUFAF6  | 0.438589 | -0.47886 | 0.701933 |
| LRRK1    | 0.25441  | 0.411163 | 0.557593 |
| TWISTNB  | 0.655061 | 0.267584 | 0.84209  |
| GFOD2    | 0.676778 | 0.234944 | 0.854135 |
| EDRF1    | 0.168756 | 0.330728 | 0.459676 |
| MAP7D1   | 0.000515 | 0.966118 | 0.020674 |
| UAP1L1   | 0.054507 | 0.806322 | 0.273313 |
| SLC25A35 | 0.748956 | 0.172941 | 0.890902 |
| GRAMD1B  | 0.49063  | 0.132082 | 0.738656 |
| C2orf76  | 0.397868 | 0.573128 | 0.675323 |
| CHD9     | 0.485693 | 0.108302 | 0.736106 |
| DAK      | 0.133456 | -0.32256 | 0.416228 |
| LSM12    | 0.217619 | 0.502722 | 0.515069 |
| TBC1D25  | 0.267643 | -0.39959 | 0.570195 |
| RGL3     | 0.671419 | 0.126275 | 0.851247 |
| ITPRIPL2 | 0.471546 | 0.452199 | 0.726047 |
| TMEM30B  | 0.609091 | -0.49108 | 0.816529 |
| PUS10    | 0.546635 | 0.314626 | 0.778971 |
| ADCK5    | 0.822953 | 0.071226 | 0.929468 |
| HSDL1    | 0.378519 | 0.488408 | 0.659304 |
| ARL13B   | 0.09909  | 0.403848 | 0.358568 |
| SLC25A52 | 0.393788 | -0.32286 | 0.6712   |
| SP6      | 0.672064 | 0.182503 | 0.851286 |
| ALDH1L2  | 1.60E-06 | 1.387155 | 0.000219 |
| BBS9     | 0.886026 | -0.1287  | 0.96416  |
| GON4L    | 0.097657 | 0.635667 | 0.356252 |
| GNPTAB   | 0.350349 | 0.155173 | 0.635657 |
| CCDC88A  | 0.025994 | 0.95773  | 0.193808 |
| TMEM176B | 0.216062 | 0.767914 | 0.512741 |
| TBRG1    | 0.750874 | 0.003512 | 0.892598 |
| RABL6    | 0.162993 | 0.073144 | 0.453012 |
| VMA21    | 0.3169   | -0.21863 | 0.613139 |
| TUBB8    | 0.236413 | 0.239742 | 0.537858 |
| FAM174B  | 0.724835 | 0.219283 | 0.877157 |
| TIMM50   | 0.28378  | 0.202294 | 0.586874 |
| LGALS1   | 0.016813 | -1.24638 | 0.156698 |
| PARP14   | 0.001493 | 0.704526 | 0.039523 |
| PLEKHN1  | 0.651513 | 0.083174 | 0.839222 |
| TIGIT    | 0.079293 | 0.349062 | 0.32578  |
| FUT11    | 0.009338 | 1.368453 | 0.117105 |
| SLFNL1   | 0.322009 | 0.122962 | 0.613139 |
| GLYR1    | 0.632496 | 0.056814 | 0.830965 |
| ZBED5    | 0.643047 | 0.15819  | 0.836406 |
| CRY2     | 0.009676 | -0.66312 | 0.119174 |
| C5orf22  | 0.932434 | 0.07345  | 0.984157 |
| COX19    | 0.708911 | 0.840901 | 0.869179 |

|          |          |          |          |
|----------|----------|----------|----------|
| MAP9     | 0.378108 | -0.79174 | 0.659304 |
| C2CD3    | 0.204074 | -0.65389 | 0.497963 |
| RIC1     | 0.002077 | 1.123031 | 0.048395 |
| GTDC1    | 0.165468 | -0.7249  | 0.455554 |
| FAM188B  | 0.163085 | -0.41826 | 0.453012 |
| VPS26B   | 0.236413 | 0.060676 | 0.537858 |
| CCSMST1  | 0.601657 | -0.49895 | 0.811699 |
| LARP7    | 0.360948 | -0.09194 | 0.644411 |
| NADK2    | 0.014531 | 0.369064 | 0.147184 |
| KCTD21   | 0.135945 | 0.587187 | 0.419757 |
| CCDC40   | 0.786868 | 0.140718 | 0.911452 |
| GXYLT1   | 0.304291 | 0.646792 | 0.606083 |
| ACSF3    | 0.161013 | -0.28665 | 0.453012 |
| PREPL    | 0.131582 | 0.536137 | 0.413476 |
| TBC1D10B | 0.083367 | 0.339311 | 0.332962 |
| TPRN     | 0.632433 | -0.20687 | 0.830965 |
| ANO6     | 0.083367 | 0.435935 | 0.332962 |
| PLCH1    | 0.97632  | -0.13983 | 0.998921 |
| FILIP1L  | 6.32E-06 | 1.477925 | 0.000675 |
| AASDH    | 0.244375 | -0.30666 | 0.547425 |
| SVEP1    | 0.238688 | 0.525891 | 0.541047 |
| DNAL1    | 0.655968 | -0.30269 | 0.84209  |
| ARID4B   | 0.031337 | 1.154328 | 0.212999 |
| MRPL51   | 0.351135 | 0.869216 | 0.636243 |
| GRIPAP1  | 0.882017 | 0.132654 | 0.961515 |
| TMEM119  | 0.41336  | -0.26616 | 0.685053 |
| BCL7A    | 0.733732 | -0.05957 | 0.882858 |
| CCDC58   | 0.981581 | 0.024509 | 1        |
| FLYWCH1  | 0.23168  | -0.67684 | 0.532772 |
| AMOT     | 0.041014 | 0.882549 | 0.240826 |
| ATP13A4  | 0.060401 | -1.01964 | 0.287134 |
| SYTL3    | 0.158047 | -0.72165 | 0.448712 |
| GREB1    | 0.651513 | 0.029875 | 0.839222 |
| FNDC1    | 2.02E-06 | 3.090061 | 0.00026  |
| TMEM259  | 0.061847 | 1.308002 | 0.290811 |
| PAN2     | 0.016827 | 1.030704 | 0.156698 |
| RFTN2    | 0.359814 | 0.415001 | 0.644411 |
| FAM98B   | 0.714303 | 0.101039 | 0.87164  |
| EPC2     | 0.056667 | 0.633886 | 0.278217 |
| ARHGAP29 | 0.736544 | 0.194174 | 0.884985 |
| PDCD4    | 0.236413 | 0.12406  | 0.537858 |
| FNDC3B   | 9.75E-06 | 0.914541 | 0.000948 |
| CRTC2    | 0.391566 | 0.655744 | 0.670194 |
| AGPAT9   | 0.824577 | -0.10748 | 0.930395 |
| LRRC23   | 0.03481  | -0.56578 | 0.223337 |
| CEP55    | 0.073574 | 0.954084 | 0.316471 |
| C17orf85 | 0.177172 | 0.557197 | 0.468602 |
| MPPE1    | 0.282463 | 0.595989 | 0.58557  |
| TP53I3   | 0.071226 | 0.522198 | 0.311134 |
| TMEM35   | 0.065197 | 0.924733 | 0.298136 |
| C11orf73 | 0.394655 | 1.357442 | 0.672349 |
| ORMDL2   | 0.29269  | 0.250973 | 0.595788 |
| ACSM3    | 0.108294 | -1.065   | 0.374055 |
| IFI44L   | 0.964835 | 0.126457 | 0.99616  |
| PHLDA2   | 0.034841 | 1.518139 | 0.223337 |
| SLC44A4  | 0.570217 | -0.30204 | 0.793891 |
| PDLIM3   | 0.000382 | 0.782243 | 0.017029 |
| PLEKHO1  | 0.265857 | 0.826085 | 0.568807 |

|               |          |          |          |
|---------------|----------|----------|----------|
| PARP10        | 0.084549 | 0.500399 | 0.335025 |
| HSD17B12      | 0.064284 | 0.195528 | 0.296208 |
| GLE1          | 0.194928 | 0.191034 | 0.488911 |
| USP39         | 0.061485 | 0.333005 | 0.289565 |
| KLHL22        | 0.005769 | 1.558724 | 0.089283 |
| AGK           | 0.61848  | -0.075   | 0.822194 |
| SETMAR        | 0.975958 | 0.164821 | 0.998921 |
| PLA1A         | 0.472922 | -0.26764 | 0.727018 |
| LACTB2        | 0.997369 | 0.040162 | 1        |
| PYCR1         | 0.955289 | 0.026671 | 0.993074 |
| CCDC92        | 0.800635 | -0.43862 | 0.916865 |
| KLHL26        | 0.539401 | 0.278044 | 0.775135 |
| TSSC1         | 0.986843 | -0.03366 | 1        |
| CDCA8         | 0.182122 | 0.703523 | 0.473381 |
| SMUG1         | 0.628551 | -0.2526  | 0.829715 |
| SOWAHC        | 0.632688 | 0.041534 | 0.831021 |
| LBH           | 0.147247 | 1.600366 | 0.436386 |
| ARHGAP15      | 0.648815 | 0.380754 | 0.839222 |
| FASTKD1       | 0.327618 | 0.480782 | 0.618172 |
| FBLN7         | 0.943939 | -0.04305 | 0.988547 |
| ANKRD39       | 0.49213  | 0.238855 | 0.740198 |
| KRTCAP3       | 0.407991 | -0.86844 | 0.680763 |
| RAB6C         | 0.007479 | 0.467036 | 0.10395  |
| BOLA3         | 0.629138 | -0.56678 | 0.830094 |
| TMEM177       | 0.555173 | 0.570826 | 0.783439 |
| COBLL1        | 0.606822 | -0.34548 | 0.815541 |
| HS1BP3        | 0.009626 | 0.694119 | 0.118893 |
| CYBRD1        | 0.874215 | 0.091609 | 0.957716 |
| WDR81         | 0.223612 | 0.240281 | 0.521792 |
| ACTBL2        | 0.687409 | -0.34196 | 0.858864 |
| CCDC93        | 0.981581 | -0.00927 | 1        |
| MPV17L2       | 0.907445 | 0.086254 | 0.9734   |
| ZNF385B       | 0.644428 | -0.51156 | 0.837353 |
| EAPP          | 0.309615 | 0.58236  | 0.609864 |
| OCIAD2        | 0.524435 | 0.095166 | 0.764023 |
| SFT2D3        | 0.902728 | 0.628846 | 0.971583 |
| PAN3          | 0.087714 | 0.860849 | 0.339301 |
| NAALADL2      | 0.174719 | 0.74894  | 0.466796 |
| SDK2          | 0.983224 | -0.15928 | 1        |
| PLEKHG4       | 0.794727 | 0.027054 | 0.913708 |
| HSP90AB4P     | 0.102977 | 1.200421 | 0.365649 |
| HSP90AB2P     | 0.166674 | 0.429097 | 0.457139 |
| HSP90AA4P     | 0.407416 | 0.640046 | 0.680612 |
| DCAF6         | 0.976387 | -0.08212 | 0.998921 |
| RPL39P5;RPL39 | 0.107619 | 1.936649 | 0.373118 |
| TMEM41B       | 0.099811 | -0.58735 | 0.359216 |
| TMEM97        | 0.426727 | -0.90138 | 0.693599 |
| ODF2          | 0.263505 | 0.501984 | 0.565873 |
| TMEM128       | 0.975991 | -0.12229 | 0.998921 |
| YIF1B         | 0.079892 | 0.315204 | 0.325919 |
| ALG10         | 0.233837 | 0.898987 | 0.535403 |
| OXLD1         | 0.296597 | 0.825278 | 0.599275 |
| C19orf54      | 0.967597 | -0.0983  | 0.997177 |
| SLC45A4       | 0.476091 | 0.248812 | 0.728924 |
| FAM133B       | 0.08117  | 0.771966 | 0.328802 |
| ZNF326        | 0.11117  | 0.365031 | 0.380668 |
| TTMP          | 0.761889 | 0.097073 | 0.899044 |
| NOM1          | 0.509349 | 0.361588 | 0.753225 |

|              |          |          |          |
|--------------|----------|----------|----------|
| DALRD3       | 0.272407 | -0.8572  | 0.57559  |
| ZC3H12A      | 0.003449 | 1.323776 | 0.067458 |
| FLG2         | 0.043784 | 0.930924 | 0.247494 |
| MEST         | 0.057713 | 1.193435 | 0.280499 |
| RILPL1       | 0.000689 | 1.344826 | 0.024536 |
| PDZD11       | 0.143873 | 0.018639 | 0.431666 |
| CMPK2        | 0.963173 | 0.034409 | 0.995704 |
| CARD16       | 0.170198 | -1.22456 | 0.461644 |
| DNAJC21      | 0.16689  | 0.327307 | 0.457139 |
| ARSI         | 0.712043 | 0.164055 | 0.870223 |
| VWA2         | 0.401292 | -0.56828 | 0.67733  |
| TNFAIP8L3    | 0.853281 | 0.076458 | 0.946657 |
| HERC4        | 0.330589 | 0.431284 | 0.619341 |
| PIGG         | 0.554864 | 0.116609 | 0.783439 |
| FREM1        | 0.36378  | -0.18972 | 0.646996 |
| CT83         | 0.447034 | 0.351201 | 0.707261 |
| TFDP3        | 0.594656 | -0.07867 | 0.806337 |
| PPP6R3       | 0.024706 | 0.491921 | 0.190022 |
| DDX60L       | 0.409138 | 0.539239 | 0.682163 |
| TMEM67       | 0.442398 | -0.48364 | 0.703763 |
| MTX3         | 0.856037 | 0.700653 | 0.946993 |
| RABL3        | 0.162993 | -0.43054 | 0.453012 |
| FAM76B       | 0.354985 | 0.517116 | 0.639146 |
| COQ5         | 0.426712 | -0.13978 | 0.693599 |
| SH3D19       | 0.719142 | 0.280049 | 0.874478 |
| NHSL2        | 0.123417 | 0.923537 | 0.399387 |
| EMC4         | 0.590866 | 0.054839 | 0.804875 |
| NOMO2        | 0.002283 | 0.385714 | 0.051363 |
| EARS2        | 0.965801 | 0.000115 | 0.99616  |
| C3orf38      | 0.001082 | 0.711337 | 0.031645 |
| METTL10      | 0.957511 | 0.013846 | 0.994122 |
| TCTEX1D4     | 0.57907  | -0.13013 | 0.796675 |
| MIA3         | 0.340521 | 0.278835 | 0.627258 |
| PAGE2B;PAGE2 | 0.992139 | 0.023255 | 1        |
| PITRM1       | 0.145824 | -0.25756 | 0.434185 |
| NHLRC3       | 0.005654 | 1.19932  | 0.088608 |
| PSMG4        | 0.193918 | 1.116101 | 0.488275 |
| WDR44        | 0.046732 | 0.261201 | 0.254194 |
| DDX26B       | 0.319571 | -0.55778 | 0.613139 |
| DOCK11       | 0.023065 | 0.429218 | 0.182986 |
| FGD3         | 0.422095 | 0.307761 | 0.691467 |
| EFHC2        | 0.993518 | 0.072392 | 1        |
| PRRC2B       | 0.252497 | 0.512672 | 0.555643 |
| PLAC9        | 0.445128 | -0.16358 | 0.706795 |
| AMER1        | 0.730466 | 0.071018 | 0.880704 |
| TJAP1        | 0.334628 | 0.379271 | 0.62172  |
| RRP12        | 0.76912  | 0.10694  | 0.901915 |
| COA6         | 0.651389 | -0.1851  | 0.839222 |
| TOR1AIP1     | 0.759058 | 0.035904 | 0.896847 |
| CEP78        | 0.583581 | 0.228966 | 0.799765 |
| AARS2        | 0.929044 | 0.055431 | 0.983115 |
| TOR2A        | 0.520009 | 0.318299 | 0.760272 |
| IQSEC2       | 0.00023  | 1.845949 | 0.011713 |
| TEX30        | 0.168941 | 0.947426 | 0.459676 |
| PCID2        | 0.194928 | 0.476058 | 0.488911 |
| EFHC1        | 0.335614 | -0.24308 | 0.623082 |
| HABP4        | 0.012012 | 1.414993 | 0.132693 |
| DOPEY1       | 1        | -0.06145 | 1        |

|          |          |          |          |
|----------|----------|----------|----------|
| SLC27A3  | 0.415291 | -0.07275 | 0.686028 |
| SAMD9    | 0.181643 | 0.129766 | 0.472575 |
| COLEC12  | 0.364352 | 0.681556 | 0.646996 |
| SPECC1   | 2.13E-07 | 1.546339 | 4.54E-05 |
| RNFT1    | 0.066645 | 0.989281 | 0.301803 |
| SMEK2    | 0.177071 | 0.741077 | 0.468602 |
| WDR45B   | 0.120275 | 0.913019 | 0.39497  |
| WIP1     | 0.205395 | 0.905296 | 0.49957  |
| EOGT     | 0.002718 | 0.65483  | 0.058088 |
| SAMD4B   | 0.006502 | 0.582661 | 0.096023 |
| BRMS1L   | 0.575791 | 0.355974 | 0.796634 |
| CLEC12A  | 0.542041 | 0.140068 | 0.775521 |
| TBCEL    | 0.016793 | 0.677183 | 0.156698 |
| DNTTIP2  | 0.038957 | 0.836405 | 0.236232 |
| DCAF10   | 0.902044 | 0.092952 | 0.971583 |
| RABGAP1L | 0.001996 | 0.896523 | 0.047089 |
| TTC38    | 0.159047 | -0.08126 | 0.449897 |
| FAM26F   | 0.190221 | 0.938225 | 0.483515 |
| ERICH3   | 0.752244 | -0.33016 | 0.893365 |
| COX20    | 0.101186 | 0.646332 | 0.361901 |
| EXOSC6   | 0.81486  | 0.018355 | 0.924847 |
| LRRK2    | 0.003056 | -1.72145 | 0.06265  |
| PPM1L    | 0.541018 | 0.343494 | 0.775521 |
| TMEM201  | 0.364426 | 0.295439 | 0.646996 |
| C6orf136 | 0.484591 | 0.417245 | 0.735121 |
| ATAT1    | 0.212636 | -0.63515 | 0.508813 |
| SNAP47   | 0.023267 | 1.349021 | 0.18431  |
| HIATL1   | 0.144938 | 0.550026 | 0.433523 |
| NUP188   | 0.011419 | 0.372179 | 0.128971 |
| PHYHD1   | 0.98683  | -0.21124 | 1        |
| TTC39A   | 0.095326 | -0.8116  | 0.351834 |
| MANEA    | 0.943162 | 0.077555 | 0.988547 |
| MUC21    | 0.316309 | -0.5957  | 0.613139 |
| HP1BP3   | 0.774166 | -0.06292 | 0.903913 |
| SAPCD1   |          | 0        |          |
| VAR2     | 0.929044 | 0.031229 | 0.983115 |
| SLC25A30 | 0.185786 | -0.79377 | 0.478129 |
| ZMYM1    | 0.187689 | 0.65548  | 0.480067 |
| CEP170   | 0.001146 | 1.049224 | 0.033016 |
| LDLRAP1  | 0.172631 | 0.567979 | 0.464157 |
| TMEM69   | 0.079293 | 0.437863 | 0.32578  |
| C10orf55 | 0.331588 | -0.23751 | 0.619341 |
| ODR4     | 0.233812 | -0.20914 | 0.535403 |
| PLEKHS1  | 0.666764 | 0.348347 | 0.848351 |
| DNLZ     | 0.583888 | 0.741507 | 0.800019 |
| NOL9     | 0.030755 | 0.622399 | 0.211475 |
| NHSL1    | 0.359796 | 0.528221 | 0.644411 |
| FREM2    | 0.839022 | 0.296434 | 0.939212 |
| SZT2     | 0.182435 | 0.600905 | 0.473679 |
| HYI      | 0.117009 | -0.50868 | 0.389929 |
| ZNF362   | 0.021286 | 1.695242 | 0.174748 |
| TPRG1L   | 0.378257 | 0.13452  | 0.659304 |
| CC2D1B   | 0.324076 | -0.0722  | 0.614309 |
| FNBP1L   | 0.660922 | -0.0174  | 0.844596 |
| FAM83B   | 0.673559 | 0.22694  | 0.852854 |
| C6orf132 | 0.467659 | 0.44827  | 0.722799 |
| UBXN11   | 0.992139 | -0.00159 | 1        |
| RARS2    | 0.066695 | 0.588574 | 0.301803 |

|          |          |          |          |
|----------|----------|----------|----------|
| THEM4    | 0.981491 | 0.539024 | 1        |
| FKBP15   | 0.105374 | 0.16809  | 0.369374 |
| DDX59    | 0.897228 | 0.010241 | 0.969793 |
| ZC3H13   | 0.054622 | 1.001235 | 0.273507 |
| C9orf114 | 0.141764 | 1.190255 | 0.428816 |
| OTUD3    | 0.021806 | 0.552865 | 0.176756 |
| C10orf76 | 0.699592 | -0.16036 | 0.864146 |
| PDSS1    | 0.201482 | 0.536079 | 0.49489  |
| MPP7     | 0.0084   | -1.02769 | 0.110127 |
| TMEM63B  | 0.709387 | 0.258526 | 0.869179 |
| GPATCH4  | 0.010542 | 1.554292 | 0.124785 |
| LRIF1    | 0.032247 | 1.078167 | 0.215938 |
| ABCC10   | 0.400391 | 0.341106 | 0.67622  |
| IBA57    | 0.324076 | -0.20802 | 0.614309 |
| HECTD3   | 0.35064  | 0.191441 | 0.635657 |
| CERCAM   | 9.65E-07 | 3.129375 | 0.000149 |
| TMTC4    | 0.322566 | 0.369548 | 0.613498 |
| ZFYVE27  | 0.394968 | 0.37874  | 0.672485 |
| UBR4     | 0.779221 | 0.057369 | 0.906856 |
| C1orf194 | 0.571349 | 0.100268 | 0.793891 |
| STXBP5   | 0.694668 | 0.53248  | 0.861478 |
| KIAA1217 | 3.80E-05 | 1.142675 | 0.002829 |
| ARHGAP21 | 0.056787 | 0.939237 | 0.278658 |
| BEND3    | 0.188978 | 0.617356 | 0.481719 |
| CAMSAP1  | 0.181684 | 0.6255   | 0.472575 |
| GPR110   | 0.015982 | 0.850367 | 0.154257 |
| MRPL2    | 0.817404 | 0.452779 | 0.926863 |
| CFAP58   | 0.269746 | -0.24721 | 0.572146 |
| DCAF12   | 0.100118 | 0.760161 | 0.359821 |
| UBAP2    | 0.148922 | 0.98556  | 0.438811 |
| IDNK     | 0.741581 | -0.22663 | 0.887545 |
| C9orf64  | 0.311298 | 0.161249 | 0.609894 |
| FAM162B  | 0.251878 | -0.76407 | 0.555643 |
| LCE1F    | 0.322009 | 0.167766 | 0.613139 |
| FAM69A   | 0.559237 | 0.540772 | 0.78633  |
| KANK4    | 0.648707 | 0.128756 | 0.839222 |
| GORAB    | 0.042193 | 1.24248  | 0.243142 |
| ZNF618   | 0.011758 | 1.088081 | 0.130798 |
| TSTD2    | 0.57907  | -0.14652 | 0.796675 |
| ACBD5    | 0.382127 | 0.143388 | 0.661698 |
| FAM102B  | 0.131585 | 0.783551 | 0.413476 |
| RBM26    | 0.347246 | 0.375682 | 0.632606 |
| ATAD3B   | 0.177172 | 0.631616 | 0.468602 |
| FAM102A  | 0.123186 | 0.746025 | 0.399387 |
| PIP5KL1  | 0.163438 | -0.19929 | 0.453012 |
| WLS      | 0.001597 | 1.496579 | 0.041198 |
| CPSF3L   | 0.550481 | 0.125427 | 0.781327 |
| CPTP     | 0.833456 | 0.127327 | 0.935999 |
| TTC22    | 0.82732  | -0.05579 | 0.932311 |
| DCAF8    | 0.955289 | 0.122127 | 0.993074 |
| ZCCHC11  | 0.596675 | 0.228466 | 0.807535 |
| FRY      | 0.399203 | -0.21089 | 0.67622  |
| RNASEH2B | 0.855454 | 0.15049  | 0.946993 |
| BCL2L15  | 0.260848 | -0.83041 | 0.56373  |
| N4BP2L1  | 0.224995 | -0.36232 | 0.523918 |
| ATPAF1   | 0.18138  | 0.404906 | 0.472575 |
| GRTP1    | 0.019085 | 0.889025 | 0.166801 |
| RC3H1    | 0.078369 | 0.655411 | 0.32578  |

|                |          |          |                 |
|----------------|----------|----------|-----------------|
| OGFRL1         | 0.016661 | 1.469881 | 0.156336        |
| MAGI3          | 0.134693 | -0.8914  | 0.417833        |
| SH3PXD2A       | 0.013305 | 1.476133 | 0.141215        |
| RSPH4A         | 0.499616 | 0.103494 | 0.745391        |
| FHL5           | 0.437689 | -0.46931 | 0.701933        |
| DDI2           | 0.343873 | -0.22378 | 0.630156        |
| THEMIS2        | 0.192667 | 0.328646 | 0.486094        |
| NDUFAF5        | 0.88069  | -0.03731 | 0.961515        |
| SOGA3          | 0.481732 | -0.18787 | 0.733586        |
| NT5DC1         | 0.835403 | -0.09139 | 0.935999        |
| SIRPB1         | 0.677236 | 0.072937 | 0.854325        |
| PXDC1          | 0.454615 | 0.405362 | 0.713678        |
| TMCO4          | 0.767502 | 0.399663 | 0.901915        |
| AHDC1          | 0.009272 | 1.176308 | 0.116462        |
| MINOS1         | 0.33259  | -0.82906 | 0.620376        |
| ARFGEF3        | 0.028414 | -1.05421 | 0.20366         |
| VPS13D         | 0.97632  | -0.10349 | 0.998921        |
| LIN9           | 0.049077 | 0.829075 | 0.260189        |
| ZNF658;ZNF658B | 0.855035 | 0.338498 | 0.946993        |
| CROCC          | 0.61848  | -0.05115 | 0.822194        |
| TMEM164        | 0.234531 | -1.11207 | 0.536436        |
| ASPHD1         | 0.300882 | 0.251448 | 0.602797        |
| MEX3C          | 0.792859 | 0.012043 | 0.913708        |
| LYRM7          | 0.753963 | 0.046183 | 0.894351        |
| RASIP1         | 0.428621 | -0.10534 | 0.695651        |
| EMC10          | 0.613835 | 0.168748 | 0.819264        |
| PIK3R6         | 0.411887 | 0.247603 | 0.683152        |
| RIF1           | 0.192599 | 0.579622 | 0.486094        |
| VPS53          | 0.709387 | -0.05334 | 0.869179        |
| MANEAL         | 0.64003  | -0.10391 | 0.835224        |
| STRIP1         | 0.037428 | 0.179276 | 0.231646        |
| ABHD17B        | 0.036978 | 1.394976 | 0.230405        |
| CEP350         | 0.05761  | 0.701576 | 0.280499        |
| CDC42BPA       | 0.078771 | 0.534691 | 0.32578         |
| RPRD2          | 0.029257 | 0.521023 | 0.20681         |
|                | 1-Mar    | 0.149732 | -0.83076 0.4391 |
| ANXA8L2        | 0.74145  | 0.098129 | 0.887483        |
| RNF220         | 0.941333 | 0.098404 | 0.987918        |
| ANGEL2         | 0.146679 | 0.905442 | 0.435709        |
| KLHDC7A        | 0.028644 | -1.10986 | 0.204827        |
| PRPF38B        | 0.541768 | 0.433361 | 0.775521        |
| TTC39B         | 0.260456 | 0.71822  | 0.56373         |
| RNF20          | 0.041861 | 0.593608 | 0.242066        |
| HHAT           | 0.289626 | -0.58747 | 0.593134        |
| PDE4DIP        | 0.003987 | 0.774339 | 0.071551        |
| CACHD1         | 0.387622 | 0.571487 | 0.666378        |
| ZNF318         | 0.020604 | 1.057309 | 0.171558        |
| FAM171A1       | 0.137489 | -0.42808 | 0.422524        |
| C1orf53        | 0.342416 | -0.35073 | 0.629771        |
| LRCH2          | 0.979131 | -0.10295 | 1               |
| SDHAF4         | 0.634822 | -0.19117 | 0.833063        |
| OTUD1          | 0.291769 | 0.207955 | 0.595183        |
| ARHGEF16       | 0.196056 | -0.50943 | 0.490309        |
| CDKAL1         | 0.001925 | 1.198744 | 0.046514        |
| ZNF691         | 0.306947 | 0.545461 | 0.608756        |
| IRAK1BP1       | 0.080193 | -1.15776 | 0.326714        |
| YOD1           | 0.302328 | 0.487377 | 0.603839        |
| BROX           | 0.208914 | 0.150024 | 0.503054        |



|          |          |          |          |
|----------|----------|----------|----------|
| FOCAD    | 0.040224 | 0.635335 | 0.239722 |
| GPR107   | 0.183545 | 0.647026 | 0.474829 |
| TAF3     | 0.138736 | 0.432151 | 0.424242 |
| SNX30    | 0.22354  | -0.59744 | 0.521792 |
| FAM208B  | 0.549467 | 0.409337 | 0.781327 |
| FAM46C   | 0.01547  | 1.759736 | 0.152523 |
| RSBN1    | 0.034778 | 1.013645 | 0.223337 |
| DAB2IP   | 0.273538 | 0.406215 | 0.577625 |
| C1orf168 | 0.651568 | 0.322371 | 0.839222 |
| C1QL3    | 1        | -0.10078 | 1        |
| KHDRBS2  | 0.381798 | -0.46327 | 0.661698 |
| LYPLAL1  | 0.830256 | -0.01048 | 0.933615 |
| PEAR1    | 0.803503 | -0.14031 | 0.918848 |
| ECM29    | 0.088177 | 0.218279 | 0.339301 |
| ZCCHC6   | 0.834713 | -0.06185 | 0.935999 |
| SLX4IP   | 0.683128 | 0.108416 | 0.85709  |
| ANKRD22  | 0.47419  | 0.077633 | 0.727018 |
| SHE      | 0.645144 | -0.14468 | 0.837353 |
| DENND4C  | 0.32085  | 0.207801 | 0.613139 |
| NAA35    | 0.02891  | 1.35288  | 0.205806 |
| MBNL2    | 0.069467 | 1.300482 | 0.307321 |
| LRRC16A  | 0.126762 | -0.36463 | 0.403998 |
| ZMYM4    | 0.243966 | 0.752049 | 0.547425 |
| BSPRY    | 0.133518 | -0.9108  | 0.416228 |
| FAM160B1 | 0.277891 | 0.351757 | 0.579677 |
| ZDHHC20  | 0.666998 | 0.389146 | 0.848454 |
| SPRYD7   | 0.799529 | -0.12549 | 0.916173 |
| PAPD7    | 0.141292 | 0.397733 | 0.427981 |
| KRT79    | 0.298717 | 0.333685 | 0.601676 |
| FAM219B  | 0.49063  | 0.121194 | 0.738656 |
| QIL1     | 0.759058 | 0.083453 | 0.896847 |
| RNF123   | 0.388697 | -0.48486 | 0.667643 |
| FBXW9    | 0.836576 | -0.04383 | 0.937124 |
| ANO1     | 0.162979 | 0.730657 | 0.453012 |
| HLA-DRB1 | 0.992139 | 0.006433 | 1        |
| CD276    | 6.46E-08 | 1.442741 | 1.75E-05 |
| ALS2CL   | 0.576048 | 0.173906 | 0.796634 |
| AFMID    | 0.029398 | -1.4497  | 0.207259 |
| PLCXD3   | 0.716722 | -0.01345 | 0.873394 |
| RNF213   | 0.069183 | 0.363649 | 0.306571 |
| EGFLAM   | 0.281331 | 0.269195 | 0.583877 |
| TNS2     | 0.882016 | 0.261402 | 0.961515 |
| KANK2    | 0.317645 | 0.320833 | 0.613139 |
| FAM21A   | 0.031101 | 0.882205 | 0.212999 |
| METRNL   | 0.713547 | 0.246682 | 0.871581 |
| LPCAT4   | 0.541985 | 0.815934 | 0.775521 |
| FAM154B  | 0.238303 | -0.45704 | 0.540624 |
| STEAP3   | 0.871617 | -0.26099 | 0.956098 |
| FAM91A1  | 0.157109 | 0.176315 | 0.447022 |
| ICE2     | 0.954108 | -0.02983 | 0.993074 |
| LARP1B   | 0.556747 | 0.272378 | 0.784211 |
| CEP135   | 0.675185 | -0.30692 | 0.853175 |
| TBC1D9B  | 0.032856 | 0.346451 | 0.217297 |
| MAP1S    | 0.2958   | 0.062962 | 0.598344 |
| CPZ      | 1.97E-05 | 2.689657 | 0.001698 |
| E4F1     | 0.060469 | 0.622092 | 0.287134 |
| PPP2R2D  | 0.994671 | 0.275345 | 1        |
| ARL6IP4  | 0.002362 | 1.190468 | 0.052824 |

|                      |          |          |          |
|----------------------|----------|----------|----------|
| ATG16L1              | 0.731594 | -0.21925 | 0.881584 |
| RAP1GAP2             | 0.792343 | 0.105439 | 0.913596 |
| STEAP4               | 0.148574 | -0.72515 | 0.438051 |
| OLFML2A              | 0.481155 | 0.331524 | 0.733586 |
| OLFML2B              | 0.043608 | 1.032213 | 0.247494 |
| HGSNAT               | 0.013913 | 1.799967 | 0.144006 |
| ARID2                | 0.008219 | 1.210973 | 0.10891  |
| DIEXF                | 0.176827 | 0.435489 | 0.468602 |
| GLT8D1               | 0.005486 | 0.941654 | 0.087298 |
| SEL1L3               | 0.850881 | 0.050491 | 0.944945 |
| RPGRIP1L             | 0.298171 | 0.406895 | 0.601676 |
| TNS3                 | 0.000275 | 0.597406 | 0.013262 |
| HAUS3                | 0.008795 | 1.484014 | 0.11325  |
| SLFN13               | 0.030839 | 0.949496 | 0.211921 |
| SPTY2D1              | 0.636013 | 0.055825 | 0.833511 |
| MBLAC2               | 0.38928  | -0.17739 | 0.667643 |
| FMN1                 | 0.079555 | -0.92291 | 0.325919 |
| ANKS6                | 0.962445 | 0.038602 | 0.995382 |
| PLA2G4F              | 0.792046 | -0.38147 | 0.913596 |
| LMBRD2               | 0.482833 | 0.624033 | 0.733977 |
| ZFYVE26              | 0.135998 | 0.394984 | 0.419803 |
| MSL1                 | 0.025871 | 1.320401 | 0.193808 |
| C2orf16              | 0.831174 | -0.06758 | 0.934471 |
| CRYBG3               | 0.412682 | 0.373955 | 0.684368 |
| INTS3                | 0.000741 | 0.689024 | 0.025686 |
| ARHGAP17             | 0.014008 | 0.368108 | 0.144006 |
| SLC6A19              | 0.15526  | 0.274704 | 0.444958 |
| NCBP2-AS2            | 0.226242 | -1.22827 | 0.525276 |
| CWF19L1              | 0.097128 | 0.673496 | 0.354489 |
| KIAA1429             | 0.223612 | 0.427726 | 0.521792 |
| SPECC1L              | 0.025563 | 0.566846 | 0.193268 |
| C12orf73             | 0.616936 | -0.47879 | 0.822194 |
| C1orf95              | 1        | -0.05284 | 1        |
| HEATR6               | 0.027183 | 1.155229 | 0.199264 |
| ANKRD40              | 0.78305  | -0.18551 | 0.909506 |
| GLTSCR1L             | 0.071488 | 0.746268 | 0.312032 |
| WWC2                 | 0.081553 | 1.265655 | 0.329871 |
| SCARA3               | 0.058364 | 0.850663 | 0.281933 |
| TRIM68               | 0.939739 | 0.080357 | 0.986525 |
| HBM                  | 0.971656 | 0.095128 | 0.997592 |
| CYB5R2               | 0.068946 | 1.401973 | 0.306571 |
| REP15                | 0.484075 | -0.26303 | 0.735071 |
| UHRF1BP1             | 0.1793   | 0.603903 | 0.471072 |
| ZNF787               | 0.925827 | 0.040479 | 0.982053 |
| ATL3                 | 0.000815 | 0.357234 | 0.027022 |
| RPL7L1               | 0.400346 | 0.241027 | 0.67622  |
| LGALS9C;LGALS9B      | 0.657906 | -0.20377 | 0.842898 |
| NXN                  | 0.004955 | 0.789753 | 0.082765 |
| TTC19                | 0.57882  | -0.44604 | 0.796675 |
| MCTP2                | 0.547806 | 0.199777 | 0.779889 |
| IQSEC1               | 0.068176 | 0.586691 | 0.303928 |
| CDC42BPG             | 0.907988 | -0.19635 | 0.9734   |
| DMKN                 | 0.69426  | 0.065642 | 0.861478 |
| POLR2M               | 0.321952 | 0.479652 | 0.613139 |
| VASN                 | 0.003027 | 1.185005 | 0.062294 |
| RLTPR                | 0.132629 | 0.70252  | 0.415298 |
| SFRP4                | 2.08E-06 | 3.139875 | 0.000262 |
| HIST2H2AA3;HIST2H2AC | 0.161012 | -0.33826 | 0.453012 |

|          |          |          |          |
|----------|----------|----------|----------|
| CIAPIN1  | 0.646644 | -0.00461 | 0.837353 |
| ZFAND6   | 0.654698 | 0.332586 | 0.84209  |
| FAAH2    | 0.003522 | 1.419218 | 0.067937 |
| SMYD5    | 0.957906 | 0.232783 | 0.994122 |
| PTRHD1   | 0.070198 | -0.32239 | 0.309184 |
| XAF1     | 0.101663 | 1.000745 | 0.363022 |
| OTUD7B   | 0.203799 | 0.672277 | 0.497963 |
| LAIR1    | 0.075781 | 1.37461  | 0.320798 |
| RALGAPA1 | 0.022597 | 1.092279 | 0.180886 |
| ABLM2    | 0.078579 | -1.00587 | 0.32578  |
| THOC7    | 0.866426 | -0.09266 | 0.953042 |
| SIGIRR   | 0.056503 | -0.75963 | 0.277829 |
| NADSYN1  | 0.016199 | 1.04244  | 0.154611 |
| ELP2     | 0.02152  | 0.459689 | 0.175496 |
| LAMTOR1  | 0.840557 | 0.014946 | 0.939212 |
| DHRS7B   | 0.131757 | -0.34357 | 0.413476 |
| TWF2     | 0.023065 | 0.304121 | 0.182986 |
| NCAPH2   | 0.26189  | 0.678909 | 0.565402 |
| GRAMD4   | 0.389353 | 0.29627  | 0.667643 |
| DESI1    | 0.117167 | 0.773464 | 0.389929 |
| FAM109B  | 0.740193 | 0.109324 | 0.886428 |
| KIAA0930 | 0.360975 | 0.276672 | 0.644411 |
| TANGO2   | 0.131811 | -0.60821 | 0.413476 |
| SNRNP48  | 0.614399 | -0.17057 | 0.819914 |
| MRM1     | 0.093509 | 1.031304 | 0.348258 |
| SMEK1    | 0.466082 | 0.226883 | 0.721065 |
| LYRM5    | 0.819598 | -0.17578 | 0.92687  |
| TYW3     | 0.546526 | 0.258596 | 0.778915 |
| CCSAP    | 0.775021 | -0.10382 | 0.904436 |
| NAPEPLD  | 0.739498 | 0.136712 | 0.886295 |
| RAB12    | 0.147661 | 0.269159 | 0.436386 |
| PLEKHA7  | 0.07517  | -0.7175  | 0.31955  |
| DENND5A  | 0.250158 | 0.563886 | 0.553572 |
| SDE2     | 0.973875 | 0.07075  | 0.998921 |
| WBSCR17  | 0.568515 | 0.235358 | 0.791838 |
| GRHL2    | 0.702654 | -0.27904 | 0.866289 |
| RCSD1    | 0.349127 | -0.29798 | 0.635199 |
| ACAD10   | 0.572756 | 0.3016   | 0.794481 |
| PYHIN1   | 0.372503 | -0.44339 | 0.655575 |
| KRT80    | 0.072317 | 1.364936 | 0.313796 |
| NIPBL    | 0.568296 | 0.375403 | 0.791838 |
| SLC25A25 | 0.053456 | 1.227257 | 0.271092 |
| PDE12    | 0.76912  | 0.05266  | 0.901915 |
| B4GALNT3 | 0.198875 | 0.655581 | 0.49217  |
| HEPHL1   | 0.725845 | -0.19598 | 0.877996 |
| LIN54    | 0.257971 | 0.396274 | 0.560462 |
| PRR5L    | 0.46818  | 0.24257  | 0.722799 |
| FSTL4    | 0.65015  | 0.270801 | 0.839222 |
| CAPN13   | 0.969476 | 0.101966 | 0.997592 |
| TENM4    | 4.32E-07 | 2.106692 | 7.61E-05 |
| ZNF280D  | 0.779121 | -0.04387 | 0.906856 |
| OGFOD2   | 0.388612 | 0.421807 | 0.667643 |
| NAA16    | 0.196206 | 0.629903 | 0.490309 |
| MFSD5    | 0.000911 | 0.971099 | 0.028963 |
| KIAA1161 | 0.054252 | 1.189107 | 0.273313 |
| LRRC8E   | 0.788605 | -0.07707 | 0.911483 |
| SLC18B1  | 0.396169 | 0.519141 | 0.67382  |
| HMBX1    | 0.667193 | -0.34624 | 0.848605 |

|                 |          |          |          |
|-----------------|----------|----------|----------|
| RHBDD2          | 0.617691 | 0.222078 | 0.822194 |
| SLC25A24        | 0.12513  | 0.276104 | 0.401334 |
| REEP3           | 4.98E-05 | 2.122125 | 0.003588 |
| RETSAT          | 0.257957 | 0.041048 | 0.560462 |
| ACSM5           | 0.029137 | -0.70967 | 0.206759 |
| RINT1           | 0.876815 | 0.148965 | 0.958859 |
| TMEM214         | 0.018045 | 0.414303 | 0.162744 |
| TCTN3           | 0.001159 | 1.092194 | 0.033154 |
| UGT3A1          | 0.15526  | 0.283195 | 0.444958 |
| MFSD12          | 0.009698 | 1.339508 | 0.119248 |
| KIAA1211L       | 0.456727 | -0.48235 | 0.715224 |
| HIBCH           | 0.179497 | -0.22916 | 0.471072 |
| RWDD4           | 0.817274 | -0.56183 | 0.926828 |
| C3orf17         | 0.087816 | 0.861686 | 0.339301 |
| PRPF40B         | 0.083185 | 0.956409 | 0.332962 |
| ARMC6           | 0.051843 | 1.280186 | 0.266818 |
| ESRP1           | 0.699591 | -0.42984 | 0.864146 |
| TTI2            | 0.130663 | 0.796253 | 0.412519 |
| ANKRD54         | 0.948334 | 0.097788 | 0.990766 |
| SLC30A6         | 0.004803 | 0.80969  | 0.081112 |
| TAPT1           | 0.474179 | -0.63142 | 0.727018 |
| KANK3           | 0.101235 | -0.95177 | 0.361959 |
| JMJD6           | 0.047243 | 0.549585 | 0.255923 |
| PPP1R18         | 0.000554 | 0.954674 | 0.021722 |
| MZT2B           | 0.201482 | 0.751103 | 0.49489  |
| PTRF            | 0.546147 | -0.06009 | 0.778738 |
| ZCCHC8          | 0.016499 | 0.600367 | 0.155558 |
| CDC42EP5        | 0.161533 | 0.411888 | 0.453012 |
| RPUSD3          | 0.678199 | 0.245608 | 0.854957 |
| FAM180B         | 0.556057 | 0.128542 | 0.783439 |
| DHX57           | 0.003514 | 0.819487 | 0.067901 |
| MRPL54          | 0.484149 | -0.53323 | 0.735071 |
| ERAP2           | 0.200294 | -1.098   | 0.493506 |
| LPCAT3          | 0.524435 | -0.32044 | 0.764023 |
| CDC73           | 0.81486  | -0.10527 | 0.924847 |
| PMF1            | 0.055039 | 1.201065 | 0.274516 |
| GTF2H2C         | 0.015301 | 0.488959 | 0.151713 |
| FAM117B         | 0.299797 | -0.68355 | 0.602797 |
| MRPL14          | 0.581778 | -0.53622 | 0.797998 |
| SLC27A4         | 0.077655 | 0.353851 | 0.324641 |
| LLGL2           | 0.005432 | -0.89859 | 0.086993 |
| CC2D1A          | 0.627809 | 0.02692  | 0.828932 |
| TATDN1          | 0.277891 | 0.639224 | 0.579677 |
| LETMD1          | 0.860982 | -0.02049 | 0.950165 |
| METTL2B;METTL2A | 0.010055 | 1.631162 | 0.121214 |
| MSANTD2         | 0.110316 | 0.7542   | 0.378798 |
| DUS1L           | 0.274494 | -0.62993 | 0.577625 |
| C3orf33         | 0.723033 | -0.21947 | 0.876654 |
| TAF2            | 0.137223 | 0.54531  | 0.422409 |
| C8orf82         | 0.343868 | -0.37571 | 0.630156 |
| MED27           | 0.008473 | 0.990397 | 0.110694 |
| EDC4            | 0.000392 | 0.509109 | 0.017322 |
| CEP85           | 0.744459 | 0.237485 | 0.888419 |
| TMEM53          | 0.339343 | -0.5721  | 0.626528 |
| FAHD2B          | 0.912516 | -0.10756 | 0.975706 |
| PNCK            | 0.322009 | 0.130066 | 0.613139 |
| PRMT9           | 0.220201 | 0.543697 | 0.518085 |
| PRPF8           | 0.039276 | 0.259247 | 0.236232 |

|           |          |          |          |
|-----------|----------|----------|----------|
| DENND1B   | 0.194685 | 0.374434 | 0.488911 |
| FBXO42    | 0.542247 | 0.196221 | 0.775607 |
| SCYL2     | 0.177368 | 0.244919 | 0.468602 |
| TTC27     | 0.008373 | 1.317309 | 0.110127 |
| NIPAL3    | 0.048375 | -1.31644 | 0.258191 |
| SFXN4     | 0.387864 | 0.507153 | 0.666532 |
| PLBD1     | 0.986843 | -0.00329 | 1        |
| CASC4     | 0.037428 | 0.38115  | 0.231646 |
| FDX1L     | 0.206464 | 0.936681 | 0.500256 |
| WDR73     | 0.353546 | 0.435395 | 0.638094 |
| CNNM4     | 0.840557 | -0.09078 | 0.939212 |
| NFRKB     | 0.3791   | 0.320085 | 0.660167 |
| GGT6      | 0.369092 | -0.33918 | 0.652262 |
| MZT2A     | 0.082817 | 1.867967 | 0.332815 |
| FAHD1     | 0.330591 | 0.264964 | 0.619341 |
| TNFAIP8L2 | 0.915947 | -0.39943 | 0.977664 |
| KLC3      | 0.784435 | -0.1125  | 0.909583 |
| RPL22L1   | 0.185268 | 1.108826 | 0.477641 |
| LEG1      | 0.102462 | -0.62896 | 0.364372 |
| SLC39A4   | 0.08092  | -0.90701 | 0.328405 |
| C22orf39  | 0.08528  | -0.37233 | 0.335537 |
| PKN3      | 0.701126 | 0.094179 | 0.865518 |
| C15orf26  | 0.503943 | -0.28377 | 0.748324 |
| ERICH5    | 0.133624 | -0.64398 | 0.416228 |
| ANKRD16   | 0.344752 | -0.54852 | 0.631068 |
| ALKBH5    | 0.011508 | 1.293195 | 0.129242 |
| FAM171B   | 0.08528  | -0.31114 | 0.335537 |
| PDXDC1    | 0.590866 | 0.169042 | 0.804875 |
| GALNT18   | 0.173297 | 0.901035 | 0.464598 |
| TLDC1     | 0.228671 | 0.229569 | 0.528484 |
| INTS5     | 0.010095 | 0.909858 | 0.121571 |
| LRRC8B    | 0.496019 | 0.305998 | 0.743024 |
| TMEM154   | 0.153189 | 0.454519 | 0.443165 |
| GIMAP6    | 0.497979 | 0.333217 | 0.744803 |
| VWA1      | 0.311298 | -0.20606 | 0.609894 |
| RSBN1L    | 0.195656 | 0.739065 | 0.490289 |
| ABHD17C   | 0.522696 | -0.42255 | 0.763395 |
| SLC27A1   | 0.474191 | -0.16721 | 0.727018 |
| EMB       | 0.818371 | 0.137497 | 0.92687  |
| RFWD3     | 0.09362  | 0.387971 | 0.348554 |
| PGM2L1    | 0.082197 | 0.864461 | 0.330671 |
| CTR9      | 0.308157 | 0.208913 | 0.609277 |
| AAGAB     | 0.083702 | 1.435295 | 0.333456 |
| TMEM88    | 0.163438 | -0.30699 | 0.453012 |
| PODNL1    | 0.119941 | 0.859075 | 0.39497  |
| PPIP5K1   | 0.330021 | 0.312506 | 0.619341 |
| TTC37     | 0.38573  | 0.193451 | 0.664306 |
| ULK3      | 0.697991 | -0.22683 | 0.864146 |
| IYD       | 0.654248 | -0.33178 | 0.84199  |
| SHQ1      | 0.785681 | -0.23075 | 0.910648 |
| KCTD18    | 0.247289 | 0.718381 | 0.550407 |
| DARS2     | 0.939534 | 0.081664 | 0.986498 |
| LILRA6    | 0.101707 | 0.952191 | 0.363061 |
| TMEM65    | 0.073842 | 0.88951  | 0.316943 |
| INO80C    | 0.513901 | 0.445882 | 0.756193 |
| TTC33     | 0.264588 | 0.740128 | 0.567281 |
| KLHDC10   | 0.466537 | 0.362567 | 0.721669 |
| MYO7B     | 0.529463 | 0.099192 | 0.768066 |

|          |          |          |          |
|----------|----------|----------|----------|
| CCDC174  | 0.023962 | 0.892734 | 0.187023 |
| FBXO38   | 0.684434 | -0.23665 | 0.85709  |
| NCEH1    | 0.016204 | 0.411862 | 0.154611 |
| FIGNL1   | 0.536414 | 0.059884 | 0.773175 |
| PAPD4    | 0.844559 | 0.030843 | 0.942239 |
| TRAT1    | 0.293533 | 0.433064 | 0.596247 |
| SPSB3    | 0.452579 | 0.429457 | 0.712397 |
| FBXO46   | 1        | -0.06525 | 1        |
| TRIM65   | 0.012278 | 1.321428 | 0.134963 |
| RHBDF2   | 0.041276 | 0.943216 | 0.240826 |
| ELMSAN1  | 0.255167 | 0.434995 | 0.557593 |
| BRAT1    | 0.059651 | 0.709003 | 0.285693 |
| WDR59    | 0.68257  | -0.03611 | 0.85709  |
| ZC3H14   | 0.181644 | 0.400845 | 0.472575 |
| CNST     | 0.073159 | 0.910772 | 0.31592  |
| CCDC137  | 0.380889 | 0.481994 | 0.661698 |
| OGFOD3   | 0.088169 | 0.436378 | 0.339301 |
| ZNF773   | 0.639304 | 0.178561 | 0.834571 |
| TXNDC11  | 0.651282 | 0.213136 | 0.839222 |
| LARP1    | 0.002547 | 0.539372 | 0.055387 |
| ATAD2    | 0.021605 | 1.332059 | 0.175931 |
| TMED8    | 0.869474 | -0.49594 | 0.955732 |
| SLC30A9  | 0.280828 | -0.206   | 0.583434 |
| CPLX2    | 0.300882 | 0.380423 | 0.602797 |
| TRAF7    | 0.003609 | 1.359564 | 0.069011 |
| APOA5    | 0.171298 | 0.79737  | 0.462219 |
| DEGS2    | 0.690553 | -0.1171  | 0.859876 |
| BLOC1S3  | 0.74404  | 0.161505 | 0.888303 |
| BLOC1S2  | 0.151386 | -0.16303 | 0.44125  |
| RICTOR   | 0.155183 | 0.424795 | 0.444958 |
| WDR74    | 0.134222 | 0.575459 | 0.417223 |
| AGTRAP   | 0.774166 | -0.12807 | 0.903913 |
| FAM111B  | 0.550116 | -0.42789 | 0.781327 |
| SAMD1    | 0.228283 | 0.654284 | 0.528484 |
| SMARCD3  | 0.203689 | 0.811743 | 0.497963 |
| SARM1    | 0.000215 | 1.596884 | 0.011194 |
| NHS      | 0.060233 | 0.708472 | 0.287134 |
| METAP1D  | 0.339149 | -0.39517 | 0.626409 |
| MTHFD1L  | 0.028293 | 0.464268 | 0.203235 |
| ANKRD12  | 0.668688 | -0.22554 | 0.849728 |
| ANKRD11  | 0.868475 | 0.07264  | 0.954823 |
| AFTPH    | 0.387429 | -0.37749 | 0.666378 |
| FIP1L1   | 0.066208 | 0.402618 | 0.300455 |
| CRTC3    | 0.035051 | 1.230975 | 0.223337 |
| CRTC1    | 0.354342 | 0.762277 | 0.63835  |
| SASS6    | 0.832496 | -0.08511 | 0.93551  |
| CSPG4    | 0.169043 | 0.455045 | 0.459676 |
| MOXD1    | 0.322459 | 0.338734 | 0.613498 |
| CYP20A1  | 0.466082 | 0.128186 | 0.721065 |
| SFTA2    | 0.890867 | -0.10187 | 0.966699 |
| KDELC1   | 4.29E-11 | 3.807787 | 1.58E-07 |
| TMEM205  | 0.794443 | 0.136355 | 0.913708 |
| UQCC3    | 0.115826 | -1.09141 | 0.388045 |
| IL27RA   | 0.281331 | 0.3165   | 0.583877 |
| C16orf54 | 0.796376 | 0.104473 | 0.914822 |
| LRSAM1   | 0.005432 | 0.745559 | 0.086993 |
| FAM180A  | 0.846287 | -0.12681 | 0.942576 |
| FAM198B  | 2.77E-05 | 2.45602  | 0.002167 |

|                         |          |          |          |
|-------------------------|----------|----------|----------|
| PARM1                   | 0.005845 | -1.86216 | 0.089662 |
| SHISA2                  | 0.154635 | 0.611851 | 0.444958 |
| TMCO3                   | 0.087242 | 1.191885 | 0.338322 |
| DHRS11                  | 0.143106 | -0.51001 | 0.430717 |
| LCLAT1                  | 0.089414 | 0.379991 | 0.341477 |
| SBSN                    | 0.655845 | 0.061411 | 0.84209  |
| IGFL2                   | 0.163438 | -0.29742 | 0.453012 |
| ENPP6                   | 0.992139 | -0.0798  | 1        |
| PET117                  | 0.923284 | 0.074975 | 0.980751 |
| C6orf89                 | 0.256839 | 0.718433 | 0.560316 |
| CES3                    | 0.701171 | -0.18699 | 0.865518 |
| HHIPL2                  | 0.411887 | 0.269763 | 0.683152 |
| PRSS57                  | 0.455572 | -0.42521 | 0.71417  |
| OLFML1                  | 0.630149 | -0.07043 | 0.830965 |
| FAM175A                 | 0.647413 | 0.146186 | 0.83786  |
| CWC27                   | 0.161013 | 0.222007 | 0.453012 |
| OLFM4                   | 0.907566 | -0.29498 | 0.9734   |
| DHRS13                  | 0.834084 | -0.29021 | 0.935999 |
| LAYN                    | 0.310183 | 0.242633 | 0.609864 |
| VSTM1                   | 1        | -0.02213 | 1        |
| METTL7B                 | 0.913061 | 0.124032 | 0.975706 |
| DRAM2                   | 0.838522 | 0.318991 | 0.93883  |
| PLXDC2                  | 0.000261 | 0.857378 | 0.012879 |
| B3GNT9                  | 0.000146 | 1.775159 | 0.008402 |
| C16orf89                | 0.020123 | -1.49696 | 0.169778 |
| ZDHHC24                 | 0.960779 | -0.04086 | 0.994122 |
| CXCL17                  | 0.117742 | -1.28862 | 0.39145  |
| PI16                    | 0.046776 | -0.98701 | 0.254312 |
| SEZ6L2                  | 0.001994 | 2.072583 | 0.047089 |
| MFSD7                   | 0.045871 | -0.66882 | 0.252361 |
| TMEM108                 |          | 0        |          |
| CLEC18B;CLEC18C;CLEC18A | 0.829742 | 0.073775 | 0.933615 |
| KIAA1324                | 0.702166 | -0.36695 | 0.866168 |
| CD300LG                 | 0.331588 | -0.11319 | 0.619341 |
| BTNL9                   | 0.014023 | -1.13097 | 0.144006 |
| CRELD2                  | 0.221112 | 0.299579 | 0.519064 |
| CCBE1                   | 0.163438 | -0.27906 | 0.453012 |
| PAMR1                   | 0.52523  | 0.269723 | 0.764479 |
| NPNT                    | 0.887225 | -0.03697 | 0.96416  |
| LRRN1                   | 0.287388 | 0.451028 | 0.590811 |
| LRIG3                   | 0.913274 | -0.0612  | 0.975706 |
| WDR82                   | 0.101186 | 0.261402 | 0.361901 |
| APOOL                   | 0.267798 | -0.19133 | 0.570195 |
| BAIAP2L2                | 0.169846 | -0.42564 | 0.461029 |
| TMC5                    | 0.801929 | 0.169674 | 0.918063 |
| LRRC31                  | 0.328    | 0.277417 | 0.618682 |
| ADAMTSL4                | 0.047361 | 1.225115 | 0.255923 |
| FAT4                    | 0.274588 | 0.444146 | 0.577625 |
| DPP8                    | 0.011362 | 1.223622 | 0.128971 |
| WASH2P;WASH3P           | 0.007628 | 0.460895 | 0.10525  |
| ATF7IP                  | 0.002156 | 1.693407 | 0.049824 |
| RANBP10                 | 0.284062 | 0.508203 | 0.587347 |
| NHLRC1                  | 0.626197 | 0.132701 | 0.828579 |
| CYP2R1                  | 0.045488 | -0.44714 | 0.250872 |
| PACS1                   | 0.022281 | 0.405175 | 0.179329 |
| BCOR                    | 0.062137 | 0.567293 | 0.291647 |
| MUC6                    | 0.899924 | 0.233065 | 0.971581 |
| MPRIIP                  | 0.009264 | 0.449622 | 0.116462 |

|           |          |          |          |
|-----------|----------|----------|----------|
| RAB11FIP1 | 0.032856 | 0.53525  | 0.217297 |
| CHRD12    | 0.024484 | -0.77673 | 0.189451 |
| IGSF10    | 0.044667 | -0.9495  | 0.248727 |
| SOSTDC1   | 0.324967 | -0.65061 | 0.615473 |
| RBMS3     | 0.418065 | 0.458419 | 0.688796 |
| NAPRT     | 0.44615  | -0.31163 | 0.706795 |
| DNMBP     | 0.727951 | 0.241143 | 0.879393 |
| HACD2     | 0.563811 | -0.03047 | 0.789479 |
| B3GALT1   | 0.227354 | 0.641918 | 0.527418 |
| GIGYF2    | 0.010194 | 0.612308 | 0.121876 |
| CD109     | 0.000985 | 1.279117 | 0.030181 |
| THADA     | 0.12482  | 0.662424 | 0.401334 |
| HSDL2     | 0.000444 | -0.71258 | 0.019015 |
| CCBL2     | 0.376761 | 0.244518 | 0.658264 |
| B3GNT6    | 0.576048 | 0.271394 | 0.796634 |
| TMEM184A  | 0.178045 | -0.79942 | 0.469506 |
| CERS6     | 0.382795 | -0.34893 | 0.662478 |
| PPP1R21   | 0.043207 | 0.411913 | 0.246126 |
| SCARA5    | 0.296011 | -0.51605 | 0.598661 |
| IL34      | 0.291769 | 0.313884 | 0.595183 |
| CYHR1     | 0.034334 | 1.431718 | 0.222148 |
| ADAMTSL5  | 0.469172 | -0.3326  | 0.723926 |
| THSD4     | 0.090662 | 0.56299  | 0.343901 |
| KDM7A     | 0.501076 | -0.27721 | 0.74652  |
| DTHD1     | 0.339213 | -0.07764 | 0.626409 |
| TRIM72    | 0.312494 | 0.4662   | 0.610732 |
| SYNE3     | 0.002161 | 0.914388 | 0.049824 |
| LIN28B    | 0.474521 | 0.444796 | 0.727424 |
| AEBP2     | 0.508455 | 0.152804 | 0.752448 |
| MACC1     | 0.034562 | 1.480893 | 0.222216 |
| DEF8      | 0.702511 | -0.10761 | 0.866226 |
| ZNF574    | 0.727828 | 0.183569 | 0.87934  |
| GBP6      | 0.340337 | 0.695529 | 0.627258 |
| FRRS1     | 0.398985 | 0.314769 | 0.67622  |
| NFXL1     | 0.960544 | -0.04884 | 0.994122 |
| MBOAT1    | 0.014002 | 1.738969 | 0.144006 |
| ATG14     | 0.0881   | 0.741479 | 0.339301 |
| NBEAL2    | 0.604598 | -0.06842 | 0.813002 |
| FGD5      | 0.026869 | 1.090607 | 0.198225 |
| GDPGP1    | 0.90759  | 0.029432 | 0.9734   |
| CCDC141   | 0.219797 | 0.71505  | 0.517683 |
| DPY19L3   | 0.649663 | 0.556767 | 0.839222 |
| SLCO4C1   | 0.341849 | -0.50159 | 0.629182 |
| C9orf171  | 1        | -0.02105 | 1        |
| C15orf39  | 0.844739 | 0.203471 | 0.942239 |
| QSOX2     | 0.047462 | 0.714652 | 0.255923 |
| MMS22L    | 0.172222 | 0.358858 | 0.463535 |
| SRCAP     | 0.232412 | 0.64013  | 0.534123 |
| CCDC129   | 0.711489 | -0.26387 | 0.870161 |
| FAM83H    | 0.249724 | -0.54689 | 0.552833 |
| BPMS2     | 0.331588 | -0.12378 | 0.619341 |
| RINL      | 0.346277 | -0.31613 | 0.632606 |
| FAM65A    | 0.015909 | 0.812776 | 0.153751 |
| NBEAL1    | 0.256527 | -0.37941 | 0.560028 |
| C19orf35  | 0.472922 | -0.26232 | 0.727018 |
| WDFY4     | 0.426707 | 0.128399 | 0.693599 |
| GK5       | 0.440294 | -0.21354 | 0.70314  |
| C1orf122  | 0.264379 | 1.208829 | 0.566943 |



|          |          |          |          |
|----------|----------|----------|----------|
| N/A      | 0.038025 | 0.700358 | 0.233324 |
| MFSD6    | 0.370566 | -0.41417 | 0.654137 |
| ARHGEF18 | 0.077647 | 0.669135 | 0.324641 |
| TBC1D9   | 0.028037 | 0.736914 | 0.203111 |
| UBR3     | 0.032777 | 0.843651 | 0.217297 |
| TMPPE    | 0.38573  | 0.266997 | 0.664306 |
| BARGIN   | 0.120332 | 0.268838 | 0.39497  |
| ANKRD13D | 0.770646 | 0.067547 | 0.903323 |
| CDHR3    | 0.594656 | -0.09143 | 0.806337 |
| FAM92B   | 0.590114 | 0.409132 | 0.804875 |
| KIAA1211 | 0.001636 | 1.711414 | 0.041715 |
| KIAA0408 | 0.275346 | -0.65913 | 0.578109 |
| UBN2     | 0.646384 | -0.0267  | 0.837353 |
| CEP128   | 0.109354 | 0.942734 | 0.377246 |
| PIK3AP1  | 0.293376 | 0.791021 | 0.596247 |
| TMEM26   | 0.601315 | 0.24086  | 0.811336 |
| ARHGAP27 | 0.367851 | 0.136579 | 0.650718 |
| CCDC149  | 0.88648  | 0.148216 | 0.96416  |
| C11orf57 | 0.442234 | 0.401957 | 0.703704 |
| C15orf52 | 0.458401 | 0.574692 | 0.715672 |
| DENND5B  | 0.074369 | 0.350352 | 0.317894 |
| LHFPL2   | 0.0008   | 2.397999 | 0.026879 |
| PNPLA7   | 0.628829 | -0.1493  | 0.829785 |
| LANCL3   | 0.161733 | 0.463597 | 0.453012 |
| FGD6     | 0.040525 | 0.870451 | 0.240216 |
| GPRIN3   | 0.975752 | 0.094841 | 0.998921 |
| NUDT18   | 0.235662 | 0.81399  | 0.537803 |
| TOM1L2   | 0.052871 | -0.61864 | 0.269122 |
| IL17REL  | 0.992139 | 0.0309   | 1        |
| NCCRP1   | 0.711266 | 0.224243 | 0.870136 |
| SYDE1    | 0.00023  | 1.85617  | 0.011713 |
| PAXIP1   | 0.931766 | 0.014059 | 0.984157 |
| STXBP4   | 0.348036 | 0.611602 | 0.633525 |
| C1orf186 | 1        | -0.0313  | 1        |
| CYP4V2   | 0.295394 | -0.31571 | 0.598344 |
| MBOAT2   | 0.254598 | 0.565054 | 0.557593 |
| TMTC3    | 7.41E-07 | 0.993436 | 0.000117 |
| GTF2H5   | 0.439987 | 0.578598 | 0.70314  |
| XIRP1    | 0.496663 | 0.438298 | 0.74366  |
| VPS13C   | 0.892438 | -0.05647 | 0.966699 |
| ACAD11   | 0.067408 | -1.15037 | 0.30217  |
| USP34    | 0.075769 | 0.847424 | 0.320798 |
| USP30    | 0.18384  | 0.719062 | 0.474829 |
| RAPH1    | 0.7143   | 0.058081 | 0.87164  |
| USP53    | 0.85486  | 0.040164 | 0.946993 |
| USP54    | 0.544493 | 0.191246 | 0.778118 |
| USP43    | 0.965711 | 0.115361 | 0.99616  |
| SLC25A26 | 0.071983 | 0.958656 | 0.313575 |
| MOB2     | 0.639209 | 0.263899 | 0.834546 |
| MOB3C    | 0.430232 | 0.248426 | 0.695651 |
| UNC13D   | 0.389353 | 0.031046 | 0.667643 |
| CHSY3    | 0.238305 | 0.36016  | 0.540624 |
| IKBIP    | 1.44E-05 | 0.883939 | 0.001292 |
| PREX2    | 1        | -0.02889 | 1        |
| FRA10AC1 | 0.131062 | 0.601283 | 0.413427 |
| UBE2R2   | 0.96271  | 0.369456 | 0.99547  |
| CYS1     | 0.014974 | 1.196389 | 0.150049 |
| KCTD1    | 0.021635 | 1.108176 | 0.176046 |

|             |          |          |          |
|-------------|----------|----------|----------|
| HIST2H3A    | 0.724835 | 0.349482 | 0.877157 |
| MED13L      | 0.792343 | 0.046495 | 0.913596 |
| LARP4       | 0.22653  | 1.199774 | 0.525726 |
| SMIM5       | 0.310183 | 0.303171 | 0.609864 |
| TMUB2       | 0.102454 | 1.081026 | 0.364372 |
| MED25       | 0.1263   | 0.845414 | 0.403572 |
| TUBA1A      | 0.000455 | 0.827279 | 0.019269 |
| H2AFV;H2AFZ | 0.819984 | -0.06266 | 0.92687  |
| RPS27L      | 0.572777 | -0.55076 | 0.794481 |
| CBLL1       | 0.090516 | 1.245114 | 0.343901 |
| FBN3        | 0.0018   | 1.323348 | 0.044357 |
| INTS8       | 0.08872  | 0.664994 | 0.34076  |
| PGAP1       | 0.851507 | -0.08295 | 0.945447 |
| MTSS1L      | 0.923804 | -0.12771 | 0.980751 |
| NOL8        | 0.216052 | 0.654585 | 0.512741 |
| SSH2        | 0.074758 | 0.647639 | 0.318513 |
| CCDC80      | 3.93E-06 | 3.312843 | 0.000458 |
| ERN2        | 0.234387 | -0.79928 | 0.536219 |
| CEP68       | 0.724189 | 0.190023 | 0.876654 |
| BTN2A1      | 0.954782 | -0.14323 | 0.993074 |
| SUPT6H      | 0.007049 | 0.422447 | 0.100623 |
| SND1        | 0.354055 | 0.116709 | 0.638094 |
| MARK2       | 0.28378  | 0.203948 | 0.586874 |
| COX15       | 0.286462 | 0.656914 | 0.590053 |
| DDX46       | 0.09193  | 0.285797 | 0.345626 |
| RUFY3       | 0.528742 | 0.028448 | 0.767576 |
| SV2A        | 0.095807 | 0.378851 | 0.352331 |
| TRIL        | 0.981644 | -0.06204 | 1        |
| TRMT10C     | 0.515876 | 0.225599 | 0.757825 |
| BZW1        | 0.025346 | 0.38632  | 0.192941 |
| CHST9       | 0.684725 | 0.280515 | 0.85709  |
| CYB5R4      | 0.286383 | 0.5654   | 0.590053 |
| MON1B       | 0.021105 | 0.679155 | 0.173882 |
| LRRC8D      | 0.267723 | 0.579086 | 0.570195 |
| ABHD13      | 0.781397 | 0.092788 | 0.90873  |
| ASRGL1      | 0.631426 | -0.03048 | 0.830965 |
| KCTD9       | 0.072537 | 0.65511  | 0.314507 |
| DHX30       | 0.005889 | 0.513212 | 0.089865 |
| EIF3M       | 0.201834 | 0.161075 | 0.495032 |
| MEPCE       | 0.266304 | 0.572    | 0.568807 |
| CENPQ       | 0.161533 | 0.368738 | 0.453012 |
| ARMCX2      | 0.289145 | 0.460158 | 0.593134 |
| CDC37L1     | 0.319751 | 0.947931 | 0.613139 |
| PARS2       | 0.269226 | -0.33573 | 0.571371 |
| FAM73B      | 0.762934 | 0.121261 | 0.899242 |
| RSRC2       | 0.081478 | 1.239648 | 0.329697 |
| ARMCX6      | 0.289035 | 0.668107 | 0.593134 |
| RRAGA       | 0.651389 | -0.09037 | 0.839222 |
| CYFIP1      | 0.03232  | 0.134986 | 0.215938 |
| DOK3        | 0.296961 | 0.870412 | 0.599817 |
| NDUFAF7     | 0.171072 | 0.694833 | 0.461822 |
| FA2H        | 0.187439 | -0.81839 | 0.480067 |
| GET4        | 0.923804 | -0.08058 | 0.980751 |
| GDPD3       | 0.947482 | 0.222412 | 0.990063 |
| COPS6       | 0.871617 | 0.108796 | 0.956098 |
| LPCAT2      | 0.175259 | 0.223606 | 0.466796 |
| ENOSF1      | 0.809323 | -0.18829 | 0.921586 |
| MAEA        | 0.221087 | 0.599844 | 0.519064 |

|           |          |          |          |
|-----------|----------|----------|----------|
| EPM2AIP1  | 0.424795 | 0.209966 | 0.693599 |
| DHX32     | 0.796942 | 0.13199  | 0.915123 |
| TAOK1     | 0.118765 | 0.33858  | 0.392409 |
| RAB11FIP2 | 0.924807 | -0.12664 | 0.981628 |
| VASH1     | 0.000863 | 1.033909 | 0.027972 |
| SH3BP5L   | 0.032654 | 1.143381 | 0.217297 |
| FASTKD5   | 0.244183 | 0.338443 | 0.547425 |
| DPH6      | 0.944971 | 0.128732 | 0.988556 |
| EEPD1     | 0.19622  | 0.692595 | 0.490309 |
| KDM3B     | 0.157109 | 0.397933 | 0.447022 |
| CHMP1B    | 0.74653  | -0.27236 | 0.889644 |
| RASGRP2   | 0.277875 | -0.76928 | 0.579677 |
| CHST15    | 0.000131 | 1.339641 | 0.007794 |
| RRM2B     | 0.085741 | -0.39862 | 0.335537 |
| HS2ST1    | 0.025131 | 0.497599 | 0.191949 |
| CHST3     | 0.007678 | 1.434777 | 0.105778 |
| STRADA    | 0.019008 | 1.24624  | 0.166597 |
| NIPA1     | 0.019965 | 2.008416 | 0.169553 |
| MICAL3    | 0.121792 | 0.811449 | 0.397343 |
| BHLHA15   | 0.944971 | 0.100162 | 0.988556 |
| OTOP3     | 0.724261 | -0.05186 | 0.876654 |
| DYM       | 0.129607 | 0.96273  | 0.410353 |
| SLC29A4   | 0.57907  | -0.13724 | 0.796675 |
| PHF5A     | 0.317645 | 0.111109 | 0.613139 |
| AAED1     | 0.044207 | 0.869974 | 0.24851  |
| APTX      | 0.849731 | 0.28623  | 0.944945 |
| SLC36A1   | 0.078    | 1.090084 | 0.325593 |
| ERMP1     | 0.426712 | 0.179407 | 0.693599 |
| TRMT1L    | 0.347246 | 0.21675  | 0.632606 |
| ZC3HAV1   | 0.392997 | 0.161705 | 0.671013 |
| MRPL21    | 0.050493 | 0.32091  | 0.263221 |
| PID1      | 0.418838 | -0.51807 | 0.688796 |
| EFTUD1    | 0.689846 | 0.124645 | 0.859429 |
| MAMDC2    | 0.613722 | 0.038251 | 0.819264 |
| FAM122B   | 0.351404 | -0.48404 | 0.636424 |
| SETX      | 0.31965  | -0.63498 | 0.613139 |
| DPY19L4   | 0.250228 | 0.769531 | 0.553616 |
| TRAPPC11  | 0.38573  | 0.293148 | 0.664306 |
| NEGR1     | 0.654513 | 0.550366 | 0.84209  |
| KANSL1    | 0.065626 | 0.755778 | 0.299507 |
| NUP54     | 0.112657 | 0.201007 | 0.382523 |
| ATG9A     | 0.032856 | 0.690446 | 0.217297 |
| LYSMD3    | 0.77488  | -0.22671 | 0.904436 |
| C14orf159 | 0.78936  | -0.03921 | 0.911483 |
| CCDC186   | 0.409636 | 0.545629 | 0.682657 |
| ARMC9     | 0.000579 | 2.106255 | 0.022454 |
| GPR155    | 0.473815 | 0.337979 | 0.727018 |
| PRICKLE2  | 0.258196 | 0.278087 | 0.560621 |
| C16orf62  | 0.004157 | 0.360393 | 0.073531 |
| POGZ      | 0.038652 | 0.521139 | 0.235412 |
| SLC46A3   | 0.493121 | 0.437924 | 0.741084 |
| ZFYVE16   | 0.986843 | 0.024175 | 1        |
| MON2      | 0.025781 | 0.479649 | 0.193808 |
| UBE3B     | 0.13981  | 0.782822 | 0.426504 |
| DENND4A   | 0.465979 | -0.32747 | 0.721065 |
| TMC7      | 0.329349 | -0.18647 | 0.619341 |
| TMC6      | 0.245026 | 0.637717 | 0.548564 |
| TMC4      | 0.016364 | -1.48316 | 0.155393 |

|             |          |          |          |
|-------------|----------|----------|----------|
| MYH14       | 0.138653 | -0.16197 | 0.424105 |
| PEX26       | 0.034484 | 1.301501 | 0.222148 |
| NUFIP2      | 0.011679 | 1.374136 | 0.130055 |
| SZRD1       | 0.86047  | 0.24578  | 0.950165 |
| MAVS        | 0.704483 | 0.227038 | 0.867291 |
| CYP2U1      | 0.333277 | 0.499482 | 0.620823 |
| CLASP1      | 0.019371 | 0.457566 | 0.167192 |
| DHX29       | 0.357491 | 0.243827 | 0.641472 |
| LRP10       | 0.213664 | 0.5156   | 0.509228 |
| COMMD6      | 0.16099  | 0.754316 | 0.453012 |
| TRMT11      | 0.463508 | 0.485954 | 0.720701 |
| HDDC2       | 0.185991 | -0.26105 | 0.478129 |
| HAUS6       | 0.018279 | 1.270116 | 0.163766 |
| KDELC2      | 0.036828 | 0.398578 | 0.229759 |
| LIMS2       | 0.713141 | 0.382706 | 0.871276 |
| TTC21B      | 0.016163 | 1.009677 | 0.154611 |
| P4HA3       | 0.006955 | 1.781168 | 0.100054 |
| HEATR3      | 0.70439  | 0.061603 | 0.867291 |
| C6orf120    | 0.325316 | 0.571374 | 0.615819 |
| KIF21A      | 0.04454  | 0.978784 | 0.24851  |
| HDGFRP2     | 0.2823   | 0.334378 | 0.58545  |
| DCXR        | 0.136904 | -0.23087 | 0.421544 |
| BRAP        | 0.005438 | 1.502086 | 0.086993 |
| EMSY        | 0.043761 | 1.099665 | 0.247494 |
| AKNA        | 0.714038 | -0.22196 | 0.87164  |
| GOLGA7      | 0.177172 | -1.18367 | 0.468602 |
| RAI1        | 0.0736   | 0.810716 | 0.316471 |
| WAPAL       | 0.003023 | 1.279107 | 0.062294 |
| VMO1        | 0.657906 | -0.16514 | 0.842898 |
| R3HCC1L     | 0.862929 | 0.134903 | 0.951367 |
| PODN        | 0.291252 | 0.393034 | 0.595183 |
| IRF2BP2     | 0.835403 | 0.4295   | 0.935999 |
| SDK1        | 0.711814 | 0.319041 | 0.870161 |
| HSD17B13    | 0.016508 | -1.10294 | 0.155558 |
| CPEB2       | 0.157621 | 0.531425 | 0.44779  |
| APBB1IP     | 0.305031 | 0.664053 | 0.606083 |
| WDR53       | 0.43065  | 0.080499 | 0.695651 |
| PPP1R32     |          | 0        |          |
| BMP8A;BMP8B | 0.205086 | 0.731151 | 0.49957  |
| SNX20       | 0.120228 | 0.506079 | 0.39497  |
| SPRED2      | 0.013213 | -0.58347 | 0.140906 |
| SPRED1      | 0.49063  | -0.22042 | 0.738656 |
| CCDC91      | 0.863251 | 0.232825 | 0.951627 |
| SRGAP1      | 0.073507 | 0.903443 | 0.316363 |
| RBBP6       | 0.015817 | 1.383275 | 0.153751 |
| ARHGAP30    | 0.09687  | 1.073008 | 0.354489 |
| C5orf24     | 0.11545  | 1.358132 | 0.387731 |
| SH3RF1      | 0.945492 | 0.075193 | 0.988914 |
| GRASP       | 0.563678 | -0.16992 | 0.789479 |
| FGD2        | 0.040071 | 1.089107 | 0.239196 |
| FRMD5       | 0.411887 | 0.19441  | 0.683152 |
| TSEN54      | 0.716156 | -0.17794 | 0.873229 |
| PTAR1       | 0.459397 | 0.560697 | 0.716923 |
| ARPIN       | 0.049288 | 0.247173 | 0.260808 |
| TECPR1      | 0.577044 | 0.106454 | 0.796634 |
| RABEPK      | 0.581483 | 0.495243 | 0.797998 |
| MILR1       | 0.626197 | 0.123854 | 0.828579 |
| MTERF4      | 0.782211 | -0.1465  | 0.909001 |

|          |          |          |          |
|----------|----------|----------|----------|
| RAB44    | 0.482107 | 0.161564 | 0.733586 |
| ADAT2    | 0.319672 | -0.20821 | 0.613139 |
| HUWE1    | 0.098469 | 0.244592 | 0.357719 |
| PLEKHH3  | 0.798665 | -0.11796 | 0.916173 |
| YTHDF3   | 0.292764 | 0.31426  | 0.595788 |
| KRT77    | 0.822008 | 0.247702 | 0.928967 |
| CNTRL    | 0.031578 | 1.393985 | 0.214075 |
| CTU1     | 0.718812 | 0.246042 | 0.874478 |
| PXK      | 0.003691 | 1.180295 | 0.069741 |
| FILIP1   | 0.653609 | 0.358708 | 0.841555 |
| PIGW     | 0.269641 | 0.472196 | 0.572141 |
| STRA8    | 0.988991 | 0.010357 | 1        |
| TAF8     | 0.881649 | -0.24966 | 0.961515 |
| VTCN1    | 0.178261 | 0.261331 | 0.469506 |
| UBE2Q1   | 0.027235 | 0.538685 | 0.199515 |
| KIAA0907 | 0.808002 | -0.16586 | 0.921586 |
| MRPL55   | 0.971059 | 0.183055 | 0.997592 |
| ABI3BP   | 0.163799 | -1.0051  | 0.453154 |
| VPS13B   | 0.975703 | 0.10531  | 0.998921 |
| TMED4    | 0.934288 | 0.136738 | 0.984157 |
| MRPL10   | 0.317598 | -0.07459 | 0.613139 |
| CMC1     | 0.016059 | -0.61718 | 0.154611 |
| CENPV    | 0.819877 | 0.151796 | 0.92687  |
| SLFN11   | 0.001995 | 1.189941 | 0.047089 |
| ZER1     | 0.759508 | 0.206795 | 0.896997 |
| C11orf96 | 0.469069 | -0.63212 | 0.723869 |
| MEGF8    | 0.262189 | 0.27708  | 0.565636 |
| B3GNT8   | 0.81505  | 0.225104 | 0.924969 |
| GALNT5   | 0.025597 | 1.113052 | 0.19339  |
| TMEM179B | 0.670438 | -0.65942 | 0.850681 |
| PCGF5    | 0.241498 | 0.54231  | 0.544139 |
| GALNT7   | 0.913333 | -0.07674 | 0.975706 |
| S100A7A  | 0.322009 | 0.153845 | 0.613139 |
| AMIGO2   | 0.158829 | 0.72663  | 0.449897 |
| SCD5     | 0.338161 | 0.647523 | 0.62553  |
| PHLDB2   | 8.87E-06 | 2.210532 | 0.000881 |
| GPR126   | 0.449354 | 0.387859 | 0.709598 |
| SDCCAG8  | 0.28809  | 0.631281 | 0.591924 |
| DHDDS    | 0.012726 | 0.83149  | 0.137944 |
| GALNT10  | 0.156972 | 0.839216 | 0.447022 |
| GLRX5    | 0.825116 | -0.00903 | 0.930395 |
| TRAPPC6B | 0.260739 | 0.096341 | 0.56373  |
| TMEM55B  | 0.476218 | -0.02668 | 0.729018 |
| CLEC14A  | 0.099554 | -1.1091  | 0.359216 |
| ZBTB33   | 0.892123 | 0.105651 | 0.966699 |
| DAAM2    | 0.152721 | 0.640707 | 0.443165 |
| KIAA1328 | 0.167109 | 0.226174 | 0.457139 |
| PATL1    | 0.086275 | 0.63143  | 0.336929 |
| PEG10    | 0.338173 | -0.37006 | 0.62553  |
| ADAMTSL2 | 0.858679 | 0.200144 | 0.949134 |
| TBC1D1   | 0.357329 | 0.388431 | 0.641472 |
| DPP9     | 0.000835 | 0.753386 | 0.027481 |
| TADA2B   | 0.815888 | 0.200766 | 0.925825 |
| SYVN1    | 0.11117  | 0.546521 | 0.380668 |
| TRPT1    | 0.191702 | 0.876081 | 0.485915 |
| PRUNE    | 0.228666 | 0.585406 | 0.528484 |
| MRPL52   | 0.095704 | 1.569156 | 0.352331 |
| SETD3    | 0.019715 | 0.668278 | 0.1684   |

|          |          |          |          |
|----------|----------|----------|----------|
| TTC7B    | 0.038216 | 1.14964  | 0.234176 |
| ADCK1    | 0.589874 | 0.658372 | 0.804875 |
| ACOT1    | 0.950035 | 0.034917 | 0.990863 |
| RBM23    | 0.346648 | 0.464318 | 0.632606 |
| ISCA2    | 0.277883 | -0.20795 | 0.579677 |
| NOP9     | 0.101186 | 0.388968 | 0.361901 |
| PABPN1   | 0.057044 | 0.271565 | 0.278658 |
| METTL3   | 0.426711 | 0.4553   | 0.693599 |
| LDB1     | 0.631183 | 0.441283 | 0.830965 |
| PBRM1    | 0.044589 | 0.669748 | 0.24851  |
| YRDC     | 0.086582 | 1.22295  | 0.337307 |
| PRPF39   | 0.252375 | 0.796075 | 0.555643 |
| RPAIN    | 0.043729 | 1.310784 | 0.247494 |
| TMEM135  | 0.865777 | -0.12196 | 0.953042 |
| RSPH3    | 0.994878 | -0.03853 | 1        |
| SAPCD2   | 0.120228 | 0.684087 | 0.39497  |
| OAF      | 0.245751 | 1.141316 | 0.549743 |
| SLC9B2   | 0.079293 | 0.394712 | 0.32578  |
| ZNF546   | 0.554398 | -0.23651 | 0.783439 |
| MTDH     | 0.419078 | 0.153504 | 0.688796 |
| TLK2     | 0.016595 | 1.177302 | 0.156247 |
| TSPAN33  | 0.115315 | 0.744048 | 0.387731 |
| ABCA12   | 0.072645 | 0.763792 | 0.314729 |
| ZNF598   | 0.006253 | 0.992402 | 0.093377 |
| AGPAT6   | 0.42656  | 0.517155 | 0.693599 |
| MAGI2    | 0.755194 | 0.150909 | 0.895527 |
| RTN4RL2  | 0.964156 | 0.033899 | 0.99616  |
| KTN1     | 0.939534 | 0.059423 | 0.986498 |
| CUZD1    | 0.163438 | -0.33568 | 0.453012 |
| SMG6     | 0.077758 | 0.8694   | 0.324826 |
| NLRX1    | 0.520146 | 0.010713 | 0.760272 |
| BCL9L    | 0.262302 | 0.557099 | 0.56577  |
| PHLDB1   | 3.36E-07 | 1.218608 | 6.54E-05 |
| USP48    | 0.774166 | 0.129374 | 0.903913 |
| CADPS2   | 0.193928 | 1.068127 | 0.488275 |
| DTX2     | 0.536428 | 0.353489 | 0.773175 |
| ITIH5    | 0.113528 | -0.98991 | 0.384589 |
| STK32C   | 0.508455 | -0.25906 | 0.752448 |
| FERMT3   | 0.151386 | 0.247898 | 0.44125  |
| FAM83A   | 0.797368 | 0.321463 | 0.915298 |
| NAA40    | 0.530392 | 0.566329 | 0.768764 |
| NT5DC3   | 0.066332 | 1.317966 | 0.300895 |
| CASZ1    | 0.227857 | -0.43345 | 0.528473 |
| AACS     | 0.420398 | 0.328952 | 0.690453 |
| LUZP1    | 1.24E-05 | 1.204266 | 0.001139 |
| ALYREF   | 0.036828 | 0.308051 | 0.229759 |
| GPR180   | 0.143106 | 0.544367 | 0.430717 |
| FAM160B2 | 0.010519 | 1.206518 | 0.124644 |
| MDP1     | 0.390129 | 0.802543 | 0.66856  |
| KBTBD6   | 0.315731 | -0.27228 | 0.613139 |
| CD163    | 0.81486  | 0.142693 | 0.924847 |
| SLC25A42 | 0.545521 | 0.427901 | 0.778738 |
| MYPOP    | 0.086478 | 0.453831 | 0.337307 |
| SERINC5  | 0.074776 | -0.7223  | 0.318513 |
| LRRTM4   |          | 0        |          |
| IQGAP3   | 0.000294 | 1.775432 | 0.013997 |
| LAPTM4B  | 0.661071 | 0.137034 | 0.844596 |
| ZC3H18   | 0.876796 | 0.243547 | 0.958859 |

|          |          |          |          |
|----------|----------|----------|----------|
| VPS36    | 0.171096 | 0.175325 | 0.461822 |
| TAX1BP1  | 0.809455 | 0.110907 | 0.921586 |
| PACS2    | 0.610857 | 0.489936 | 0.818041 |
| CAND1    | 0.006642 | 0.339263 | 0.097053 |
| GLCCI1   | 0.759911 | -0.20328 | 0.897378 |
| TXNRD3   | 0.468054 | 0.25943  | 0.722799 |
| FAM134C  | 0.374984 | -0.01862 | 0.656862 |
| HOOK3    | 0.000119 | 0.595883 | 0.007233 |
| COMTD1   | 0.383925 | -0.24946 | 0.66367  |
| RTTN     | 0.282016 | -0.76071 | 0.58508  |
| SESTD1   | 0.013535 | 0.870933 | 0.141885 |
| COMMD7   | 0.674751 | 0.513478 | 0.853175 |
| TSPYL5   | 0.642073 | -0.0486  | 0.835764 |
| TMEM200A | 0.390858 | -0.65933 | 0.669566 |
| P2RY8    | 0.088468 | 0.661113 | 0.339985 |
| LRP11    | 0.945312 | 0.171569 | 0.98882  |
| SGMS1    | 0.059684 | 1.014559 | 0.285693 |
| TPRA1    | 0.411887 | 0.24489  | 0.683152 |
| AMZ2     | 0.973875 | 0.034093 | 0.998921 |
| THOC6    | 0.12841  | 0.365176 | 0.407846 |
| METTTL16 | 0.5677   | 0.573527 | 0.791838 |
| PARG     | 0.311598 | 0.508636 | 0.610372 |
| ANKRD46  | 0.006353 | 1.620736 | 0.094329 |
| PPFIBP1  | 1.61E-08 | 1.163936 | 6.25E-06 |
| BPHL     | 0.709387 | -0.17218 | 0.869179 |
| LONP2    | 0.312497 | 0.189854 | 0.610732 |
| SLC26A11 | 0.398622 | 0.511997 | 0.676088 |
| ZC3HC1   | 0.155183 | 0.212015 | 0.444958 |
| OSTM1    | 0.052539 | 1.350575 | 0.268973 |
| SBF2     | 0.093946 | 0.769533 | 0.349414 |
| RASSF3   | 0.99433  | -0.00043 | 1        |
| CHD1L    | 0.135673 | 1.031652 | 0.419268 |
| PAQR7    | 0.161533 | 0.412403 | 0.453012 |
| FCHSD1   | 0.004126 | 1.459432 | 0.07321  |
| NR2C2AP  | 0.399621 | 1.146396 | 0.67622  |
| CCDC25   | 0.289457 | 0.687084 | 0.593134 |
| PROSER2  | 0.681268 | 0.207028 | 0.856391 |
| TTC30A   | 0.311973 | 0.472003 | 0.610732 |
| LDHD     | 0.043865 | -1.27679 | 0.247494 |
| SKAP1    | 0.735989 | -0.24884 | 0.884862 |
| TMEM173  | 0.72417  | -0.01588 | 0.876654 |
| COA5     | 0.738974 | 0.178719 | 0.886253 |
| RPS19BP1 | 0.884512 | 0.014263 | 0.963599 |
| CDR2L    | 0.08214  | 1.044748 | 0.330671 |
| RALGAPB  | 0.739057 | -0.10141 | 0.886253 |
| RALGPS2  | 0.589376 | 0.221794 | 0.804624 |
| LSR      | 0.511622 | -0.4511  | 0.754376 |
| CHSY1    | 2.77E-05 | 2.063734 | 0.002167 |
| ERICH1   | 0.40774  | 0.416666 | 0.680612 |
| CARM1    | 0.017103 | 0.452019 | 0.157941 |
| NUDT13   | 0.07862  | 1.103605 | 0.32578  |
| NIT1     | 0.61848  | -0.10965 | 0.822194 |
| COMMD2   | 0.590845 | -0.42876 | 0.804875 |
| CIR1     | 0.071808 | 0.538913 | 0.313061 |
| HEATR5A  | 0.289743 | 0.215702 | 0.593134 |
| MICU3    | 0.862929 | 0.213472 | 0.951367 |
| HOGA1    | 0.163438 | -0.19783 | 0.453012 |
| NCAPG2   | 0.611382 | 0.164829 | 0.818417 |

|           |          |          |          |
|-----------|----------|----------|----------|
| PPP1R3B   | 0.319672 | -0.30801 | 0.613139 |
| C19orf68  | 0.540202 | 0.507522 | 0.775521 |
| FBXO11    | 0.10343  | 0.56594  | 0.366733 |
| SFR1      | 0.993518 | 0.011764 | 1        |
| VSIG1     | 0.315978 | 0.603882 | 0.613139 |
| ANKLE2    | 7.60E-05 | 1.756407 | 0.005016 |
| PROSER1   | 0.126827 | 0.523164 | 0.404091 |
| MEX3D     | 0.021445 | 2.097605 | 0.175496 |
| DGKH      | 0.072865 | 0.382056 | 0.315444 |
| DDX42     | 0.004071 | 0.389036 | 0.072359 |
| GKN2      | 0.22648  | -0.73151 | 0.525719 |
| TICAM2    | 0.459322 | 0.427684 | 0.716923 |
| CEP57     | 0.683396 | 0.235166 | 0.85709  |
| RNF130    | 0.00067  | 1.576327 | 0.024319 |
| TMEM219   | 0.312248 | -0.63354 | 0.610732 |
| NME9      | 0.563678 | -0.1695  | 0.789479 |
| FRAS1     | 0.736094 | 0.26793  | 0.884893 |
| SPATS2    | 0.000135 | 2.038981 | 0.007901 |
| VRK2      | 0.021765 | 0.90763  | 0.176756 |
| GPR97     | 0.783792 | -0.16985 | 0.909506 |
| CACUL1    | 0.362527 | 0.507261 | 0.646325 |
| XYLT1     | 0.006905 | 1.118619 | 0.099675 |
| NDUFA11   | 0.145824 | 0.058208 | 0.434185 |
| KRT73     | 0.082403 | 1.349186 | 0.331377 |
| DNAAF5    | 0.206534 | 0.553864 | 0.500256 |
| PTRH1     | 0.082151 | -0.78856 | 0.330671 |
| STX12     | 0.194929 | -0.14842 | 0.488911 |
| KIF18B    | 0.151349 | 0.34868  | 0.44125  |
| ECHDC2    | 0.005988 | -2.2258  | 0.090802 |
| ERO1LB    | 0.125174 | 0.570912 | 0.40136  |
| PDSS2     | 0.617939 | 0.416789 | 0.822194 |
| THNSL2    | 0.380889 | 0.354653 | 0.661698 |
| TDRP      | 0.464421 | -0.57027 | 0.721065 |
| HOMER1    | 0.781457 | -0.14135 | 0.90873  |
| DOLPP1    | 0.288469 | 0.913718 | 0.592593 |
| GATAD2A   | 0.155183 | 0.432644 | 0.444958 |
| CPNE8     | 0.053387 | 1.104644 | 0.270869 |
| GPSM1     | 0.119568 | 0.7959   | 0.394212 |
| RAB11FIP4 | 0.114023 | 1.112022 | 0.385201 |
| RAB43     | 0.520146 | 0.215484 | 0.760272 |
| C2CD5     | 0.809743 | -0.16774 | 0.921586 |
| MIB1      | 5.97E-05 | 1.293798 | 0.004192 |
| AMICA1    | 0.974393 | -0.01223 | 0.998921 |
| RASAL3    | 0.709372 | -0.37748 | 0.869179 |
| SGK223    | 0.004235 | 1.114094 | 0.074174 |
| HPS6      | 0.016217 | 1.151881 | 0.154611 |
| HRNR      | 0.096702 | 0.682359 | 0.354489 |
| KLB       | 0.024142 | -1.22445 | 0.188163 |
| DCP2      | 0.067342 | 0.754252 | 0.302148 |
| TMC8      | 1        | -0.05151 | 1        |
| IRF2BP1   | 0.145692 | 0.619171 | 0.434185 |
| CAMK1D    | 0.677728 | 0.060264 | 0.854568 |
| ABCA9     | 0.335614 | -0.17114 | 0.623082 |
| RHPN2     | 0.362148 | 0.545123 | 0.645858 |
| ERC1      | 3.59E-05 | 0.792302 | 0.00269  |
| RNF135    | 0.019732 | 1.360943 | 0.1684   |
| HIST2H2AB | 0.876815 | -0.29356 | 0.958859 |
| CBWD2     | 0.015262 | 1.254544 | 0.15168  |



|          |          |          |          |
|----------|----------|----------|----------|
| MINA     | 0.610857 | -0.30592 | 0.818041 |
| RBM45    | 0.850819 | -0.26582 | 0.944945 |
| ZDHHHC13 | 0.121792 | 1.113456 | 0.397343 |
| ZDHHHC17 | 0.218025 | 0.642228 | 0.515589 |
| CRLF3    | 0.12112  | 0.400652 | 0.396836 |
| PLXDC1   | 0.015995 | 1.26675  | 0.154257 |
| CILP2    | 4.73E-08 | 3.79704  | 1.38E-05 |
| CLEC10A  | 0.169057 | -1.17179 | 0.459676 |
| SIAH1    | 0.657906 | -0.14513 | 0.842898 |
| TRAPPC5  | 0.188199 | -0.12143 | 0.480067 |
| ARMC8    | 0.078771 | 0.408864 | 0.32578  |
| EPHX4    | 0.093078 | 0.783499 | 0.347256 |
| SPATA2L  | 0.886026 | 0.054531 | 0.96416  |
| RELL1    | 0.565049 | 0.530997 | 0.790883 |
| TMEM126B | 0.649663 | 0.342465 | 0.839222 |
| APOBEC3F | 0.694709 | 0.047024 | 0.861478 |
| AEBP1    | 2.14E-06 | 1.060966 | 0.000267 |
| EGFL6    | 0.366436 | 0.324536 | 0.649119 |
| PHYKPL   | 0.185008 | -0.7427  | 0.477255 |
| LURAP1L  | 0.629505 | 0.258007 | 0.830381 |
| TBC1D10C | 0.501359 | -0.65799 | 0.746786 |
| PLD3     | 0.343873 | 0.252494 | 0.630156 |
| LACC1    | 0.03691  | 1.139499 | 0.230114 |
| CCDC71   | 0.799868 | 0.113096 | 0.916176 |
| HID1     | 0.660905 | 0.54915  | 0.844596 |
| ANKMY2   | 0.36616  | -0.08515 | 0.649045 |
| ERI1     | 0.066692 | 1.271036 | 0.301803 |
| LYSMD2   | 0.482512 | 0.685051 | 0.73359  |
| DENND1C  | 0.025862 | 1.063448 | 0.193808 |
| PRR15    | 0.392686 | 0.604603 | 0.671013 |
| RASGRP3  | 0.94171  | 0.16714  | 0.988127 |
| VRK3     | 0.676581 | 0.322705 | 0.854081 |
| SLC9A9   | 0.692357 | 0.294908 | 0.861478 |
| LIX1L    | 0.067267 | 0.999769 | 0.302148 |
| NUDCD3   | 0.146647 | 0.702199 | 0.435709 |
| PLEKHH2  | 0.311118 | 0.216436 | 0.609894 |
| AHNAK2   | 0.003368 | 1.399035 | 0.066236 |
| FMNL3    | 0.000741 | 1.019855 | 0.025686 |
| SAMD9L   | 0.595424 | -0.0227  | 0.806337 |
| FOXP4    | 0.032589 | 1.323876 | 0.217083 |
| MMAA     | 0.641914 | -0.09754 | 0.835764 |
| MAP4K3   | 0.374999 | 0.400324 | 0.656862 |
| NOSTRIN  | 0.897609 | -0.10322 | 0.969793 |
| SLC41A1  | 0.581659 | -0.39832 | 0.797998 |
| NAV2     | 0.160242 | 0.530446 | 0.452801 |
| LEPREL1  | 0.375011 | 0.590123 | 0.656862 |
| LEPREL2  | 3.77E-11 | 2.817939 | 1.58E-07 |
| CCDC50   | 0.124233 | 0.636757 | 0.400311 |
| MUSTN1   | 0.064416 | -1.67858 | 0.296449 |
| SBSPON   | 0.266046 | -0.70811 | 0.568807 |
| FUNDC1   | 0.493028 | 0.496587 | 0.741084 |
| ZDHHHC21 | 0.421385 | 0.628243 | 0.691255 |
| MCAT     | 0.804632 | -0.40234 | 0.918848 |
| GLYCTK   | 0.651513 | 0.120931 | 0.839222 |
| MISP     | 0.576893 | 0.367114 | 0.796634 |
| KSR1     | 0.081967 | 0.610952 | 0.330671 |
| HERC6    | 0.644739 | -0.42113 | 0.837353 |
| SPNS2    | 0.40269  | -0.25638 | 0.678038 |

|          |          |          |          |
|----------|----------|----------|----------|
| C1orf210 | 0.706892 | -0.31306 | 0.869179 |
| VSTM4    | 0.246809 | 0.462594 | 0.549922 |
| CEP97    | 0.182954 | 0.642388 | 0.474175 |
| CARKD    | 0.32085  | -0.18624 | 0.613139 |
| FAM219A  | 0.083546 | 0.595781 | 0.333074 |
| GLB1L2   | 0.724261 | 0.077517 | 0.876654 |
| ARHGEF19 | 0.006855 | 0.836559 | 0.099518 |
| WDR75    | 0.208914 | 0.352988 | 0.503054 |
| MFN1     | 0.00049  | 0.764425 | 0.020212 |
| SLC44A2  | 0.623133 | -0.43721 | 0.825978 |
| ITPRIP   | 0.213374 | 0.654768 | 0.509228 |
| WDFY1    | 0.055344 | 0.281084 | 0.274516 |
| TEX2     | 0.337949 | 0.287014 | 0.625324 |
| CCDC117  | 0.72732  | 0.139999 | 0.878927 |
| FAM114A1 | 0.008743 | 0.482248 | 0.112752 |
| DCUN1D3  | 0.854217 | 0.010194 | 0.946993 |
| PLEKHM2  | 0.003214 | 1.223382 | 0.065092 |
| FOXRED2  | 0.026997 | -1.02234 | 0.198793 |
| DENND6A  | 0.181261 | 0.666241 | 0.472575 |
| MGA      | 0.371886 | 0.205778 | 0.654801 |
| GCC2     | 0.208914 | 0.456685 | 0.503054 |
| SFTPA2   | 0.035078 | -1.27222 | 0.223337 |
| SFTPA1   | 1        | -0.05852 | 1        |
| HSCB     | 0.894964 | -0.24066 | 0.968678 |
| CCDC28A  | 0.218407 | -0.65747 | 0.515816 |
| ZC3H7A   | 0.016638 | 0.919954 | 0.156319 |
| TRIM59   | 0.000516 | 2.244831 | 0.020674 |
| PHF6     | 0.939533 | 0.055017 | 0.986498 |
| ZBTB8OS  | 0.240421 | 1.512368 | 0.543631 |
| SCN4B    | 0.001084 | -1.47806 | 0.031645 |
| CUL9     | 0.035446 | 1.105423 | 0.224904 |
| LRRC8A   | 0.314435 | 0.503728 | 0.612305 |
| LMTK2    | 0.965759 | -0.33358 | 0.99616  |
| SULF2    | 0.047538 | 0.812612 | 0.256066 |
| SULF1    | 7.83E-06 | 3.018488 | 0.000797 |
| LAX1     | 0.513544 | 0.506619 | 0.75602  |
| CNTN4    | 0.589979 | -0.34594 | 0.804875 |
| UBR1     | 0.112657 | 0.439643 | 0.382523 |
| UBR2     | 0.011631 | 0.725692 | 0.129699 |
| ARHGAP12 | 0.502215 | -0.44148 | 0.747559 |
| ADHFE1   | 0.012466 | -1.3914  | 0.136352 |
| SGPP2    | 0.116516 | -1.20376 | 0.389242 |
| UNC45B   | 0.46786  | -0.22006 | 0.722799 |
| CHERP    | 0.055344 | 0.283335 | 0.274516 |
| SCUBE1   | 0.556057 | 0.128712 | 0.783439 |
| CDAN1    | 0.372948 | 0.535069 | 0.656059 |
| ANKHD1   | 0.438315 | 0.129906 | 0.701933 |
| BBS7     | 0.303188 | 0.430253 | 0.605162 |
| SUGP1    | 0.044673 | 0.906227 | 0.248727 |
| SUGP2    | 0.007779 | 0.775689 | 0.105988 |
| WWC1     | 0.034998 | -0.70732 | 0.223337 |
| UEVLD    | 0.352332 | 0.370019 | 0.637424 |
| CD302    | 0.133434 | -0.21705 | 0.416228 |
| CCAR1    | 0.550543 | 0.147888 | 0.781327 |
| HOMEZ    | 0.756615 | -0.04246 | 0.896333 |
| DHX40    | 0.850492 | -0.21953 | 0.944945 |
| MCEMP1   | 0.689485 | 0.290452 | 0.859429 |
| SCUBE3   | 0.00391  | 1.98142  | 0.071121 |

|          |          |          |          |
|----------|----------|----------|----------|
| SKA3     | 0.464202 | 0.147032 | 0.721065 |
| DNAJC10  | 0.204174 | 0.209253 | 0.497963 |
| NELFCD   | 0.992106 | 0.23629  | 1        |
| RHOT2    | 0.550543 | 0.081482 | 0.781327 |
| RHOT1    | 0.434427 | 0.027993 | 0.698194 |
| SIRT2    | 0.866426 | 0.092141 | 0.953042 |
| PHC2     | 0.213663 | 0.789858 | 0.509228 |
| GALNT12  | 0.334489 | -0.76533 | 0.621619 |
| FAM20C   | 0.872865 | -0.00867 | 0.956872 |
| MSRB3    | 0.003826 | 1.702313 | 0.070612 |
| BAP18    | 0.190424 | 0.152427 | 0.483515 |
| MRPL41   | 0.255193 | 0.354468 | 0.557593 |
| NRM      | 0.303482 | 0.297199 | 0.605491 |
| C9orf40  | 0.333111 | -0.53013 | 0.620722 |
| GPALPP1  | 0.638904 | 0.470304 | 0.834246 |
| KLHL7    | 0.033871 | 1.335097 | 0.221141 |
| PARP9    | 0.012079 | 0.540267 | 0.133041 |
| PALM2    | 0.569813 | 0.717434 | 0.793446 |
| FAM126B  | 0.525055 | -0.28876 | 0.764479 |
| RBM12B   | 0.43056  | 0.321698 | 0.695651 |
| SLC35F2  | 0.343007 | 0.629774 | 0.630156 |
| KLHDC8B  | 0.119988 | -0.53033 | 0.39497  |
| RPAP2    | 0.197201 | 0.591792 | 0.490309 |
| PNPLA6   | 0.360948 | 0.136298 | 0.644411 |
| SMC5     | 0.913281 | 0.196012 | 0.975706 |
| DDX60    | 0.866426 | -0.1179  | 0.953042 |
| CMIP     | 0.863982 | -0.03551 | 0.95196  |
| PPAPDC2  | 0.050264 | 1.344863 | 0.263221 |
| IFT20    | 0.971038 | 0.530728 | 0.997592 |
| MICALL2  | 0.003987 | 0.555968 | 0.071551 |
| SLC15A3  | 0.090029 | 0.269539 | 0.343044 |
| DHX37    | 0.047291 | 0.841949 | 0.255923 |
| C4orf19  | 0.331588 | -0.12436 | 0.619341 |
| AMN1     | 0.745146 | -0.09173 | 0.888646 |
| KBTBD2   | 0.019469 | 1.171431 | 0.16752  |
| YAF2     | 0.64451  | 0.442957 | 0.837353 |
| AMOTL1   | 0.056157 | 1.021248 | 0.276683 |
| RAVER1   | 0.038652 | 0.486373 | 0.235412 |
| FTSJ3    | 0.018368 | 0.373921 | 0.163766 |
| SLX4     | 0.762934 | -0.02948 | 0.899242 |
| TMEM192  | 0.320845 | 0.329899 | 0.613139 |
| MB21D2   | 0.182462 | 0.692483 | 0.473679 |
| SRRM1    | 0.442223 | 0.163222 | 0.703704 |
| SMAP1    | 0.350614 | 0.694963 | 0.635657 |
| DIS3L2   | 0.76398  | 0.62443  | 0.899242 |
| SUPV3L1  | 0.759058 | 0.020389 | 0.896847 |
| GSPT2    | 0.955148 | 0.048793 | 0.993074 |
| TCEB3B   | 0.678393 | -0.2052  | 0.855103 |
| ZZZ3     | 0.089856 | 0.771114 | 0.342706 |
| EXOC8    | 0.840557 | 0.031632 | 0.939212 |
| SYTL1    | 0.192599 | -0.3016  | 0.486094 |
| REM2     | 0.756763 | -0.2939  | 0.896333 |
| C1orf174 | 0.158993 | 0.570892 | 0.449897 |
| TRIM22   | 0.116444 | 0.406849 | 0.389223 |
| ZDHHC23  | 0.974393 | 0.043555 | 0.998921 |
| THNSL1   | 0.143944 | -0.52778 | 0.431666 |
| SMYD4    | 0.160642 | 0.453482 | 0.453012 |
| GRAMD1C  | 0.892148 | -0.13693 | 0.966699 |

|           |          |          |          |
|-----------|----------|----------|----------|
| PM20D2    | 0.831829 | -0.11781 | 0.935017 |
| KIAA2013  | 0.007932 | 0.588392 | 0.107292 |
| OSCAR     | 0.907098 | -0.12238 | 0.9734   |
| CMTR2     | 0.888901 | 0.11765  | 0.965603 |
| CCDC170   | 0.540465 | -0.34723 | 0.775521 |
| KATNAL2   | 0.434422 | 0.170992 | 0.698194 |
| HACE1     | 0.011869 | -1.71165 | 0.131376 |
| MICU2     | 0.266378 | 0.257207 | 0.568807 |
| RNF168    | 0.007803 | 1.064749 | 0.106183 |
| ANKRD13A  | 0.071226 | 0.427407 | 0.311134 |
| ZBED8     | 0.605305 | -0.08106 | 0.813848 |
| PHACTR4   | 0.864926 | -0.18682 | 0.952905 |
| RASEF     | 0.592958 | -0.19315 | 0.806337 |
| CHPF      | 0.076507 | 0.782931 | 0.322705 |
| TRMT2A    | 0.179234 | 0.342334 | 0.471072 |
| RPUSD2    | 0.592074 | -0.31439 | 0.806224 |
| ELMOD2    | 0.249724 | 0.158748 | 0.552833 |
| ALDH16A1  | 0.613839 | -0.05368 | 0.819264 |
| KIAA0319L | 0.832824 | 0.3525   | 0.935756 |
| RTKN2     | 0.967597 | -0.00281 | 0.997177 |
| DCP1B     | 0.175535 | 0.814555 | 0.466986 |
| SLC22A15  | 0.988991 | 0.023003 | 1        |
| SCYL3     | 0.30707  | 0.484546 | 0.608816 |
| GPR116    | 0.205247 | -0.77536 | 0.49957  |
| XRN1      | 0.003823 | 0.429234 | 0.070612 |
| UNC5B     | 8.04E-05 | 2.078046 | 0.005274 |
| MAML2     | 0.508688 | 0.061278 | 0.752448 |
| PELP1     | 0.013502 | 0.486328 | 0.141812 |
| ZDHHC14   | 0.45638  | 0.260554 | 0.714931 |
| ABI1      | 0.317645 | 0.071005 | 0.613139 |
| GPR64     | 0.559766 | 0.405271 | 0.786765 |
| WDFY3     | 0.830201 | -0.05581 | 0.933615 |
| SELH      | 0.490639 | -0.38144 | 0.738656 |
| CACNA2D3  | 0.651513 | 0.098968 | 0.839222 |
| ASPM      | 0.205178 | 0.401016 | 0.49957  |
| WDR17     | 0.252927 | -0.61067 | 0.55648  |
| CMTM8     | 0.457206 | 0.624914 | 0.715224 |
| RDH10     | 0.236413 | -0.52446 | 0.537858 |
| TNS4      | 0.292995 | 0.363553 | 0.595821 |
| ABCA7     | 0.609946 | -0.37622 | 0.817215 |
| CENPL     | 0.853023 | 0.018371 | 0.946466 |
| FAM185A   | 0.508603 | -0.4638  | 0.752448 |
| C1orf87   | 0.173804 | -0.60282 | 0.46573  |
| VKORC1L1  | 0.724167 | -0.23226 | 0.876654 |
| RBFA      | 0.686281 | -0.24929 | 0.857929 |
| LGI2      | 0.127902 | 0.492148 | 0.407164 |
| GCNT2     | 0.913093 | 0.081008 | 0.975706 |
| FUK       | 0.474191 | -0.21078 | 0.727018 |
| CLYBL     | 0.604602 | -0.28691 | 0.813002 |
| SPG20     | 0.33719  | 0.313638 | 0.624371 |
| ZNF444    | 0.57907  | -0.12701 | 0.796675 |
| SPICE1    | 0.233429 | 0.584129 | 0.535403 |
| TTC5      | 0.02811  | 1.049903 | 0.203207 |
| PUSL1     | 0.803024 | -0.21207 | 0.918848 |
| VSIG10    | 0.960709 | 0.139431 | 0.994122 |
| MIER1     | 0.186896 | 0.295399 | 0.479162 |
| CYP4X1    | 0.214398 | -1.08771 | 0.510276 |
| RPTOR     | 0.179497 | 0.152504 | 0.471072 |

|          |          |          |          |
|----------|----------|----------|----------|
| CADM3    | 0.256843 | -0.31373 | 0.560316 |
| FAM177A1 | 0.850885 | 0.219183 | 0.944945 |
| CNPY4    | 0.005543 | 0.699272 | 0.087699 |
| LGI4     | 0.693819 | 0.048667 | 0.861478 |
| CNTROB   | 0.297805 | 0.508295 | 0.601315 |
| ORMDL3   | 0.840548 | 0.103307 | 0.939212 |
| ABCA6    | 0.937537 | -0.06928 | 0.986498 |
| ADSSL1   | 0.426    | 0.739184 | 0.693599 |
| LGI3     | 1        | -0.03397 | 1        |
| LILRA2   | 0.09909  | -0.43614 | 0.358568 |
| CCAR2    | 0.004071 | 0.368078 | 0.072359 |
| NDUFAF2  | 0.779221 | 0.322078 | 0.906856 |
| SIX5     | 0.65015  | 0.11694  | 0.839222 |
| C4orf33  | 0.041971 | -1.47032 | 0.242324 |
| VPS52    | 0.871617 | 0.048839 | 0.956098 |
| NUP93    | 0.016499 | 0.288286 | 0.155558 |
| STK11IP  | 0.478274 | 0.189976 | 0.730754 |
| ZNF687   | 0.380632 | 0.382926 | 0.661698 |
| CMTR1    | 0.218632 | 0.38255  | 0.515816 |
| LRRC47   | 0.861239 | -0.03453 | 0.950165 |
| DOCK4    | 0.45805  | -0.07318 | 0.715224 |
| THEMIS   | 0.108283 | 0.694312 | 0.374055 |
| KRT78    | 0.229765 | 0.723942 | 0.529796 |
| AIM1L    | 0.740193 | 0.083436 | 0.886428 |
| CA13     | 0.220102 | -0.66125 | 0.518019 |
| SLC39A11 | 0.199513 | 0.418983 | 0.49217  |
| CFAP52   | 0.993518 | -0.01458 | 1        |
| ARHGEF28 | 0.899734 | 0.016746 | 0.971471 |
| INTS1    | 0.017103 | 0.688021 | 0.157941 |
| ARHGAP24 | 0.725603 | 0.426473 | 0.877894 |
| PROM2    | 0.392858 | 0.490509 | 0.671013 |
| ANKRD35  | 0.414362 | 0.302057 | 0.685923 |
| GAPT     | 0.756615 | -0.02021 | 0.896333 |
| VWDE     | 0.567751 | -0.21266 | 0.791838 |
| ARMC10   | 0.794443 | -0.00159 | 0.913708 |
| ZCCHC24  | 0.005831 | 1.452317 | 0.089662 |
| GHDC     | 0.14042  | -0.32299 | 0.426568 |
| PYROXD2  | 0.361303 | -0.53671 | 0.644764 |
| SYS1     | 0.539833 | 0.020145 | 0.775521 |
| ABHD12   | 0.266378 | 0.239063 | 0.568807 |
| UBE2J2   | 0.273877 | 0.685546 | 0.577625 |
| CLASRP   | 0.164137 | 0.846024 | 0.453749 |
| LTBP4    | 0.322459 | -0.20792 | 0.613498 |
| TMEM256  | 0.249013 | 1.841757 | 0.552533 |
| PQLC1    | 0.055609 | 1.472719 | 0.275585 |
| PIAS4    | 0.003308 | 1.121926 | 0.065524 |
| APITD1   | 0.6137   | 0.196607 | 0.819264 |
| CCDC23   | 0.109838 | 1.089648 | 0.377625 |
| AGGF1    | 0.00396  | 1.51971  | 0.071415 |
| MUC20    | 0.503542 | 0.238061 | 0.747828 |
| GPD1L    | 0.038652 | -0.46407 | 0.235412 |
| SLC35F6  | 0.694581 | -0.44925 | 0.861478 |
| SLC43A2  | 0.078605 | 1.32122  | 0.32578  |
| KDM8     | 0.246813 | 0.50818  | 0.549922 |
| LRRC25   | 0.44221  | 0.196381 | 0.703704 |
| ARHGAP18 | 0.062406 | 0.211332 | 0.292127 |
| TMTC2    | 0.771215 | 0.101761 | 0.903336 |
| VWA5B2   | 1        | -0.08208 | 1        |

|          |          |          |          |
|----------|----------|----------|----------|
| ASCC3    | 0.019032 | 0.416745 | 0.166597 |
| CLIP4    | 0.806555 | -0.14079 | 0.920528 |
| EHBP1L1  | 0.027821 | 0.366307 | 0.202072 |
| PLCD3    | 0.001758 | 1.59092  | 0.043911 |
| MTURN    | 0.593545 | -0.37029 | 0.806337 |
| MICALL1  | 0.362307 | 0.450803 | 0.646037 |
| TMEM130  | 0.683728 | -0.09743 | 0.85709  |
| BBS5     | 0.587009 | 0.213157 | 0.801986 |
| PPM1K    | 0.070837 | -0.9735  | 0.311134 |
| CADM2    | 0.319672 | 0.257701 | 0.613139 |
| VPS8     | 0.071226 | 0.441245 | 0.311134 |
| MPP5     | 0.734069 | 0.476318 | 0.882858 |
| STAG2    | 0.511623 | 0.085213 | 0.754376 |
| SYNPO    | 0.181644 | 0.197057 | 0.472575 |
| FNBP4    | 0.248661 | 0.163944 | 0.552243 |
| FBXW8    | 0.009374 | 1.375207 | 0.117212 |
| SDR16C5  | 0.910551 | -0.3239  | 0.975553 |
| GTPBP8   | 0.488515 | 0.437948 | 0.738428 |
| ZCCHC7   | 0.003912 | 1.447223 | 0.071121 |
| LILRB2   | 0.104956 | 1.071259 | 0.369266 |
| GALNT16  | 0.196915 | 0.365872 | 0.490309 |
| CPXM2    | 1.06E-05 | 2.978799 | 0.001006 |
| GUF1     | 0.463508 | 0.30076  | 0.720701 |
| LNX2     | 0.054852 | 0.301501 | 0.274162 |
| D2HGDH   | 0.84156  | 0.218946 | 0.940143 |
| MFSD4    | 0.184889 | -0.9931  | 0.477255 |
| SFRP1    | 0.756763 | -0.10178 | 0.896333 |
| FSTL5    | 0.141545 | 0.634066 | 0.428577 |
| RYBP     | 0.040119 | 1.015885 | 0.239354 |
| PNKD     | 0.33388  | -0.11138 | 0.620902 |
| GALNT4   | 0.960531 | 0.166683 | 0.994122 |
| FAM109A  | 0.299972 | 0.52287  | 0.602797 |
| NIN      | 0.712787 | 0.136717 | 0.871036 |
| MINK1    | 0.257225 | 0.513148 | 0.560462 |
| BPIFB2   | 0.775021 | -0.18813 | 0.904436 |
| TOMM5    | 0.660922 | -0.01358 | 0.844596 |
| TMEM55A  | 0.80715  | -0.39751 | 0.920997 |
| SLC44A3  | 0.789744 | -0.21837 | 0.911737 |
| KLHL36   | 0.64399  | -0.23683 | 0.837353 |
| HDDC3    | 0.059668 | -0.59866 | 0.285693 |
| ZADH2    | 0.376546 | -0.2929  | 0.658199 |
| CHCHD4   | 0.417181 | 0.227314 | 0.68792  |
| CCDC82   | 0.622736 | 0.083378 | 0.825978 |
| PAQR4    | 0.781907 | -0.07147 | 0.908838 |
| MARVELD2 | 0.129242 | 0.852463 | 0.409783 |
| CPA6     | 0.818427 | -0.00422 | 0.92687  |
| CBR4     | 0.018697 | -1.12236 | 0.165633 |
| MMGT1    | 0.586283 | 0.499564 | 0.801141 |
| AFAP1L2  | 0.008603 | 1.747847 | 0.111593 |
| CRACR2B  | 0.113752 | -0.90728 | 0.385112 |
| RAB42    | 0.08621  | 1.226373 | 0.336911 |
| TMEM199  | 0.923687 | -0.34407 | 0.980751 |
| FBXL6    | 0.369552 | 0.349812 | 0.652868 |
| FIBCD1   | 0.677236 | 0.020382 | 0.854325 |
| OGFOD1   | 0.126025 | 0.990623 | 0.403148 |
| ZNF276   | 0.008016 | 0.702342 | 0.107782 |
| AFAP1    | 0.000421 | 1.390255 | 0.018305 |
| MREG     | 0.737066 | -0.24799 | 0.885485 |

|            |          |          |          |
|------------|----------|----------|----------|
| ZCCHC9     | 0.52506  | 0.161903 | 0.764479 |
| DCLK2      | 0.786868 | 0.019494 | 0.911452 |
| OXR1       | 0.402184 | -0.46442 | 0.678038 |
| TTC39C     | 0.159843 | 0.570296 | 0.452018 |
| MPND       | 0.363607 | 0.346814 | 0.646996 |
| ZGPAT      | 0.039187 | 1.202566 | 0.236232 |
| CERS5      | 0.138218 | 0.810594 | 0.42406  |
| FAM26E     | 7.62E-06 | 1.199693 | 0.000783 |
| SRBD1      | 0.897652 | -0.0574  | 0.969793 |
| TAB3       | 0.902287 | -0.00738 | 0.971583 |
| WDTC1      | 0.387599 | -0.37483 | 0.666378 |
| NKAP       | 0.253699 | 1.109941 | 0.557407 |
| SMIM20     | 0.572718 | -0.46955 | 0.794481 |
| TMEM57     | 0.850164 | 0.443185 | 0.944945 |
| FAM89B     | 0.291769 | 0.304155 | 0.595183 |
| SH2D3C     | 0.337209 | -0.30819 | 0.624371 |
| ARRDC1     | 0.957272 | -0.21772 | 0.994122 |
| KCNRG      | 0.078849 | 0.792778 | 0.32578  |
| DHRX       | 0.375513 | 0.873208 | 0.657384 |
| C12orf45   | 0.928788 | 0.114433 | 0.983115 |
| FAM63A     | 0.307361 | 1.011173 | 0.609175 |
| CISD2      | 0.149515 | 0.157413 | 0.438811 |
| RPP25L     | 0.535075 | 0.450141 | 0.772522 |
| ATPAF2     | 0.769119 | -0.21789 | 0.901915 |
| TTC9C      | 0.378388 | 0.585719 | 0.659304 |
| JAGN1      | 0.417074 | 0.044587 | 0.687847 |
| MRPL50     | 0.845718 | 0.053968 | 0.942239 |
| ZC3H8      | 0.484075 | 0.163826 | 0.735071 |
| CAMKK1     | 0.992139 | -0.09426 | 1        |
| NGEF       | 0.011481 | 0.780389 | 0.129242 |
| FAM101B    | 0.87803  | 0.082459 | 0.959905 |
| EIF4E3     | 0.800044 | 0.545808 | 0.916283 |
| MSL3       | 0.70842  | 0.296439 | 0.869179 |
| PARP16     | 0.783712 | 0.282187 | 0.909506 |
| AADAT      | 0.49213  | -0.28044 | 0.740198 |
| DPP10      | 0.430232 | 0.200561 | 0.695651 |
| FAM160A2   | 0.112485 | 0.669705 | 0.382523 |
| LZTR1      | 0.502425 | 0.275283 | 0.747596 |
| COMMD1     | 0.089411 | 0.662169 | 0.341477 |
| ZBTB2      | 0.770451 | -0.22002 | 0.903284 |
| CPSF7      | 0.289748 | 0.265245 | 0.593134 |
| SLC5A8     | 0.49063  | -0.24644 | 0.738656 |
| SLC15A4    | 0.855973 | -0.23671 | 0.946993 |
| MYCT1      | 0.349744 | -0.43649 | 0.635657 |
| LILRA3     | 0.310183 | -0.40023 | 0.609864 |
| CSGALNACT2 | 0.034133 | 1.21715  | 0.221721 |
| ADAMTSL1   | 8.42E-05 | 2.346989 | 0.005462 |
| ARFGAP2    | 0.347246 | 0.294148 | 0.632606 |
| N/A        | 0.322009 | 0.148845 | 0.613139 |
| KRTCAP2    | 0.000378 | 3.020796 | 0.01699  |
| OTUD6B     | 0.023559 | 1.246095 | 0.185053 |
| FITM2      | 0.906087 | 0.021834 | 0.9734   |
| C1orf52    | 0.030204 | 0.733727 | 0.209418 |
| NATD1      | 0.666516 | -0.28524 | 0.848231 |
| CD177      | 0.399594 | 0.631601 | 0.67622  |
| METTTL25   | 0.496019 | 0.263965 | 0.743024 |
| METTTL13   | 0.003904 | 0.961637 | 0.071121 |
| ARL6IP6    | 0.572756 | 0.010532 | 0.794481 |

|          |          |          |          |
|----------|----------|----------|----------|
| ARFGAP1  | 0.260744 | 0.203412 | 0.56373  |
| SIRT6    | 0.005999 | 1.417556 | 0.090802 |
| USHBP1   | 0.440215 | -0.13587 | 0.70314  |
| PCDH20   | 0.208847 | 0.627737 | 0.503054 |
| LRRC17   | 0.0006   | 1.92505  | 0.022717 |
| ZNF655   | 0.019784 | 0.908565 | 0.1684   |
| CDKN2A   | 0.626197 | 0.312189 | 0.828579 |
| NPW      | 0.322009 | 0.197976 | 0.613139 |
| PQLC3    | 0.743478 | -0.38718 | 0.888303 |
| EMC1     | 0.12841  | 0.239833 | 0.407846 |
| PAF1     | 0.015629 | 0.643216 | 0.152856 |
| CCNYL1   | 0.371725 | 0.35902  | 0.65462  |
| BEND7    | 0.251789 | -0.5403  | 0.555643 |
| UBR7     | 0.106261 | 1.162678 | 0.370959 |
| MB21D1   | 0.631426 | 0.611331 | 0.830965 |
| ANKRD44  | 0.272095 | -0.20914 | 0.575039 |
| DDX51    | 0.08816  | 0.761662 | 0.339301 |
| PDCD7    | 0.835151 | 0.075557 | 0.935999 |
| CEP112   | 0.791168 | -0.00749 | 0.913    |
| SAMD12   | 0.966966 | 0.021794 | 0.996989 |
| C4orf32  | 0.039916 | -1.8706  | 0.23845  |
| KIAA1958 | 0.384669 | 0.243103 | 0.66413  |
| ARL10    | 0.153189 | 0.463477 | 0.443165 |
| PTGR2    | 0.09047  | -0.1484  | 0.343901 |
| COX18    | 0.538071 | 0.516295 | 0.773967 |
| NIPA2    | 0.079293 | 0.29646  | 0.32578  |
| SLC25A29 | 0.774926 | 0.142287 | 0.904436 |
| C2orf69  | 0.613804 | -0.39658 | 0.819264 |
| ARL14EP  | 0.051109 | 1.34409  | 0.265139 |
| ENAH     | 0.019371 | 0.528717 | 0.167192 |
| BMPER    | 0.134221 | -0.71912 | 0.417223 |
| GBP7     | 0.641486 | 0.143478 | 0.835764 |
| ATP6V0D2 | 0.981558 | 0.547097 | 1        |
| DCBLD1   | 0.482211 | 0.219579 | 0.733586 |
| GPATCH11 | 0.039302 | 0.97595  | 0.236259 |
| CEP120   | 0.154964 | -0.67407 | 0.444958 |
| ABTB2    | 0.052564 | -0.72436 | 0.268973 |
| MRPL43   | 0.033942 | 0.954923 | 0.221141 |
| NECAB1   | 0.57907  | -0.16981 | 0.796675 |
| C12orf29 | 0.15142  | 1.051621 | 0.44125  |
| CNEP1R1  | 0.036574 | 2.022259 | 0.229306 |
| JMY      | 0.390386 | 0.380385 | 0.668898 |
| GDPD1    | 0.403464 | -0.46436 | 0.678271 |
| SYT2     | 0.58881  | 0.322308 | 0.80405  |
| FADS6    | 0.169846 | -0.36605 | 0.461029 |
| DTX3     | 0.099814 | 0.844745 | 0.359216 |
| ACOT4    | 0.425854 | 0.476366 | 0.693599 |
| C19orf47 | 0.005152 | 1.822806 | 0.084152 |
| TMEM102  | 0.197863 | 0.722794 | 0.491413 |
| ASCC1    | 0.719216 | -0.31561 | 0.874478 |
| BANP     | 0.491632 | 0.400543 | 0.739769 |
| LRRC57   | 0.277896 | -0.24707 | 0.579677 |
| EIF1AD   | 0.755386 | -0.22034 | 0.895563 |
| SCAI     | 0.938984 | -0.04128 | 0.986498 |
| KRI1     | 0.327317 | 0.63806  | 0.617719 |
| TC2N     | 0.010795 | -1.8512  | 0.126291 |
| WDSUB1   | 0.898276 | 0.006977 | 0.970275 |
| CCDC71L  | 0.960481 | -0.09287 | 0.994122 |



|          |          |          |          |
|----------|----------|----------|----------|
| MFSD2A   | 0.192968 | -0.35387 | 0.486632 |
| POC5     | 0.047752 | 0.988041 | 0.256846 |
| ZNF579   | 0.845762 | -0.08245 | 0.942239 |
| FAM73A   | 0.055662 | 0.658401 | 0.275603 |
| ZBTB38   | 0.838142 | 0.044061 | 0.938499 |
| POMGNT2  | 0.798506 | -0.21831 | 0.916173 |
| PRPF38A  | 0.025563 | 0.396498 | 0.193268 |
| KDF1     | 0.317121 | -0.53802 | 0.613139 |
| USP38    | 0.455711 | 0.157142 | 0.714286 |
| ZNF511   | 0.970786 | -0.0098  | 0.997592 |
| MLKL     | 0.333853 | 0.521798 | 0.620902 |
| PDDC1    | 0.199511 | -0.66263 | 0.49217  |
| ANKRD52  | 0.258033 | 0.486407 | 0.560487 |
| ATP11C   | 0.162803 | 0.46606  | 0.453012 |
| KDM1B    | 0.004306 | 1.334547 | 0.075057 |
| SPATA5   | 0.528742 | -0.14248 | 0.767576 |
| DTWD2    | 0.691948 | 0.199614 | 0.861227 |
| NHLRC2   | 0.181644 | 0.286421 | 0.472575 |
| AVL9     | 0.636678 | 0.571927 | 0.833511 |
| SLC43A3  | 0.671782 | -0.28185 | 0.851286 |
| XXYLT1   | 2.60E-05 | 2.676883 | 0.002074 |
| GOLM1    | 0.274985 | 0.328643 | 0.577625 |
| COLGALT1 | 8.89E-06 | 0.714185 | 0.000881 |
| SUMF2    | 0.151386 | -0.26407 | 0.44125  |
| SIDT2    | 0.068007 | 1.156048 | 0.303928 |
| SUMF1    | 0.010038 | 0.956003 | 0.12115  |
| POGLUT1  | 0.382126 | 0.377854 | 0.661698 |
| UBAC2    | 0.117194 | 0.277127 | 0.389929 |
| PCYOX1L  | 0.157086 | 0.79207  | 0.447022 |
| TMEM87A  | 0.059675 | 0.316123 | 0.285693 |
| RDH13    | 0.892438 | 0.055841 | 0.966699 |
| TTC13    | 0.01925  | 1.341709 | 0.167058 |
| MFSD9    | 0.147665 | 0.840742 | 0.436386 |
| PCSK9    | 0.402634 | 0.561638 | 0.678038 |
| HSD17B11 | 0.305036 | -0.18198 | 0.606083 |
| FAM63B   | 0.019336 | 1.2967   | 0.167192 |
| SLC4A11  | 0.393617 | 0.187472 | 0.671013 |
| TXNDC5   | 0.434427 | 0.153215 | 0.698194 |
| POC1A    | 0.078721 | 0.651031 | 0.32578  |
| SPC24    | 0.031114 | 1.652366 | 0.212999 |
| ATAD1    | 0.950035 | 0.00023  | 0.990863 |
| SLC38A9  | 0.509993 | 0.487561 | 0.753775 |
| SCCPDH   | 0.09982  | 0.343915 | 0.359216 |
| INO80E   | 0.270854 | 0.593124 | 0.574167 |
| UXS1     | 0.411524 | 0.246698 | 0.683152 |
| CLEC1A   |          | 0        |          |
| ACBD4    | 0.08528  | -0.46961 | 0.335537 |
| RNF149   | 0.107682 | 0.886911 | 0.373221 |
| FAM134A  | 0.028284 | 0.921787 | 0.203235 |
| SERBP1   | 0.048208 | 0.325358 | 0.257798 |
| KCT2     | 0.006708 | 1.993899 | 0.097888 |
| LEMD2    | 0.044589 | 0.28762  | 0.24851  |
| NOA1     | 0.050897 | 1.078815 | 0.264901 |
| RBBP8NL  | 0.780512 | -0.20895 | 0.907977 |
| NECAP1   | 0.936896 | -0.37653 | 0.986451 |
| FAM98A   | 0.000119 | 0.666456 | 0.007233 |
| ZNF784   | 0.384669 | -0.31678 | 0.66413  |
| PLA2G15  | 0.025773 | 1.165808 | 0.193808 |

|           |          |          |          |
|-----------|----------|----------|----------|
| TSEN2     | 0.8147   | -0.00462 | 0.924847 |
| MTMR14    | 0.00517  | 1.222514 | 0.084325 |
| NFATC2IP  | 0.080765 | 1.090695 | 0.32836  |
| CHST4     | 0.57907  | -0.16142 | 0.796675 |
| DAGLB     | 0.759058 | -0.01497 | 0.896847 |
| CHST14    | 0.000768 | 1.031041 | 0.026134 |
| SPRYD3    | 0.124316 | 0.91746  | 0.400461 |
| GALNT6    | 0.158635 | 0.895099 | 0.449897 |
| APCDD1L   | 0.960709 | 0.125827 | 0.994122 |
| DYNC2H1   | 0.565508 | 0.318993 | 0.79107  |
| RNF169    | 0.250602 | 0.501205 | 0.554113 |
| PDPR      | 0.067188 | 0.337515 | 0.302058 |
| ZBTB44    | 0.632486 | -0.16394 | 0.830965 |
| ZMYM6NB   | 0.92213  | -0.03749 | 0.980751 |
| APOA1BP   | 0.274985 | 0.251345 | 0.577625 |
| GALNT11   | 0.766238 | 0.158695 | 0.90149  |
| MSANTD4   | 0.322009 | 0.11186  | 0.613139 |
| SMG8      | 0.002544 | 1.338411 | 0.055387 |
| RNF214    | 0.314415 | 0.441179 | 0.612305 |
| ZNRF1     | 0.015471 | 0.794641 | 0.152523 |
| PPFIBP2   | 0.923803 | 0.114781 | 0.980751 |
| LSM14A    | 0.002438 | 0.796805 | 0.053762 |
| GIMAP8    | 0.513707 | 0.292125 | 0.756141 |
| CCNY      | 0.002185 | 0.824983 | 0.049962 |
| ZNF280C   | 0.565716 | 0.433047 | 0.79107  |
| PNMA1     | 0.001614 | 1.541378 | 0.041532 |
| LRRN4CL   | 0.09909  | 0.537193 | 0.358568 |
| HMCN2     | 0.448385 | -0.48777 | 0.708512 |
| MROH1     | 0.266378 | -0.39111 | 0.568807 |
| BANK1     | 0.553176 | 0.231845 | 0.783439 |
| MAPK1IP1L | 0.346163 | 0.926758 | 0.632606 |
| PAPD5     | 0.23975  | 0.594507 | 0.542335 |
| NPEPL1    | 0.97632  | -0.03702 | 0.998921 |
| EHBP1     | 0.037014 | 1.100482 | 0.230501 |
| RCBTB1    | 0.229605 | 0.670854 | 0.529537 |
| RBM15B    | 0.246548 | 0.607867 | 0.549922 |
| SMC1B     | 0.936875 | -0.09344 | 0.986451 |
| PSD4      | 0.407931 | 0.770275 | 0.680763 |
| PHC3      | 0.274695 | 0.455689 | 0.577625 |
| ZNF740    | 0.504878 | -0.3815  | 0.749411 |
| C3orf58   | 0.154934 | 0.79462  | 0.444958 |
| TMEM161B  | 0.708208 | -0.22791 | 0.869179 |
| TMEM104   | 0.472079 | 0.437527 | 0.726492 |
| CNNM3     | 0.784284 | -0.27194 | 0.909506 |
| SETD9     | 0.533465 | -0.22907 | 0.7709   |
| FAM13C    | 0.571349 | 0.068554 | 0.793891 |
| CPEB3     | 0.041397 | 0.424428 | 0.240826 |
| CHDH      | 0.263505 | -0.70312 | 0.565873 |
| ABCF1     | 0.392997 | 0.099885 | 0.671013 |
| MCU       | 0.317645 | 0.247302 | 0.613139 |
| PIK3C3    | 0.226131 | 0.273244 | 0.525131 |
| GSTCD     | 0.784922 | -0.14505 | 0.909863 |
| SRFBP1    | 0.336548 | 0.436896 | 0.624085 |
| C7orf57   | 0.331588 | -0.05914 | 0.619341 |
| FAM83F    | 0.971656 | 0.004119 | 0.997592 |
| NGDN      | 0.134442 | 0.876128 | 0.417765 |
| DDHD1     | 0.233808 | 0.557008 | 0.535403 |
| SHCBP1    | 0.686102 | -0.02496 | 0.857929 |

|          |          |          |          |
|----------|----------|----------|----------|
| SUPT20H  | 0.00102  | 1.438153 | 0.03092  |
| PDZD8    | 0.350038 | 0.619941 | 0.635657 |
| C1orf162 |          | 0        |          |
| LFNG     | 0.274366 | 0.883124 | 0.577625 |
| NFAM1    | 0.137489 | 0.50075  | 0.422524 |
| CHST13   | 0.540968 | 0.161238 | 0.775521 |
| APPL2    | 0.005006 | 0.584326 | 0.082994 |
| EXPH5    | 0.365071 | -0.46573 | 0.64784  |
| SLC30A7  | 0.434427 | 0.204509 | 0.698194 |
| NAV1     | 0.019074 | 1.254643 | 0.166801 |
| ATP6V1C2 | 0.232298 | -0.71269 | 0.53408  |
| PPHLN1   | 0.387654 | 0.923931 | 0.666378 |
| VPS37A   | 0.079871 | 0.603898 | 0.325919 |
| WDR19    | 0.752017 | -0.19104 | 0.893287 |
| KMT2C    | 0.70592  | -0.42639 | 0.868525 |
| FBXO22   | 0.312831 | 0.470345 | 0.610954 |
| LPCAT1   | 0.244338 | -0.36999 | 0.547425 |
| DOCK8    | 0.407778 | 0.047193 | 0.680612 |
| ZMIZ2    | 0.879142 | 0.070797 | 0.961025 |
| SYNE1    | 0.426712 | 0.175024 | 0.693599 |
| ZNF397   | 0.741994 | -0.24614 | 0.887847 |
| USP32    | 0.045446 | 0.972577 | 0.250872 |
| BOD1L1   | 0.277869 | 0.729023 | 0.579677 |
| ARID1B   | 0.173167 | 0.432041 | 0.464476 |
| FLAD1    | 0.003904 | 0.56248  | 0.071121 |
| FLCN     | 0.287054 | 0.665412 | 0.590535 |
| NUP43    | 0.175259 | 0.229348 | 0.466796 |
| NUP37    | 0.126762 | 0.188502 | 0.403998 |
| NUP35    | 0.233812 | 0.211089 | 0.535403 |
| REPS2    | 0.757084 | -0.16818 | 0.896521 |
| ENGASE   | 0.87149  | -0.20246 | 0.956098 |
| GPRC5A   | 0.136774 | -1.14026 | 0.421544 |
| BBS1     | 0.332803 | 0.46687  | 0.62046  |
| B3GNT7   | 0.368126 | 0.515297 | 0.650971 |
| ADCY4    | 0.833005 | 0.02975  | 0.935865 |
| NBEA     | 0.969774 | -0.01424 | 0.997592 |
| TOR1AIP2 | 0.197211 | 0.241972 | 0.490309 |
| STEAP2   | 0.005723 | 1.77324  | 0.089283 |
| DNER     | 0.331588 | -0.12904 | 0.619341 |
| TSTD1    | 0.016203 | -0.85609 | 0.154611 |
| ABHD11   | 0.147661 | -0.43515 | 0.436386 |
| COL22A1  | 0.278824 | 0.245454 | 0.581068 |
| CMAS     | 0.144006 | 0.239187 | 0.431666 |
| MYRIP    | 0.49063  | 0.140972 | 0.738656 |
| STXBP6   | 0.542041 | -0.34008 | 0.775521 |
| FBXO18   | 0.321966 | 0.347047 | 0.613139 |
| NLGN2    | 0.041852 | 0.650321 | 0.242066 |
| TNIP2    | 0.470605 | 0.242591 | 0.725029 |
| CADM4    | 0.440265 | 0.481727 | 0.70314  |
| HELB     | 0.366436 | 0.291499 | 0.649119 |
| TSPAN14  | 0.035651 | -0.79068 | 0.225452 |
| TTL      | 0.546205 | 0.198673 | 0.778738 |
| OR4A5    | 0.291769 | 0.307408 | 0.595183 |
| SVIP     | 0.324609 | 0.93884  | 0.61511  |
| ZNRF2    | 0.787688 | 0.188594 | 0.911483 |
| ATL2     | 0.779221 | -0.07575 | 0.906856 |
| LILRB4   | 0.375995 | 0.687871 | 0.657546 |
| LILRB1   | 0.483269 | 0.479561 | 0.73454  |

|                                          |          |          |          |
|------------------------------------------|----------|----------|----------|
| KDM2B                                    | 0.364616 | -0.45807 | 0.647136 |
| MOSPD2                                   | 0.015071 | 0.754379 | 0.150049 |
| PLBD2                                    | 0.181644 | 0.337898 | 0.472575 |
| RASSF8                                   | 0.229479 | -0.52364 | 0.529537 |
| DDX55                                    | 0.475812 | 0.312709 | 0.728899 |
| MFSD8                                    | 0.353607 | 0.573242 | 0.638094 |
| CT45A3;CT45A1;CT45A2;CT45A9;CT45A8;CT45A | 0.156489 | 0.684424 | 0.44698  |
| SGMS2                                    | 0.055868 | 0.820977 | 0.276127 |
| TDRD7                                    | 0.010209 | 1.273091 | 0.121876 |
| GIMAP7                                   | 0.206057 | 0.276887 | 0.500256 |
| NEDD1                                    | 0.246532 | 0.445418 | 0.549922 |
| RHOXF1                                   | 0.988991 | 0.05158  | 1        |
| TPCN2                                    | 0.911233 | -0.08854 | 0.975706 |
| RFWD2                                    | 0.17207  | 0.643145 | 0.463435 |
| GAS2L2                                   | 0.244375 | -0.37817 | 0.547425 |
| CDC26                                    | 0.4976   | -0.14948 | 0.744587 |
| NCOA7                                    | 0.015851 | 0.842233 | 0.153751 |
| MCFD2                                    | 0.003823 | 0.782444 | 0.070612 |
| THOC2                                    | 0.072266 | 0.285799 | 0.313701 |
| INADL                                    | 0.733279 | 0.38166  | 0.882858 |
| WDR36                                    | 0.537409 | 0.109755 | 0.773175 |
| PPTC7                                    | 0.957804 | 0.449602 | 0.994122 |
| ADCK3                                    | 0.081043 | -0.50805 | 0.328405 |
| ANGPTL6                                  | 0.31899  | 0.240638 | 0.613139 |
| RP9                                      | 0.25363  | 0.654885 | 0.557407 |
| GRPEL2                                   | 0.014387 | 1.226614 | 0.14653  |
| VANGL1                                   | 0.203001 | 0.500617 | 0.497346 |
| IL17D                                    | 0.68021  | -0.42647 | 0.85545  |
| SLC30A5                                  | 0.32407  | 0.044412 | 0.614309 |
| OCC1                                     | 0.677236 | 0.059153 | 0.854325 |
| SNIP1                                    | 0.074916 | 0.654545 | 0.318717 |
| PPP1R14C                                 | 0.500641 | 0.486011 | 0.746418 |
| GADD45GIP1                               | 0.554864 | -0.20626 | 0.783439 |
| WDR48                                    | 0.913333 | 0.218873 | 0.975706 |
| EXOC6                                    | 1        | 0.0175   | 1        |
| FIBIN                                    | 0.000141 | 2.499232 | 0.008147 |
| TTC8                                     | 0.553754 | 0.304706 | 0.783439 |
| CEP76                                    | 0.393617 | 0.229511 | 0.671013 |
| MPLKIP                                   | 0.300882 | 0.288812 | 0.602797 |
| SMARCC2                                  | 0.18381  | 0.160021 | 0.474829 |
| ZNF420                                   | 0.655601 | -0.61076 | 0.84209  |
| NPLOC4                                   | 0.003228 | 0.408551 | 0.065092 |
| FAM76A                                   | 0.464202 | 0.2609   | 0.721065 |
| GSDMB                                    | 0.584957 | -0.36452 | 0.801141 |
| CXorf38                                  | 0.133743 | 0.804267 | 0.416228 |
| UBALD1                                   | 0.079293 | 0.435895 | 0.32578  |
| SPATA20                                  | 0.577274 | -0.1359  | 0.796634 |
| RIN3                                     | 0.233092 | 0.372367 | 0.535403 |
| GDAP1                                    | 0.440222 | 0.759986 | 0.70314  |
| NUBPL                                    | 0.029203 | -1.10476 | 0.20681  |
| ABHD4                                    | 0.029665 | 1.042973 | 0.208169 |
| DEPTOR                                   | 0.153028 | 0.956929 | 0.443165 |
| FBXO30                                   | 0.71164  | 0.157561 | 0.870161 |
| SLC35B2                                  | 0.442223 | 0.172452 | 0.703704 |
| PUM2                                     | 0.02974  | 0.38363  | 0.208169 |
| NDNF                                     | 0.277353 | -0.70038 | 0.579677 |
| ITFG1                                    | 0.306581 | 0.006426 | 0.608171 |
| GOLGA5                                   | 0.422885 | 0.304739 | 0.691467 |

|          |          |          |          |
|----------|----------|----------|----------|
| KLHDC4   | 0.848301 | 0.031373 | 0.944084 |
| SHKBP1   | 0.261242 | 0.570605 | 0.564363 |
| UBA3     | 0.151386 | 0.172981 | 0.44125  |
| ZSCAN18  | 0.277055 | 0.661729 | 0.579677 |
| BAHD1    | 0.992139 | 0.00371  | 1        |
| CNIH3    | 0.041397 | 0.65098  | 0.240826 |
| NANP     | 0.111092 | 1.233133 | 0.380668 |
| FAM213B  | 0.81485  | 0.515842 | 0.924847 |
| ZCRB1    | 0.211425 | 0.911695 | 0.50679  |
| PIGX     | 0.042516 | 1.440475 | 0.243142 |
| ZCCHC10  | 0.29846  | 0.713695 | 0.601676 |
| TMEM254  | 0.60794  | 0.283987 | 0.816529 |
| DNAJB14  | 0.043652 | 1.569698 | 0.247494 |
| RAB3IL1  | 6.43E-06 | 2.944566 | 0.000679 |
| FAM174A  | 0.442014 | -0.83292 | 0.703704 |
| SLC25A40 | 0.000363 | 1.740615 | 0.016492 |
| TMEM167A | 0.183806 | 0.384397 | 0.474829 |
| FAM57A   | 0.066541 | 1.384587 | 0.301718 |
| PIP4K2C  | 0.101186 | 0.287592 | 0.361901 |
| WDR20    | 0.034562 | 1.18543  | 0.222216 |
| TRMT10A  | 0.977916 | -0.00066 | 1        |
| MDM1     | 0.804685 | 0.036757 | 0.918848 |
| TBC1D15  | 0.077655 | 0.3399   | 0.324641 |
| RDH11    | 0.112657 | 0.162626 | 0.382523 |
| TMEM163  | 0.021073 | -1.96146 | 0.173882 |
| POC1B    | 0.925299 | 0.191028 | 0.981917 |
| SPATA18  | 0.132454 | -1.04585 | 0.414867 |
| FAM110B  | 0.163438 | -0.21512 | 0.453012 |
| LRRC20   | 0.424179 | -0.41665 | 0.693173 |
| IFI44    | 0.597324 | 0.663202 | 0.808212 |
| MRPL30   | 0.169494 | 1.478042 | 0.460637 |
| C18orf32 | 0.894301 | -0.38127 | 0.968527 |
| NT5C     | 1        | -0.01223 | 1        |
| FAM45A   | 0.314461 | 0.155541 | 0.612305 |
| ZFAND1   | 0.216679 | 0.798826 | 0.513611 |
| KIAA1524 | 0.40433  | -0.60027 | 0.678624 |
| PI4K2B   | 0.146904 | 0.950885 | 0.436111 |
| CPT1C    | 0.319672 | 0.203723 | 0.613139 |
| STT3B    | 0.043207 | 0.258542 | 0.246126 |
| PNPT1    | 0.71923  | 0.08842  | 0.874478 |
| SPPL3    | 0.039604 | 0.856092 | 0.237431 |
| SPPL2B   | 0.034876 | 1.210057 | 0.223337 |
| SPPL2A   | 0.687417 | 0.150352 | 0.858864 |
| HM13     | 0.01039  | 0.415756 | 0.123374 |
| PREX1    | 0.249711 | 0.321578 | 0.552833 |
| DYNC2LI1 | 0.911648 | -0.12162 | 0.975706 |
| URGCP    | 0.137857 | 0.69046  | 0.423394 |
| CD99L2   | 0.001675 | 2.125239 | 0.042312 |
| AGR3     | 0.043891 | -1.33629 | 0.247494 |
| MIPOL1   | 0.834322 | 0.048189 | 0.935999 |
| BICD2    | 0.064284 | 0.316976 | 0.296208 |
| NEK9     | 0.286754 | 0.233707 | 0.590053 |
| SFXN5    | 0.565508 | 0.406598 | 0.79107  |
| CHD6     | 0.690161 | -0.02356 | 0.859679 |
| GPT2     | 0.727595 | 0.354316 | 0.879154 |
| TRPM4    | 0.220749 | 0.797351 | 0.519064 |
| CD200R1  | 0.553889 | -0.26632 | 0.783439 |
| PLEKHO2  | 0.627809 | 0.064081 | 0.828932 |

|             |          |          |          |
|-------------|----------|----------|----------|
| MGARP       | 0.404702 | 0.422392 | 0.67885  |
| DTX3L       | 0.004424 | 0.573636 | 0.076312 |
| DDX54       | 0.711836 | 0.373754 | 0.870161 |
| RASGRP4     | 0.183878 | 0.248744 | 0.474829 |
| BLOC1S5     | 0.931664 | -0.42814 | 0.984157 |
| DMXL2       | 0.033947 | 0.564592 | 0.221141 |
| BPIFB1      | 0.822496 | 0.212996 | 0.92929  |
| DLG5        | 0.788765 | -0.26995 | 0.911483 |
| CABLES1     | 0.077529 | -0.87998 | 0.324641 |
| BRIX1       | 0.81486  | 0.066616 | 0.924847 |
| RNASEH2C    | 0.486487 | 0.360223 | 0.73612  |
| HAVCR2      | 0.448456 | 0.322587 | 0.708523 |
| CD300LF     | 0.17518  | -0.89049 | 0.466796 |
| GNPDA2      | 0.056188 | 0.42002  | 0.276683 |
| TRAF3IP1    | 0.766633 | -0.01726 | 0.901859 |
| STK35       | 0.472922 | -0.23    | 0.727018 |
| HCAR2;HCAR3 | 0.594656 | -0.08301 | 0.806337 |
| LRRC8C      | 0.144006 | 0.297163 | 0.431666 |
| SYTL5       | 0.435027 | 0.698968 | 0.699055 |
| CSGALNACT1  | 0.005734 | 0.71284  | 0.089283 |
| NEK7        | 0.327323 | 0.210523 | 0.617719 |
| RB1CC1      | 0.952651 | 0.438486 | 0.993074 |
| ASAP3       | 0.044061 | 1.227394 | 0.248311 |
| MICAL1      | 0.109698 | 0.31018  | 0.377423 |
| ELP5        | 0.162483 | 0.774079 | 0.453012 |
| ADAMTS16    | 0.011417 | 1.590108 | 0.128971 |
| EPS8L3      | 0.69426  | 0.074147 | 0.861478 |
| EPS8L1      | 0.58819  | 0.424429 | 0.803499 |
| DNAH5       | 0.578778 | -0.3738  | 0.796675 |
| SSH3        | 0.54177  | -0.18041 | 0.775521 |
| SH3TC1      | 0.509154 | 0.224105 | 0.753038 |
| PXYLP1      | 0.025791 | 0.83667  | 0.193808 |
| NSUN6       | 0.431183 | 0.308573 | 0.696172 |
| TBCK        | 0.012485 | 0.849035 | 0.136424 |
| DTD1        | 0.80459  | 0.099492 | 0.918848 |
| DCAF11      | 0.928935 | 0.055546 | 0.983115 |
| RHBDD1      | 0.336105 | 0.384335 | 0.623617 |
| UTP15       | 0.028293 | 0.503596 | 0.203235 |
| GPX8        | 2.95E-08 | 2.143237 | 8.86E-06 |
| SLC37A2     | 0.304818 | 0.615583 | 0.606083 |
| AFAP1L1     | 0.076764 | 1.04837  | 0.323352 |
| DENND1A     | 0.098827 | 0.791106 | 0.358568 |
| SH3RF3      | 0.251789 | 0.322865 | 0.555643 |
| TRPC4AP     | 0.961101 | 0.018148 | 0.99427  |
| NUP210      | 0.121915 | 0.241722 | 0.397343 |
| CEP192      | 0.502425 | 0.057072 | 0.747596 |
| SNX29       | 0.232345 | 0.502877 | 0.53408  |
| GEMIN5      | 0.714303 | 0.130283 | 0.87164  |
| PIGO        | 0.314461 | -0.47703 | 0.612305 |
| SNED1       | 0.080271 | 1.03599  | 0.326832 |
| ARHGEF40    | 0.001183 | 1.077918 | 0.03367  |
| FBF1        | 0.140267 | -0.53331 | 0.426568 |
| GANC        | 0.525098 | -0.35332 | 0.764479 |
| RAPGEF6     | 0.499503 | 0.469714 | 0.745391 |
| SMCR8       | 0.110282 | 0.742452 | 0.378797 |
| PARD3       | 0.120246 | 0.696078 | 0.39497  |
| PARD3B      | 0.905154 | 0.019717 | 0.972966 |
| IPO4        | 0.330591 | 0.233988 | 0.619341 |

|          |          |          |          |
|----------|----------|----------|----------|
| CREB3L4  | 0.632486 | -0.21085 | 0.830965 |
| USP33    | 0.132233 | 0.740385 | 0.414428 |
| PNISR    | 0.275372 | 0.809679 | 0.578109 |
| PPP4R1   | 0.185984 | 0.268808 | 0.478129 |
| DYNLRB2  | 0.08528  | -0.38065 | 0.335537 |
| WHAMM    | 0.122914 | 0.849853 | 0.399191 |
| UBASH3B  | 0.983649 | -0.05293 | 1        |
| DIS3L    | 0.971687 | 0.047298 | 0.997592 |
| ZFP90    | 0.041397 | 0.271403 | 0.240826 |
| ATP8B4   | 0.932592 | -0.13175 | 0.984157 |
| GIPC3    | 0.565156 | 0.269862 | 0.790933 |
| GIPC2    | 0.972044 | -0.02259 | 0.997865 |
| LRRC15   | 1.29E-09 | 5.314223 | 1.33E-06 |
| ZNF384   | 0.568169 | 0.563709 | 0.791838 |
| SLC16A10 | 0.293533 | 0.384259 | 0.596247 |
| SHROOM3  | 0.256545 | 0.983133 | 0.560028 |
| WIPF2    | 0.892331 | -0.28255 | 0.966699 |
| ABHD5    | 0.088104 | 0.961383 | 0.339301 |
| SETD7    | 0.088174 | 0.257267 | 0.339301 |
| NOC3L    | 0.680143 | 0.129293 | 0.85545  |
| SCARB1   | 0.282463 | 0.752338 | 0.58557  |
| COG1     | 0.002438 | 0.69611  | 0.053762 |
| NPRL2    | 0.361802 | 0.334383 | 0.645551 |
| GATSL3   | 0.374495 | 0.605496 | 0.656862 |
| GLYATL2  | 0.467577 | 0.384194 | 0.722799 |
| STK32A   | 0.133765 | 0.582173 | 0.416228 |
| PYROXD1  | 0.123482 | 0.779568 | 0.399387 |
| RNF139   | 0.0174   | 1.171128 | 0.159467 |
| FRS2     | 0.346277 | 0.197113 | 0.632606 |
| MZB1     | 0.550543 | 0.013218 | 0.781327 |
| ABHD3    | 0.090401 | 1.295138 | 0.343901 |
| SCFD2    | 0.171096 | 0.326347 | 0.461822 |
| SMAP2    | 0.856059 | -0.049   | 0.946993 |
| ZC3H15   | 0.260744 | 0.266152 | 0.56373  |
| PPIL4    | 0.006642 | 0.828294 | 0.097053 |
| GTF3C2   | 0.041202 | 0.665938 | 0.240826 |
| TBC1D22A | 0.585477 | 0.46059  | 0.801141 |
| TSKU     | 0.526694 | 0.459899 | 0.766252 |
| PHF10    | 0.000302 | 2.256194 | 0.014322 |
| RAB2B    | 0.094502 | 0.549538 | 0.349959 |
| CCDC12   | 0.345556 | -0.26736 | 0.632227 |
| CHPT1    | 0.831352 | -0.07122 | 0.934576 |
| PPP1R13L | 6.86E-05 | 1.334061 | 0.004699 |
| FAM172A  | 0.632495 | 0.341449 | 0.830965 |
| SLC22A17 | 0.178261 | 0.348808 | 0.469506 |
| CHURC1   | 0.418622 | 0.462837 | 0.688796 |
| TGFBRAP1 | 0.082197 | 0.092763 | 0.330671 |
| TMEM263  | 0.249719 | 0.396347 | 0.552833 |
| HDAC7    | 0.001217 | 1.836133 | 0.034268 |
| STYX     | 0.721234 | 0.211109 | 0.876242 |
| CYB5D2   | 1        | -0.05683 | 1        |
| CEMIP    | 0.000349 | 1.973954 | 0.016013 |
| PTPMT1   | 0.133452 | 0.771965 | 0.416228 |
| NUP133   | 0.118765 | 0.257859 | 0.392409 |
| PDCD6IP  | 0.794443 | 0.021401 | 0.913708 |
| SLC20A1  | 0.121075 | 0.508893 | 0.396833 |
| UBTD2    | 0.070152 | 1.515516 | 0.309184 |
| FBLIM1   | 2.39E-05 | 1.145498 | 0.001947 |

|           |          |          |          |
|-----------|----------|----------|----------|
| CACTIN    | 0.090871 | 0.964914 | 0.344564 |
| LRRN4     | 0.197046 | 0.879743 | 0.490309 |
| GATAD1    | 0.304902 | 0.797982 | 0.606083 |
| BRK1      | 0.38573  | -0.1796  | 0.664306 |
| CHAC2     | 0.446152 | 0.453685 | 0.706795 |
| CHMP7     | 0.055419 | 1.261559 | 0.274767 |
| THEM6     | 0.861239 | 0.0207   | 0.950165 |
| PRUNE2    | 0.871162 | -0.19719 | 0.956098 |
| NAT14     | 0.014642 | 1.402082 | 0.148033 |
| BCL7C     | 0.484092 | -0.95858 | 0.735071 |
| ORAOV1    | 0.768139 | -0.03363 | 0.901915 |
| SFT2D1    | 0.902991 | -0.08417 | 0.971583 |
| NSMCE1    | 0.455535 | 0.318952 | 0.71417  |
| PHLDA1    | 0.452011 | 0.438985 | 0.712009 |
| BLNK      | 0.367089 | 0.429452 | 0.649965 |
| SNX33     | 0.183798 | 0.833844 | 0.474829 |
| TRIM41    | 0.298086 | -0.35778 | 0.601676 |
| PTCD2     | 0.068041 | 0.651092 | 0.303928 |
| NUDT8     | 0.523943 | 0.400491 | 0.764023 |
| SLC35F5   | 0.632804 | 0.244101 | 0.831075 |
| MITD1     | 0.163509 | 0.82515  | 0.453012 |
| LACE1     | 0.958791 | -0.07584 | 0.994122 |
| ZFAND2B   | 0.021542 | 1.345088 | 0.175548 |
| HEXDC     | 0.455572 | 0.210088 | 0.71417  |
| CHTF18    | 0.197193 | 0.667208 | 0.490309 |
| LEO1      | 0.881999 | -0.14738 | 0.961515 |
| DCAKD     | 0.559385 | 0.211448 | 0.78633  |
| RNF141    | 0.565774 | 0.385976 | 0.79107  |
| N6AMT2    | 0.167109 | 0.311107 | 0.457139 |
| TMEM170A  | 0.102462 | -0.56378 | 0.364372 |
| OSCP1     | 0.496712 | -0.40646 | 0.74366  |
| SMIM4     | 0.72732  | 0.21495  | 0.878927 |
| NUDCD2    | 0.586319 | -0.1615  | 0.801141 |
| SNRNP27   | 0.133789 | 1.397709 | 0.416228 |
| SKA2      | 0.540968 | 0.145602 | 0.775521 |
| ANKRD49   | 0.453445 | 0.402051 | 0.712914 |
| TFB1M     | 0.539269 | -0.03036 | 0.775046 |
| STAG1     | 0.006511 | 0.511924 | 0.096023 |
| SCFD1     | 0.021148 | 0.248014 | 0.173882 |
| SECTM1    | 0.401678 | -0.43524 | 0.677774 |
| UBE2Q2    | 0.699852 | -0.26642 | 0.864371 |
| TNFAIP8L1 | 0.436915 | 0.162798 | 0.701684 |
| CANT1     | 0.032856 | 0.6307   | 0.217297 |
| C7orf43   | 0.009851 | 1.334779 | 0.120067 |
| WDR60     | 0.481993 | -0.10253 | 0.733586 |
| TRAPPC12  | 0.2958   | 0.213767 | 0.598344 |
| POF1B     | 0.029211 | 2.480555 | 0.20681  |
| HNRNPLL   | 0.002185 | 0.409071 | 0.049962 |
| C4orf3    | 0.139034 | 1.548381 | 0.4248   |
| FAR1      | 0.029444 | 0.929112 | 0.207345 |
| UBLCP1    | 0.364426 | 0.25684  | 0.646996 |
| TSEN15    | 0.186259 | 1.278639 | 0.478636 |
| PCNP      | 0.498977 | 0.300328 | 0.744839 |
| DNAJA4    | 0.763569 | 0.381481 | 0.899242 |
| TEKT4     | 0.157319 | -0.38791 | 0.447277 |
| GTSF1     | 0.57907  | -0.12373 | 0.796675 |
| APH1B     | 0.683896 | 0.25629  | 0.85709  |
| SPRYD4    | 0.383925 | -0.15819 | 0.66367  |



|         |          |          |          |
|---------|----------|----------|----------|
| TMED6   | 0.563678 | -0.23617 | 0.789479 |
| ITLN1   | 0.969086 | -0.13602 | 0.997592 |
| TMEM40  | 0.321952 | 0.479689 | 0.613139 |
| GLMP    | 0.091899 | 0.69827  | 0.345626 |
| C2orf47 | 0.794443 | 0.119071 | 0.913708 |
| CAPSL   | 0.5199   | 0.355407 | 0.760272 |
| TRUB1   | 0.260147 | 0.586847 | 0.56373  |
| LMO7    | 0.586319 | -0.0269  | 0.801141 |
| SLC44A1 | 0.023065 | 0.547445 | 0.182986 |
| CKAP2   | 0.133624 | 0.571377 | 0.416228 |
| ATXN2L  | 0.014268 | 0.496672 | 0.145444 |
| CYGB    | 0.638143 | 0.376759 | 0.834211 |
| ARAP3   | 0.050169 | 1.074959 | 0.263211 |
| GIMAP1  | 0.704483 | -0.09565 | 0.867291 |
| PHIP    | 0.934288 | 0.059259 | 0.984157 |
| HPSE2   | 0.192496 | 0.40791  | 0.486094 |
| STAB2   | 0.479442 | -0.48214 | 0.731833 |
| RTN4IP1 | 0.892102 | -0.31219 | 0.966699 |
| RASSF5  | 0.875701 | -0.25864 | 0.958859 |
| SELM    | 0.003514 | 0.653056 | 0.067901 |
| PRPF31  | 0.003987 | 0.435964 | 0.071551 |
| LIPH    | 0.324878 | -0.90311 | 0.615409 |
| EDARADD | 0.310183 | 0.255382 | 0.609864 |
| IGFBPL1 | 0.683728 | -0.07085 | 0.85709  |
| NELFB   | 0.466082 | 0.261176 | 0.721065 |
| PALLD   | 8.99E-08 | 1.188256 | 2.25E-05 |
| RUFY2   | 0.059998 | 1.005439 | 0.286703 |
| SREK1   | 0.524435 | 0.364978 | 0.764023 |
| MYEOV2  | 0.34755  | 1.136353 | 0.632849 |
| GEMIN6  | 0.212622 | 1.315738 | 0.508813 |
| CASKIN2 | 0.096063 | 0.972068 | 0.352925 |
| ATRIP   | 0.014132 | 1.862024 | 0.144889 |
| STON2   | 0.104134 | 1.009666 | 0.367349 |
| PSPC1   | 0.442223 | 0.195695 | 0.703704 |
| ATL1    | 0.026447 | 0.296967 | 0.195939 |
| RSAD2   | 0.251789 | -0.65551 | 0.555643 |
| MADD    | 0.116249 | 0.640109 | 0.389168 |
| SYNE2   | 0.981581 | -0.00262 | 1        |
| ACOT11  | 0.359911 | -0.68293 | 0.644411 |
| MUC16   | 0.313197 | 0.530743 | 0.611346 |
| GATAD2B | 0.006317 | 0.966421 | 0.094168 |
| MYO3B   | 0.166815 | 0.634245 | 0.457139 |
| PIBF1   | 0.115261 | 0.727967 | 0.387731 |
| DNAJC9  | 0.00094  | 0.606669 | 0.02929  |
| AUTS2   | 0.421207 | 0.083758 | 0.691066 |
| BRI3BP  | 0.033942 | 0.481244 | 0.221141 |
| BBX     | 0.113096 | 0.803085 | 0.383358 |
| THAP4   | 0.565604 | 0.180396 | 0.79107  |
| TMEM234 | 0.322009 | 0.124649 | 0.613139 |
| IFT81   | 0.789191 | 0.112154 | 0.911483 |
| CTNBL1  | 0.074384 | 0.216351 | 0.317894 |
| ING5    | 0.101434 | 1.017143 | 0.362438 |
| SEPTIN1 | 0.611442 | -0.60351 | 0.818417 |
| SSH1    | 0.003733 | 1.422115 | 0.070138 |
| ATG4A   | 0.883716 | -0.05718 | 0.963083 |
| RIN2    | 2.40E-05 | 2.226782 | 0.001947 |
| AHCTF1  | 0.081043 | 0.417236 | 0.328405 |
| CHCHD10 | 0.141292 | 0.720884 | 0.427981 |

|         |          |          |          |
|---------|----------|----------|----------|
| DGCR8   | 0.14785  | 0.646815 | 0.436815 |
| ZCCHC14 | 0.57907  | -0.12295 | 0.796675 |
| PIK3R5  | 0.15526  | 0.20049  | 0.444958 |
| RSPH1   | 0.688686 | -0.18126 | 0.859429 |
| TMEM190 | 0.08528  | -0.4205  | 0.335537 |
| KLHL6   | 0.046096 | 1.481217 | 0.252472 |
| ARAP2   | 0.233429 | 0.899239 | 0.535403 |
| RFFL    | 0.302856 | 0.260681 | 0.604766 |
| ROBO4   | 0.08528  | -0.18539 | 0.335537 |
| OVCA2   | 0.263505 | 0.480167 | 0.565873 |
| LZIC    | 0.609213 | 0.12653  | 0.816529 |
| POMGNT1 | 0.582211 | 0.051669 | 0.798306 |
| IRGQ    | 0.54177  | 0.046201 | 0.775521 |
| ST8SIA4 | 0.193164 | 0.738652 | 0.487015 |
| DDB2    | 0.255036 | 0.417621 | 0.557593 |
| CLEC2B  | 0.105526 | 1.371026 | 0.369791 |
| SMPDL3A | 0.988097 | -0.03356 | 1        |
| SMPDL3B | 0.274985 | 0.020839 | 0.577625 |
| DDX1    | 0.030249 | 0.155761 | 0.209418 |
| STARD8  | 0.310183 | -0.28961 | 0.609864 |
| SEC14L1 | 0.029828 | 1.061881 | 0.208196 |
| SLC39A7 | 0.667966 | -0.26196 | 0.849281 |
| HSD17B8 | 1.32E-05 | -1.32224 | 0.00119  |
| PIEZO1  | 0.02302  | 0.842539 | 0.182986 |
| FAM3C   | 0.162993 | 0.430748 | 0.453012 |
| PIGB    | 0.122914 | 0.677219 | 0.399191 |
| H1FX    | 0.794443 | 0.063417 | 0.913708 |
| CPT1B   | 0.423133 | 0.16618  | 0.69177  |
| PSMF1   | 0.221112 | 0.279839 | 0.519064 |
| SLC7A6  | 0.358301 | 0.617393 | 0.642612 |
| GBF1    | 0.00511  | 0.364319 | 0.083708 |
| LPIN2   | 0.728634 | -0.20832 | 0.879656 |
| SMG7    | 0.876779 | -0.11822 | 0.958859 |
| RTF1    | 0.840548 | 0.371726 | 0.939212 |
| NCSTN   | 0.11568  | 0.239759 | 0.387731 |
| SNX19   | 0.176103 | 0.860308 | 0.468045 |
| TM9SF4  | 0.415291 | 0.149136 | 0.686028 |
| TMEM131 | 0.843384 | -0.11943 | 0.941517 |
| RGP1    | 0.002532 | 2.108608 | 0.055387 |
| TOPBP1  | 0.263695 | -0.51639 | 0.565913 |
| IP6K1   | 0.337822 | 0.32458  | 0.625298 |
| MRPS27  | 0.233812 | 0.255269 | 0.535403 |
| ELMO1   | 0.32085  | 0.091426 | 0.613139 |
| WASF1   | 0.670768 | -0.08621 | 0.850681 |
| BAP1    | 0.00394  | 1.167315 | 0.071362 |
| FIG4    | 0.1197   | 0.700549 | 0.394412 |
| SPOCK2  | 0.852558 | -0.02254 | 0.946235 |
| NR4A3   | 0.556057 | 0.146599 | 0.783439 |
| AP3S1   | 0.008743 | 0.738252 | 0.112752 |
| TSC1    | 0.257912 | 0.527311 | 0.560462 |
| UBXN4   | 0.595428 | 0.171362 | 0.806337 |
| PHF3    | 0.033844 | 1.036008 | 0.221141 |
| SLC9A6  | 0.041883 | 0.949148 | 0.242067 |
| MAML1   | 0.366436 | 0.230145 | 0.649119 |
| NDRG1   | 0.298858 | 0.265577 | 0.601676 |
| HSPH1   | 0.305036 | 0.179989 | 0.606083 |
| SEPTIN8 | 9.45E-06 | 0.705303 | 0.000928 |
| RQCD1   | 0.005006 | 0.426536 | 0.082994 |

|          |          |          |          |
|----------|----------|----------|----------|
| LPGAT1   | 0.049723 | 0.615254 | 0.261364 |
| DOCK2    | 0.289748 | 0.130069 | 0.593134 |
| TBC1D5   | 0.255193 | 0.49065  | 0.557593 |
| ZNF592   | 0.091287 | 0.846188 | 0.345435 |
| EDEM1    | 0.149664 | 0.520603 | 0.439016 |
| JADE3    | 0.601315 | 0.209035 | 0.811336 |
| MYO18A   | 0.76912  | 0.038944 | 0.901915 |
| LARP4B   | 0.458049 | -0.11417 | 0.715224 |
| GCN1L1   | 0.072266 | 0.230063 | 0.313701 |
| ZNF516   | 0.249679 | 0.499383 | 0.552833 |
| HMHA1    | 0.689846 | -0.16582 | 0.859429 |
| DHX38    | 0.000337 | 0.874848 | 0.015578 |
| NUP205   | 0.794443 | -0.11178 | 0.913708 |
| KIAA0226 | 0.333105 | 0.465184 | 0.620722 |
| TTC9     | 0.676745 | -0.27444 | 0.854135 |
| APPBP2   | 0.932488 | -0.13038 | 0.984157 |
| ANKS1A   | 0.623137 | -0.29062 | 0.825978 |
| PXDN     | 0.011419 | 0.57671  | 0.128971 |
| SGCD     | 0.009443 | 0.826658 | 0.117552 |
| LPAR1    | 0.771591 | 0.096404 | 0.903336 |
| NSMAF    | 0.117602 | 0.793236 | 0.391103 |
| PIGK     | 0.085745 | 0.358111 | 0.335537 |
| MRPS31   | 0.233812 | 0.277933 | 0.535403 |
| AKAP1    | 0.561596 | -0.11224 | 0.788865 |
| SORL1    | 0.913333 | 0.08494  | 0.975706 |
| ALG3     | 0.052176 | 0.848115 | 0.267704 |
| ANP32B   | 0.438315 | -0.16158 | 0.701933 |
| PVRL2    | 0.031529 | 0.363208 | 0.214006 |
| RABGGTA  | 0.934288 | -0.18091 | 0.984157 |
| PTPRU    | 0.930143 | -0.0246  | 0.983996 |
| PRCC     | 0.262943 | 0.584145 | 0.565873 |
| TFG      | 0.029749 | 0.319313 | 0.208169 |
| USP6NL   | 0.503122 | -0.35717 | 0.747596 |
| HTRA1    | 0.002838 | 0.7086   | 0.060074 |
| ARPC1A   | 0.041202 | 0.269545 | 0.240826 |
| TNR      | 0.382354 | -0.18427 | 0.661883 |
| TFAP2C   | 0.671985 | 0.331996 | 0.851286 |
| GTF2H4   | 0.014209 | 1.132196 | 0.145268 |
| KRT35    | 0.05372  | -1.26825 | 0.271194 |
| FRZB     | 0.221202 | 0.954788 | 0.519118 |
| RREB1    | 0.778432 | 0.231028 | 0.906856 |
| HDAC2    | 0.001829 | 0.620432 | 0.044883 |
| STAM     | 0.00841  | 0.761604 | 0.110127 |
| DPF3     | 0.145032 | 0.611687 | 0.433688 |
| DPF2     | 0.866426 | 0.041041 | 0.953042 |
| PROX1    | 0.976419 | 0.030626 | 0.998921 |
| LEPREL4  | 2.23E-18 | 3.704144 | 2.47E-14 |
| CREBBP   | 0.124973 | 0.775116 | 0.401334 |
| KAT6A    | 0.988816 | 0.055776 | 1        |
| DLG3     | 0.218354 | -0.24809 | 0.515816 |
| SYMPK    | 0.020781 | 0.364236 | 0.172048 |
| EZH1     | 0.853692 | 0.088759 | 0.946925 |
| TAF15    | 0.637197 | 0.150693 | 0.833511 |
| GOLGA1   | 0.052064 | 0.849104 | 0.267367 |
| EVPL     | 0.017103 | -0.80971 | 0.157941 |
| GGH      | 0.034511 | 0.422036 | 0.222148 |
| NRCAM    | 0.907445 | 0.044756 | 0.9734   |
| PCSK5    | 0.131365 | 0.275695 | 0.413476 |

|          |          |          |          |
|----------|----------|----------|----------|
| CORO2A   | 0.537405 | -0.29611 | 0.773175 |
| KAT2A    | 0.265744 | 0.423438 | 0.568807 |
| NELL1    | 0.929566 | -0.1079  | 0.983573 |
| INPP5D   | 0.43056  | 0.117295 | 0.695651 |
| DDX17    | 0.063339 | 0.177879 | 0.294055 |
| BCL2L2   | 0.471676 | 0.49729  | 0.726074 |
| TANK     | 0.027815 | 1.112217 | 0.202072 |
| KIFAP3   | 0.939399 | 0.161498 | 0.986498 |
| CASP10   | 0.434426 | 0.457671 | 0.698194 |
| SEMA4D   | 0.853939 | -0.08557 | 0.946993 |
| NEO1     | 0.855612 | 0.357971 | 0.946993 |
| APBB2    | 0.051558 | 1.047011 | 0.266309 |
| PMM1     | 0.356402 | -0.29517 | 0.641385 |
| KLK6     | 0.135713 | 0.80444  | 0.419275 |
| RAD50    | 0.039276 | 0.254144 | 0.236232 |
| CELF1    | 0.05451  | 0.384841 | 0.273313 |
| OSTF1    | 0.039276 | 0.250182 | 0.236232 |
| ABCC2    | 0.78961  | 0.254723 | 0.911676 |
| ARHGEF1  | 0.450097 | 0.061257 | 0.709598 |
| ERCC4    | 0.078755 | 0.315594 | 0.32578  |
| UFD1L    | 0.135171 | 0.177358 | 0.417833 |
| GLG1     | 0.001332 | 0.484961 | 0.036119 |
| UPF1     | 0.142204 | 0.188461 | 0.428816 |
| HPS1     | 0.40975  | 0.303155 | 0.68267  |
| CDS1     | 0.276465 | -0.80439 | 0.579677 |
| DAZL     | 0.15526  | 0.394233 | 0.444958 |
| COPS5    | 0.177368 | 0.161849 | 0.468602 |
| GATA6    | 0.671735 | -0.16362 | 0.851286 |
| FGF13    | 1        | -0.0007  | 1        |
| GPKOW    | 0.1422   | 0.532459 | 0.428816 |
| MAP4K1   | 0.637439 | 0.318083 | 0.833511 |
| SMARCC1  | 0.058787 | 0.61599  | 0.283235 |
| SMARCD2  | 0.533067 | 0.120843 | 0.7709   |
| RAB8B    | 0.515876 | -0.07015 | 0.757825 |
| BAD      | 0.351365 | 1.112375 | 0.636424 |
| KHSRP    | 0.641914 | 0.099495 | 0.835764 |
| GCDH     | 0.324076 | -0.36907 | 0.614309 |
| PRG4     | 0.533637 | 0.314926 | 0.771048 |
| TNFRSF14 | 0.183419 | 0.889226 | 0.474829 |
| SLCO2A1  | 0.783813 | 0.012146 | 0.909506 |
| RIT1     | 0.031822 | 1.265597 | 0.214292 |
| PEX13    | 0.020289 | 1.341185 | 0.170514 |
| TNPO1    | 0.520146 | 0.08281  | 0.760272 |
| ARHGEF2  | 0.260744 | 0.198144 | 0.56373  |
| EMG1     | 0.068179 | 0.266903 | 0.303928 |
| NINJ1    | 0.274193 | 0.775521 | 0.577625 |
| IRF7     | 0.138572 | 0.916568 | 0.424105 |
| CLP1     | 0.04752  | 1.147268 | 0.256066 |
| GLMN     | 0.187853 | 0.672719 | 0.480067 |
| KAT5     | 0.418567 | 0.460961 | 0.688796 |
| BRF1     | 0.628247 | -0.28415 | 0.829411 |
| USP13    | 0.822828 | -0.12979 | 0.929468 |
| DVL3     | 0.0247   | 1.483734 | 0.190022 |
| USP9X    | 0.311298 | 0.108661 | 0.609894 |
| USP7     | 0.280828 | 0.073737 | 0.583434 |
| NAT6     | 0.013213 | -0.74525 | 0.140906 |
| CD101    | 0.861859 | 0.07021  | 0.950565 |
| CUL5     | 0.357491 | -0.14926 | 0.641472 |

|                     |          |          |          |
|---------------------|----------|----------|----------|
| STMN2               | 0.756519 | -0.36011 | 0.896333 |
| ATP6V0A1            | 0.04896  | -0.3254  | 0.259694 |
| LPP                 | 0.001913 | 0.420156 | 0.046318 |
| RBPMS               | 0.546146 | 0.431492 | 0.778738 |
| EXT2                | 0.081727 | 1.077645 | 0.330094 |
| ART4                | 0.247596 | -0.58629 | 0.55087  |
| SECISBP2L           | 0.822927 | -0.13438 | 0.929468 |
| MED12               | 0.00584  | 1.089644 | 0.089662 |
| HIST1H2AC           | 0.041461 | -2.13735 | 0.241008 |
| HIST1H2BH;HIST2H2BF | 0.381971 | -0.10015 | 0.661698 |
| ATP2A3              | 0.774166 | -0.02812 | 0.903913 |
| BHMT                | 0.686212 | -0.45416 | 0.857929 |
| RNASE6              | 0.017795 | 1.037451 | 0.161507 |
| PTP4A1              | 0.629589 | 0.314922 | 0.830392 |
| WNT2B               | 0.322271 | -0.31544 | 0.613404 |
| HGD                 | 0.610306 | 0.267472 | 0.817501 |
| PHKB                | 0.155179 | -0.45428 | 0.444958 |
| HLA-B               | 0.016955 | 2.16898  | 0.157494 |
| MR1                 | 0.012351 | 1.709197 | 0.135633 |
| HLA-DRB1            | 0.675402 | 0.520834 | 0.853176 |
| SCAMP4              | 0.550538 | 0.324752 | 0.781327 |
| TCEAL3;TCEAL5       | 0.110195 | -1.37042 | 0.378734 |
| TSR2                | 0.889651 | 0.239531 | 0.966133 |
| GTF3C6              | 0.874646 | 0.003913 | 0.958094 |
| HPS3                | 0.002063 | 1.383081 | 0.048162 |
| SMARCE1             | 0.367925 | 0.171206 | 0.650718 |
| PRKCDBP             | 0.554955 | 0.194556 | 0.783439 |
| RFK                 | 0.243019 | -0.89619 | 0.546608 |
| CNKSRL1             | 0.729777 | -0.46808 | 0.880161 |
| POP5                | 0.041014 | 1.144848 | 0.240826 |
| MYDGF               | 0.286754 | 0.148147 | 0.590053 |
| GLYATL1             | 0.397751 | 0.457307 | 0.675257 |
| ZKSCAN4             | 0.137489 | 0.38002  | 0.422524 |
| LOH12CR1            | 0.003507 | -1.2934  | 0.067901 |
| RNF34               | 0.167504 | 0.463892 | 0.457358 |
| MAL2                | 0.611514 | -0.50322 | 0.818417 |
| TOMM40L             | 0.020469 | 1.596558 | 0.170697 |
| YIPF5               | 0.784217 | 0.703498 | 0.909506 |
| UBE2F               | 0.309006 | 0.520705 | 0.609864 |
| PIGT                | 0.037428 | 0.352781 | 0.231646 |
| IGSF8               | 0.26918  | 0.189111 | 0.571371 |
| TOP1MT              | 0.027102 | 0.745184 | 0.199066 |
| RPL36AL             | 0.866418 | -0.17538 | 0.953042 |
| ARL11               | 0.133765 | 0.57924  | 0.416228 |
| RAB24               | 0.568286 | -0.04699 | 0.791838 |
| OSBP2               | 0.374482 | 0.359417 | 0.656862 |
| L3MBTL2             | 0.067342 | 0.69374  | 0.302148 |
| ITFG2               | 0.923804 | -0.02057 | 0.980751 |
| NEIL2               | 0.260666 | 0.46496  | 0.56373  |
| ZNF622              | 0.003086 | 0.941997 | 0.063034 |
| HDAC10              | 0.120749 | -0.88442 | 0.395987 |
| GFM2                | 0.507366 | 0.128421 | 0.75153  |
| SNX21               | 0.447881 | 0.37738  | 0.708118 |
| NT5C3B              | 0.787721 | -0.07539 | 0.911483 |
| WBP2                | 0.861156 | 0.81521  | 0.950165 |
| FBXW5               | 0.373409 | 0.342812 | 0.656544 |
| PSMG2               | 0.45305  | 1.145153 | 0.712914 |
| NCLN                | 0.026002 | 0.344972 | 0.193808 |

|           |       |          |          |          |
|-----------|-------|----------|----------|----------|
| TEKT1     |       | 0.181133 | -0.33421 | 0.472575 |
| MUL1      |       | 0.273387 | 0.03481  | 0.57755  |
| MKL1      |       | 0.004167 | 1.277917 | 0.073586 |
| RILPL2    |       | 0.726238 | -0.16173 | 0.878089 |
| TMBIM1    |       | 0.94461  | -0.35124 | 0.988547 |
| ERGIC1    |       | 0.97106  | -0.05088 | 0.997592 |
| CIRH1A    |       | 0.311298 | 0.181478 | 0.609894 |
| GTPBP3    |       | 0.734024 | -0.18075 | 0.882858 |
| TBRG4     |       | 0.105374 | 0.593007 | 0.369374 |
|           | 2-Mar | 0.015071 | -0.66781 | 0.150049 |
| PPP1R14A  |       | 0.398866 | 1.018137 | 0.676219 |
| HIST1H2BA |       | 0.007217 | -1.49329 | 0.101678 |
| CCDC102A  |       | 0.905372 | 0.181998 | 0.973106 |
| C11orf52  |       | 0.118954 | -1.08528 | 0.392655 |
| CPNE4     |       | 0.901067 | 0.104478 | 0.971583 |
| FAM162A   |       | 0.112657 | 0.504294 | 0.382523 |
| SLC35C1   |       | 0.299936 | 0.776182 | 0.602797 |
| MYLPF     |       | 0.683128 | 0.194689 | 0.85709  |
| CCDC47    |       | 0.157109 | 0.177113 | 0.447022 |
| MRPL24    |       | 0.637197 | 0.12848  | 0.833511 |
| RNF166    |       | 0.266479 | 0.216217 | 0.568807 |
| SLC25A28  |       | 0.359903 | 0.297162 | 0.644411 |
| SYAP1     |       | 0.098469 | -0.17211 | 0.357719 |
| TMEM230   |       | 0.329059 | 0.54418  | 0.619341 |
| RERG      |       | 0.051749 | -0.74291 | 0.266457 |
| EXOC4     |       | 0.260744 | 0.154663 | 0.56373  |
| MAGOH     |       | 0.031688 | 1.100093 | 0.214212 |
| KIAA1191  |       | 0.701917 | 0.378206 | 0.866168 |
| COL26A1   |       | 0.131554 | 1.815922 | 0.413476 |
| RFT1      |       | 0.055344 | 0.523449 | 0.274516 |
| ISOC2     |       | 0.162993 | 0.157107 | 0.453012 |
| NTAN1     |       | 0.151757 | 0.846527 | 0.441884 |
| FERMT2    |       | 0.149515 | 0.236666 | 0.438811 |
| PNPLA2    |       | 0.88873  | 0.087956 | 0.965603 |
| FUBP1     |       | 0.43056  | 0.172477 | 0.695651 |
| TTC17     |       | 0.323964 | 0.321799 | 0.614309 |
| SLC25A46  |       | 0.477834 | 0.318684 | 0.730754 |
| LRRC59    |       | 0.009444 | 0.308013 | 0.117552 |
| RAB7B     |       | 0.01393  | 1.707227 | 0.144006 |
| CLUAP1    |       | 0.545115 | 0.248133 | 0.778738 |
| VTI1A     |       | 0.160074 | 0.904147 | 0.452557 |
| APOBEC3D  |       | 0.276362 | -0.30883 | 0.579677 |
| MRGPRF    |       | 0.307968 | 0.687833 | 0.609277 |
| TMEM143   |       | 0.287608 | -0.59408 | 0.591153 |
| ACD       |       | 0.447084 | 0.32386  | 0.707261 |
| ESAM      |       | 0.913246 | -0.13442 | 0.975706 |
| TMEM125   |       | 0.057058 | -1.24962 | 0.278658 |
| PBXIP1    |       | 0.327323 | 0.274997 | 0.617719 |
| MCUR1     |       | 0.426503 | 0.425611 | 0.693599 |
| KIAA1143  |       | 0.278808 | 0.622637 | 0.581068 |
| RPE       |       | 0.734083 | -0.1767  | 0.882858 |
| VPS33A    |       | 0.057044 | 0.255787 | 0.278658 |
| RAB37     |       | 0.235524 | -0.78172 | 0.53771  |
| MIB2      |       | 0.001082 | 1.533278 | 0.031645 |
| FKBP10    |       | 1.91E-10 | 1.769876 | 3.84E-07 |
| TTC28     |       | 0.019173 | 1.046085 | 0.166914 |
| ISG20     |       | 0.76912  | -0.19803 | 0.901915 |
| UBE2W     |       | 0.041397 | 0.633192 | 0.240826 |

|          |          |          |          |
|----------|----------|----------|----------|
| C18orf25 | 0.087925 | -1.24908 | 0.339301 |
| EXOSC8   | 0.082198 | 0.298664 | 0.330671 |
| CLDN23   | 0.440294 | -0.26545 | 0.70314  |
| AKT1S1   | 0.037422 | 0.97775  | 0.231646 |
| C10orf32 | 0.641882 | -0.5069  | 0.835764 |
| TOMM6    | 0.268747 | -1.24199 | 0.571371 |
| ZNF428   | 0.447813 | 0.894474 | 0.708118 |
| LENG9    | 0.379847 | 0.592323 | 0.661258 |
| TMEM186  | 0.157076 | 0.925432 | 0.447022 |
| RGMA     | 0.300882 | 0.253835 | 0.602797 |
| TMEM159  | 0.2111   | 1.443073 | 0.506632 |
| SH3KBP1  | 0.343873 | 0.17081  | 0.630156 |
| CREB3L1  | 0.710688 | -0.01931 | 0.870136 |
| SLCO4A1  | 0.626197 | 0.120051 | 0.828579 |
| PHF21A   | 0.927662 | 0.078836 | 0.983115 |
| SKA1     | 0.00607  | 0.820829 | 0.091588 |
| NACC2    | 0.319916 | 0.4154   | 0.613139 |
| RNF25    | 0.498835 | -0.49065 | 0.744839 |
| SLC22A18 | 0.199364 | 0.560909 | 0.49217  |
| APH1A    | 0.429904 | 0.511622 | 0.695651 |
| AIDA     | 0.33719  | 0.371106 | 0.624371 |
| ELMO3    | 0.096906 | -0.84523 | 0.354489 |
| PINX1    | 0.204751 | 0.789667 | 0.499097 |
| ARL8A    | 1        | 0.018902 | 1        |
| TADA1    | 0.118513 | 0.903431 | 0.392409 |
| OTULIN   | 0.109483 | 0.913608 | 0.377423 |
| CHCHD1   | 0.747938 | 0.266878 | 0.890902 |
| PPWD1    | 0.02267  | 0.449486 | 0.180886 |
| FAM3D    | 0.759283 | -0.29024 | 0.896923 |
| CCDC127  | 0.251071 | -0.53736 | 0.554953 |
| SGK3     | 0.944222 | -0.0521  | 0.988547 |
| COA7     | 0.670506 | -0.24925 | 0.850681 |
| TESC     | 0.711208 | 0.380567 | 0.870136 |
| CENPT    | 0.384669 | 0.200846 | 0.66413  |
| ALKBH8   | 0.430232 | 0.271061 | 0.695651 |
| UPRT     | 0.542438 | 0.914563 | 0.775781 |
| PTER     | 0.274972 | -0.90121 | 0.577625 |
| TAMM41   | 0.101842 | 0.799923 | 0.363392 |
| MOB3A    | 0.541018 | 0.635593 | 0.775521 |
| DOCK10   | 0.078771 | 0.533209 | 0.32578  |
| ATG2B    | 0.089183 | 0.885541 | 0.341477 |
| SARAF    | 0.762178 | 0.206232 | 0.899242 |
| PLD4     | 0.535404 | 0.351716 | 0.772696 |
| TBC1D20  | 0.025164 | 1.12773  | 0.191949 |
| ZBTB9    | 0.085209 | 0.75106  | 0.335537 |
| FAM136A  | 0.105374 | -0.48099 | 0.369374 |
| DHX58    | 0.280854 | 0.270751 | 0.583434 |
| FGGY     | 0.803024 | -0.1098  | 0.918848 |
| ARMC5    | 0.599951 | -0.61319 | 0.810262 |
| EFHD2    | 0.138653 | 0.379385 | 0.424105 |
| GALM     | 0.360948 | -0.20321 | 0.644411 |
| SYTL4    | 0.557951 | 0.427721 | 0.785807 |
| RUNDC1   | 0.657918 | -0.18759 | 0.842898 |
| PYCR2    | 0.568296 | 0.114361 | 0.791838 |
| ZNF524   | 0.076728 | -0.72428 | 0.323325 |
| C12orf43 | 0.122179 | 1.006605 | 0.397854 |
| ROPN1L   | 0.612037 | -0.11471 | 0.81882  |
| DCPS     | 0.494799 | -0.16116 | 0.741997 |

|          |          |          |          |
|----------|----------|----------|----------|
| PPP1R14B | 0.830217 | 0.097972 | 0.933615 |
| SDCCAG3  | 0.122635 | 0.854744 | 0.39887  |
| INTS12   | 0.002174 | 2.023848 | 0.049962 |
| NSUN4    | 0.524424 | 0.175614 | 0.764023 |
| RHBDF1   | 0.818371 | 0.407639 | 0.92687  |
| FBXL8    | 0.383036 | 0.869774 | 0.662548 |
| PPCDC    | 0.64158  | -0.04702 | 0.835764 |
| TM4SF18  | 0.567751 | -0.2513  | 0.791838 |
| CHMP4C   | 0.578817 | 0.503029 | 0.796675 |
| TIFA     | 0.337913 | 0.664695 | 0.625324 |
| CTHRC1   | 7.64E-10 | 3.609685 | 1.06E-06 |
| RPUSD4   | 0.035909 | 0.851513 | 0.226677 |
| ACSF2    | 0.537409 | -0.00015 | 0.773175 |
| EVI5L    | 0.142815 | 0.845927 | 0.430424 |
| LRRC45   | 0.829882 | 0.115319 | 0.933615 |
| ISOC1    | 0.314461 | 0.228808 | 0.612305 |
| GCC1     | 0.749036 | 0.036938 | 0.890902 |
| FLYWCH2  | 0.58391  | 0.515893 | 0.800019 |
| GRAMD1A  | 0.044191 | 1.407517 | 0.24851  |
| TLCD1    | 0.633541 | -0.34374 | 0.831846 |
| SLC25A36 | 0.84226  | -0.07325 | 0.940547 |
| HAUS1    | 0.087821 | 1.127095 | 0.339301 |
| FAF2     | 0.031269 | 0.228836 | 0.212999 |
| PLEKHB2  | 0.674987 | 0.239573 | 0.853175 |
| CCDC124  | 0.117214 | 0.213571 | 0.389929 |
| FOXRED1  | 0.030485 | 0.65916  | 0.210793 |
| OPTN     | 0.005543 | 0.535494 | 0.087699 |
| AP2M1    | 0.077655 | 0.191705 | 0.324641 |
| TUBGCP3  | 0.000554 | 0.54017  | 0.021722 |
| SLC7A6OS | 0.518128 | 0.408575 | 0.760272 |
| KCTD12   | 0.045294 | 0.332824 | 0.250872 |
| ZNF501   | 0.045488 | -0.4169  | 0.250872 |
| LRRC58   | 0.189828 | 0.577361 | 0.483202 |
| C10orf35 | 0.932715 | -0.14509 | 0.984157 |
| RCN3     | 1.33E-08 | 1.56809  | 6.13E-06 |
| ORAI1    | 0.714734 | 0.196953 | 0.871878 |
| NMD3     | 0.000596 | 1.009934 | 0.022651 |
| ADCK4    | 0.460039 | 0.297747 | 0.717621 |
| REPS1    | 0.675324 | 0.180098 | 0.853175 |
| HVCN1    | 0.61848  | 0.133544 | 0.822194 |
| ZG16B    | 0.678919 | -0.42085 | 0.855378 |
| RAB39B   | 0.095807 | 0.40638  | 0.352331 |
| DNAJC19  | 0.784217 | 0.091897 | 0.909506 |
| HDAC11   | 0.943701 | 0.080754 | 0.988547 |
| RMDN1    | 0.779221 | 0.04518  | 0.906856 |
| TMCO6    | 0.181133 | -0.32744 | 0.472575 |
| ECHDC3   | 0.018852 | -1.04609 | 0.166474 |
| NUDT16   | 0.819984 | 0.008298 | 0.92687  |
| ANAPC16  | 0.530095 | 0.348194 | 0.768664 |
| DGCR14   | 0.002608 | 1.812931 | 0.056494 |
| CMBL     | 0.57727  | -0.14649 | 0.796634 |
| MSI2     | 0.866426 | -0.09351 | 0.953042 |
| SNRNP40  | 0.442223 | 0.115077 | 0.703704 |
| C18orf8  | 0.04896  | 0.492483 | 0.259694 |
| MTFMT    | 0.756861 | -0.3343  | 0.896353 |
| ARHGEF26 | 0.949005 | 0.115709 | 0.990863 |
| LGALS12  | 0.163587 | 0.580379 | 0.453012 |
| ATG4C    | 0.083398 | 0.948708 | 0.332962 |



|           |          |          |          |
|-----------|----------|----------|----------|
| ZBTB10    | 0.06058  | -0.88957 | 0.287134 |
| SLAMF6    | 0.681268 | 0.190486 | 0.856391 |
| ITPKC     | 0.453217 | 0.441996 | 0.712914 |
| MRPL38    | 0.632496 | 0.256668 | 0.830965 |
| SLC25A38  | 0.161733 | 0.386177 | 0.453012 |
| RSPRY1    | 0.000939 | 1.458435 | 0.02929  |
| ASB9      | 0.054703 | -1.28716 | 0.273787 |
| RTP4      | 0.402634 | 0.470905 | 0.678038 |
| ERLEC1    | 0.034511 | 0.320194 | 0.222148 |
| CMTM5     | 0.696781 | -0.06881 | 0.863213 |
| MRRF      | 0.411416 | -0.23316 | 0.683152 |
| RMI2      | 0.104774 | 0.756663 | 0.368787 |
| SMIM19    | 0.442884 | -0.62815 | 0.704334 |
| MTERF3    | 0.060747 | 1.227839 | 0.287678 |
| RBMXL1    | 0.360947 | -0.55213 | 0.644411 |
| C9orf9    | 0.980552 | 0.063774 | 1        |
| OMA1      | 0.221996 | -0.64821 | 0.520431 |
| ELP4      | 0.033956 | 1.034989 | 0.221141 |
| SIRT1     | 0.203522 | 0.713479 | 0.497963 |
| YIPF6     | 0.11416  | -0.0151  | 0.385201 |
| HOOK2     | 0.989472 | 0.111068 | 1        |
| SEH1L     | 0.236413 | 0.101172 | 0.537858 |
| CCDC126   | 0.005451 | 2.152625 | 0.086993 |
| FBXO17    | 0.121356 | 0.550653 | 0.397271 |
| MALSU1    | 0.918415 | -0.01278 | 0.978657 |
| TCEAL4    | 0.297811 | 0.990438 | 0.601315 |
| THAP11    | 0.293316 | 0.833323 | 0.596247 |
| KIAA1279  | 0.167007 | 0.552318 | 0.457139 |
| GNPNAT1   | 0.350614 | 0.734767 | 0.635657 |
| FAM120B   | 0.773231 | -0.10746 | 0.903913 |
| KTI12     | 0.409681 | 0.509998 | 0.682657 |
| MRPS24    | 0.149452 | 0.450282 | 0.438811 |
| MRPL53    | 0.641882 | -0.39655 | 0.835764 |
| L3HYPDH   | 0.000593 | 1.629543 | 0.022651 |
| MOCOS     | 0.188151 | -0.46802 | 0.480067 |
| RNF31     | 0.031269 | 0.535985 | 0.212999 |
| DAZAP1    | 0.819984 | -0.03184 | 0.92687  |
| SLC10A4   | 0.15526  | 0.34433  | 0.444958 |
| SGTB      | 0.341196 | 0.715359 | 0.628291 |
| SAAL1     | 0.238285 | 0.57995  | 0.540624 |
| CCDC51    | 0.887225 | 0.080964 | 0.96416  |
| MFSD3     | 0.575621 | -0.34592 | 0.796634 |
| CCDC101   | 0.29979  | 0.222932 | 0.602797 |
| TVP23C    | 0.963074 | -0.04282 | 0.995704 |
| RRP36     | 0.416163 | 0.536705 | 0.68706  |
| C1GALT1C1 | 0.42933  | 0.419179 | 0.695651 |
| RBM33     | 0.042445 | 0.752326 | 0.243142 |
| DTNBP1    | 0.028747 | 0.87055  | 0.204946 |
| HSPBAP1   | 0.205597 | 0.580222 | 0.499952 |
| SMIM12    | 0.441778 | -0.51941 | 0.703704 |
| WDR34     | 0.739737 | 0.061049 | 0.886374 |
| DNAJA3    | 0.908103 | 0.031655 | 0.9734   |
| TMA16     | 0.337143 | 0.559322 | 0.624371 |
| MVB12A    | 0.218562 | -0.42165 | 0.515816 |
| PTCD3     | 0.216173 | 0.184138 | 0.512741 |
| MMAB      | 0.490639 | -0.34271 | 0.738656 |
| MCRS1     | 0.069824 | 1.035496 | 0.308533 |
| CYFIP2    | 0.850885 | -0.26642 | 0.944945 |

|          |          |          |          |
|----------|----------|----------|----------|
| SAT2     | 0.7507   | -0.212   | 0.892487 |
| GIMAP5   | 0.389327 | -0.62478 | 0.667643 |
| NRBF2    | 0.126025 | 1.049196 | 0.403148 |
| ALG14    | 0.414218 | 0.874461 | 0.685923 |
| TRIM11   | 0.224644 | 0.719443 | 0.523685 |
| ZNF503   | 0.505111 | 0.295785 | 0.749557 |
| IL17RA   | 0.131255 | 0.683523 | 0.413476 |
| CCDC97   | 0.128872 | 1.107741 | 0.408844 |
| DISP1    | 0.555312 | -0.02369 | 0.783439 |
| CNRIP1   | 0.704468 | 0.492603 | 0.867291 |
| EDC3     | 0.004554 | 1.008536 | 0.078191 |
| PELI1    | 0.339213 | -0.12342 | 0.626409 |
| PHYHIP1  | 0.045488 | -0.59555 | 0.250872 |
| DDX11    | 0.144556 | -0.66413 | 0.433053 |
| PIK3IP1  | 0.237941 | -0.83037 | 0.540557 |
| MISP3    | 0.004366 | -2.03444 | 0.075776 |
| CDCA5    | 0.06188  | 0.934901 | 0.290811 |
| MEF2BNB  | 0.426727 | -0.55974 | 0.693599 |
| NEIL1    | 0.65654  | -0.08285 | 0.842398 |
| STAMBPL1 | 0.200884 | 0.835222 | 0.494233 |
| DYNLL2   | 0.934288 | 0.230211 | 0.984157 |
| WDR89    | 0.911082 | -0.1095  | 0.975706 |
| SLC47A1  | 0.559081 | -0.19469 | 0.78633  |
| GALNT14  | 0.219991 | 0.810539 | 0.518019 |
| PGAP3    | 1        | -0.03274 | 1        |
| CPNE2    | 0.981581 | 0.065172 | 1        |
| DTD2     | 0.622547 | 0.447074 | 0.825978 |
| S100A16  | 0.173168 | 0.369308 | 0.464476 |
| SIPA1    | 0.121915 | 0.341563 | 0.397343 |
| IFT43    | 0.181989 | 0.676268 | 0.473145 |
| LRRC46   | 0.664325 | 0.027815 | 0.847289 |
| SCRN2    | 0.858648 | 0.031351 | 0.949134 |
| THOC1    | 0.255193 | 0.292043 | 0.557593 |
| OTUB1    | 0.533067 | 0.088938 | 0.7709   |
| TRMT61A  | 0.776594 | 0.107863 | 0.905985 |
| PERP     | 0.156489 | 0.570793 | 0.44698  |
| HMCES    | 0.098646 | 1.039673 | 0.358247 |
| CMTM7    | 0.726229 | -0.32765 | 0.878089 |
| CHMP6    | 0.520146 | -0.1218  | 0.760272 |
| BICD1    | 0.000628 | 1.584008 | 0.023434 |
| PGM2     | 0.997369 | -0.02161 | 1        |
| IMP4     | 0.399288 | 0.742058 | 0.67622  |
| CERS2    | 0.135171 | 0.018005 | 0.417833 |
| MED8     | 0.170668 | 0.817349 | 0.461822 |
| CFAP36   | 0.275784 | 0.75381  | 0.578864 |
| KLHDC7B  | 0.045488 | -0.52624 | 0.250872 |
| DUS3L    | 0.071626 | 1.19207  | 0.312422 |
| P2RY11   | 0.119644 | 0.550066 | 0.394344 |
| BSCL2    | 0.341824 | 0.364381 | 0.629182 |
| LTV1     | 0.196229 | 0.934487 | 0.490309 |
| SDSL     | 0.108886 | 0.628025 | 0.375864 |
| MRPL48   | 0.739057 | 0.186455 | 0.886253 |
| VMP1     | 0.008089 | 0.640641 | 0.107782 |
| PDXP     | 0.694266 | 0.364882 | 0.861478 |
| SCMH1    | 0.438587 | -0.2838  | 0.701933 |
| AURKB    | 0.380481 | 0.46937  | 0.661698 |
| CEP95    | 0.937694 | -0.28815 | 0.986498 |
| CALML4   | 0.992139 | -0.08814 | 1        |

|            |          |          |          |
|------------|----------|----------|----------|
| TMEM261    | 0.140784 | 1.450348 | 0.42744  |
| DCUN1D1    | 0.389353 | 0.230649 | 0.667643 |
| FAM89A     | 0.386649 | 0.505214 | 0.665564 |
| TRMT2B     | 0.964759 | -0.09269 | 0.99616  |
| FAHD2A     | 0.434427 | 0.194483 | 0.698194 |
| SMARCD1    | 0.169002 | 0.624102 | 0.459676 |
| TOE1       | 0.894767 | 0.017086 | 0.968678 |
| CDCA7L     | 0.083536 | 0.536138 | 0.333074 |
| SCARF2     | 0.000238 | 2.395    | 0.011933 |
| C16orf58   | 0.929044 | 0.027894 | 0.983115 |
| DDX27      | 0.680152 | 0.183991 | 0.85545  |
| ZDHHHC12   | 0.500258 | 0.236427 | 0.745947 |
| C17orf59   | 0.759058 | 0.228193 | 0.896847 |
| ABHD17A    | 0.056154 | 0.983989 | 0.276683 |
| XAGE2      | 1        | -0.01279 | 1        |
| PAGE5      | 0.163438 | -0.35409 | 0.453012 |
| MARS2      | 0.855881 | 0.151    | 0.946993 |
| TCTN2      | 0.095807 | 0.330428 | 0.352331 |
| ATXN7L3B   | 0.667409 | 0.346332 | 0.848783 |
| MASTL      | 0.152726 | 0.505171 | 0.443165 |
| APIP       | 0.618461 | -0.31146 | 0.822194 |
| ZC2HC1A    | 0.699506 | 0.253903 | 0.864146 |
| LIN37      | 0.039777 | 0.756021 | 0.238337 |
| SLC41A3    | 0.364209 | -0.47483 | 0.646996 |
| SNF8       | 0.316049 | 0.21141  | 0.613139 |
| CENPN      | 0.141292 | 0.476972 | 0.427981 |
| MYO19      | 0.175405 | 0.725585 | 0.466796 |
| SLC25A44   | 0.813672 | -0.05524 | 0.924847 |
| ZC3HAV1L   | 0.050493 | 0.683775 | 0.263221 |
| POM121     | 0.924567 | 0.165127 | 0.981468 |
| TONSL      | 0.048699 | 0.853179 | 0.259424 |
| WDYHV1     | 0.902849 | 0.037745 | 0.971583 |
| PEX11G     | 0.561615 | 0.42804  | 0.788865 |
| PDLIM5     | 1.00E-06 | 0.907725 | 0.00015  |
| CRELD1     | 0.233812 | 0.20645  | 0.535403 |
| ACY3       | 0.260814 | -0.50625 | 0.56373  |
| ERO1L      | 0.038035 | 0.391055 | 0.233324 |
| SFRP2      | 1.30E-09 | 4.974984 | 1.33E-06 |
| TMEM19     | 0.988567 | -0.00251 | 1        |
| GRAMD3     | 0.020498 | 1.596304 | 0.170803 |
| SENP5      | 0.675707 | 0.223421 | 0.85327  |
| MS4A3      | 0.167504 | 0.919623 | 0.457358 |
| C7orf55    | 0.398866 | -0.26823 | 0.676219 |
| SH3YL1     | 0.808103 | -0.10941 | 0.921586 |
| AHCYL2     | 0.1915   | -0.44144 | 0.485658 |
| DOCK6      | 0.419078 | 0.241184 | 0.688796 |
| OXNAD1     | 0.012687 | 1.541401 | 0.13791  |
| TMEM176A   | 0.079293 | 0.40411  | 0.32578  |
| CDKN2AIPNL | 0.274246 | 0.933236 | 0.577625 |
| MED30      | 0.928956 | -0.20299 | 0.983115 |
| NAF1       | 0.111992 | -0.95506 | 0.382523 |
| REEP6      | 0.256192 | 1.292653 | 0.559666 |
| PGAM5      | 0.364426 | 0.199921 | 0.646996 |
| SGSM3      | 0.354411 | -0.39528 | 0.63835  |
| TMEM41A    | 0.194887 | 0.542336 | 0.488911 |
| INTS4      | 0.006911 | 0.673448 | 0.099675 |
| DDRKG1     | 0.14042  | 0.244651 | 0.426568 |
| DHTKD1     | 0.76912  | 0.168419 | 0.901915 |

|          |          |          |          |
|----------|----------|----------|----------|
| SCLY     | 0.960543 | 0.381029 | 0.994122 |
| PYURF    | 0.048094 | -1.33341 | 0.257798 |
| FUBP3    | 0.744041 | 0.09307  | 0.888303 |
| RBM17    | 0.286754 | 0.488678 | 0.590053 |
| PPP1R16A | 0.642109 | 0.123588 | 0.835764 |
| TMEM141  | 0.301331 | -0.84857 | 0.603275 |
| WBSCR16  | 0.853471 | 0.003121 | 0.946774 |
| NARS2    | 0.581788 | -0.12461 | 0.797998 |
| GPATCH3  | 0.241325 | 0.378127 | 0.544139 |
| SUCLG2   | 0.060574 | -0.23954 | 0.287134 |
| AJUBA    | 0.642079 | 0.378115 | 0.835764 |
| FBXL20   | 0.400321 | 0.303313 | 0.67622  |
| LRCH3    | 0.028293 | 0.6008   | 0.203235 |
| GMPPA    | 0.317645 | 0.277052 | 0.613139 |
| TMEM101  | 0.032252 | 1.532039 | 0.215938 |
| BOD1     | 0.97705  | 0.001531 | 0.999305 |
| GMCL1    | 0.322271 | -0.29438 | 0.613404 |
| FAM46A   | 0.274038 | 0.410922 | 0.577625 |
| VSIG2    | 0.139571 | -0.86591 | 0.426206 |
| ZNF414   | 0.067371 | 0.688636 | 0.302148 |
| ZNF845   | 0.045349 | 0.719188 | 0.250872 |
| ABHD14B  | 0.083367 | -0.36824 | 0.332962 |
| NGLY1    | 0.061021 | 0.652098 | 0.28873  |
| FAXDC2   |          | 0        |          |
| SEC22A   | 0.195232 | 0.505689 | 0.489337 |
| USMG5    | 0.764084 | 0.031625 | 0.899242 |
| NSL1     | 0.048254 | 1.319059 | 0.257919 |
| CPB2     | 0.003018 | 1.905483 | 0.062294 |
| PAWR     | 0.004516 | 0.950917 | 0.077667 |
| RBM41    | 0.096712 | 0.574181 | 0.354489 |
| RSRC1    | 0.112838 | 0.945739 | 0.382833 |
| THOC3    | 0.45805  | 0.354133 | 0.715224 |
| ITCH     | 0.015914 | 0.392841 | 0.153751 |
| TXNDC15  | 0.110812 | 0.205168 | 0.380148 |
| KIRREL   | 0.000971 | 1.473811 | 0.029997 |
| EPSTI1   | 0.163707 | 0.734658 | 0.453012 |
| LRIG1    | 0.126143 | 0.807872 | 0.403301 |
| COG3     | 0.147661 | 0.283172 | 0.436386 |
| CDK5RAP3 | 0.61848  | 0.069518 | 0.822194 |
| LOXL4    | 0.468054 | -0.20835 | 0.722799 |
| VPS39    | 0.078771 | 0.312995 | 0.32578  |
| CCDC132  | 0.255193 | 0.221974 | 0.557593 |
| MAGED4   | 0.222683 | 0.713157 | 0.52127  |
| VCPIP1   | 0.025131 | 0.502423 | 0.191949 |
| RADIL    | 0.284348 | -0.44175 | 0.587721 |
| SPG11    | 0.204174 | 0.182861 | 0.497963 |
| ELMO2    | 0.001332 | 0.467786 | 0.036119 |
| TMX3     | 0.33388  | 0.16562  | 0.620902 |
| DCAF5    | 0.406926 | 0.472771 | 0.680612 |
| ZNF462   | 0.902287 | 0.0116   | 0.971583 |
| CHAMP1   | 0.027821 | 0.742932 | 0.202072 |
| L3MBTL3  | 0.8257   | 0.077897 | 0.930864 |
| LCOR     | 0.109712 | 0.496193 | 0.377423 |
| MYO15B   | 0.74145  | 0.074721 | 0.887483 |
| ZFP91    | 0.552104 | -0.01727 | 0.783041 |
| DCHS1    | 0.19855  | 0.286709 | 0.49217  |
| CLMN     | 0.077627 | 0.823735 | 0.324641 |
| SERAC1   | 0.773543 | -0.15856 | 0.903913 |

|          |          |          |          |
|----------|----------|----------|----------|
| PDLIM2   | 0.400346 | 0.049565 | 0.67622  |
| FAR2     | 0.092612 | 0.333618 | 0.347013 |
| BTF3L4   | 0.026002 | 0.913358 | 0.193808 |
| RNF170   | 0.965801 | 0.20114  | 0.99616  |
| ZFYVE19  | 0.166342 | 0.896021 | 0.457139 |
| SLC35E1  | 0.754042 | 0.039339 | 0.894351 |
| TMEM87B  | 0.010997 | 0.965537 | 0.127049 |
| ZNF668   | 0.683433 | 0.254097 | 0.85709  |
| ZBTB45   | 0.883203 | -0.00684 | 0.962618 |
| USP47    | 0.218632 | 0.224348 | 0.515816 |
| CLPTM1L  | 0.070198 | 0.449473 | 0.309184 |
| PBK      | 0.299972 | 0.631983 | 0.602797 |
| ARL5B    | 0.193885 | 0.778799 | 0.488275 |
| DNAJC1   | 0.060574 | 0.552073 | 0.287134 |
| SCYL1    | 0.367925 | 0.132462 | 0.650718 |
| COX4I2   | 0.858289 | 0.078057 | 0.949081 |
| ZNF512B  | 0.329491 | 0.562544 | 0.619341 |
| FAM84B   | 0.340494 | -0.85617 | 0.627258 |
| CNDP1    | 0.830329 | -0.22544 | 0.933615 |
| PKNOX2   | 0.322009 | 0.113089 | 0.613139 |
| EXOC2    | 0.466082 | 0.104984 | 0.721065 |
| CNDP2    | 0.684992 | 0.092057 | 0.85709  |
| PPP1R13B | 0.357326 | -0.46872 | 0.641472 |
| EHMT2    | 0.010194 | 0.598083 | 0.121876 |
| ZFR      | 0.04253  | 0.437926 | 0.243142 |
| FAM210B  | 0.314759 | 0.880168 | 0.612778 |
| FAM167A  | 0.186982 | -0.36751 | 0.479162 |
| B3GALT6  | 0.225978 | 0.649506 | 0.525131 |
| NSD1     | 0.952829 | -0.27132 | 0.993074 |
| EP400    | 0.0662   | 0.865195 | 0.300455 |
| SNX27    | 0.021897 | 0.301315 | 0.176756 |
| KIF16B   | 0.442875 | 0.514921 | 0.704334 |
| ALPK3    | 0.632969 | 0.247642 | 0.831194 |
| FCRL2    | 0.161733 | 0.335529 | 0.453012 |
| PRMT6    | 0.375073 | 0.413353 | 0.656867 |
| IFT74    | 0.96549  | 0.032369 | 0.99616  |
| SIGLEC10 | 0.867668 | -0.13073 | 0.954126 |
| TRIM47   | 0.135171 | 0.459342 | 0.417833 |
| SENP8    | 0.212869 | -0.80215 | 0.509228 |
| CNOT6L   | 0.884406 | -0.14155 | 0.963599 |
| DHRS1    | 0.78936  | 0.125536 | 0.911483 |
| UBXN10   | 0.26324  | -0.32914 | 0.565873 |
| DNAJC30  | 0.9027   | 0.045633 | 0.971583 |
| UBE2E2   | 0.018778 | 1.809132 | 0.165951 |
| SAMD8    | 0.810389 | -0.14381 | 0.921889 |
| C9orf72  | 0.313777 | 0.507352 | 0.612263 |
| RNPC3    | 0.73481  | 0.26682  | 0.883541 |
| C9orf89  | 0.333874 | 0.346873 | 0.620902 |
| ZSCAN31  | 0.331051 | -0.3846  | 0.619341 |
| RMDN2    | 0.038957 | -0.49109 | 0.236232 |
| PRRC1    | 0.004071 | 0.510621 | 0.072359 |
| TBATA    | 0.155961 | 0.748671 | 0.44616  |
| CCDC114  | 0.533465 | -0.16224 | 0.7709   |
| CFAP53   | 0.722377 | -0.14367 | 0.876654 |
| KLHL15   | 0.021806 | 0.419941 | 0.176756 |
| FGD4     | 0.074893 | -0.79042 | 0.318717 |
| PACRG    | 0.169846 | -0.37802 | 0.461029 |
| AK8      | 1        | -0.02454 | 1        |

|          |          |          |          |
|----------|----------|----------|----------|
| HIAT1    | 0.417598 | -0.37105 | 0.688506 |
| C12orf66 | 0.912516 | 0.214307 | 0.975706 |
| FBXL18   | 0.267753 | 0.314994 | 0.570195 |
| ZNF512   | 0.687409 | 0.451275 | 0.858864 |
| COQ10A   | 0.175422 | -0.33632 | 0.466796 |
| NSMCE2   | 0.033781 | 1.467415 | 0.221141 |
| JSRP1    | 0.41554  | 0.525153 | 0.686235 |
| NDNL2    | 0.508197 | 0.390929 | 0.752425 |
| PCMTD1   | 0.655653 | 0.446245 | 0.84209  |
| HEXIM2   | 0.461622 | 0.266297 | 0.718747 |
| TMEM68   | 0.581701 | 0.176476 | 0.797998 |
| PPM1M    | 0.550476 | 0.161253 | 0.781327 |
| FAM20A   | 0.063249 | 1.078941 | 0.294055 |
| HSPA12B  | 0.496874 | -0.62501 | 0.743802 |
| HS6ST2   | 0.942152 | 0.008737 | 0.988404 |
| KCTD7    | 0.894479 | -0.01088 | 0.968626 |
| CFAP57   | 0.213217 | -0.42449 | 0.509228 |
| RNF145   | 0.516723 | -0.22864 | 0.758769 |
| CEP63    | 0.285717 | 0.243536 | 0.590053 |
| YTHDC1   | 0.960544 | -0.04824 | 0.994122 |
| KREMEN1  | 0.696781 | -0.04002 | 0.863213 |
| TMEM56   | 0.659408 | 0.237977 | 0.844416 |
| CCDC43   | 0.023327 | 1.301004 | 0.184409 |
| COG8     | 0.121914 | 0.546477 | 0.397343 |
| ZNF48    | 0.045973 | 0.497996 | 0.252361 |
| WDR92    | 0.011635 | 0.734291 | 0.129699 |
| NOL4L    | 0.402321 | 0.492989 | 0.678038 |
| VSTM2L   | 0.074408 | 1.636601 | 0.317894 |
| C7orf26  | 0.020759 | 1.538718 | 0.172048 |
| ENTHD2   | 0.771489 | 0.121187 | 0.903336 |
| TTC14    | 0.044336 | 0.771094 | 0.24851  |
| PWWP2A   | 0.101385 | 0.69963  | 0.362378 |
| MBOAT7   | 0.923804 | 0.009726 | 0.980751 |
| DOCK7    | 0.000759 | 0.69257  | 0.025904 |
| UROC1    | 0.319672 | -0.21319 | 0.613139 |
| SPATA13  | 0.1865   | 0.640886 | 0.479026 |
| RILP     | 0.219436 | -0.75541 | 0.517271 |
| TSNARE1  | 0.43065  | 0.105733 | 0.695651 |
| FOPNL    | 0.065617 | 0.677581 | 0.299507 |
| SFXN2    | 0.143691 | -0.99517 | 0.431666 |
| ZNF830   | 0.007612 | 2.018762 | 0.10525  |
| ZMAT2    | 0.249041 | -0.04607 | 0.552533 |
| FAM210A  | 0.421637 | 0.405177 | 0.691467 |
| FRMD6    | 1.80E-05 | 2.568039 | 0.001573 |
| TTC25    | 0.79259  | -0.10883 | 0.913596 |
| N/A      | 0.331588 | -0.16276 | 0.619341 |
| SCLT1    | 0.234942 | -0.20608 | 0.537046 |
| C8orf37  | 0.739382 | 0.216186 | 0.886294 |
| CCDC115  | 0.876774 | 0.376481 | 0.958859 |
| NAP1L5   | 0.52506  | 0.319839 | 0.764479 |
| SLC46A1  | 0.641107 | 0.46278  | 0.835764 |
| ANKRD27  | 0.039553 | 0.837132 | 0.237431 |
| CLIC6    | 0.382127 | -0.59916 | 0.661698 |
| PVRL4    | 0.728303 | 0.19999  | 0.879656 |
| PRAP1    | 0.670768 | -0.1185  | 0.850681 |
| BIRC8    | 0.244375 | -0.4689  | 0.547425 |
| NSUN5    | 0.376165 | 0.603114 | 0.657741 |
| RPRD1A   | 0.238962 | 0.591124 | 0.541047 |

|           |          |          |          |
|-----------|----------|----------|----------|
| FCRL3     | 0.26299  | -1.46004 | 0.565873 |
| COL21A1   | 0.485519 | 0.169868 | 0.736044 |
| AGAP3     | 0.320823 | 0.622663 | 0.613139 |
| ARAP1     | 0.020781 | 0.330555 | 0.172048 |
| ACAP3     | 0.904949 | -0.2184  | 0.972966 |
| WDFY2     | 0.014512 | 1.459768 | 0.147184 |
| SERPINB12 | 0.09909  | 0.517186 | 0.358568 |
| IPO9      | 0.006775 | 0.644455 | 0.098484 |
| CASD1     | 0.935162 | -0.04542 | 0.984984 |
| AP1S3     | 0.543819 | 0.653839 | 0.777449 |
| MIA2      | 0.247021 | 0.293999 | 0.549922 |
| DCBLD2    | 0.018531 | 1.164757 | 0.165084 |
| PGLYRP2   | 0.317645 | 0.263479 | 0.613139 |
| GPR124    | 0.15336  | 0.511787 | 0.443292 |
| ARHGEF17  | 0.051278 | 0.475858 | 0.265139 |
| INPP4A    | 0.089413 | 0.537568 | 0.341477 |
| MCEE      | 0.171095 | -0.80136 | 0.461822 |
| RBM14     | 0.216173 | 0.222245 | 0.512741 |
| SCGB3A2   | 0.245732 | -1.25792 | 0.549743 |
| ERMAP     | 0.845899 | -0.02118 | 0.942239 |
| RCHY1     | 0.10622  | -0.98975 | 0.370932 |
| ZNF385A   | 0.26368  | 0.349419 | 0.565913 |
| GBP5      | 0.939498 | 0.00511  | 0.986498 |
| GBP4      | 0.801372 | -0.07107 | 0.91752  |
| SORCS2    | 0.372466 | 0.22118  | 0.655575 |
| SIGLEC12  | 0.967597 | -0.16491 | 0.997177 |
| KLHL5     | 0.004311 | 0.727312 | 0.075057 |
| UHRF2     | 0.313375 | -0.04715 | 0.611585 |
| NEDD4L    | 0.651389 | -0.08251 | 0.839222 |
| QKI       | 0.019032 | 0.289941 | 0.166597 |
| PNMA5     | 0.116303 | 0.604129 | 0.389223 |
| LENG8     | 0.186018 | 0.293482 | 0.478129 |
| CCDC85A   | 0.15526  | 0.254045 | 0.444958 |
| PLEKHG4B  | 0.603077 | 0.266183 | 0.812922 |
| FMNL2     | 0.330591 | 0.338128 | 0.619341 |
| NEK1      | 0.138594 | 0.542547 | 0.424105 |
| PUS7      | 0.78934  | 0.210254 | 0.911483 |
| FAM111A   | 0.1263   | 0.850097 | 0.403572 |
| TRAPPC9   | 0.623137 | 0.07565  | 0.825978 |
| PLIN4     | 0.954544 | -0.15249 | 0.993074 |
| BTBD9     | 0.242992 | 0.674785 | 0.546608 |
| TRNT1     | 0.051278 | 0.212178 | 0.265139 |
| SMG1      | 0.103963 | 0.754761 | 0.366863 |
| ALS2      | 0.161065 | 0.422348 | 0.453012 |
| TMEM237   | 0.188151 | 0.462122 | 0.480067 |
| DERL3     | 0.13821  | 1.072152 | 0.42406  |
| ALKBH3    | 0.792231 | -0.09777 | 0.913596 |
| GSDMA     | 0.575621 | 0.142852 | 0.796634 |
| DLC1      | 0.552521 | 0.277384 | 0.783393 |
| PPP1R10   | 0.04253  | 0.632291 | 0.243142 |
| SLC38A2   | 0.371397 | 0.639658 | 0.65423  |
| FYTTD1    | 0.142921 | 0.388666 | 0.430602 |
| SLC2A13   | 0.690274 | -0.12337 | 0.859723 |
| TEFM      | 0.167194 | 0.917725 | 0.457187 |
| RAB3IP    | 0.468807 | -0.43927 | 0.723565 |
| MTMR9     | 0.009626 | 1.036489 | 0.118893 |
| PRAM1     | 0.343863 | 0.352807 | 0.630156 |
| VPS35     | 0.992106 | -0.02156 | 1        |

|           |          |          |          |
|-----------|----------|----------|----------|
| SMIM14    | 0.96601  | 0.06778  | 0.996282 |
| ALPK1     | 0.219547 | -0.46762 | 0.517425 |
| SCGB3A1   | 0.213895 | -1.49346 | 0.509407 |
| PURB      | 0.568296 | 0.225619 | 0.791838 |
| TRPM7     | 0.671991 | 0.100138 | 0.851286 |
| PHF12     | 0.225738 | 0.64162  | 0.525131 |
| XPO6      | 0.261801 | 0.815064 | 0.56535  |
| HHIP      | 0.541937 | -0.1812  | 0.775521 |
| MAGI1     | 0.368403 | -0.33953 | 0.651252 |
| RBP7      | 0.993518 | -0.08215 | 1        |
| SPAG5     | 0.409632 | 0.399076 | 0.682657 |
| PANX1     | 0.07804  | 0.980762 | 0.325635 |
| FCRL5     | 0.816718 | -0.27074 | 0.926577 |
| NACC1     | 0.470084 | -0.09081 | 0.72456  |
| SNX18     | 0.039276 | 0.402465 | 0.236232 |
| PASK      | 0.5823   | 0.265426 | 0.798306 |
| TNFRSF13C | 0.563678 | -0.15308 | 0.789479 |
| CIC       | 0.003486 | 1.470298 | 0.067901 |
| BBS4      | 0.369312 | 0.357714 | 0.652548 |
| UIMC1     | 0.223664 | 0.517384 | 0.521803 |
| VPS13A    | 0.947409 | -0.01633 | 0.990063 |
| MED15     | 0.015038 | 1.177769 | 0.150049 |
| GAL3ST4   | 0.320105 | 1.009323 | 0.613139 |
| GFM1      | 0.255193 | 0.085541 | 0.557593 |
| ERGIC2    | 0.033952 | 0.331553 | 0.221141 |
| MCCC1     | 0.208914 | -0.24315 | 0.503054 |
| IL4I1     | 0.077655 | 0.454418 | 0.324641 |
| CAMKK2    | 0.661309 | 0.245488 | 0.844736 |
| TGS1      | 0.198885 | 0.565554 | 0.49217  |
| NUDCD1    | 0.528742 | 0.068581 | 0.767576 |
| ERBB2IP   | 0.378546 | -0.14681 | 0.659304 |
| TUBGCP6   | 0.011382 | 1.499892 | 0.128971 |
| TUBGCP5   | 0.085294 | 1.005441 | 0.335537 |
| USP28     | 0.159044 | 0.924061 | 0.449897 |
| FNBP1     | 0.213733 | 0.27117  | 0.509228 |
| TRIB1     | 0.540968 | 0.205369 | 0.775521 |
| HMCN1     | 0.260731 | -0.34293 | 0.56373  |
| IFT140    | 0.143106 | 0.596297 | 0.430717 |
| LMF1      | 0.595383 | 0.321416 | 0.806337 |
| WDR24     | 0.729504 | -0.21559 | 0.880023 |
| JMJD8     | 0.21436  | 0.619841 | 0.510276 |
| C16orf13  | 0.746536 | 0.006192 | 0.889644 |
| RAB40C    | 0.689054 | -0.1968  | 0.859429 |
| RPS6KC1   | 0.019823 | 0.875932 | 0.168605 |
| TP53RK    | 0.194929 | 0.226745 | 0.488911 |
| PIGS      | 0.007333 | 0.466364 | 0.102825 |
| WRNIP1    | 0.172129 | 0.379543 | 0.463481 |
| RANBP9    | 0.004805 | 0.541923 | 0.081112 |
| CLCC1     | 0.442223 | 0.203918 | 0.703704 |
| UBL7      | 0.001623 | 2.376613 | 0.041669 |
| HAPLN3    | 0.01237  | 1.837253 | 0.135707 |
| LYSMD1    | 0.310183 | 0.234295 | 0.609864 |
| CCNL2     | 0.147228 | 0.677091 | 0.436386 |
| PEBP4     | 0.698835 | -0.25524 | 0.864146 |
| MYADM     | 0.000236 | 0.858693 | 0.011882 |
| PLEKHF1   | 0.462056 | 0.063484 | 0.718747 |
| SERINC2   | 0.455572 | 0.268239 | 0.71417  |
| PPP1R9B   | 0.01039  | 0.440237 | 0.123374 |



|                     |          |          |          |
|---------------------|----------|----------|----------|
| SRPK1               | 0.577274 | 0.131012 | 0.796634 |
| SMC6                | 0.478207 | 0.003617 | 0.730754 |
| KCTD15              | 0.361932 | 0.539046 | 0.645575 |
| STRBP               | 0.934288 | 0.29919  | 0.984157 |
| TSPAN18             | 0.146521 | -0.8395  | 0.435629 |
| TMEM209             | 0.378546 | 0.038337 | 0.659304 |
| DIRC2               | 0.013129 | 1.442604 | 0.140278 |
| GPX7                | 2.44E-06 | 2.182362 | 0.000298 |
| CPXM1               | 3.28E-07 | 3.734028 | 6.50E-05 |
| ORAI2               | 0.175422 | -0.40699 | 0.466796 |
| CDK5RAP2            | 0.34596  | 0.537003 | 0.632606 |
| CYP2S1              | 0.835394 | 0.38273  | 0.935999 |
| IWS1                | 0.440254 | 0.419564 | 0.70314  |
| SIN3A               | 0.072266 | 0.279518 | 0.313701 |
| CEP89               | 0.301599 | 0.598173 | 0.603275 |
| OSBPL9              | 0.981581 | -0.05798 | 1        |
| CRBN                | 0.129527 | 0.833852 | 0.410218 |
| VWA9                | 0.068176 | 0.78536  | 0.303928 |
| ADO                 | 0.595344 | 0.094816 | 0.806337 |
| CDK5RAP1            | 0.155375 | 0.648573 | 0.445058 |
| MAP7D2              | 0.175307 | 0.569646 | 0.466796 |
| SECISBP2            | 0.346277 | 0.233963 | 0.632606 |
| RSF1                | 0.442223 | 0.237354 | 0.703704 |
| RBM15               | 0.101186 | 0.550739 | 0.361901 |
| PPP1R16B            | 0.452579 | 0.236134 | 0.712397 |
| RUFY1               | 0.450097 | 0.093849 | 0.709598 |
| IMMP2L              | 0.087124 | 1.020718 | 0.3381   |
| KCNK17              | 0.079293 | 0.306167 | 0.32578  |
| SPEN                | 0.05285  | 0.697406 | 0.269122 |
| PNKP                | 0.327323 | 0.102012 | 0.617719 |
| NMNAT3              | 0.031342 | -1.36407 | 0.212999 |
| MMS19               | 0.025563 | 0.487379 | 0.193268 |
| SLC9A7              | 0.68741  | -0.30204 | 0.858864 |
| UHRF1               | 0.025741 | 1.683369 | 0.193808 |
| FAM129B             | 0.887225 | -0.02685 | 0.96416  |
| YME1L1              | 0.034511 | 0.412692 | 0.222148 |
| RMDN3               | 0.960544 | 0.080774 | 0.994122 |
| TCF12               | 0.33682  | 0.445559 | 0.624371 |
| MUC4                | 1        | -0.14513 | 1        |
| MYCBP               | 0.627809 | 0.133831 | 0.828932 |
| CYTH2               | 0.229894 | 0.687534 | 0.529875 |
| ACOX2               | 0.591789 | -0.36299 | 0.805934 |
| TBCB                | 0.498977 | 0.183857 | 0.744839 |
| PSMB7               | 0.744041 | 0.046355 | 0.888303 |
| CNN2                | 5.77E-06 | 0.796324 | 0.000627 |
| SEC62               | 0.277896 | 0.525123 | 0.579677 |
| PCYT2               | 0.185996 | -0.19047 | 0.478129 |
| PHOX2B;DRGX;OTP;RAX | 0.609946 | -0.70251 | 0.817215 |
| CDC5L               | 0.094502 | 0.254805 | 0.349959 |
| PSMD1               | 0.197211 | 0.160848 | 0.490309 |
| NOTCH4              | 0.942624 | 0.054032 | 0.988547 |
| CD180               | 0.041842 | 0.866509 | 0.242066 |
| SDF2                | 0.006642 | 0.446089 | 0.097053 |
| PFDN5               | 0.364426 | 0.084497 | 0.646996 |
| PAFAH2              | 0.004996 | -1.2954  | 0.082994 |
| DDO                 | 0.369906 | -0.76756 | 0.653181 |
| AGAP2               | 0.470337 | -0.39583 | 0.724717 |
| RNF2                | 0.02184  | 1.258017 | 0.176756 |

|              |          |          |          |
|--------------|----------|----------|----------|
| PARK7        | 0.354055 | -0.20872 | 0.638094 |
| GAS2L1       | 0.018687 | 1.346325 | 0.165633 |
| EYA1         | 1        | -0.01098 | 1        |
| EYA3         | 0.016985 | 1.440151 | 0.157641 |
| FMO2         | 1        | -0.06711 | 1        |
| NEU1         | 0.015628 | 1.134635 | 0.152856 |
| SORT1        | 0.897655 | 0.005507 | 0.969793 |
| VAT1         | 0.563832 | 0.039847 | 0.789479 |
| LGMN         | 0.257958 | 0.282777 | 0.560462 |
| PLIN2        | 0.020065 | 0.803572 | 0.169555 |
| MMP19        | 0.00706  | 2.128082 | 0.10064  |
| DNAJC2       | 0.656099 | -0.47959 | 0.84209  |
| MPHOSPH6     | 0.983801 | -0.34353 | 1        |
| MPHOSPH8     | 0.01589  | 0.98753  | 0.153751 |
| NUP88        | 0.249724 | 0.155638 | 0.552833 |
| PKP4         | 0.051201 | -0.74695 | 0.265139 |
| PIK3R4       | 0.197211 | 0.251126 | 0.490309 |
| P2RX4        | 0.950035 | -0.00046 | 0.990863 |
| P2RX7        | 0.60065  | -0.15592 | 0.811031 |
| SERPINI1     | 0.898515 | -0.02015 | 0.970438 |
| POP1         | 0.42284  | 0.096052 | 0.691467 |
| TSC22D3      | 0.94561  | 0.11512  | 0.988945 |
| MNT          | 0.029335 | 1.101626 | 0.207066 |
| S100A13      | 0.181644 | -0.17388 | 0.472575 |
| SCAF11       | 0.084071 | 0.345974 | 0.334685 |
| TBX5         | 0.300882 | 0.165167 | 0.602797 |
| TEAD3        | 0.262528 | 0.735355 | 0.565873 |
| TIMM17A      | 0.253422 | 1.022442 | 0.557407 |
| TSNAX        | 0.559385 | 0.100786 | 0.78633  |
| NDN          | 0.571349 | 0.081059 | 0.793891 |
| SEPHS2       | 0.699584 | -0.06281 | 0.864146 |
| EIF3C;EIF3CL | 0.252448 | 0.061409 | 0.555643 |
| TTC1         | 0.442223 | 0.170205 | 0.703704 |
| DNAJC7       | 0.025131 | 0.344004 | 0.191949 |
| CDCA3        | 0.011513 | 0.803356 | 0.129242 |
| C12orf57     | 0.892438 | 0.319724 | 0.966699 |
| PHB2         | 0.426712 | -0.10529 | 0.693599 |
| SLC38A3      | 0.157319 | -0.55141 | 0.447277 |
| COPS8        | 0.211314 | 0.183938 | 0.506632 |
| PRPF18       | 0.063232 | 1.115324 | 0.294055 |
| RAD9A        | 0.054495 | 1.186529 | 0.273313 |
| PKMYT1       | 0.496019 | 0.238982 | 0.743024 |
| SDHC         | 0.12513  | 0.253306 | 0.401334 |
| OSMR         | 0.097679 | 0.847391 | 0.356252 |
| CHP1         | 0.830256 | 0.083453 | 0.933615 |
| KIF2C        | 0.01246  | 1.287428 | 0.136352 |
| CGREF1       | 0.03382  | 1.28267  | 0.221141 |
| ZNF184       | 0.482162 | 0.122784 | 0.733586 |
| MAP3K5       | 0.089397 | 0.614727 | 0.341477 |
| MGLL         | 0.177368 | -0.33762 | 0.468602 |
| LYST         | 0.771029 | -0.07153 | 0.903336 |
| ATXN2        | 0.020062 | 0.84642  | 0.169555 |
| DOK1         | 0.456995 | 0.302209 | 0.715224 |
| MTR          | 0.311224 | 0.380314 | 0.609894 |
| RBBP8        | 0.916225 | 0.091552 | 0.977854 |
| KCNJ15       | 0.333105 | -0.62568 | 0.620722 |
| HSD17B10     | 0.324076 | 0.150304 | 0.614309 |
| COL12A1      | 2.18E-08 | 2.119309 | 7.34E-06 |

|          |          |          |          |
|----------|----------|----------|----------|
| SMAD5    | 0.103849 | 0.938437 | 0.366863 |
| SEPTIN5  | 2.25E-05 | 1.397507 | 0.001867 |
| SIGMAR1  | 0.13509  | 1.152391 | 0.417833 |
| BARD1    | 0.768139 | 0.037632 | 0.901915 |
| HNRNPAB  | 0.223612 | 0.240211 | 0.521792 |
| CCL19    | 0.337382 | -0.77816 | 0.624587 |
| LITAF    | 0.968571 | 0.057783 | 0.997592 |
| NAP1L4   | 0.142204 | 0.189052 | 0.428816 |
| MGST2    | 0.796968 | 0.000255 | 0.915123 |
| NAPG     | 0.590866 | 0.065993 | 0.804875 |
| PIP5K1A  | 0.052831 | 1.180165 | 0.269122 |
| TXN2     | 0.830256 | 0.111651 | 0.933615 |
| ABCA3    | 0.027011 | -2.29984 | 0.198793 |
| MAP3K3   | 0.019431 | 0.743003 | 0.167517 |
| ATP5S    | 0.929042 | 0.533715 | 0.983115 |
| APBA2    | 0.011513 | 0.717982 | 0.129242 |
| CMKLR1   | 0.755165 | 0.203546 | 0.895527 |
| GPA33    | 0.447034 | 0.30694  | 0.707261 |
| MIPEP    | 0.861239 | -0.04912 | 0.950165 |
| ACO2     | 0.986843 | -0.00754 | 1        |
| TM9SF2   | 0.023466 | 0.320982 | 0.184845 |
| COQ7     | 0.00746  | -0.96407 | 0.10395  |
| SLC29A1  | 0.762625 | -0.45086 | 0.899242 |
| EPAS1    | 0.141811 | 0.586952 | 0.428816 |
| TSG101   | 0.101186 | 0.206695 | 0.361901 |
| CIB1     | 0.090665 | -0.4219  | 0.343901 |
| CPNE1    | 0.006131 | 0.413755 | 0.092018 |
| CCT7     | 0.286754 | -0.07114 | 0.590053 |
| MYD88    | 0.411524 | 0.120682 | 0.683152 |
| EBNA1BP2 | 0.559385 | 0.316591 | 0.78633  |
| ARID3A   | 0.369966 | 0.443446 | 0.653183 |
| HAUS7    | 0.021138 | 1.176123 | 0.173882 |
| PRMT1    | 0.012773 | 0.354036 | 0.137944 |
| BAG1     | 0.432447 | -0.15662 | 0.697404 |
| ATF6B    | 0.290886 | 0.651626 | 0.595133 |
| AGPAT1   | 0.2958   | 0.409872 | 0.598344 |
| EGFL8    | 0.331588 | -0.13812 | 0.619341 |
| PTPN18   | 0.904941 | -0.06411 | 0.972966 |
| DUSP9    | 0.556057 | 0.131534 | 0.783439 |
| FOXC2    | 0.736368 | -0.13359 | 0.884985 |
| PKP2     | 0.798178 | 0.231436 | 0.916038 |
| SH3GL1   | 0.021897 | 0.30648  | 0.176756 |
| SH3GL2   | 0.571349 | -0.05697 | 0.793891 |
| RARRES2  | 0.008409 | 0.306142 | 0.110127 |
| MYOC     | 0.163438 | -0.23163 | 0.453012 |
| TEP1     | 0.861239 | -0.1338  | 0.950165 |
| OMD      | 1.18E-06 | 4.466277 | 0.000169 |
| SEMA3C   | 0.003304 | 1.94381  | 0.065524 |
| VRK1     | 0.020419 | 0.84075  | 0.170514 |
| GDF15    | 0.946039 | -0.06879 | 0.989207 |
| AKAP9    | 0.950035 | 0.07518  | 0.990863 |
| DPYSL5   | 0.844559 | 0.261136 | 0.942239 |
| B9D2     | 0.859348 | 0.083346 | 0.949684 |
| P2RY13   | 0.748884 | -0.17238 | 0.890902 |
| NIPSNAP1 | 0.057044 | 0.298964 | 0.278658 |
| DHRS9    | 0.829237 | 0.208948 | 0.933615 |
| HSD17B14 | 0.183878 | -0.63587 | 0.474829 |
| NCAPG    | 0.881172 | -0.08508 | 0.961515 |

|          |          |          |          |
|----------|----------|----------|----------|
| ARPC5L   | 0.04896  | 0.326085 | 0.259694 |
| MICU1    | 0.515876 | -0.03699 | 0.757825 |
| C7orf25  | 0.032372 | 1.272179 | 0.216159 |
| FAM118B  | 0.178132 | 1.090584 | 0.469506 |
| HOPX     | 0.283779 | 0.068686 | 0.586874 |
| SPIN2B   | 0.481732 | 0.172596 | 0.733586 |
| PAIP2    | 0.093007 | 1.228516 | 0.347256 |
| MAPKAP1  | 0.384663 | 0.661144 | 0.66413  |
| RBM4B    | 0.453828 | 0.702697 | 0.712914 |
| KCTD14   | 0.249903 | -0.95649 | 0.553119 |
| NABP2    | 0.612202 | -0.42027 | 0.818853 |
| ZFYVE21  | 0.031483 | 1.644896 | 0.213823 |
| DDX50    | 0.118765 | 0.31661  | 0.392409 |
| MRPL34   | 0.971687 | 0.053195 | 0.997592 |
| SMIM7    | 0.339004 | 0.267825 | 0.626409 |
| PDCD1LG2 | 0.902917 | 0.101293 | 0.971583 |
| ELAC2    | 0.003368 | 0.462484 | 0.066236 |
| C19orf43 | 0.673609 | 1.108227 | 0.852854 |
| GRWD1    | 0.024286 | 0.525642 | 0.188496 |
| MACROD1  | 0.897655 | -0.12641 | 0.969793 |
| TCF25    | 0.020774 | 0.990766 | 0.172048 |
| CMSS1    | 0.688865 | -0.36596 | 0.859429 |
| TBL1Y    | 0.452579 | 0.198326 | 0.712397 |
| FAM110A  | 0.49063  | 0.127671 | 0.738656 |
| ECSIT    | 0.183798 | 0.349043 | 0.474829 |
| WDR77    | 0.164991 | 0.164741 | 0.454525 |
| C17orf62 | 0.151386 | 0.214439 | 0.44125  |
| SOST     | 0.393617 | 0.371319 | 0.671013 |
| VKORC1   | 0.159041 | 1.184034 | 0.449897 |
| DPH2     | 0.161599 | 0.570566 | 0.453012 |
| MRPL57   | 0.063784 | 1.574818 | 0.295622 |
| KXD1     | 0.637367 | 0.149499 | 0.833511 |
| FAM173A  | 0.971656 | 0.022809 | 0.997592 |
| TUBA1C   | 0.992106 | 0.002176 | 1        |
| VIMP     | 0.874203 | -0.45783 | 0.957716 |
| APOL2    | 0.016499 | 0.652219 | 0.155558 |
| BCL7B    | 0.593889 | -0.30174 | 0.806337 |
| SEN7     | 0.010684 | 1.145501 | 0.125661 |
| MYBBP1A  | 0.049723 | 0.41424  | 0.261364 |
| NUDT12   | 0.721208 | -0.05931 | 0.876242 |
| AIF1L    | 0.001255 | -2.06109 | 0.03481  |
| NRIP2    | 0.879869 | -0.09029 | 0.961441 |
| TMEM47   | 0.659619 | -0.33967 | 0.844589 |
| LPIN3    | 0.939698 | 0.034526 | 0.986525 |
| FERMT1   | 0.565021 | 0.414986 | 0.790883 |
| MGME1    | 0.068855 | 1.255397 | 0.30645  |
| GORASP1  | 0.666962 | 0.328441 | 0.848454 |
| SYT15    | 0.020356 | -1.01296 | 0.170514 |
| HEPH     | 1.63E-08 | 2.812589 | 6.25E-06 |
| FYCO1    | 0.450097 | -0.07138 | 0.709598 |
| SLC25A21 | 0.062424 | 1.360505 | 0.292127 |
| CLSTN3   | 0.217477 | 0.573207 | 0.514844 |
| ZSWIM1   | 0.167109 | 0.304092 | 0.457139 |
| JPH2     | 0.658522 | 0.136344 | 0.843575 |
| ACBD6    | 0.009408 | 1.70483  | 0.11751  |
| CORO1B   | 0.343873 | 0.047212 | 0.630156 |
| CCDC77   | 0.095031 | 0.846536 | 0.35136  |
| NAA38    | 0.45935  | 0.456802 | 0.716923 |

|                         |          |          |          |
|-------------------------|----------|----------|----------|
| TXNDC17                 | 0.641914 | -0.12827 | 0.835764 |
| PIGQ                    | 0.513141 | 0.25438  | 0.75581  |
| BUD13                   | 0.475807 | 0.575538 | 0.728899 |
| CPPED1                  | 0.533067 | 0.177558 | 0.7709   |
| VPS25                   | 0.378546 | 0.301746 | 0.659304 |
| SH2D3A                  | 0.400605 | -0.39034 | 0.676417 |
| MRPL45                  | 0.675323 | -0.31338 | 0.853175 |
| C7orf50                 | 0.239021 | -0.94228 | 0.541047 |
| NUDT16L1                | 0.764084 | -0.04537 | 0.899242 |
| MXRA8                   | 0.002834 | 1.891069 | 0.060074 |
| LZTS2                   | 0.851252 | -0.16321 | 0.945258 |
| SDF4                    | 0.011636 | 0.556583 | 0.129699 |
| SRSF8                   | 0.224762 | -0.66671 | 0.523815 |
| TM2D3                   | 0.019587 | 1.718705 | 0.1684   |
| PDCD2L                  | 0.425473 | 0.451786 | 0.693599 |
| PAAF1                   | 0.033636 | 1.553814 | 0.220876 |
| WIBG                    | 0.825116 | 0.021738 | 0.930395 |
| PYGO2                   | 0.116368 | 1.11753  | 0.389223 |
| CHCHD6                  | 0.367923 | 0.12676  | 0.650718 |
| AIFM2                   | 0.576975 | 1.037216 | 0.796634 |
| ADPGK                   | 0.041202 | 0.333901 | 0.240826 |
| GPATCH1                 | 0.002086 | 1.758079 | 0.048476 |
| ARHGAP9                 | 0.034149 | 0.554742 | 0.221721 |
| RIOK1                   | 0.439669 | 0.905093 | 0.70314  |
| UQCC2                   | 0.289748 | -0.23275 | 0.593134 |
| MIEN1                   | 0.986841 | 0.144533 | 1        |
| LLPH                    | 0.151842 | 1.405666 | 0.442015 |
| CBWD1;CBWD5;CBWD3;CBWD6 | 0.14131  | 0.756015 | 0.427981 |
| GIN54                   | 0.784838 | 0.132776 | 0.909861 |
| UTP23                   | 0.497382 | -0.20968 | 0.744361 |
| SLC50A1                 | 0.188058 | 0.765348 | 0.480067 |
| SIKE1                   | 0.960323 | 0.142524 | 0.994122 |
| PELO                    | 0.018368 | 0.88836  | 0.163766 |
| GIN53                   | 0.818809 | 0.16265  | 0.92687  |
| FAM213A                 | 0.764084 | 0.019798 | 0.899242 |
| WDR83                   | 0.028406 | 1.448536 | 0.20366  |
| SLC39A3                 | 0.933487 | 0.063339 | 0.984157 |
| TRIM56                  | 0.046008 | 0.266955 | 0.252361 |
| CENPK                   | 0.047453 | 0.913708 | 0.255923 |
| ANAPC13                 | 0.396112 | 0.452816 | 0.67382  |
| ERP44                   | 0.78936  | 0.05848  | 0.911483 |
| LXN                     | 0.20535  | 0.25707  | 0.49957  |
| NIPSNAP3B               | 0.677236 | 0.066123 | 0.854325 |
| TTYH2                   | 0.488557 | -0.33895 | 0.738428 |
| TMEM175                 | 0.860114 | 0.192124 | 0.950165 |
| ATG101                  | 0.430785 | 0.57514  | 0.69569  |
| NOL10                   | 0.050102 | 0.767299 | 0.26298  |
| NTPCR                   | 0.206529 | 0.062966 | 0.500256 |
| AGMAT                   | 0.154635 | 0.634422 | 0.444958 |
| C2orf88                 | 0.334121 | 0.497063 | 0.621039 |
| C19orf52                | 0.382127 | 0.140093 | 0.661698 |
| RTBDN                   | 0.331588 | -0.16577 | 0.619341 |
| TACO1                   | 0.54177  | -0.19362 | 0.775521 |
| HDHD3                   | 0.67051  | -0.09139 | 0.850681 |
| TINF2                   | 0.479044 | 0.350729 | 0.731627 |
| TUBGCP2                 | 0.001956 | 0.528513 | 0.04685  |
| C17orf80                | 0.096685 | 0.996269 | 0.354489 |
| ESYT1                   | 0.11568  | 0.180367 | 0.387731 |

|          |          |          |          |
|----------|----------|----------|----------|
| UBAC1    | 0.934273 | 0.421069 | 0.984157 |
| TMEM204  | 0.251789 | 0.574128 | 0.555643 |
| CCM2     | 0.002543 | 0.961876 | 0.055387 |
| YIPF4    | 0.656099 | 0.323242 | 0.84209  |
| RTKN     | 0.226028 | 0.795343 | 0.525131 |
| C16orf70 | 0.002401 | 1.502524 | 0.053253 |
| NAA11    | 0.988991 | 0.014197 | 1        |
| TSEN34   | 0.528478 | -0.26252 | 0.767576 |
| CRACR2A  | 0.518774 | 0.476218 | 0.760272 |
| SYT17    | 0.081481 | -0.75017 | 0.329697 |
| CHCHD5   | 0.011508 | -1.59975 | 0.129242 |
| DESI2    | 0.013631 | 1.839276 | 0.14262  |
| CNPY3    | 0.660922 | 0.049671 | 0.844596 |
| MTG1     | 0.500098 | -0.67832 | 0.74591  |
| ALG1     | 0.360948 | 0.119224 | 0.644411 |
| LIMD2    | 0.22839  | 0.99695  | 0.528484 |
| HAUS8    | 0.002587 | 1.912175 | 0.056149 |
| ALKBH7   | 0.115663 | 0.999416 | 0.387731 |
| INPP5K   | 0.986843 | -0.23075 | 1        |
| POLR3GL  | 0.884736 | 0.13485  | 0.963721 |
| NDFIP1   | 0.391035 | 0.838964 | 0.669698 |
| PSMG3    | 0.98684  | 0.01158  | 1        |
| UPK3B    | 0.57907  | -0.17815 | 0.796675 |
| COPS4    | 0.364426 | 0.111978 | 0.646996 |
| TCHP     | 0.080213 | 0.98378  | 0.326714 |
| WAC      | 0.000821 | 2.121242 | 0.027117 |
| DIDO1    | 0.089414 | 0.449777 | 0.341477 |
| MTA3     | 0.15272  | 0.637549 | 0.443165 |
| RBM42    | 0.154226 | 0.383046 | 0.444958 |
| DCTN5    | 0.517819 | -0.45407 | 0.760014 |
| MCMBP    | 0.025131 | 0.448871 | 0.191949 |
| AARSD1   | 0.045294 | 0.669793 | 0.250872 |
| DCUN1D5  | 0.439212 | 0.4815   | 0.702726 |
| PAGR1    | 0.431223 | 0.521253 | 0.696172 |
| FAM103A1 | 0.035654 | 1.180014 | 0.225452 |
| URM1     | 0.009344 | 0.502391 | 0.117105 |
| ANP32E   | 0.017726 | 0.557362 | 0.161012 |
| MED10    | 0.000734 | 1.717825 | 0.02568  |
| LRRC1    | 0.407773 | 0.059127 | 0.680612 |
| PI4K2A   | 0.130075 | 0.328352 | 0.410899 |
| TMEM43   | 0.029749 | 0.249227 | 0.208169 |
| FSD1     | 0.157319 | 0.56099  | 0.447277 |
| DPH7     | 0.095807 | 0.400424 | 0.352331 |
| TBCD     | 0.135171 | 0.326541 | 0.417833 |
| NDC1     | 0.936911 | 0.054542 | 0.986451 |
| TMEM208  | 0.031613 | 1.565043 | 0.214187 |
| TTPAL    | 0.799685 | 0.093412 | 0.916176 |
| FUCA2    | 0.051666 | 0.719696 | 0.266309 |
| HGH1     | 0.48231  | 0.087791 | 0.733586 |
| DHRS4    | 0.039276 | 0.028726 | 0.236232 |
| THTPA    | 0.173032 | 1.161482 | 0.464476 |
| LMF2     | 0.048208 | 0.335877 | 0.257798 |
| CHRD1    | 0.507724 | -0.6053  | 0.75191  |
| NDUFAF3  | 0.724155 | 0.158209 | 0.876654 |
| CENPO    | 0.15526  | 0.221181 | 0.444958 |
| PRR15L   | 0.902553 | -0.04059 | 0.971583 |
| MMTAG2   | 0.42777  | 0.034447 | 0.69482  |
| TMEM243  | 0.560494 | -0.55576 | 0.787589 |

|            |          |          |          |
|------------|----------|----------|----------|
| DOHH       | 0.01724  | 1.878947 | 0.158939 |
| ADAT1      | 0.283087 | -0.18427 | 0.586424 |
| MKNK1      | 0.803829 | -0.13345 | 0.918848 |
| TMEM70     | 0.646626 | 0.271028 | 0.837353 |
| SPON2      | 0.060265 | 1.55128  | 0.287134 |
| MED18      | 0.074451 | 1.08898  | 0.317957 |
| ISCA1      | 0.862812 | 0.175889 | 0.951367 |
| TUBB6      | 1.28E-05 | 0.839569 | 0.001165 |
| CRB3       | 0.308969 | 0.694236 | 0.609864 |
| C9orf142   | 0.799534 | -0.0399  | 0.916173 |
| POLR3C     | 0.029219 | 0.713448 | 0.20681  |
| ABHD14A    | 0.361932 | 0.489187 | 0.645575 |
| HNRNPUL1   | 0.138653 | 0.211665 | 0.424105 |
| CHCHD7     | 0.067155 | -1.3393  | 0.302058 |
| MSTO1      | 0.500784 | 0.62465  | 0.746432 |
| PHF23      | 0.806572 | 0.124657 | 0.920528 |
| PDCD10     | 0.32085  | 0.072235 | 0.613139 |
| RPP25      | 0.976495 | 0.034628 | 0.998921 |
| G6PC3      | 0.24062  | 1.031463 | 0.543858 |
| DERL1      | 0.314461 | 0.398213 | 0.612305 |
| EFHD1      | 0.00584  | 1.968819 | 0.089662 |
| HTATIP2    | 0.167008 | -0.28021 | 0.457139 |
| DDX23      | 0.211314 | 0.167185 | 0.506632 |
| WRAP53     | 0.000805 | 2.169951 | 0.026988 |
| APOO       | 0.981581 | -0.0045  | 1        |
| BDH2       | 0.850885 | -0.11686 | 0.944945 |
| FAM195A    | 0.749046 | 0.141331 | 0.890902 |
| C20orf24   | 0.84819  | 0.139972 | 0.944084 |
| C9orf16    | 0.792343 | 0.194475 | 0.913596 |
| TRAF4      | 0.740246 | 0.187168 | 0.886428 |
| ALG12      | 0.632383 | 0.26346  | 0.830965 |
| C1orf50    | 0.480311 | 0.424537 | 0.732554 |
| MRI1       | 0.371444 | 0.127146 | 0.65423  |
| ABHD6      | 0.533738 | -0.0901  | 0.771094 |
| C15orf57   | 0.296204 | -0.6937  | 0.598943 |
| SLC25A23   | 0.920385 | 0.127565 | 0.980269 |
| MLPH       | 0.004012 | -1.18116 | 0.071889 |
| WDR18      | 0.228671 | 0.213003 | 0.528484 |
| VAMP8      | 0.44615  | -0.04614 | 0.706795 |
| THUMPD3    | 0.015062 | 0.977658 | 0.150049 |
| ADI1       | 0.955288 | -0.32955 | 0.993074 |
| RNF126     | 0.056538 | 1.289402 | 0.277829 |
| CEP250     | 0.42656  | 0.202915 | 0.693599 |
| MECR       | 0.14042  | -0.43811 | 0.426568 |
| EMC6       | 0.99464  | -0.09063 | 1        |
| NTMT1      | 0.986843 | -0.13216 | 1        |
| EDEM2      | 0.431347 | 0.118478 | 0.69627  |
| KATNB1     | 0.658802 | 0.475756 | 0.843836 |
| TUBB2B     | 0.000483 | 2.454307 | 0.020165 |
| FICD       | 0.991073 | 0.020957 | 1        |
| DSCC1      | 0.034185 | 1.024197 | 0.221721 |
| MLST8      | 0.835403 | -0.10491 | 0.935999 |
| C2orf49    | 0.553712 | 0.303271 | 0.783439 |
| TMEM109    | 0.130075 | -0.09689 | 0.410899 |
| PBDC1      | 0.175259 | 0.214599 | 0.466796 |
| KIFC3      | 0.064378 | 0.720693 | 0.296449 |
| PTDSS2     | 0.088198 | 1.160077 | 0.339301 |
| ST6GALNAC5 | 0.163707 | 0.67103  | 0.453012 |

|          |          |          |          |
|----------|----------|----------|----------|
| NOC4L    | 0.171095 | 0.600533 | 0.461822 |
| UTP14A   | 0.051672 | 0.610713 | 0.266309 |
| DUSP23   | 0.577274 | 0.206394 | 0.796634 |
| ALG8     | 0.208556 | 0.851191 | 0.503054 |
| TMED9    | 0.000515 | 0.369186 | 0.020674 |
| TMEM147  | 0.069533 | 1.185225 | 0.307494 |
| NUPL1    | 0.010194 | 0.395435 | 0.121876 |
| SELO     | 0.799524 | 0.298689 | 0.916173 |
| DPCD     | 0.758323 | 0.213023 | 0.896847 |
| GGACT    | 0.502215 | 0.391711 | 0.747559 |
| RUSC1    | 0.792499 | 0.111742 | 0.913596 |
| GNL3     | 0.004244 | 0.694285 | 0.074174 |
| SPATA5L1 | 0.036208 | 0.789741 | 0.227448 |
| RIOK2    | 0.685656 | 0.1979   | 0.857727 |
| TRMT61B  | 0.236003 | 0.130634 | 0.537858 |
| TMUB1    | 0.908073 | 0.373781 | 0.9734   |
| KIAA0586 | 0.134221 | -0.58403 | 0.417223 |
| TIMM21   | 0.022367 | 2.043925 | 0.179894 |
| TMEM106C | 0.300882 | 0.318601 | 0.602797 |
| SARG     | 0.013497 | -1.53572 | 0.141812 |
| KIFC1    | 0.006623 | 1.66265  | 0.097053 |
| NUP85    | 0.031269 | 0.309273 | 0.212999 |
| TPPP3    | 0.027821 | -0.72967 | 0.202072 |
| ELOVL1   | 0.644201 | -0.07196 | 0.837353 |
| DDA1     | 0.743478 | -0.23498 | 0.888303 |
| KATNAL1  | 0.923152 | 0.10417  | 0.980751 |
| CINP     | 0.211255 | 0.880261 | 0.506632 |
| HIRIP3   | 0.356692 | 0.546967 | 0.641472 |
| HIGD2A   | 0.167483 | 0.433691 | 0.457358 |
| IFT27    | 0.239029 | 0.55139  | 0.541047 |
| CCDC94   | 0.022171 | 1.682255 | 0.178703 |
| NUDT9    | 0.438315 | 0.169363 | 0.701933 |
| TARS2    | 0.257958 | 0.253158 | 0.560462 |
| ACAT2    | 0.434427 | 0.209202 | 0.698194 |
| REPIN1   | 0.120284 | -0.81864 | 0.39497  |
| RBM4     | 0.052873 | 0.360806 | 0.269122 |
| FUNDC2   | 0.357486 | -0.14125 | 0.641472 |
| RPAP1    | 0.007224 | 1.229829 | 0.101678 |
| SF3B5    | 0.023065 | 0.356113 | 0.182986 |
| C1orf43  | 0.135012 | 0.832653 | 0.417833 |
| SFXN3    | 0.004071 | 0.431245 | 0.072359 |
| PRR14    | 0.114594 | 1.191554 | 0.386544 |
| COLEC11  | 0.045488 | -0.54636 | 0.250872 |
| YIPF2    | 0.604483 | -0.29398 | 0.813002 |
| CHID1    | 0.637197 | -0.03628 | 0.833511 |
| PAPOLG   | 0.064261 | 0.731361 | 0.296208 |
| CARD10   | 0.839125 | 0.01985  | 0.939212 |
| SLC4A1AP | 0.944783 | -0.03743 | 0.988547 |
| CDK19    | 0.944069 | 0.008007 | 0.988547 |
| APOL6    | 0.254941 | -1.11846 | 0.557593 |
| GTPBP2   | 0.183025 | 0.828038 | 0.474175 |
| LSM14B   | 0.014224 | 1.843268 | 0.145268 |
| TAPBPL   | 0.637197 | -0.2189  | 0.833511 |
| SORBS1   | 0.454064 | 0.194031 | 0.712914 |
| JAM3     | 0.03553  | 1.317992 | 0.225178 |
| HINT2    | 0.407778 | -0.0915  | 0.680612 |
| CARD6    | 0.953004 | -0.06593 | 0.993074 |
| BTBD2    | 0.737798 | 0.211841 | 0.886077 |



|           |          |          |          |
|-----------|----------|----------|----------|
| TM2D2     | 0.05085  | 1.966449 | 0.264901 |
| TM2D1     | 0.563678 | -0.15712 | 0.789479 |
| STRA6     | 0.282912 | 0.717097 | 0.586171 |
| PLA2G12B  | 0.102462 | -0.46695 | 0.364372 |
| SGPP1     | 0.455535 | 0.410076 | 0.71417  |
| PLVAP     | 0.085745 | -0.69121 | 0.335537 |
| LGR4      | 0.568515 | 0.238479 | 0.791838 |
| OSBPL11   | 0.048205 | 0.645613 | 0.257798 |
| OSBPL10   | 0.001063 | 1.854631 | 0.031596 |
| BBS2      | 0.91143  | -0.03082 | 0.975706 |
| NPL       | 0.158067 | 0.721964 | 0.448712 |
| RAB11FIP5 | 0.001913 | 0.869016 | 0.046318 |
| TEKT3     | 0.007122 | -0.94823 | 0.101139 |
| BBC3      | 0.336166 | 0.563688 | 0.623617 |
| NT5C1A    | 0.301362 | -0.58486 | 0.603275 |
| TBC1D10A  | 0.138415 | 0.871929 | 0.424105 |
| C1QTNF6   | 0.124128 | 0.687473 | 0.400153 |
| C1QTNF5   | 0.00563  | 2.180844 | 0.088608 |
| C1QTNF7   | 0.02013  | -1.533   | 0.169778 |
| C1QTNF3   | 0.001636 | 2.892176 | 0.041715 |
| C1QTNF2   | 0.018767 | -1.09854 | 0.165951 |
| TMEM120A  | 0.257958 | -0.17157 | 0.560462 |
| NAA15     | 0.609213 | 0.041893 | 0.816529 |
| KLF16     | 0.147416 | 0.904924 | 0.436386 |
| BCL2L13   | 0.142204 | 0.326704 | 0.428816 |
| CARD14    | 0.487154 | -0.42705 | 0.737011 |
| CARD11    | 0.064135 | 0.921485 | 0.296208 |
| PRX       | 0.654188 | -0.65927 | 0.84199  |
| FSD1L     | 0.382877 | 0.491009 | 0.662478 |
| ASPN      | 0.071226 | 0.569329 | 0.311134 |
| CLEC7A    | 0.805837 | -0.0207  | 0.919879 |
| SLC12A9   | 0.272095 | 0.150513 | 0.575039 |
| SRRT      | 0.955289 | 0.05051  | 0.993074 |
| QTRT1     | 0.148574 | 0.481253 | 0.438051 |
| CFHR5     | 0.123287 | 0.831217 | 0.399387 |
| TMEM59    | 0.495705 | -0.52883 | 0.743024 |
| AP1M1     | 0.017726 | 0.246201 | 0.161012 |
| NUSAP1    | 0.913093 | 0.109457 | 0.975706 |
| SLC26A6   | 0.160289 | 0.682034 | 0.452818 |
| FTHL17    | 0.969086 | -0.07547 | 0.997592 |
| C14orf142 | 0.301923 | 0.324377 | 0.603275 |
| OSBPL1A   | 0.4576   | -0.05514 | 0.715224 |
| CECR5     | 0.939534 | -0.11261 | 0.986498 |
| FANCD2    | 0.877757 | -0.01458 | 0.959795 |
| EMILIN2   | 0.374984 | 0.131208 | 0.656862 |
| MAK16     | 0.407191 | -0.06566 | 0.680612 |
| SLC46A2   | 0.992139 | 0.012835 | 1        |
| PACSIN1   | 0.237385 | 1.225213 | 0.539736 |
| SCAPER    | 0.561277 | -0.38891 | 0.788589 |
| EMR3      | 0.614841 | 0.038749 | 0.820298 |
| ITPA      | 0.660922 | -0.02558 | 0.844596 |
| HDAC8     | 0.471304 | 0.565873 | 0.725803 |
| RTFDC1    | 0.19466  | 0.959585 | 0.488911 |
| CHMP4A    | 0.965801 | 0.006661 | 0.99616  |
| EIF2A     | 0.149515 | 0.393712 | 0.438811 |
| PECR      | 0.718727 | -0.60637 | 0.874478 |
| SEC11C    | 0.434427 | 0.185581 | 0.698194 |
| CADM1     | 0.347172 | 0.04462  | 0.632606 |

|                                     |          |          |          |
|-------------------------------------|----------|----------|----------|
| ANGPTL4                             | 0.023794 | 1.820091 | 0.186463 |
| POLDIP3                             | 0.699592 | 0.131336 | 0.864146 |
| KIAA1671                            | 0.855362 | 0.261936 | 0.946993 |
| SHANK3                              | 0.994311 | 0.038244 | 1        |
| GNB1L                               | 0.115843 | 1.089925 | 0.388045 |
| FUT8                                | 0.716764 | 0.253495 | 0.873394 |
| MRPL32                              | 0.433059 | 0.594351 | 0.698118 |
| MRPL20                              | 0.099299 | 0.588307 | 0.358854 |
| MRPL13                              | 0.274985 | 0.103314 | 0.577625 |
| MRPL9                               | 0.541765 | 0.086913 | 0.775521 |
| MRPL4                               | 0.327323 | 0.233071 | 0.617719 |
| CNFN                                | 0.322009 | 0.221223 | 0.613139 |
| MRPL1                               | 0.478274 | 0.037314 | 0.730754 |
| PCGF6                               | 0.087786 | 0.828031 | 0.339301 |
| CDHR2                               | 0.107007 | 0.547707 | 0.371691 |
| ACE2                                | 0.258196 | -0.38129 | 0.560621 |
| B3GNT5                              | 0.284348 | -0.64195 | 0.587721 |
| NIFK                                | 0.734024 | 0.137879 | 0.882858 |
| PARD6B                              | 0.016491 | -1.49347 | 0.155558 |
| FAM126A                             | 0.004586 | 1.390189 | 0.078257 |
| FGFBP2                              | 0.041397 | 0.583492 | 0.240826 |
| YTHDF1                              | 0.380774 | 0.471952 | 0.661698 |
| HELZ2                               | 0.507292 | 0.21209  | 0.75153  |
| RBCK1                               | 0.01019  | 1.055165 | 0.121876 |
| SRXN1                               | 0.428066 | -0.42201 | 0.695122 |
| MRPS26                              | 0.876815 | 0.207383 | 0.958859 |
| KRTAP2-2;KRTAP2-1;KRTAP2-4;KRTAP2-3 |          | 0        |          |
| NLN                                 | 0.44615  | 0.258409 | 0.706795 |
| AGXT2                               | 0.331588 | -0.11299 | 0.619341 |
| CEP41                               | 0.47017  | 0.522599 | 0.72456  |
| SETD2                               | 0.008812 | 1.308705 | 0.11325  |
| TBC1D2                              | 0.404052 | 0.198433 | 0.678271 |
| IFIH1                               | 0.102992 | 0.793907 | 0.365649 |
| PANK2                               | 0.885157 | 0.13982  | 0.964084 |
| DOCK9                               | 0.809743 | 0.030208 | 0.921586 |
| FRMD8                               | 0.061485 | 0.357024 | 0.289565 |
| PITPNM3                             | 0.079238 | -0.63577 | 0.32578  |
| PITPNM2                             | 0.278824 | 0.205826 | 0.581068 |
| WHSC1L1                             | 0.162378 | 0.77481  | 0.453012 |
| ABCA2                               | 0.689884 | -0.29549 | 0.859429 |
| SLC29A3                             | 0.001255 | 1.534509 | 0.03481  |
| NUF2                                | 0.002096 | 1.590422 | 0.048534 |
| MRPL37                              | 0.466082 | 0.097578 | 0.721065 |
| GTPBP4                              | 0.419078 | 0.143201 | 0.688796 |
| ASPSCR1                             | 0.255193 | 0.182966 | 0.557593 |
| OSBPL8                              | 0.003514 | 0.473633 | 0.067901 |
| OSBPL7                              | 0.471593 | 0.292483 | 0.726047 |
| OSBPL6                              | 0.318143 | 0.31393  | 0.613139 |
| UACA                                | 0.255193 | 0.353533 | 0.557593 |
| RAB34                               | 0.010997 | 0.735681 | 0.127049 |
| DPH1                                | 0.274747 | 0.585724 | 0.577625 |
| WDR11                               | 0.153276 | 0.372002 | 0.443165 |
| IRX2                                | 0.207366 | -0.64916 | 0.501941 |
| UPF3B                               | 0.803697 | -0.26579 | 0.918848 |
| CRNKL1                              | 0.486499 | 0.122023 | 0.73612  |
| NACAP1                              | 0.635921 | 0.240979 | 0.833511 |
| TBL1XR1                             | 0.211314 | 0.194893 | 0.506632 |
| UBL5                                | 0.609158 | -0.03791 | 0.816529 |

|          |          |          |          |
|----------|----------|----------|----------|
| PPP1R12C | 0.025563 | 0.465185 | 0.193268 |
| PRKD2    | 0.131757 | 0.280593 | 0.413476 |
| PLA2G12A | 0.687909 | -0.30136 | 0.859286 |
| ULBP3    | 0.107007 | 0.574714 | 0.371691 |
| ULBP2    | 0.304876 | 0.650971 | 0.606083 |
| EDEM3    | 0.001133 | 0.730157 | 0.032731 |
| FAM129A  | 0.474191 | 0.152355 | 0.727018 |
| TRIM8    | 0.192496 | 0.287256 | 0.486094 |
| UBXN6    | 0.035078 | 0.284328 | 0.223337 |
| SLC19A3  | 0.163438 | -0.20957 | 0.453012 |
| TM6SF1   | 0.271143 | 0.826016 | 0.574669 |
| TSGA10   | 0.146464 | 0.628341 | 0.435621 |
| UCK2     | 0.039094 | 1.551641 | 0.236232 |
| SIGLEC1  | 0.359171 | 0.236043 | 0.643861 |
| API5     | 0.09581  | 0.306817 | 0.352331 |
| NLRP1    | 0.193248 | 0.512545 | 0.487116 |
| NMES1    | 0.105374 | 0.63504  | 0.369374 |
| SPRY4    | 0.415253 | -0.47764 | 0.686028 |
| DPY30    | 0.036237 | 0.828319 | 0.227448 |
| PKIB     | 0.122745 | 0.945856 | 0.398993 |
| TRIM9    | 0.410792 | 0.441557 | 0.683152 |
| TRIM5    | 0.001363 | 1.412371 | 0.036688 |
| TRIM4    | 0.54177  | 0.218366 | 0.775521 |
| TRIM2    | 0.277869 | -0.24186 | 0.579677 |
| KRT23    | 0.982241 | -0.05141 | 1        |
| INO80B   | 0.018626 | 0.941114 | 0.165633 |
| LRRCC1   | 0.702525 | -0.11372 | 0.866226 |
| SETD5    | 0.302149 | 0.339746 | 0.60359  |
| UNK      | 0.183743 | 0.24701  | 0.474829 |
| FTO      | 0.036237 | 0.686559 | 0.227448 |
| ZDHHC5   | 0.15535  | 0.811886 | 0.445058 |
| TANGO6   | 0.000747 | 1.368988 | 0.025761 |
| TNKS1BP1 | 0.181644 | 0.293406 | 0.472575 |
| SEMA4C   | 0.035203 | 1.020496 | 0.224002 |
| AMBRA1   | 0.05757  | 0.771134 | 0.280499 |
| UBE2O    | 0.289748 | 0.252107 | 0.593134 |
| ZYG11B   | 0.72401  | 0.159452 | 0.876654 |
| TANC1    | 0.260718 | -0.43891 | 0.56373  |
| EPT1     | 0.960293 | -0.50738 | 0.994122 |
| XPO4     | 0.050493 | 0.697514 | 0.263221 |
| LNP      | 0.011636 | 0.368139 | 0.129699 |
| CEP44    | 0.034878 | 0.964094 | 0.223337 |
| TTYH3    | 0.078472 | 0.844457 | 0.32578  |
| KLHL4    | 0.731297 | 0.140968 | 0.881419 |
| SRCIN1   | 0.837634 | 0.183051 | 0.938119 |
| MTMR12   | 0.078771 | -0.37537 | 0.32578  |
| WDR33    | 0.394781 | 0.228638 | 0.672349 |
| BHLHE41  | 0.186982 | -0.28511 | 0.479162 |
| BCL11B   | 0.089073 | 0.720175 | 0.341477 |
| SLC39A8  | 0.075938 | -1.53356 | 0.321214 |
| HLA-DRB1 | 0.997267 | -0.14899 | 1        |
| WDR12    | 0.021148 | 0.508075 | 0.173882 |
| YIPF3    | 0.876815 | -0.13166 | 0.958859 |
| TINAGL1  | 0.305036 | -0.35232 | 0.606083 |
| NDEL1    | 0.47933  | -0.45544 | 0.731833 |
| ACTR6    | 0.025724 | 1.368332 | 0.193808 |
| PRSS22   | 0.099208 | 0.78935  | 0.358779 |
| ROGDI    | 0.486111 | -0.2549  | 0.73612  |

|                    |          |          |          |
|--------------------|----------|----------|----------|
| C20orf27           | 0.081589 | 0.571494 | 0.329897 |
| PDGFD              | 0.010576 | 1.099389 | 0.124802 |
| PITHD1             | 0.997369 | 0.093904 | 1        |
| IMUP               | 0.466777 | -0.80864 | 0.721939 |
| DERL2              | 0.014531 | 0.983748 | 0.147184 |
| COMMD5             | 0.882017 | -0.25124 | 0.961515 |
| MAP1LC3B;MAP1LC3B2 | 0.008068 | 1.46022  | 0.107782 |
| REXO4              | 0.124148 | 1.06295  | 0.400153 |
| DDX24              | 0.407778 | 0.111754 | 0.680612 |
| DNAI2              | 0.976419 | 0.03344  | 0.998921 |
| POLR1E             | 0.200079 | 0.692259 | 0.493237 |
| WDR61              | 0.044589 | 0.185648 | 0.24851  |
| SLIRP              | 0.157109 | -0.27047 | 0.447022 |
| SRR                | 0.155958 | 0.753263 | 0.44616  |
| CCDC90B            | 0.274985 | 0.112193 | 0.577625 |
| NIF3L1             | 0.929044 | 0.070047 | 0.983115 |
| EGLN1              | 0.077639 | 0.528705 | 0.324641 |
| MCOLN1             | 0.092536 | 1.073216 | 0.347013 |
| TMEM39B            | 0.954108 | 0.047644 | 0.993074 |
| CTDSP1             | 0.693827 | -0.24885 | 0.861478 |
| FAM192A            | 0.10745  | 0.853441 | 0.372977 |
| EIF5A2             | 0.000175 | 2.476585 | 0.009596 |
| WWTR1              | 0.001001 | 1.897558 | 0.030576 |
| FGF23              | 0.322009 | 0.088518 | 0.613139 |
| CHST6              | 0.023287 | 1.28756  | 0.18431  |
| TWSG1              | 0.415505 | 0.621247 | 0.686235 |
| COA1               | 0.851978 | 0.427415 | 0.945779 |
| LAT2               | 0.03862  | 1.15652  | 0.235412 |
| MFF                | 0.67051  | 0.154682 | 0.850681 |
| NAA50              | 0.850885 | -0.00687 | 0.944945 |
| LACRT              | 0.322009 | 0.163854 | 0.613139 |
| UBA5               | 0.206534 | 0.187475 | 0.500256 |
| MKRN2              | 0.079897 | 0.489572 | 0.325919 |
| LHPP               | 0.939534 | 0.074485 | 0.986498 |
| MTFR1L             | 0.515875 | 0.146932 | 0.757825 |
| TMEM126A           | 0.861239 | -0.01195 | 0.950165 |
| MAF1               | 0.601819 | 0.29007  | 0.81176  |
| PAIP1              | 0.093209 | 0.288059 | 0.347256 |
| CLPB               | 0.749036 | -0.08261 | 0.890902 |
| MIS12              | 0.021227 | 1.66154  | 0.174388 |
| RAB33B             | 0.709344 | 0.164959 | 0.869179 |
| LSG1               | 0.106075 | 0.650101 | 0.370631 |
| NUAK2              | 0.389717 | -0.29643 | 0.668163 |
| FAM107B            | 0.950035 | 0.305223 | 0.990863 |
| NAT10              | 0.081043 | 0.227691 | 0.328405 |
| COMMD4             | 0.123514 | 0.396496 | 0.399387 |
| SPATC1L            | 0.845762 | -0.10297 | 0.942239 |
| KLC2               | 0.05165  | 0.919636 | 0.266309 |
| CRISPLD2           | 0.087621 | 1.072931 | 0.339301 |
| BTBD1              | 0.396223 | 0.438609 | 0.67382  |
| ILKAP              | 0.357478 | 0.239436 | 0.641472 |
| XRN2               | 0.037428 | 0.347252 | 0.231646 |
| TOLLIP             | 0.093209 | -0.28111 | 0.347256 |
| SAP130             | 0.059591 | 0.750828 | 0.285693 |
| BRD8               | 0.112677 | 0.650908 | 0.382523 |
| SHARPIN            | 0.486301 | 0.42473  | 0.73612  |
| ARL6               | 0.092844 | 1.252744 | 0.347256 |
| NSRP1              | 0.00491  | 1.826438 | 0.082133 |

|           |          |          |          |
|-----------|----------|----------|----------|
| INTS2     | 0.175254 | 0.351789 | 0.466796 |
| RACGAP1   | 0.046424 | 1.247666 | 0.253695 |
| ENKD1     | 0.632486 | -0.3261  | 0.830965 |
| PARP12    | 0.194929 | 0.180741 | 0.488911 |
| SIK2      | 0.186647 | 0.498293 | 0.479162 |
| PUS7L     | 0.095134 | 0.57087  | 0.35136  |
| CSTF2T    | 0.063339 | 0.472    | 0.294055 |
| WWP1      | 0.205263 | 0.420521 | 0.49957  |
| PCBD2     | 0.835401 | -0.34192 | 0.935999 |
| NT5C3A    | 0.882016 | 0.34592  | 0.961515 |
| FAM49A    | 0.840553 | -0.565   | 0.939212 |
| FXVD6     | 0.172617 | 0.490185 | 0.464157 |
| AP5M1     | 0.981514 | -0.07336 | 1        |
| TMEM222   | 0.343799 | -0.26152 | 0.630156 |
| HDHD2     | 0.892438 | 0.143664 | 0.966699 |
| GBP3      | 0.79579  | 0.157102 | 0.914433 |
| QRSL1     | 0.141963 | 0.649934 | 0.428816 |
| GABARAPL1 | 0.069462 | 1.154196 | 0.307321 |
| DDX47     | 0.236413 | 0.131172 | 0.537858 |
| RAB17     | 0.15276  | -0.87734 | 0.443165 |
| MAGT1     | 0.114161 | 0.283671 | 0.385201 |
| RAB1B     | 0.709387 | -0.03042 | 0.869179 |
| MRPL18    | 0.918566 | 0.181661 | 0.978657 |
| TSPYL1    | 0.343912 | -0.69887 | 0.630156 |
| TMEM168   | 0.274972 | 0.286335 | 0.577625 |
| LMAN2L    | 0.032856 | 0.398493 | 0.217297 |
| CCDC8     | 0.19032  | 0.660947 | 0.483515 |
| SMG9      | 0.001561 | 1.385065 | 0.040678 |
| C11orf54  | 0.03232  | -0.59459 | 0.215938 |
| ITFG3     | 0.083363 | 0.448531 | 0.332962 |
| OSBPL5    | 0.000756 | 1.360548 | 0.025904 |
| RBM38     | 0.619338 | 0.299083 | 0.82294  |
| NAPB      | 0.675487 | -0.2514  | 0.853186 |
| GZF1      | 0.1816   | 0.541829 | 0.472575 |
| DNTTIP1   | 0.574003 | 0.185487 | 0.795783 |
| ING2      | 0.506417 | 0.30775  | 0.751294 |
| BCL11A    | 0.393617 | 0.253337 | 0.671013 |
| ZBP1      | 0.38106  | 0.565887 | 0.661698 |
| SIL1      | 0.78936  | -0.09609 | 0.911483 |
| SDCBP2    | 0.594052 | 0.312495 | 0.806337 |
| METTL9    | 0.136741 | 1.089896 | 0.421544 |
| ANAPC1    | 0.011099 | 0.908745 | 0.128038 |
| XYLT2     | 0.031321 | 1.011194 | 0.212999 |
| IRF2BPL   | 0.415291 | 0.275971 | 0.686028 |
| GLT8D2    | 1.61E-08 | 4.37618  | 6.25E-06 |
| UNC93B1   | 0.754005 | -0.05836 | 0.894351 |
| CYSTM1    | 0.757749 | -0.78763 | 0.896847 |
| POLR3F    | 0.061465 | 0.82903  | 0.289565 |
| NUCKS1    | 0.492705 | 0.649937 | 0.740961 |
| TMX4      | 0.986843 | 0.040162 | 1        |
| KIF13A    | 0.238311 | 0.404498 | 0.540624 |
| ASCC2     | 0.028771 | 0.699029 | 0.204946 |
| WNT5B     | 0.304818 | 0.487253 | 0.606083 |
| RBSN      | 0.017992 | 0.802358 | 0.162636 |
| ISCU      | 0.198358 | -0.28759 | 0.49217  |
| SLC25A18  | 0.17188  | 0.384361 | 0.463149 |
| MESDC1    | 0.161733 | 0.277056 | 0.453012 |
| SLC35B3   | 0.933816 | 0.04749  | 0.984157 |

|          |          |          |          |
|----------|----------|----------|----------|
| OSBPL2   | 0.609193 | 0.543293 | 0.816529 |
| MEGF9    | 0.442398 | -0.43515 | 0.703763 |
| SLC25A51 | 0.102183 | 1.045828 | 0.364372 |
| RSPH9    | 0.645144 | -0.21688 | 0.837353 |
| DNAJC25  | 0.336446 | 0.398183 | 0.624    |
| ATG5     | 0.206534 | 0.2398   | 0.500256 |
| WDR13    | 0.314461 | -0.13691 | 0.612305 |
| TSPAN10  | 0.779828 | 0.072616 | 0.907277 |
| EPN3     | 0.219743 | 0.429154 | 0.517665 |
| MED28    | 0.812333 | -0.49818 | 0.923871 |
| EHD4     | 0.97106  | -0.03469 | 0.997592 |
| MMP28    | 0.449805 | 0.523547 | 0.709598 |
| P2RY12   | 0.948081 | 0.112405 | 0.990595 |
| C1orf21  | 0.744057 | 0.173506 | 0.888303 |
| CARD9    | 0.019248 | 1.647624 | 0.167058 |
| VPS33B   | 0.043893 | 0.280702 | 0.247494 |
| VPS16    | 0.004244 | 0.3267   | 0.074174 |
| VPS11    | 0.050495 | 0.230315 | 0.263221 |
| SH3BGRL3 | 0.277896 | 0.310743 | 0.579677 |
| ALDH8A1  | 0.994878 | -0.03094 | 1        |
| CXCL16   | 0.361038 | -0.62577 | 0.644411 |
| GAN      | 0.001663 | 1.770774 | 0.042203 |
| ARV1     | 0.4798   | -0.54686 | 0.732278 |
| SLC25A32 | 0.173267 | 0.647823 | 0.464598 |
| TRIOBP   | 0.675324 | 0.084956 | 0.853175 |
| SEMA6A   | 0.555312 | 0.067301 | 0.783439 |
| HSD3B7   | 0.029729 | 1.479613 | 0.208169 |
| EPC1     | 0.2923   | 0.485112 | 0.595788 |
| CCDC68   | 0.440215 | -0.20443 | 0.70314  |
| SLK      | 0.149515 | -0.1716  | 0.438811 |
| BLZF1    | 0.068987 | 0.771631 | 0.306571 |
| PPIL3    | 0.105374 | 0.21548  | 0.369374 |
| C10orf11 | 0.710654 | -0.44684 | 0.870136 |
| PDCL3    | 0.089413 | 0.641913 | 0.341477 |
| MTIF3    | 0.44953  | 0.312214 | 0.709598 |
| TAOK3    | 0.81486  | -0.01251 | 0.924847 |
| RASSF4   | 0.930329 | 0.1283   | 0.984006 |
| BHMT2    | 0.319672 | 0.1668   | 0.613139 |
| RAB3GAP2 | 0.007333 | 0.417758 | 0.102825 |
| ADNP     | 0.197211 | 0.42216  | 0.490309 |
| DPH5     | 0.555984 | 0.193859 | 0.783439 |
| KCNN2    | 0.089503 | 0.363107 | 0.341477 |
| RANBP17  | 0.053904 | -0.51463 | 0.271999 |
| DHX36    | 0.005656 | 0.478645 | 0.088608 |
| PPA2     | 0.103963 | -0.2338  | 0.366863 |
| SPNS1    | 0.113397 | 0.137643 | 0.384261 |
| MS4A6A   | 0.655968 | 0.367792 | 0.84209  |
| MRPL46   | 0.490639 | 0.090614 | 0.738656 |
| CHRD     | 0.938446 | -0.15896 | 0.986498 |
| CLEC4M   |          | 0        |          |
| IFI27L2  | 0.248603 | 1.44733  | 0.552225 |
| ZNF106   | 0.623189 | -0.05991 | 0.825978 |
| PARL     | 0.264348 | 0.66423  | 0.566943 |
| PNN      | 0.063339 | 0.414839 | 0.294055 |
| EPB41L4B | 0.818809 | -0.25877 | 0.92687  |
| TMEM245  | 0.604582 | 0.054579 | 0.813002 |
| FOXP1    | 5.59E-05 | 2.517493 | 0.003976 |
| GGNBP2   | 0.359903 | 0.157735 | 0.644411 |

|            |          |          |          |
|------------|----------|----------|----------|
| TP63       | 0.993518 | 0.040787 | 1        |
| SNX25      | 0.532956 | -0.49207 | 0.7709   |
| KCTD10     | 0.046529 | 1.064667 | 0.253921 |
| CPVL       | 0.81486  | 0.051913 | 0.924847 |
| TRIT1      | 0.232663 | 0.710111 | 0.53459  |
| C11orf68   | 0.101186 | 0.629867 | 0.361901 |
| DPAGT1     | 0.798119 | -0.5245  | 0.916038 |
| C12orf65   | 0.43065  | 0.181558 | 0.695651 |
| GHITM      | 0.606871 | 0.247708 | 0.815541 |
| BOLA2      | 0.804634 | -0.22798 | 0.918848 |
| MMADHC     | 0.053356 | 1.408835 | 0.270832 |
| TXNIP      | 0.257225 | 0.715559 | 0.560462 |
| TMX1       | 0.175259 | 0.21749  | 0.466796 |
| NELFA      | 0.939533 | 0.176451 | 0.986498 |
| ACBD3      | 0.011206 | 0.328325 | 0.128397 |
| CDC42EP4   | 0.588787 | -0.67884 | 0.80405  |
| MUC13      | 0.767316 | -0.22174 | 0.901915 |
| CENPH      | 0.312224 | 0.596402 | 0.610732 |
| SEMA4A     | 0.913998 | 0.074147 | 0.97604  |
| TPK1       | 0.633942 | 0.250958 | 0.832269 |
| PIGM       | 0.410867 | -0.55438 | 0.683152 |
| PTPN23     | 0.068179 | 0.151182 | 0.303928 |
| UNC45A     | 0.694713 | -0.07856 | 0.861478 |
| MFSD1      | 0.019768 | 1.479556 | 0.1684   |
| SMOC2      | 1.04E-05 | 2.928652 | 0.000991 |
| PPDPF      | 0.746826 | 0.079814 | 0.889884 |
| DNAJC5     | 0.604602 | -0.16767 | 0.813002 |
| LIME1      | 0.476921 | 0.493108 | 0.729993 |
| DSN1       | 0.009583 | 1.043478 | 0.118893 |
| C1orf198   | 0.090616 | 0.293203 | 0.343901 |
| CHMP4B     | 0.511623 | 0.105647 | 0.754376 |
| RWDD1      | 0.338634 | 0.645694 | 0.62586  |
| FZD8       | 0.77733  | -0.16797 | 0.906372 |
| CUEDC2     | 0.440215 | -0.19851 | 0.70314  |
| FBXL15     | 0.518646 | -0.39835 | 0.760272 |
| RBKS       | 0.835743 | 0.341005 | 0.936286 |
| FN3K       | 0.148584 | -0.29822 | 0.438051 |
| POFUT1     | 0.001332 | 0.496983 | 0.036119 |
| PIGU       | 0.010589 | 0.424644 | 0.124802 |
| MAP1LC3A   | 0.039169 | 1.395114 | 0.236232 |
| TOR3A      | 0.043824 | 0.51263  | 0.247494 |
| WNK1       | 0.840557 | -0.03893 | 0.939212 |
| RNPEP      | 0.343873 | -0.1735  | 0.630156 |
| GOLPH3L    | 0.150437 | 0.573913 | 0.440469 |
| GOLPH3     | 0.404052 | 0.170519 | 0.678271 |
| OSGEPL1    | 0.849688 | -0.15925 | 0.944945 |
| SAV1       | 0.099814 | 0.893227 | 0.359216 |
| TUBB1      | 0.611978 | 0.323386 | 0.81882  |
| RHOJ       | 0.716148 | 0.20648  | 0.873229 |
| DEF6       | 0.604602 | 0.100795 | 0.813002 |
| ST6GALNAC4 | 0.308182 | -0.5843  | 0.609277 |
| SMOC1      | 0.121191 | 0.71912  | 0.39685  |
| EPB41L1    | 0.047465 | -0.36053 | 0.255923 |
| GLIPR2     | 0.301936 | 0.092318 | 0.603275 |
| FAM83D     | 0.256399 | 0.370887 | 0.560009 |
| ZHX3       | 0.064416 | -0.93551 | 0.296449 |
| TRABD      | 0.70448  | -0.19931 | 0.867291 |
| SMDT1      | 0.900141 | 0.605259 | 0.971583 |

|          |          |          |          |
|----------|----------|----------|----------|
| RIBC2    | 0.175422 | -0.54711 | 0.466796 |
| MTG2     | 0.70382  | 0.187147 | 0.867291 |
| SENP3    | 2.95E-05 | 2.503735 | 0.002271 |
| OSBPL3   | 0.11568  | 0.508937 | 0.387731 |
| SMARCAD1 | 0.044385 | 1.364367 | 0.24851  |
| FBXO44   | 0.450001 | 0.446473 | 0.709598 |
| PLEKHA4  | 0.140706 | 0.714723 | 0.427319 |
| EHD1     | 0.934288 | -0.08635 | 0.984157 |
| RNF41    | 0.090633 | 0.9838   | 0.343901 |
| RGCC     | 0.594272 | -0.08437 | 0.806337 |
| PCIF1    | 0.09193  | 0.405759 | 0.345626 |
| ESF1     | 0.011106 | 1.525474 | 0.128038 |
| ALG2     | 0.507389 | 0.068155 | 0.75153  |
| ACTL8    | 0.992139 | 0.024041 | 1        |
| ZNF644   | 0.237941 | 0.385405 | 0.540557 |
| HEATR1   | 0.347246 | 0.205158 | 0.632606 |
| ZNF768   | 0.001448 | 1.38648  | 0.038801 |
| POMK     | 0.077145 | 1.178347 | 0.324464 |
| RABEP2   | 0.689846 | 0.153642 | 0.859429 |
| TFB2M    | 0.1422   | 0.169974 | 0.428816 |
| CDCP1    | 0.086268 | 1.370971 | 0.336929 |
| CXorf56  | 0.523284 | -0.49301 | 0.764023 |
| FAM96A   | 0.223033 | 0.567992 | 0.521792 |
| SLITRK6  | 0.52523  | 0.294146 | 0.764479 |
| DHX35    | 0.047292 | 1.072057 | 0.255923 |
| RPP21    | 0.358581 | 0.413164 | 0.642907 |
| NSUN3    | 0.156489 | 0.509275 | 0.44698  |
| IGFLR1   | 0.070511 | 0.911715 | 0.31021  |
| OBFC1    | 0.205838 | -0.55716 | 0.500256 |
| BICC1    | 0.042338 | 1.213601 | 0.243142 |
| DENND2D  | 0.923728 | 0.289761 | 0.980751 |
| PCNXL3   | 0.022698 | 0.764747 | 0.180981 |
| CLMP     | 0.218898 | 0.425441 | 0.516332 |
| EPHX3    | 0.520927 | -0.34867 | 0.761212 |
| HAUS4    | 0.024014 | 1.359511 | 0.187298 |
| CCDC134  | 0.28668  | -0.17141 | 0.590053 |
| TUT1     | 0.62435  | 0.278292 | 0.827221 |
| TMEM38A  | 0.651513 | 0.049721 | 0.839222 |
| CCDC86   | 0.015451 | 1.470291 | 0.152523 |
| REEP4    | 0.470893 | 0.133171 | 0.725372 |
| C6orf106 | 0.139822 | 0.431752 | 0.426504 |
| OPA3     | 0.923803 | 0.256853 | 0.980751 |
| PRR36    | 0.305919 | 0.152299 | 0.607619 |
| TMEM231  | 0.908077 | 0.065708 | 0.9734   |
| ARMC7    | 0.389868 | 0.398718 | 0.668319 |
| MYH16    | 0.684849 | 0.212048 | 0.85709  |
| TASP1    | 0.15389  | 0.947895 | 0.444477 |
| NARFL    | 0.96843  | 0.237536 | 0.997592 |
| DHX33    | 0.449127 | 0.422149 | 0.709482 |
| ACSS3    | 0.327317 | 0.312848 | 0.617719 |
| NOL6     | 0.157109 | 0.294481 | 0.447022 |
| ZDHHHC6  | 0.003786 | 2.297063 | 0.07058  |
| C2orf44  | 0.534225 | 0.128866 | 0.771496 |
| YTHDC2   | 0.000433 | 0.988578 | 0.018693 |
| AZI2     | 0.814632 | 0.060526 | 0.924847 |
| EPS8L2   | 0.426712 | -0.18306 | 0.693599 |
| ESRP2    | 0.214093 | -0.21811 | 0.50977  |
| RPAP3    | 0.155183 | 0.344694 | 0.444958 |



|          |          |          |          |
|----------|----------|----------|----------|
| BCAS3    | 0.008345 | 1.117447 | 0.110054 |
| ALG9     | 0.794443 | 0.026156 | 0.913708 |
| C2orf43  | 0.269152 | 1.020051 | 0.571371 |
| NO66     | 0.05451  | 0.4789   | 0.273313 |
| ANTXR1   | 1.71E-07 | 1.850708 | 3.80E-05 |
| TMEM134  | 0.046695 | -1.07709 | 0.254194 |
| WDR55    | 0.646641 | -0.23643 | 0.837353 |
| MAGIX    | 0.584665 | -0.40249 | 0.800854 |
| RNF167   | 0.58855  | -0.24908 | 0.803893 |
| RANBP3   | 0.024706 | 0.423155 | 0.190022 |
| GAREM    | 0.22359  | 0.380362 | 0.521792 |
| ZNF552   | 0.291769 | 0.227139 | 0.595183 |
| CWH43    | 0.09909  | 0.284047 | 0.358568 |
| C12orf49 | 0.794727 | 0.073111 | 0.913708 |
| GREM2    | 1        | -0.13589 | 1        |
| DCTPP1   | 0.382101 | 1.035599 | 0.661698 |
| SH2D4A   | 0.713141 | 0.099653 | 0.871276 |
| PEAK1    | 0.000464 | 1.274981 | 0.019585 |
| RPF2     | 0.581411 | -0.34688 | 0.797998 |
| SMYD3    | 0.182444 | 1.045528 | 0.473679 |
| SYNC     | 0.025084 | 1.14148  | 0.191949 |
| AAMDC    | 0.138259 | -0.7026  | 0.424067 |
| DOCK5    | 0.002686 | 1.291993 | 0.057778 |
| WDR26    | 0.145824 | 0.274048 | 0.434185 |
| TDRD3    | 0.35484  | 0.536106 | 0.638989 |
| C8orf33  | 0.958385 | -0.05523 | 0.994122 |
| ATP13A3  | 0.035077 | 0.656279 | 0.223337 |
| TMEM185B | 0.484075 | 0.263149 | 0.735071 |
| METTTL17 | 0.058889 | 1.313204 | 0.283482 |
| SUDS3    | 0.332292 | 0.257684 | 0.620028 |
| C10orf54 | 0.319239 | -0.60345 | 0.613139 |
| SCAF1    | 0.028958 | 1.059925 | 0.20582  |
| MVB12B   | 0.378165 | -0.56069 | 0.659304 |
| PLEKHG2  | 0.057155 | 0.834051 | 0.279008 |
| ZNF703   | 0.163438 | -0.08491 | 0.453012 |
| CCSER2   | 0.088468 | 0.335114 | 0.339985 |
| ZNF696   | 0.540968 | 0.163123 | 0.775521 |
| IFT22    | 0.320389 | 0.760336 | 0.613139 |
| CXorf36  | 0.303347 | -0.88007 | 0.605331 |
| NRDE2    | 0.118301 | 0.857308 | 0.392409 |
| KAT8     | 0.618774 | 0.31892  | 0.822486 |
| PTGES2   | 0.382127 | 0.246543 | 0.661698 |
| TMEM206  | 0.001245 | 1.767815 | 0.034693 |
| PHAX     | 0.150236 | 1.046662 | 0.440175 |
| UBE2Z    | 0.047096 | 0.464524 | 0.255677 |
| GEMIN7   | 0.793775 | -0.17503 | 0.913708 |
| ACAD9    | 0.343873 | 0.15485  | 0.630156 |
| NT5DC2   | 0.04253  | 0.689355 | 0.243142 |
| VCPKMT   | 0.163587 | 0.446488 | 0.453012 |
| YY1AP1   | 0.267449 | 0.44607  | 0.570195 |
| RMND5A   | 0.06238  | 1.212611 | 0.292127 |
| PRKRIP1  | 0.273551 | 0.644276 | 0.577625 |
| TTC12    | 0.40818  | -0.23825 | 0.680975 |
| ZMAT4    | 0.172617 | 0.444128 | 0.464157 |
| CAAP1    | 0.065702 | 0.989958 | 0.299507 |
| NOL11    | 0.404052 | 0.144874 | 0.678271 |
| DDX31    | 0.418612 | 0.439178 | 0.688796 |
| METTTL7A | 0.72417  | 0.000746 | 0.876654 |

|          |          |          |          |
|----------|----------|----------|----------|
| MANSC1   | 0.385408 | 0.541596 | 0.664306 |
| MMRN2    | 0.364426 | -0.36801 | 0.646996 |
| COQ10B   | 1        | -0.0501  | 1        |
| BRD9     | 0.410079 | 0.328719 | 0.682809 |
| CNNM2    | 0.026184 | 0.666341 | 0.194901 |
| FAM188A  | 0.306398 | -0.58819 | 0.607918 |
| ZNF395   | 0.178261 | 0.301234 | 0.469506 |
| SRD5A3   | 0.758577 | -0.28576 | 0.896847 |
| MOB1A    | 0.044589 | 0.47981  | 0.24851  |
| AKTIP    | 0.192398 | 0.406299 | 0.486094 |
| ZFAND3   | 0.66564  | -0.10055 | 0.847351 |
| ECT2     | 0.446152 | -0.41275 | 0.706795 |
| PLEKHF2  | 0.352344 | -0.22342 | 0.637424 |
| ANKZF1   | 0.43171  | 0.365513 | 0.696755 |
| GORASP2  | 0.520146 | 0.039036 | 0.760272 |
| ZWILCH   | 0.829882 | 0.042068 | 0.933615 |
| HN1L     | 0.49864  | 0.928715 | 0.744839 |
| RNF121   | 0.033229 | 0.745913 | 0.219502 |
| SP140L   | 0.261524 | 0.63075  | 0.564861 |
| SLC25A22 | 0.744041 | -0.00965 | 0.888303 |
| PSTPIP2  | 0.591686 | -0.50626 | 0.805893 |
| MED20    | 0.015747 | 0.853246 | 0.15374  |
| WDR76    | 0.167504 | 0.567531 | 0.457358 |
| C14orf93 | 0.18654  | -0.90746 | 0.479026 |
| QTRTD1   | 0.036232 | 0.490202 | 0.227448 |
| WDR54    | 0.852863 | 0.203846 | 0.946466 |
| ACTR8    | 0.398372 | 0.292965 | 0.675933 |
| ARMT1    | 0.317645 | 0.184169 | 0.613139 |
| CNOT10   | 0.003027 | 0.830357 | 0.062294 |
| LRRC40   | 0.021897 | 0.425029 | 0.176756 |
| RMI1     | 0.310077 | 0.335507 | 0.609864 |
| EHMT1    | 0.104394 | 0.889124 | 0.368033 |
| SFXN1    | 0.600007 | 0.121859 | 0.810262 |
| VIPAS39  | 0.244338 | 0.300204 | 0.547425 |
| COG4     | 0.074384 | 0.350109 | 0.317894 |
| ACTR5    | 0.047734 | 1.179295 | 0.256846 |
| AGO3     | 0.040551 | 0.376133 | 0.240216 |
| VPS37B   | 0.013012 | 0.45349  | 0.139171 |
| MRPL44   | 0.400346 | 0.149771 | 0.67622  |
| ISG20L2  | 0.112796 | 1.006623 | 0.38281  |
| KANSL2   | 0.029097 | 1.297514 | 0.206601 |
| UNKL     | 0.084824 | 1.105777 | 0.335537 |
| L2HGDH   | 0.680152 | 0.248565 | 0.85545  |
| COPS7B   | 0.675324 | 0.062635 | 0.853175 |
| NHEJ1    | 0.82473  | 0.112264 | 0.930395 |
| SEC61A2  | 0.178261 | 0.313899 | 0.469506 |
| CAB39L   | 0.546872 | -0.37208 | 0.779208 |
| FKRP     | 0.058064 | 0.976731 | 0.281    |
| ELP3     | 0.001789 | 0.43855  | 0.044281 |
| JMJD4    | 0.993518 | -0.0077  | 1        |
| RPF1     | 0.876747 | -0.11005 | 0.958859 |
| GPN2     | 0.319799 | 0.384637 | 0.613139 |
| POLR1B   | 0.085728 | 0.372801 | 0.335537 |
| LIN28A   | 0.389093 | -0.49819 | 0.667643 |
| UCK1     | 0.783548 | 0.094974 | 0.909506 |
| FN3KRP   | 0.809743 | 0.038796 | 0.921586 |
| TBC1D17  | 0.181644 | 0.266795 | 0.472575 |
| CALHM2   | 0.202437 | 0.681353 | 0.496184 |

|          |          |          |          |
|----------|----------|----------|----------|
| CARS2    | 0.500974 | 0.394261 | 0.746514 |
| CERS4    | 0.260755 | -0.78763 | 0.56373  |
| EFCC1    | 0.479442 | 0.822437 | 0.731833 |
| RSAD1    | 0.09909  | 0.339884 | 0.358568 |
| SLC52A2  | 0.903871 | 0.209879 | 0.972246 |
| PPCS     | 0.490639 | -0.11019 | 0.738656 |
| SUGCT    | 0.049226 | 0.987707 | 0.260606 |
| UBTD1    | 0.073254 | 1.468572 | 0.31592  |
| WDR41    | 0.003933 | 1.686268 | 0.071362 |
| MEAF6    | 0.150906 | 0.485124 | 0.44125  |
| FBR5     | 0.416936 | 0.315471 | 0.687847 |
| SAP30L   | 0.693244 | 0.478991 | 0.861478 |
| NMNAT1   | 0.590862 | 0.21195  | 0.804875 |
| MLXIP    | 0.023789 | 1.032266 | 0.186463 |
| LIN7B    | 0.01083  | 1.152029 | 0.126436 |
| LPHN3    | 0.447034 | -0.3017  | 0.707261 |
| C17orf75 | 0.751429 | 0.182206 | 0.893066 |
| SIAE     | 0.809743 | 0.00627  | 0.921586 |
| PLEKHA5  | 0.524434 | -0.30587 | 0.764023 |
| SMURF2   | 0.122431 | 0.913723 | 0.398323 |
| UPF2     | 0.478274 | 0.219379 | 0.730754 |
| GNB4     | 0.572777 | 0.159507 | 0.794481 |
| XPO5     | 0.025131 | 0.60584  | 0.191949 |
| GRPEL1   | 0.422885 | -0.14396 | 0.691467 |
| UGT1A7   | 0.291769 | 0.260026 | 0.595183 |
| UGT1A10  | 0.126551 | 0.726508 | 0.403998 |
| CLK4     | 0.253685 | 0.261655 | 0.557407 |
| PRDM16   | 0.198855 | -0.43989 | 0.49217  |
| C12orf10 | 0.01507  | 0.806724 | 0.150049 |
| BCL2L12  | 0.59722  | 0.204427 | 0.808171 |
| PLEKHA2  | 0.108807 | 0.374354 | 0.375709 |
| PLEKHA3  | 0.375011 | 0.535557 | 0.656862 |
| PLEKHA1  | 0.432138 | 0.603544 | 0.697141 |
| SCPEP1   | 0.71923  | 0.074716 | 0.874478 |
| SP110    | 0.699576 | -0.20835 | 0.864146 |
| NTN4     | 0.139726 | -1.01051 | 0.426504 |
| CACYBP   | 0.14042  | 0.196518 | 0.426568 |
| RRAGC    | 0.694713 | 0.067027 | 0.861478 |
| TRPV4    | 0.005841 | 1.206852 | 0.089662 |
| PATZ1    | 0.041395 | 0.78141  | 0.240826 |
| ZFYVE1   | 0.031167 | 0.654501 | 0.212999 |
| ATP6V0A4 | 0.357062 | -0.70563 | 0.641472 |
| IFT122   | 0.087021 | 0.818636 | 0.337936 |
| LY9      | 0.867668 | -0.04116 | 0.954126 |
| RHOF     | 0.548329 | 0.576837 | 0.780282 |
| PDF      | 0.176313 | -0.55976 | 0.468258 |
| RDH14    | 0.498977 | -0.10272 | 0.744839 |
| MKNK2    | 0.722377 | -0.10257 | 0.876654 |
| PARVG    | 0.009999 | 0.709955 | 0.120967 |
| PARVB    | 0.656074 | -0.20693 | 0.84209  |
| CYP4F11  | 0.974738 | 0.108306 | 0.998921 |
| AS3MT    | 0.920433 | -0.05297 | 0.980269 |
| TNS1     | 0.861239 | 0.139246 | 0.950165 |
| PLGRKT   | 0.311298 | 0.305686 | 0.609894 |
| NMRAL1   | 0.448077 | 0.324566 | 0.708126 |
| VEZT     | 0.063479 | 0.518415 | 0.294578 |
| SPC25    | 0.008061 | 1.508065 | 0.107782 |
| TAF9B    | 0.487804 | 0.262941 | 0.737793 |

|           |          |          |          |
|-----------|----------|----------|----------|
| SLC38A10  | 0.729121 | 0.091017 | 0.879656 |
| BARX1     |          | 0        |          |
| ETNK1     | 0.373317 | -0.6544  | 0.656487 |
| LPAR2     | 0.001994 | 1.079125 | 0.047089 |
| ELTD1     | 0.595609 | 0.250615 | 0.806482 |
| TMEM165   | 0.257958 | 0.346297 | 0.560462 |
| APOBEC3G  | 0.653758 | 0.404474 | 0.841555 |
| SLC25A19  | 0.006911 | 0.933671 | 0.099675 |
| TMBIM4    | 0.319672 | -0.24402 | 0.613139 |
| EML4      | 0.81486  | 0.084393 | 0.924847 |
| RNMTL1    | 0.252079 | 0.611854 | 0.555643 |
| GLOD4     | 0.236413 | -0.09757 | 0.537858 |
| CBX8      | 0.816942 | 0.382835 | 0.926736 |
| SENP2     | 0.428197 | 0.28516  | 0.695233 |
| ZBTB20    | 0.572756 | 0.223791 | 0.794481 |
| MUC5B     | 0.636834 | -0.57171 | 0.833511 |
| NEK6      | 0.118895 | 0.749603 | 0.392576 |
| SPON1     | 0.021885 | 1.0443   | 0.176756 |
| MCCC2     | 0.228671 | -0.14743 | 0.528484 |
| ZFYVE28   | 0.481288 | 0.066539 | 0.733586 |
| NCOA5     | 0.537409 | 0.11119  | 0.773175 |
| TANC2     | 0.00226  | 1.399089 | 0.051155 |
| EPG5      | 0.857224 | 0.141773 | 0.948093 |
| MOV10     | 0.006642 | 0.649761 | 0.097053 |
| ZNF532    | 0.176351 | 0.665039 | 0.468258 |
| METTL14   | 0.455535 | 0.373007 | 0.71417  |
| ARHGEF10L | 0.103953 | 0.430814 | 0.366863 |
| SMURF1    | 0.870327 | -0.16803 | 0.956098 |
| ANO8      | 0.63741  | 0.434233 | 0.833511 |
| GBA2      | 0.745637 | 0.157658 | 0.889041 |
| CWC22     | 0.008089 | 0.679906 | 0.107782 |
| NCKAP5L   | 0.874055 | -0.08186 | 0.957716 |
| SYTL2     | 0.247715 | 1.019503 | 0.550914 |
| TNRC6C    | 0.061865 | 0.742165 | 0.290811 |
| ANKH      | 0.010941 | 1.474125 | 0.127049 |
| RAVER2    | 0.1061   | 0.746571 | 0.370631 |
| VAT1L     | 0.299766 | 0.335042 | 0.602797 |
| ROBO2     | 0.665748 | -0.22461 | 0.847351 |
| CHD8      | 0.182435 | 0.835099 | 0.473679 |
| PCDH18    | 0.15526  | 0.105739 | 0.444958 |
| GPAM      | 0.708911 | 0.285223 | 0.869179 |
| ZFP14     | 0.104629 | -1.06378 | 0.368512 |
| PLXNA4    | 0.600731 | 0.220559 | 0.811041 |
| EPB41L5   | 0.011369 | -0.57921 | 0.128971 |
| TMEM8A    | 0.473532 | 0.361894 | 0.727018 |
| GPN1      | 0.197211 | 0.33959  | 0.490309 |
| GP6       | 0.960709 | 0.128988 | 0.994122 |
| SDF2L1    | 0.066208 | 0.279668 | 0.300455 |
| CSNK1G1   | 0.177789 | 0.751187 | 0.469455 |
| HHATL     | 0.438587 | -0.36279 | 0.701933 |
| CYP4F12   | 0.638802 | 0.190704 | 0.834211 |
| EPB41L4A  | 0.167464 | 0.413471 | 0.457358 |
| XAB2      | 0.422885 | 0.148898 | 0.691467 |
| CD248     | 0.041786 | 1.411365 | 0.242066 |
| CELSR2    | 0.616056 | -0.34773 | 0.821456 |
| PREB      | 0.161013 | 0.201146 | 0.453012 |
| POLD4     | 0.204523 | 0.708423 | 0.49865  |
| BRMS1     | 0.199824 | 0.621929 | 0.492817 |

|         |          |          |          |
|---------|----------|----------|----------|
| S100A14 | 0.651339 | -0.52828 | 0.839222 |
| SRA1    | 0.053969 | 1.165381 | 0.272201 |
| ATP13A1 | 0.131757 | 0.200676 | 0.413476 |
| MRS2    | 0.168533 | 0.935557 | 0.459489 |
| GOPC    | 0.057044 | 0.399017 | 0.278658 |
| MRPL47  | 0.396661 | 0.377659 | 0.67382  |
| LYRM4   | 0.830201 | -0.54081 | 0.933615 |
| SEPSECS | 0.689552 | -0.42456 | 0.859429 |
| CHMP1A  | 0.311298 | 0.115297 | 0.609894 |
| PTPRH   | 0.511124 | 0.20352  | 0.754376 |
| TM9SF3  | 0.101186 | 0.241142 | 0.361901 |
| RANGRF  | 0.35278  | 0.63166  | 0.637972 |
| XAGE1A  | 0.5791   | -0.34969 | 0.796675 |
| MYO10   | 0.862376 | -0.18985 | 0.95104  |
| RETN    | 0.872772 | 0.087019 | 0.956872 |
| JPH1    | 0.930329 | 0.088621 | 0.984006 |
| APMAP   | 0.71923  | 0.130107 | 0.874478 |
| WDR6    | 0.118762 | 0.587883 | 0.392409 |
| TXNRD2  | 0.11568  | -0.34239 | 0.387731 |
| TUFT1   | 0.300407 | 0.74515  | 0.602797 |
| CD209   | 0.704719 | 0.382406 | 0.867485 |
| SH2D2A  | 0.028968 | 0.779397 | 0.20582  |
| BPIFA1  | 0.07384  | 1.636212 | 0.316943 |
| ABCB6   | 0.7919   | 0.011967 | 0.913596 |
| SLC40A1 | 0.646844 | 0.354591 | 0.837416 |
| ARFGAP3 | 0.013753 | 0.579521 | 0.143228 |
| ZCCHC17 | 0.964981 | -0.57166 | 0.99616  |
| HMG20A  | 0.267798 | 0.27562  | 0.570195 |
| RAB18   | 0.434427 | 0.129894 | 0.698194 |
| ALG13   | 0.369669 | -0.60033 | 0.652969 |
| PALMD   | 0.252262 | 0.652882 | 0.555643 |
| SSU72   | 0.503169 | 0.601045 | 0.747596 |
| ABCB9   | 0.042259 | -1.0274  | 0.243142 |
| VTA1    | 0.153276 | 0.22008  | 0.443165 |
| PNPLA8  | 0.45805  | 0.264102 | 0.715224 |
| SARS2   | 0.572777 | 0.509998 | 0.794481 |
| POLM    | 0.920812 | -0.07311 | 0.98039  |
| RAB9B   | 0.541937 | -0.21567 | 0.775521 |
| MRPS30  | 0.09193  | 0.342376 | 0.345626 |
| DYNLRB1 | 0.72417  | -0.00428 | 0.876654 |
| MYOZ1   | 0.512878 | -0.32312 | 0.755723 |
| TREM1   | 0.664648 | 0.401908 | 0.847351 |
| EMC7    | 0.32085  | 0.187406 | 0.613139 |
| MMP25   | 0.942624 | -0.17762 | 0.988547 |
| MID1IP1 | 0.411887 | -0.29376 | 0.683152 |
| ENY2    | 0.1068   | 0.082445 | 0.371671 |
| SAYSD1  | 0.609519 | -0.3803  | 0.816842 |
| GPCPD1  | 0.077749 | 0.951804 | 0.324826 |
| A4GALT  | 0.229395 | 0.386006 | 0.529537 |
| EXOSC4  | 0.78936  | -0.16193 | 0.911483 |
| UBE2T   | 0.089389 | 1.172297 | 0.341477 |
| NGRN    | 0.491197 | -0.52045 | 0.739395 |
| NOP10   | 0.784284 | -0.13446 | 0.909506 |
| CD320   | 0.265497 | 0.640586 | 0.568807 |
| CHST11  | 0.107001 | 0.808995 | 0.371691 |
| OSGEP   | 0.537409 | -0.09085 | 0.773175 |
| DMAP1   | 0.197211 | 0.22539  | 0.490309 |
| ADAP2   | 0.372948 | 0.715879 | 0.656059 |

|         |          |          |          |
|---------|----------|----------|----------|
| FZD3    | 0.992139 | -0.05649 | 1        |
| UBN1    | 0.593889 | -0.27798 | 0.806337 |
| PCDH12  | 0.251916 | -0.52655 | 0.555643 |
| ZDHHHC4 | 0.848267 | 0.294603 | 0.944084 |
| ACP6    | 0.462044 | 0.724714 | 0.718747 |
| ISYNA1  | 0.164991 | 0.501471 | 0.454525 |
| IL1RAP  | 0.143272 | 0.717955 | 0.4311   |
| TMEM138 | 0.130119 | 0.616956 | 0.410919 |
| BRD7    | 0.023293 | 0.695676 | 0.18431  |
| DCP1A   | 0.006911 | 0.931991 | 0.099675 |
| KCNJ16  | 0.354428 | 0.538401 | 0.63835  |
| ACOT13  | 0.38573  | -0.20018 | 0.664306 |
| MED4    | 0.027819 | 0.506701 | 0.202072 |
| NXT2    | 0.717577 | 0.335347 | 0.874289 |
| TIMMDC1 | 0.148584 | 0.481193 | 0.438051 |
| NLRC4   | 0.498579 | 0.341391 | 0.744839 |
| RIC8A   | 0.062406 | 0.397395 | 0.292127 |
| SEMA4B  | 0.161211 | 0.952334 | 0.453012 |
| GPR108  | 0.216825 | -0.35019 | 0.513662 |
| CD93    | 0.902877 | -0.31543 | 0.971583 |
| ATP13A2 | 0.125788 | 0.87825  | 0.403148 |
| SLAMF7  | 0.121935 | 0.939717 | 0.397343 |
| LUC7L   | 0.774093 | 0.218753 | 0.903913 |
| ESM1    | 0.312494 | 0.439855 | 0.610732 |
| TMEM9B  | 0.197379 | 0.873769 | 0.490616 |
| NRIP3   | 0.69426  | 0.057882 | 0.861478 |
| SCUBE2  | 0.303209 | 0.559466 | 0.605162 |
| SLC52A3 | 0.988991 | 0.013844 | 1        |
| LZTFL1  | 0.0799   | 0.288455 | 0.325919 |
| MRPL40  | 0.871617 | -0.03825 | 0.956098 |
| PPAN    | 0.950027 | -0.04793 | 0.990863 |
| PLCB1   | 0.307327 | -0.57854 | 0.609175 |
| CASS4   | 0.285949 | 0.380927 | 0.590053 |
| CRTAC1  | 0.366062 | -0.11049 | 0.648976 |
| GPRC5C  | 0.242299 | -0.78688 | 0.54532  |
| TRIM36  | 0.352923 | 0.20371  | 0.638094 |
| TIGAR   | 0.086954 | 0.650665 | 0.337854 |
| C12orf4 | 0.042323 | 1.059334 | 0.243142 |
| COPRS   | 0.727328 | 0.214601 | 0.878927 |
| A1CF    | 0.69426  | 0.073032 | 0.861478 |
| WASH6P  | 0.144838 | 0.9818   | 0.43345  |
| TCF7L2  | 0.925516 | 0.031431 | 0.981917 |
| JADE2   | 0.144422 | 0.689114 | 0.432798 |
| RTN4    | 0.151386 | 0.207127 | 0.44125  |
| CYLD    | 0.000414 | 1.616812 | 0.018068 |
| IFT46   | 0.137959 | 0.869192 | 0.423499 |
| HINT3   | 0.343873 | -0.10363 | 0.630156 |
| MANBAL  | 0.512869 | 0.427941 | 0.755723 |
| RPRD1B  | 0.192667 | 0.269337 | 0.486094 |
| MIEF1   | 0.182925 | 0.811761 | 0.474175 |
| HPS4    | 0.593889 | -0.26405 | 0.806337 |
| XPNPEP3 | 0.133456 | 0.361899 | 0.416228 |
| PFDN4   | 0.572777 | 0.018078 | 0.794481 |
| SLC35C2 | 0.093078 | 0.685314 | 0.347256 |
| SETD8   | 0.992139 | -0.11742 | 1        |
| NIT2    | 0.009264 | 0.413879 | 0.116462 |
| AVEN    | 0.039924 | 1.206823 | 0.23845  |
| PVRL3   | 0.229479 | -0.68848 | 0.529537 |

|           |          |          |          |
|-----------|----------|----------|----------|
| INCENP    | 0.040913 | 1.031908 | 0.240826 |
| EXOSC5    | 0.744041 | -0.04204 | 0.888303 |
| EXOSC3    | 0.226131 | 0.138402 | 0.525131 |
| KIF13B    | 0.231232 | 0.213947 | 0.531962 |
| ANLN      | 0.061941 | 0.999988 | 0.290972 |
| XPNPEP1   | 0.185996 | 0.283845 | 0.478129 |
| GPHN      | 0.430555 | 0.218069 | 0.695651 |
| MYO5C     | 0.236413 | -0.3261  | 0.537858 |
| ZNF331    | 0.331588 | -0.08711 | 0.619341 |
| ITM2C     | 0.008282 | 1.766538 | 0.109484 |
| BIN3      | 0.0856   | -1.08612 | 0.335537 |
| UTP3      | 0.208708 | 0.174706 | 0.503054 |
| STARD7    | 0.200822 | -0.92775 | 0.494233 |
| C8orf4    | 0.77512  | -0.13835 | 0.904456 |
| BIRC6     | 0.314461 | 0.230523 | 0.612305 |
| PDLIM7    | 1.14E-08 | 1.095335 | 5.48E-06 |
| CD163L1   | 0.390897 | 0.431765 | 0.669566 |
| ACSS2     | 0.604598 | -0.2679  | 0.813002 |
| DIABLO    | 0.244338 | 0.16528  | 0.547425 |
| DDX21     | 0.130075 | 0.268885 | 0.410899 |
| SAR1A     | 0.114161 | 0.234619 | 0.385201 |
| POLE4     | 0.116372 | 1.285659 | 0.389223 |
| MAN1C1    | 0.424623 | 0.551105 | 0.693599 |
| NANS      | 0.784286 | -0.08293 | 0.909506 |
| SH3GLB2   | 0.950035 | 0.082824 | 0.990863 |
| EIF2B3    | 0.478274 | 0.167244 | 0.730754 |
| MBNL1     | 0.257958 | 0.249718 | 0.560462 |
| DLL4      | 0.322009 | 0.093579 | 0.613139 |
| PXMP2     | 0.901157 | -0.0214  | 0.971583 |
| ARHGEF3   | 0.030204 | 0.599075 | 0.209418 |
| TLR8      | 0.744142 | -0.22102 | 0.888309 |
| MXRA5     | 2.74E-09 | 2.477011 | 2.03E-06 |
| SPHK2     | 0.385408 | 0.415539 | 0.664306 |
| PDGFC     | 0.002389 | 1.855365 | 0.053103 |
| SLC17A5   | 0.95522  | 0.5225   | 0.993074 |
| EIF4ENIF1 | 0.030079 | 1.19344  | 0.209418 |
| CHST12    | 0.006608 | 1.675347 | 0.097053 |
| ST7       | 0.642916 | 0.143597 | 0.836333 |
| SIRT7     | 0.904222 | -0.36368 | 0.97253  |
| OTOR      | 0.322009 | 0.225747 | 0.613139 |
| FBXO6     | 0.352544 | 0.617366 | 0.637649 |
| PICK1     | 0.613484 | 0.209046 | 0.819264 |
| DUOX2     | 0.178261 | 0.269514 | 0.469506 |
| DUOX1     | 0.000846 | -1.99895 | 0.027765 |
| TSHZ2     | 0.571349 | 0.112664 | 0.793891 |
| SH2B1     | 0.208023 | 0.599275 | 0.502982 |
| CTPS2     | 0.546147 | 0.052831 | 0.778738 |
| POLE3     | 0.031578 | 1.492462 | 0.214075 |
| CHRA1     | 0.431975 | 0.788672 | 0.696978 |
| PRTFDC1   | 0.216064 | 0.857473 | 0.512741 |
| SMYD2     | 0.649093 | 0.223127 | 0.839222 |
| SDR39U1   | 0.053673 | -0.9212  | 0.271145 |
| AAAS      | 0.147661 | 0.379551 | 0.436386 |
| YAE1D1    | 0.300882 | 0.242774 | 0.602797 |
| SNRK      | 0.634013 | -0.11647 | 0.832269 |
| DISC1     | 0.010923 | 1.372041 | 0.127049 |
| CCL28     | 0.760702 | 0.368567 | 0.897929 |
| PCDHB16   | 0.340315 | 0.324045 | 0.627258 |

|            |          |          |          |
|------------|----------|----------|----------|
| ABCB10     | 0.347172 | 0.420225 | 0.632606 |
| BAZ1A      | 0.047453 | 0.92933  | 0.255923 |
| STRN4      | 0.199513 | 0.132319 | 0.49217  |
| SLC2A9     | 0.513476 | 0.212426 | 0.75602  |
| IL17RB     | 0.556057 | 0.113918 | 0.783439 |
| OLFML3     | 0.939534 | 0.077092 | 0.986498 |
| AASDHPPT   | 0.244338 | -0.30452 | 0.547425 |
| METTL5     | 0.260666 | 0.542968 | 0.56373  |
| OSTC       | 0.646028 | 1.227596 | 0.837353 |
| CMC2       | 0.157086 | 0.616063 | 0.447022 |
| SDHAF3     | 0.294734 | -0.9378  | 0.597932 |
| PLSCR4     | 0.711814 | 0.370308 | 0.870161 |
| SMCO4      | 0.070995 | -1.23476 | 0.311134 |
| CYTL1      | 0.992139 | -0.06861 | 1        |
| CDC42SE2   | 0.299182 | 0.078088 | 0.602219 |
| DROSHA     | 0.619    | 0.187319 | 0.822688 |
| UBQLN4     | 0.000329 | 0.750555 | 0.015317 |
| CDC42SE1   | 0.455561 | 0.963417 | 0.71417  |
| TMPRSS4    | 0.546261 | -0.47776 | 0.778738 |
| SNX15      | 0.92904  | 0.56472  | 0.983115 |
| HEBP1      | 0.035078 | -0.36301 | 0.223337 |
| RAB6B      | 0.93369  | -0.12532 | 0.984157 |
| APOBEC3C   | 0.866424 | 0.104761 | 0.953042 |
| DUSP22     | 0.625609 | 0.454709 | 0.828579 |
| VPS45      | 0.004157 | 0.394379 | 0.073531 |
| PNO1       | 0.892432 | -0.10764 | 0.966699 |
| MRPL17     | 0.804634 | -0.04808 | 0.918848 |
| NDUFA4L2   | 0.290981 | 0.847836 | 0.595183 |
| PHPT1      | 0.986843 | -0.09226 | 1        |
| SERINC1    | 0.26578  | 1.00345  | 0.568807 |
| INIP       | 0.134764 | 1.132674 | 0.417833 |
| ARHGAP35   | 0.192667 | 0.26047  | 0.486094 |
| FAM114A2   | 0.181644 | 0.156614 | 0.472575 |
| PLSCR3     | 0.997368 | 0.52473  | 1        |
| AGPAT4     | 0.011319 | 1.910425 | 0.128971 |
| AGPAT3     | 0.364426 | -0.12748 | 0.646996 |
| HELLS      | 0.103355 | 0.912034 | 0.366609 |
| C1GALT1    | 0.53709  | 0.224485 | 0.773175 |
| LTBP3      | 1.04E-07 | 1.742282 | 2.45E-05 |
| GLRX2      | 0.638802 | 0.137613 | 0.834211 |
| THSD1      | 0.055814 | -0.54705 | 0.276127 |
| TNFRSF19   | 0.384669 | 0.20731  | 0.66413  |
| TOMM22     | 0.167008 | 0.244675 | 0.457139 |
| MBIP       | 0.289643 | 0.898474 | 0.593134 |
| CHST7      | 0.69117  | 0.160228 | 0.860356 |
| LANCL2     | 0.632496 | 0.006869 | 0.830965 |
| KIF15      | 0.522527 | -0.15374 | 0.763249 |
| TM7SF3     | 0.261211 | -0.84586 | 0.564363 |
| SEMA3G     | 0.638802 | 0.146595 | 0.834211 |
| SLC22A11   | 0.671985 | 0.231886 | 0.851286 |
| CTNNBIP1   | 0.427267 | -0.68863 | 0.69413  |
| KRT82      | 0.331588 | -0.11841 | 0.619341 |
| HOMER2     | 0.071983 | -0.87892 | 0.313575 |
| HOMER3     | 0.014224 | 1.305053 | 0.145268 |
| ST6GALNAC1 | 0.208535 | 0.800702 | 0.503054 |
| FARSB      | 0.665709 | -0.05347 | 0.847351 |
| IARS2      | 0.759058 | 0.058086 | 0.896847 |
| C1orf112   | 0.149664 | 0.406866 | 0.439016 |



|          |          |          |          |
|----------|----------|----------|----------|
| FAM207A  | 0.025487 | 1.146991 | 0.193268 |
| SAMSN1   | 0.045356 | 1.156976 | 0.250872 |
| KLC4     | 0.244338 | -0.0786  | 0.547425 |
| CENPM    | 0.626197 | 0.133924 | 0.828579 |
| TREX1    | 0.224659 | 0.917878 | 0.523685 |
| NRBP2    | 0.111611 | -1.00648 | 0.381945 |
| BMP2K    | 4.91E-05 | 0.78246  | 0.003559 |
| STARD5   | 0.021086 | 1.414099 | 0.173882 |
| ATG3     | 0.305036 | 0.162697 | 0.606083 |
| SIRT3    | 0.684989 | -0.18149 | 0.85709  |
| PDS5B    | 0.97106  | 0.003687 | 0.997592 |
| SMC4     | 0.552567 | 0.194008 | 0.783393 |
| MAN2C1   | 0.211163 | 0.425975 | 0.506632 |
| SACM1L   | 0.347246 | -0.19233 | 0.632606 |
| OLA1     | 0.825116 | 0.109727 | 0.930395 |
| CUTC     | 0.437286 | -0.48079 | 0.70193  |
| ECHDC1   | 0.35064  | -0.34557 | 0.635657 |
| RNF146   | 0.707463 | -0.19828 | 0.869179 |
| RBM12    | 0.098469 | 0.293171 | 0.357719 |
| TBC1D22B | 0.901123 | -0.14728 | 0.971583 |
| MDN1     | 0.115676 | 0.468357 | 0.387731 |
| LYRM2    | 0.166562 | -0.78046 | 0.457139 |
| GINM1    | 0.105925 | -0.43399 | 0.370605 |
| ZBTB40   | 0.437082 | 0.350899 | 0.70185  |
| ACSS1    | 0.199513 | -0.35954 | 0.49217  |
| ZCCHC3   | 0.064547 | 1.092227 | 0.296805 |
| ZDHHC18  | 0.19682  | 0.626019 | 0.490309 |
| CCM2L    | 0.145176 | 0.460555 | 0.433769 |
| PDRG1    | 0.122338 | 0.966946 | 0.398255 |
| TMEM14B  | 0.322009 | 0.152298 | 0.613139 |
| DECR2    | 0.153213 | -0.7342  | 0.443165 |
| ABHD10   | 0.026002 | 0.443255 | 0.193808 |
| TCP11L1  | 0.00037  | 1.542591 | 0.016741 |
| STAU2    | 0.078755 | 0.837924 | 0.32578  |
| C19orf66 | 0.848286 | 0.59819  | 0.944084 |
| DDX28    | 0.251236 | 0.583083 | 0.555182 |
| SLC39A9  | 0.652505 | 0.172248 | 0.840332 |
| TMEM106B | 0.533062 | -0.20148 | 0.7709   |
| LMBRD1   | 0.586283 | -0.48162 | 0.801141 |
| BLOC1S4  | 0.462056 | 0.034244 | 0.718747 |
| TRMT13   | 0.416958 | 0.245952 | 0.687847 |
| LIN7C    | 0.45805  | -0.16173 | 0.715224 |
| AGPAT5   | 0.121914 | 0.71176  | 0.397343 |
| TXLNG    | 0.458045 | -0.29912 | 0.715224 |
| SPATS2L  | 0.004611 | 0.821982 | 0.078316 |
| UFSP2    | 0.887225 | -0.06099 | 0.96416  |
| ABCF3    | 0.019715 | 0.472686 | 0.1684   |
| FAM49B   | 0.609213 | 0.044919 | 0.816529 |
| AP5S1    | 0.143605 | 0.465893 | 0.431666 |
| ABCB8    | 0.252443 | 0.437526 | 0.555643 |
| FAM105A  | 0.976317 | -0.39015 | 0.998921 |
| DDX19A   | 0.031791 | 0.320497 | 0.214212 |
| SPTLC3   | 0.871947 | -0.12118 | 0.95627  |
| GIMAP4   | 0.804634 | -0.15188 | 0.918848 |
| TDP1     | 0.120635 | 0.682305 | 0.39573  |
| POT1     | 0.982375 | 0.068861 | 1        |
| TBC1D23  | 0.001789 | 1.054045 | 0.044281 |
| DCAF13   | 0.43831  | 0.425778 | 0.701933 |

|            |          |          |          |
|------------|----------|----------|----------|
| TMEM100    | 0.568515 | -0.35959 | 0.791838 |
| IMP3       | 0.036531 | 0.584713 | 0.229165 |
| NUDT15     | 0.100924 | 1.089983 | 0.361901 |
| MRGBP      | 0.038864 | 0.701837 | 0.236232 |
| TMEM39A    | 0.073265 | 0.866973 | 0.31592  |
| TYW1;TYW1B | 0.752463 | -0.23157 | 0.893529 |
| EXOC1      | 0.364426 | 0.120185 | 0.646996 |
| INTS9      | 0.027355 | 0.808268 | 0.199874 |
| TMEM30A    | 0.32085  | -0.29654 | 0.613139 |
| UQCC1      | 0.554951 | 0.037373 | 0.783439 |
| SEPTIN11   | 0.001215 | 0.416629 | 0.034268 |
| TMEM184C   | 0.310964 | -1.07739 | 0.609894 |
| SLC38A7    | 0.00038  | 2.379036 | 0.016995 |
| MED17      | 0.221781 | 0.346271 | 0.520147 |
| PARVA      | 0.001272 | 0.487571 | 0.034924 |
| USP40      | 0.545246 | 0.347901 | 0.778738 |
| PANK4      | 0.09581  | 0.251546 | 0.352331 |
| FBXO28     | 0.246709 | 0.319562 | 0.549922 |
| TBC1D13    | 0.918562 | 0.13762  | 0.978657 |
| EXD2       | 0.419078 | 0.458659 | 0.688796 |
| DNAJC11    | 0.269226 | 0.314604 | 0.571371 |
| INTS7      | 0.133455 | 0.709909 | 0.416228 |
| TMLHE      | 0.199469 | 0.617172 | 0.49217  |
| FANCI      | 0.062726 | 1.02792  | 0.292924 |
| ATAD3A     | 0.934288 | 0.047787 | 0.984157 |
| ARL8B      | 0.255193 | -0.27978 | 0.557593 |
| FGFR1OP2   | 0.719189 | -0.66723 | 0.874478 |
| EVA1B      | 0.453566 | -0.4663  | 0.712914 |
| PRMT7      | 0.201482 | 0.564885 | 0.49489  |
| DNAJC17    | 0.523132 | 0.485083 | 0.763931 |
| ASUN       | 0.153276 | 0.259491 | 0.443165 |
| RIC8B      | 0.281331 | 0.235747 | 0.583877 |
| GNL3L      | 0.048956 | 1.154928 | 0.259694 |
| DDX18      | 0.965801 | 0.00569  | 0.99616  |
| ASF1B      | 0.190786 | 0.642778 | 0.484103 |
| DZANK1     | 0.759161 | 0.289037 | 0.896874 |
| FAIM       | 0.056125 | 1.342543 | 0.276683 |
| KLHL11     | 0.30824  | 0.547796 | 0.609284 |
| INTS10     | 0.0334   | 0.644761 | 0.219585 |
| DNAAF2     | 0.69077  | 0.202134 | 0.86005  |
| MRPS18A    | 0.606075 | -0.38825 | 0.814786 |
| PNPO       | 0.67051  | 0.020148 | 0.850681 |
| ARMC1      | 0.729121 | -0.02914 | 0.879656 |
| POLR3E     | 0.074729 | 0.587175 | 0.318513 |
| SDAD1      | 0.017975 | 1.392465 | 0.162611 |
| TMEM38B    | 0.092448 | 1.08797  | 0.347013 |
| MTPAP      | 0.301931 | 0.439942 | 0.603275 |
| AIG1       | 0.551353 | 0.035942 | 0.782077 |
| HAUS2      | 0.244419 | 0.665267 | 0.547425 |
| NLE1       | 0.00635  | 1.255015 | 0.094329 |
| KBTBD4     | 0.932694 | -0.04636 | 0.984157 |
| NECAP2     | 0.031269 | 0.381227 | 0.212999 |
| ZNF358     | 0.089503 | 0.389183 | 0.341477 |
| POLR3B     | 0.392268 | 0.533131 | 0.671013 |
| RBM28      | 0.128409 | -0.55469 | 0.407846 |
| ANO10      | 0.09982  | 0.317747 | 0.359216 |
| RBM22      | 0.036237 | 0.281945 | 0.227448 |
| BSDC1      | 0.729121 | 0.19375  | 0.879656 |

|           |          |          |          |
|-----------|----------|----------|----------|
| GPATCH2   | 0.006364 | 0.855522 | 0.094355 |
| ATP5SL    | 0.768941 | 0.120458 | 0.901915 |
| WDR70     | 0.498911 | 0.223301 | 0.744839 |
| TMEM51    | 0.046508 | 1.664334 | 0.253921 |
| MED9      | 0.100009 | 1.2232   | 0.359674 |
| RBFOX1    | 0.331588 | -0.14783 | 0.619341 |
| ARGLU1    | 0.292717 | -0.6087  | 0.595788 |
| IFT57     | 0.707758 | 0.269231 | 0.869179 |
| TMEM248   | 0.217891 | 0.453787 | 0.515383 |
| RNF216    | 0.096294 | 0.370644 | 0.353641 |
| SPATA6    | 0.186982 | -0.28428 | 0.479162 |
| SLTM      | 0.809743 | 0.046666 | 0.921586 |
| ZNHIT6    | 0.010683 | 1.489667 | 0.125661 |
| ASNSD1    | 0.292894 | 0.428203 | 0.595821 |
| CUEDC1    | 0.53191  | 0.353985 | 0.77068  |
| FKBP14    | 0.000108 | 2.870824 | 0.006676 |
| GPATCH2L  | 0.291769 | 0.258774 | 0.595183 |
| PAG1      | 0.695622 | -0.23857 | 0.862317 |
| C14orf119 | 0.238106 | 0.657692 | 0.540624 |
| CCDC109B  | 0.203722 | 0.746297 | 0.497963 |
| PIH1D1    | 0.174016 | 0.857447 | 0.466074 |
| FAM118A   | 0.267436 | 0.524322 | 0.570195 |
| RMND1     | 0.850884 | 0.351303 | 0.944945 |
| ZNF446    | 0.523974 | 0.35752  | 0.764023 |
| PAK1IP1   | 0.031765 | 0.884371 | 0.214212 |
| HIF1AN    | 0.239021 | 0.777946 | 0.541047 |
| AURKAIP1  | 0.711083 | -0.1608  | 0.870136 |
| OXSM      | 0.908102 | -0.14353 | 0.9734   |
| GID8      | 0.015914 | 0.389842 | 0.153751 |
| MRPL22    | 0.073311 | 1.031202 | 0.31592  |
| C1orf123  | 0.528742 | -0.11765 | 0.767576 |
| BABAM1    | 0.121915 | 0.191592 | 0.397343 |
| CLN6      | 0.263334 | 0.59887  | 0.565873 |
| NMRK1     | 0.258501 | 0.846006 | 0.560954 |
| ASB6      | 0.291151 | 0.409314 | 0.595183 |
| THG1L     | 0.46151  | 0.353252 | 0.718747 |
| C4orf27   | 0.399875 | 0.096301 | 0.67622  |
| IRAK4     | 0.071133 | 0.884923 | 0.311134 |
| UCKL1     | 0.568169 | 0.394461 | 0.791838 |
| GEMIN8    | 0.038799 | 1.169465 | 0.236048 |
| TMEM160   | 0.764432 | 0.126563 | 0.899556 |
| TXNL4B    | 0.116476 | 0.767013 | 0.389223 |
| NLRP2     | 0.963206 | -0.10775 | 0.995704 |
| C1orf109  | 0.808416 | 0.066735 | 0.921586 |
| FAM120C   | 0.94475  | 0.240202 | 0.988547 |
| TRNAU1AP  | 0.315847 | 0.749995 | 0.613139 |
| COMMD8    | 0.382127 | -0.07596 | 0.661698 |
| NDUFB11   | 0.179497 | 0.244499 | 0.471072 |
| SDHAF2    | 0.151566 | 1.079345 | 0.441443 |
| MRPL16    | 0.144001 | 0.042554 | 0.431666 |
| NHP2      | 0.892438 | 0.156508 | 0.966699 |
| FAM206A   | 0.308969 | 0.497571 | 0.609864 |
| OCIAD1    | 0.902877 | 0.01334  | 0.971583 |
| ADPRHL2   | 0.675324 | 0.199464 | 0.853175 |
|           | 5-Mar    | 0.109698 | 0.488048 |
| RHBDL2    | 0.908949 | 0.1009   | 0.974118 |
| HYPK      | 0.404051 | 0.411429 | 0.678271 |
| RAB20     | 0.921149 | 0.064563 | 0.980655 |

|          |          |          |          |
|----------|----------|----------|----------|
| LYAR     | 0.037428 | 0.640472 | 0.231646 |
| TMEM161A | 0.871811 | -0.09765 | 0.956216 |
| IMPAD1   | 0.000337 | 0.698614 | 0.015578 |
| CHCHD3   | 0.97106  | 0.007891 | 0.997592 |
| MED29    | 0.123677 | -0.70562 | 0.399565 |
| DUS2     | 0.071634 | 0.885274 | 0.312422 |
| CMTM6    | 0.006924 | 2.287681 | 0.099739 |
| TMEM260  | 0.028095 | 1.056921 | 0.203207 |
| SYBU     | 0.57342  | -0.22307 | 0.795273 |
| SIRT5    | 0.546147 | 0.033659 | 0.778738 |
| MKS1     | 0.518766 | 0.278707 | 0.760272 |
| GFOD1    | 0.042808 | -0.97488 | 0.244479 |
| MIOS     | 0.010589 | -0.45048 | 0.124802 |
| MTMR10   | 0.992034 | -0.02924 | 1        |
| SMPD4    | 0.520146 | 0.097478 | 0.760272 |
| CWC25    | 0.662423 | 0.279623 | 0.845642 |
| TEX10    | 0.008575 | 0.72313  | 0.111496 |
| ZDHHC7   | 0.863483 | 0.100974 | 0.951788 |
| THUMPD1  | 0.908103 | -0.18117 | 0.9734   |
| P4HTM    | 0.012846 | 1.358029 | 0.138596 |
| PPP1R14D | 0.041924 | 1.617424 | 0.242175 |
| TOR4A    | 0.840557 | 0.033092 | 0.939212 |
| TRMT1    | 0.565757 | 0.314793 | 0.79107  |
| PGPEP1   | 0.369906 | 0.789927 | 0.653181 |
| FBXL12   | 0.12446  | 0.984363 | 0.40081  |
| ARHGEF38 | 0.52842  | -0.34398 | 0.767576 |
| GDAP2    | 0.524424 | 0.146638 | 0.764023 |
| NDE1     | 0.000172 | 0.968158 | 0.009509 |
| ANKRD10  | 0.81719  | -0.0678  | 0.926828 |
| BRE      | 0.419078 | -0.05383 | 0.688796 |
| ING3     | 0.672694 | 0.437567 | 0.851987 |
| QPCTL    | 0.093206 | 0.619925 | 0.347256 |
| ARL15    | 0.300393 | 0.202547 | 0.602797 |
| KCTD5    | 0.001776 | 1.716686 | 0.044269 |
| CDKN2AIP | 0.819984 | 0.363421 | 0.92687  |
| DNAJB12  | 0.44615  | -0.27897 | 0.706795 |
| ALKBH4   | 0.513352 | 0.417531 | 0.75602  |
| NSMCE4A  | 0.04962  | 0.383009 | 0.261364 |
| DDX43    | 0.382354 | -0.24701 | 0.661883 |
| GAR1     | 0.684992 | 0.026579 | 0.85709  |
| STAB1    | 0.09193  | 0.480005 | 0.345626 |
| CLEC5A   | 0.005097 | 2.071464 | 0.083708 |
| SLC39A1  | 0.000677 | 2.225345 | 0.024383 |
| PPP4R2   | 0.222358 | 0.28295  | 0.520729 |
| DPP3     | 0.609213 | -0.0366  | 0.816529 |
| CLDND1   | 0.249041 | 0.254516 | 0.552533 |
| CACNA2D2 | 0.005794 | -1.83114 | 0.089494 |
| SMPD3    | 0.008147 | -1.27726 | 0.108342 |
| AATF     | 0.043543 | 0.742558 | 0.247494 |
| SLC2A8   | 0.574397 | 0.38294  | 0.796031 |
| DDX56    | 0.46607  | 0.563396 | 0.721065 |
| B3GNT2   | 0.427256 | 0.525535 | 0.69413  |
| TERF2IP  | 0.000626 | 0.578047 | 0.023434 |
| ABI2     | 0.016258 | 1.271143 | 0.154646 |
| DNAH9    | 0.133198 | 0.606181 | 0.416228 |
| FAM53C   | 0.257625 | 0.451829 | 0.560462 |
| BCLAF1   | 0.098469 | 0.291137 | 0.357719 |
| ZDHHC3   | 0.782768 | 0.158924 | 0.909458 |

|          |          |          |          |
|----------|----------|----------|----------|
| UTP6     | 0.216168 | 0.285951 | 0.512741 |
| PSD3     | 0.037619 | 0.826482 | 0.232686 |
| COA4     | 0.124833 | -0.581   | 0.401334 |
| TAB2     | 0.057721 | 1.0604   | 0.280499 |
| TLR7     | 0.087181 | 0.854896 | 0.338202 |
| MRPL39   | 0.211314 | 0.199508 | 0.506632 |
| ZAK      | 0.42286  | 0.436223 | 0.691467 |
| FKBP11   | 0.053686 | 0.405205 | 0.271145 |
| TMOD3    | 0.024706 | 0.202658 | 0.190022 |
| BET1L    | 0.038035 | 0.53711  | 0.233324 |
| RASL12   | 0.351465 | -0.41664 | 0.636424 |
| ELOVL5   | 0.354055 | 0.378443 | 0.638094 |
| MIS18A   | 0.810389 | -0.03156 | 0.921889 |
| CELSR1   | 0.212057 | -0.58724 | 0.507864 |
| NKIRAS2  | 0.746288 | -0.22259 | 0.889626 |
| NKIRAS1  | 0.420028 | -0.34122 | 0.690152 |
| WSB2     | 0.993518 | 0.026772 | 1        |
| PLEK2    | 0.111705 | 1.097315 | 0.382146 |
| UGGT2    | 0.025281 | 1.04735  | 0.192573 |
| UGGT1    | 0.015071 | 0.251071 | 0.150049 |
| CDK12    | 0.011127 | 1.375943 | 0.128152 |
| RRN3     | 0.453311 | -0.41706 | 0.712914 |
| FASTKD2  | 0.665709 | 0.250002 | 0.847351 |
| TVP23B   | 0.147197 | 0.893729 | 0.436386 |
| SLC25A37 | 0.638802 | 0.106703 | 0.834211 |
| GTSE1    | 0.726238 | -0.26961 | 0.878089 |
| SIGLEC8  | 0.414362 | 0.317797 | 0.685923 |
| TECR     | 0.400346 | -0.06563 | 0.67622  |
| ERAP1    | 0.255193 | 0.172376 | 0.557593 |
| UBAP1    | 0.033373 | 0.718481 | 0.219585 |
| PLA2G3   | 0.322009 | 0.097535 | 0.613139 |
| ACTR10   | 0.887225 | 0.194683 | 0.96416  |
| PSENEN   | 0.322009 | 0.19731  | 0.613139 |
| USE1     | 0.482377 | 0.119935 | 0.733586 |
| CISD1    | 0.052873 | 0.210902 | 0.269122 |
| GGA3     | 0.604241 | 0.178224 | 0.813002 |
| PODXL2   | 0.066032 | 0.671878 | 0.300455 |
| C9orf78  | 0.161512 | 1.135253 | 0.453012 |
| RTEL1    | 0.045973 | 0.417219 | 0.252361 |
| CLIC5    | 0.00237  | -2.51829 | 0.052884 |
| FAM120A  | 0.72417  | 0.027847 | 0.876654 |
| MOCS1    | 0.852939 | -0.10132 | 0.946466 |
| TREM2    | 0.273877 | 0.746762 | 0.577625 |
| GDE1     | 0.550538 | -0.05214 | 0.781327 |
| EHF      | 0.739418 | -0.24439 | 0.886294 |
| WWOX     | 0.533391 | 0.626449 | 0.7709   |
| SMARCAL1 | 0.044568 | 0.75851  | 0.24851  |
| GLTP     | 0.965801 | -0.07301 | 0.99616  |
| AHSP     | 0.087408 | -1.46725 | 0.338845 |
| SPG21    | 0.031791 | 0.302478 | 0.214212 |
| MRPL35   | 0.841813 | -0.14982 | 0.940237 |
| PLAC8    | 0.545521 | -0.56922 | 0.778738 |
| NINJ2    | 0.241572 | 0.847022 | 0.544139 |
| GPRC5B   | 0.657812 | 0.295496 | 0.842898 |
| IL37     | 0.937694 | 0.175847 | 0.986498 |
| GRHL1    | 0.798715 | -0.07279 | 0.916173 |
| UBP1     | 0.017412 | 0.430483 | 0.159467 |
| IGF2BP1  | 0.792343 | 0.140316 | 0.913596 |

|          |          |          |          |
|----------|----------|----------|----------|
| EIF2AK3  | 0.220856 | 0.578027 | 0.519064 |
| COQ3     | 0.770826 | 0.084577 | 0.903336 |
| MTCH1    | 0.955289 | -0.00974 | 0.993074 |
| NUDT4    | 0.041861 | 0.68311  | 0.242066 |
| CECR1    | 0.9081   | -0.40759 | 0.9734   |
| HSPBP1   | 0.093209 | 0.377589 | 0.347256 |
| RGL1     | 0.123603 | 0.516769 | 0.399439 |
| MAT2B    | 0.71923  | -0.03733 | 0.874478 |
| MYOF     | 0.002838 | 0.27384  | 0.060074 |
| ITSN2    | 0.897655 | -0.13849 | 0.969793 |
| GLTSCR1  | 0.051109 | 1.326195 | 0.265139 |
| GLTSCR2  | 0.353046 | 0.776252 | 0.638094 |
| EHD3     | 0.419078 | 0.075159 | 0.688796 |
| EHD2     | 0.528742 | -0.15272 | 0.767576 |
| ARHGEF12 | 0.71923  | -0.05267 | 0.874478 |
| CNOT2    | 0.041135 | 0.881597 | 0.240826 |
| C1RL     | 0.964486 | 0.057745 | 0.99616  |
| NCKIPSD  | 0.623137 | 0.061449 | 0.825978 |
| CD274    | 0.41479  | 0.664881 | 0.686028 |
| TMOD2    | 0.894964 | 0.223746 | 0.968678 |
| CALML5   | 0.356774 | 0.858666 | 0.641472 |
| OGFR     | 0.181644 | 0.167712 | 0.472575 |
| FLRT3    | 0.468053 | -0.3942  | 0.722799 |
| LMCD1    | 0.131757 | 0.28292  | 0.413476 |
| CRIM1    | 0.277593 | 0.333063 | 0.579677 |
| SEPN1    | 0.464187 | 0.350422 | 0.721065 |
| MPP6     | 0.871617 | 0.127395 | 0.956098 |
| CHMP5    | 0.060571 | 0.390105 | 0.287134 |
| COMMD9   | 0.161013 | 0.212497 | 0.453012 |
| CNIH4    | 0.923804 | -0.16704 | 0.980751 |
| CWC15    | 0.654347 | 0.656997 | 0.842019 |
| MRPL15   | 0.277896 | 0.408688 | 0.579677 |
| THYN1    | 0.311298 | -0.2327  | 0.609894 |
| CRIP1    | 0.380513 | -0.68294 | 0.661698 |
| NDUFAF4  | 0.590866 | 0.230788 | 0.804875 |
| HACD3    | 0.422885 | 0.143731 | 0.691467 |
| MED11    | 0.947074 | -0.15513 | 0.989967 |
| CCDC167  | 0.076138 | 1.195767 | 0.321815 |
| KLK14    | 0.980555 | 0.112746 | 1        |
| EMC3     | 0.108241 | 0.323865 | 0.374055 |
| NDUFA13  | 0.247021 | 0.246396 | 0.549922 |
| PDP1     | 0.181644 | 0.249147 | 0.472575 |
| KCMF1    | 0.887113 | -0.01286 | 0.96416  |
| ADAM22   | 0.99433  | -0.09006 | 1        |
| RAI14    | 0.000502 | 0.498365 | 0.020488 |
| FOXJ2    | 0.123954 | 0.862264 | 0.400153 |
| VAPA     | 0.799534 | -0.03037 | 0.916173 |
| AKAP7    | 0.796103 | -0.20889 | 0.914603 |
| H2AFY2   | 0.145824 | 0.561661 | 0.434185 |
| MRPL27   | 0.509493 | -0.31077 | 0.753337 |
| TBC1D7   | 0.042259 | 1.144094 | 0.243142 |
| RNF181   | 0.960185 | 0.092986 | 0.994122 |
| C6orf203 | 0.507366 | -0.54607 | 0.75153  |
| GSKIP    | 0.213664 | 1.051339 | 0.509228 |
| COX16    | 0.073618 | 1.399492 | 0.316471 |
| ORMDL1   | 0.927689 | 0.082118 | 0.983115 |
| TMEM14C  | 0.604241 | 0.965828 | 0.813002 |
| TMEM9    | 0.19883  | 1.053595 | 0.49217  |

|           |          |          |          |
|-----------|----------|----------|----------|
| TOMM7     | 0.645537 | -0.43266 | 0.837353 |
| SENP1     | 0.287108 | 0.665255 | 0.590535 |
| CXXC1     | 0.41358  | 0.183388 | 0.685243 |
| SH3BP4    | 0.000248 | 1.242503 | 0.012326 |
| SLAMF8    | 0.312629 | 0.432689 | 0.610776 |
| SEPTIN10  | 0.145824 | -0.31927 | 0.434185 |
| HMG20B    | 0.137886 | 0.671983 | 0.423394 |
| PIPOX     | 0.533465 | 0.165675 | 0.7709   |
| GMIP      | 0.586319 | 0.332225 | 0.801141 |
| NTM       | 0.000904 | 2.102834 | 0.028881 |
| ABRACL    | 0.347246 | 0.207197 | 0.632606 |
| VPS54     | 0.687798 | 0.215819 | 0.859243 |
| MDFIC     | 0.017026 | 1.12479  | 0.157888 |
| ZNRD1     | 0.363607 | 0.485826 | 0.646996 |
| ACTR3B    | 0.080193 | -0.91318 | 0.326714 |
| TMEM63C   | 0.973327 | -0.02685 | 0.998921 |
| PIM2      | 0.322009 | 0.135232 | 0.613139 |
| CAMSAP3   | 0.316413 | -0.41723 | 0.613139 |
| PHRF1     | 0.491562 | 0.740316 | 0.739769 |
| ZBTB4     | 0.385624 | -0.55617 | 0.664306 |
| CALCOCO1  | 0.10353  | 1.053675 | 0.366863 |
| KIAA1522  | 0.121449 | -0.48603 | 0.397343 |
| POGK      | 0.126056 | 1.055174 | 0.403148 |
| CCDC88C   | 0.565699 | -0.28388 | 0.79107  |
| ARHGAP23  | 0.797226 | -0.19911 | 0.915298 |
| STIM2     | 0.231078 | 0.459411 | 0.531962 |
| VPS18     | 0.077655 | 0.202663 | 0.324641 |
| RCC2      | 0.45805  | 0.109774 | 0.715224 |
| KIAA1468  | 0.200669 | 0.436517 | 0.494233 |
| DIP2B     | 0.06524  | 0.245031 | 0.298136 |
| KIAA1462  | 0.007608 | 1.061095 | 0.10525  |
| SLAIN2    | 0.006002 | 1.192059 | 0.090802 |
| TENM3     | 0.896819 | -0.04468 | 0.969793 |
| USP36     | 0.751732 | 0.24116  | 0.89314  |
| BCCIP     | 0.960544 | 0.1292   | 0.994122 |
| STK26     | 0.694713 | -0.03395 | 0.861478 |
| ARMCX1    | 0.148492 | 1.067938 | 0.438051 |
| HIGD1B    | 1        | -0.02956 | 1        |
| COPZ2     | 1.74E-08 | 2.868948 | 6.25E-06 |
| ABI3      | 0.863801 | -0.32424 | 0.951898 |
| PTGFRN    | 0.001527 | 0.85955  | 0.040048 |
| CTTNBP2NL | 0.135945 | 1.027375 | 0.419757 |
| CFAP97    | 0.452169 | -0.62474 | 0.712157 |
| TMEM181   | 0.406729 | -0.47834 | 0.680612 |
| IBTK      | 0.240566 | 0.515941 | 0.543847 |
| CHD7      | 0.304504 | 0.583849 | 0.606083 |
| HEATR5B   | 0.434427 | 0.260679 | 0.698194 |
| ZNFX1     | 0.01453  | 0.828258 | 0.147184 |
| CHPF2     | 6.99E-05 | 1.804794 | 0.00473  |
| RRBP1     | 0.206534 | 0.186516 | 0.500256 |
| SIPA1L2   | 5.33E-06 | 2.512505 | 0.000591 |
| ZNF319    | 0.756763 | -0.06488 | 0.896333 |
| ANKIB1    | 0.011592 | 1.073653 | 0.129699 |
| IFT80     | 0.8035   | -0.01787 | 0.918848 |
| CPSF2     | 0.028771 | 0.355171 | 0.204946 |
| KLHL9     | 0.33829  | 0.50013  | 0.625538 |
| LARS      | 0.478274 | 0.031674 | 0.730754 |
| TXNDC16   | 0.377688 | 0.494839 | 0.659304 |

|          |          |          |          |
|----------|----------|----------|----------|
| RCOR3    | 0.056205 | 1.331348 | 0.276683 |
| MYEF2    | 0.315145 | -0.2385  | 0.613139 |
| KLHL42   | 0.005219 | 1.180573 | 0.085005 |
| EIF2AK4  | 0.108028 | 0.852126 | 0.374055 |
| WDR35    | 0.400124 | 0.394647 | 0.67622  |
| TBC1D14  | 0.438587 | -0.22593 | 0.701933 |
| CGN      | 0.694713 | -0.3465  | 0.861478 |
| ARHGAP28 | 0.167109 | 0.416084 | 0.457139 |
| RBM27    | 0.088176 | 0.58805  | 0.339301 |
| KANSL3   | 0.018048 | 1.134966 | 0.162744 |
| NYNRIN   | 0.981892 | -0.08478 | 1        |
| HECW2    | 0.221922 | -0.72027 | 0.520366 |
| FRMD4A   | 0.4531   | 0.080135 | 0.712914 |
| ANKFY1   | 0.179497 | 0.120486 | 0.471072 |
| RERE     | 0.942956 | 0.01943  | 0.988547 |
| SUCLA2   | 0.934288 | -0.03932 | 0.984157 |
| WRAP73   | 0.057896 | 1.25746  | 0.280499 |
| GMPR2    | 0.434427 | -0.20903 | 0.698194 |
| PSMC3IP  | 0.657906 | -0.15571 | 0.842898 |
| STX18    | 0.908103 | 0.006519 | 0.9734   |
| DPM3     | 0.809738 | 1.040733 | 0.921586 |
| IMPACT   | 0.245568 | 0.403491 | 0.549555 |
| ZNF219   | 0.031304 | 0.999696 | 0.212999 |
| UVRAG    | 0.222159 | 0.38044  | 0.520592 |
| HLA-DRB1 | 0.026002 | -0.63454 | 0.193808 |
| ATXN10   | 0.149515 | 0.416486 | 0.438811 |
| MBD2     | 0.057903 | 1.04571  | 0.280499 |
| NCDN     | 0.267786 | 0.455998 | 0.570195 |
| TFIP11   | 0.382127 | 0.282553 | 0.661698 |
| NFKBIL1  | 0.270581 | 0.376066 | 0.573699 |
| EPS15L1  | 0.305036 | 0.161913 | 0.606083 |
| SPRR3    | 0.310183 | 0.306316 | 0.609864 |
| ORC3     | 0.201821 | 0.276861 | 0.495032 |
| SAE1     | 0.317645 | 0.275074 | 0.613139 |
| MAGEC2   | 0.988991 | 0.048467 | 1        |
| COPG2    | 0.627809 | -0.03188 | 0.828932 |
| RNF7     | 0.876741 | -0.15743 | 0.958859 |
| PI4KB    | 0.035509 | 0.937336 | 0.225173 |
| MRC2     | 8.05E-08 | 1.023186 | 2.13E-05 |
| XPR1     | 0.001272 | 1.363205 | 0.034924 |
| COMMD3   | 0.034511 | 0.256912 | 0.222148 |
| STOML1   | 0.533043 | -0.38812 | 0.7709   |
| GNG12    | 0.162993 | 0.211161 | 0.453012 |
| HECA     | 0.017913 | 1.428844 | 0.162312 |
| MTRR     | 0.105233 | 1.241473 | 0.369374 |
| UXT      | 0.221618 | 0.700268 | 0.519874 |
| ASH2L    | 0.026447 | 0.59597  | 0.195939 |
| CPNE7    | 0.571349 | 0.076797 | 0.793891 |
| PEMT     | 0.399322 | -0.68805 | 0.67622  |
| DHCR7    | 0.78936  | -0.10848 | 0.911483 |
| CACNG4   | 0.988991 | 0.013302 | 1        |
| HDAC6    | 0.882017 | 0.033202 | 0.961515 |
| SPAST    | 0.216679 | 0.893543 | 0.513611 |
| DKK3     | 0.042469 | 1.460002 | 0.243142 |
| METTL1   | 0.91835  | -0.20558 | 0.978657 |
| GULP1    | 0.960544 | 0.252549 | 0.994122 |
| VPS29    | 0.301936 | 0.092042 | 0.603275 |
| EIF3K    | 0.013502 | 0.415048 | 0.141812 |



|           |          |          |          |
|-----------|----------|----------|----------|
| EXTL2     | 0.046544 | 1.403461 | 0.253921 |
| GRHPR     | 0.81486  | 0.011733 | 0.924847 |
| CTSZ      | 0.173168 | 0.176153 | 0.464476 |
| CKLF      | 0.012696 | 1.444558 | 0.13791  |
| RPS6KB2   | 0.171765 | 1.110566 | 0.463065 |
| DNAJB9    | 0.347655 | 0.71702  | 0.632935 |
| DNAJB11   | 0.000268 | 0.52743  | 0.01304  |
| RNF14     | 0.167925 | 0.575369 | 0.458281 |
| SUCO      | 0.069315 | 0.878138 | 0.30702  |
| UBA2      | 0.577274 | 0.132582 | 0.796634 |
| CTNNAL1   | 0.464493 | -0.2987  | 0.721065 |
| DKK2      | 0.009531 | 1.42535  | 0.118512 |
| FAM8A1    | 0.568237 | 0.264802 | 0.791838 |
| MORF4L1   | 0.568237 | 0.211478 | 0.791838 |
| NXF1      | 0.051278 | 0.310308 | 0.265139 |
| SEL1L     | 0.025563 | 0.254917 | 0.193268 |
| B4GALT7   | 0.121079 | 0.893624 | 0.396833 |
| PEF1      | 0.784286 | 0.071465 | 0.909506 |
| BIN2      | 0.554951 | -0.05053 | 0.783439 |
| ZMYM2     | 0.485039 | 0.170416 | 0.735617 |
| COPS7A    | 0.830256 | -0.0255  | 0.933615 |
| CTSF      | 0.859019 | -0.13041 | 0.949415 |
| SLC25A10  | 0.739057 | -0.1076  | 0.886253 |
| FBLN5     | 0.133456 | -0.46836 | 0.416228 |
| KLK11     | 0.810508 | 0.045945 | 0.921889 |
| CLN8      | 0.154416 | 0.963957 | 0.444958 |
| HSPB7     | 0.175042 | 0.776569 | 0.466796 |
| PPP1R1B   | 0.503438 | -0.57852 | 0.747774 |
| AASS      | 0.12513  | -0.38657 | 0.401334 |
| CLIP2     | 0.825116 | -0.0265  | 0.930395 |
| UQCR10    | 0.162993 | 0.262358 | 0.453012 |
| ZMAT5     | 0.163587 | 0.458713 | 0.453012 |
| SEC14L4   | 0.203111 | -0.54771 | 0.497506 |
| MTFP1     | 0.453859 | 0.433174 | 0.712914 |
| TJP2      | 0.159052 | -0.32205 | 0.449897 |
| DNAJB4    | 0.005764 | 1.105551 | 0.089283 |
| MALT1     | 0.080575 | 0.72422  | 0.327829 |
| STK17A    | 0.019439 | 1.280059 | 0.167517 |
| CFDP1     | 0.004336 | 1.863683 | 0.075379 |
| ZNF629    | 0.060283 | 1.156164 | 0.287134 |
| DAXX      | 0.445875 | 0.293607 | 0.706795 |
| FTSJ1     | 0.178168 | -0.81902 | 0.469506 |
| VTI1B     | 0.35064  | 0.181617 | 0.635657 |
| MARCO     | 0.930697 | 0.115792 | 0.984157 |
| STK39     | 0.249724 | 0.35061  | 0.552833 |
| ADD3      | 0.902877 | -0.05753 | 0.971583 |
| PLEKHB1   | 0.481732 | 0.16551  | 0.733586 |
| FBXL17    | 0.947123 | -0.1495  | 0.989967 |
| ZBTB47    | 0.217891 | 0.277048 | 0.515383 |
| LRWD1     | 0.019032 | 0.713977 | 0.166597 |
| CNOT8     | 0.080922 | 1.14547  | 0.328405 |
| C19orf25  | 0.330591 | -0.03883 | 0.619341 |
| NIPSNAP3A | 0.017724 | 1.011573 | 0.161012 |
| CGGBP1    | 0.025123 | 0.705139 | 0.191949 |
| IFT172    | 0.68188  | 0.091999 | 0.856967 |
| GIMAP2    | 0.087761 | 1.145482 | 0.339301 |
| PISD      | 0.874117 | 0.310201 | 0.957716 |
| ABCF2     | 0.020065 | 0.457694 | 0.169555 |

|          |          |          |          |
|----------|----------|----------|----------|
| MTRF1L   | 0.945776 | 0.129181 | 0.989025 |
| SLC23A2  | 0.182882 | 0.545945 | 0.474175 |
| TES      | 0.554955 | -0.07081 | 0.783439 |
| PRKAG2   | 0.667993 | 0.216578 | 0.849281 |
| TUBGCP4  | 0.344551 | 0.377505 | 0.630804 |
| STAP2    | 0.03305  | 1.284538 | 0.21845  |
| SERGEF   | 0.003948 | 1.634892 | 0.071362 |
| KDM5B    | 0.058278 | 0.937724 | 0.281667 |
| DMBT1    | 0.091605 | -1.40213 | 0.345626 |
| FETUB    | 0.729616 | 0.498409 | 0.880062 |
| WARS2    | 0.392996 | 0.086773 | 0.671013 |
| CD300A   | 0.112485 | 1.043782 | 0.382523 |
| PARP2    | 0.971687 | 0.173346 | 0.997592 |
| LIMD1    | 0.061485 | -0.37042 | 0.289565 |
| POLL     | 0.696142 | -0.16144 | 0.862864 |
| SEC63    | 0.382127 | 0.100392 | 0.661698 |
| CACFD1   | 0.472922 | 0.315473 | 0.727018 |
| SLC2A6   | 0.427094 | 0.573193 | 0.694051 |
| ZC3H7B   | 0.470127 | 0.193512 | 0.72456  |
| SUSD2    | 0.108958 | -0.30041 | 0.375995 |
| TCF20    | 0.001385 | 1.721843 | 0.037197 |
| HMGXB4   | 0.550442 | 0.359452 | 0.781327 |
| NDRG3    | 0.073319 | 0.524394 | 0.31592  |
| SEPTIN3  | 0.049205 | 1.323352 | 0.260606 |
| APOBEC3B | 0.033781 | 1.506861 | 0.221141 |
| ARMCX3   | 0.486499 | 0.181619 | 0.73612  |
| SWAP70   | 0.1068   | 0.178208 | 0.371671 |
| EBF1     | 0.937694 | 0.17138  | 0.986498 |
| MLX      | 0.574275 | 0.319145 | 0.795974 |
| SUN2     | 0.343873 | 0.245803 | 0.630156 |
| SS18L2   | 0.68818  | 0.245518 | 0.859429 |
| RSL24D1  | 0.509733 | 0.363737 | 0.753592 |
| LAMTOR3  | 0.981581 | -0.03248 | 1        |
| NDOR1    | 0.204944 | 0.464079 | 0.499348 |
| LIMA1    | 0.007049 | 0.368752 | 0.100623 |
| AFF4     | 0.5726   | 0.337973 | 0.794481 |
| SRP68    | 0.43056  | 0.127049 | 0.695651 |
| CNTNAP2  | 0.575621 | 0.188909 | 0.796634 |
| MKRN1    | 0.251715 | -0.6899  | 0.555643 |
| CHORDC1  | 0.374984 | 0.288953 | 0.656862 |
| TBK1     | 0.004244 | 0.449316 | 0.074174 |
| SEPTIN9  | 0.153276 | 0.147416 | 0.443165 |
| UBQLN2   | 0.070198 | 0.333282 | 0.309184 |
| STEAP1   | 0.000849 | 2.54312  | 0.027766 |
| EGFL7    | 0.355703 | -0.71178 | 0.640269 |
| TRPS1    | 0.650206 | 0.09187  | 0.839222 |
| PCSK1N   | 0.889831 | -0.1433  | 0.96614  |
| PCYOX1   | 0.939534 | -0.03039 | 0.986498 |
| SLC7A8   | 0.087897 | 1.283465 | 0.339301 |
| DDX20    | 0.668036 | 0.593054 | 0.849281 |
| ADAMTS1  | 1        | -0.01409 | 1        |
| SHPK     | 0.424783 | -0.00795 | 0.693599 |
| PGAP2    | 0.247451 | 0.423418 | 0.550658 |
| AMACR    | 0.879415 | -0.09086 | 0.96104  |
| DPP7     | 0.913333 | 0.060931 | 0.975706 |
| POLG2    | 0.003221 | 1.915931 | 0.065092 |
| TMEM2    | 0.32085  | 0.445182 | 0.613139 |
| USP25    | 0.05293  | 0.871633 | 0.269285 |

|           |          |          |          |
|-----------|----------|----------|----------|
| RSPH14    | 0.980555 | 0.028235 | 1        |
| NARF      | 0.009931 | 1.142908 | 0.120767 |
| BCAP29    | 0.255147 | -0.16533 | 0.557593 |
| CYB5R1    | 0.554955 | -0.09705 | 0.783439 |
| BAIAP2L1  | 0.764071 | -0.06686 | 0.899242 |
| SAP30BP   | 0.133396 | 0.5775   | 0.416228 |
| ZNHIT2    | 0.285467 | 0.736953 | 0.589814 |
| MED13     | 0.124063 | 0.69778  | 0.400153 |
| PFDN2     | 0.442223 | 0.064376 | 0.703704 |
| GPN3      | 0.016912 | 1.605657 | 0.157224 |
| SLC12A6   | 0.165222 | 1.004345 | 0.455049 |
| PUF60     | 0.003297 | 0.506874 | 0.065524 |
| EMR2      | 0.473115 | 0.508606 | 0.727018 |
| NRBP1     | 0.012538 | 0.593534 | 0.136468 |
| ENOPH1    | 0.764084 | 0.191499 | 0.899242 |
| FEZ2      | 0.762717 | 0.270608 | 0.899242 |
| EVL       | 1        | -0.02372 | 1        |
| NDUFA12   | 0.632496 | 0.04542  | 0.830965 |
| EIF2B4    | 0.965801 | -0.12099 | 0.99616  |
| ATP6V1H   | 0.44615  | 0.074074 | 0.706795 |
| RABAC1    | 0.010038 | 0.991809 | 0.12115  |
| TAGLN3    | 0.037785 | 1.742853 | 0.233205 |
| DMGDH     | 0.657397 | 0.089937 | 0.842898 |
| IPO11     | 0.14113  | 0.802299 | 0.427981 |
| TRMT112   | 0.78936  | -0.15367 | 0.911483 |
| GLS2      | 0.441773 | -0.671   | 0.703704 |
| DACH1     | 0.421971 | 0.320493 | 0.691467 |
| FTSJ2     | 0.695601 | 0.248086 | 0.862317 |
| DNAI1     | 0.027176 | 0.768331 | 0.199264 |
| CYTH4     | 0.095845 | 1.057035 | 0.352341 |
| XPO7      | 0.035078 | 0.38081  | 0.223337 |
| CD84      | 0.117978 | 0.232606 | 0.392116 |
| LCMT1     | 0.608408 | -0.08489 | 0.816529 |
| VPS51     | 0.490639 | 0.153969 | 0.738656 |
| TEKT2     | 0.716634 | -0.20178 | 0.873394 |
| MUTYH     | 0.312494 | 0.136675 | 0.610732 |
| BAZ2B     | 0.250602 | -0.43831 | 0.554113 |
| BAZ2A     | 0.387864 | 0.547811 | 0.666532 |
| BAZ1B     | 0.694713 | 0.06772  | 0.861478 |
| SLCO3A1   | 0.711134 | 0.140592 | 0.870136 |
| ATPIF1    | 0.079337 | -1.37525 | 0.32578  |
| HERC5     | 0.096862 | 0.681151 | 0.354489 |
| AK3       | 0.223612 | -0.21169 | 0.521792 |
| DAPK2     | 0.469887 | -0.42935 | 0.72456  |
| SCOC      | 0.020421 | 0.645142 | 0.170514 |
| PHF11     | 0.293316 | 0.652174 | 0.596247 |
| FKBPL     | 0.553176 | 0.232058 | 0.783439 |
| LNPEP     | 0.000673 | 0.561548 | 0.024319 |
| MBD1      | 0.771635 | 0.195844 | 0.903336 |
| SIX4      | 0.385295 | 0.535412 | 0.664306 |
| CNOT7     | 0.035068 | 0.111458 | 0.223337 |
| SERPINB13 | 0.992139 | 0.00454  | 1        |
| PLXNA1    | 0.000596 | 1.103364 | 0.022651 |
| KCNG1     |          | 0        |          |
| GGT7      | 0.660099 | -0.03113 | 0.844596 |
| RABGEF1   | 0.000962 | 0.562804 | 0.02981  |
| MSRA      | 0.076552 | -0.37541 | 0.322705 |
| NAGK      | 0.05791  | 0.334911 | 0.280499 |

|           |          |          |          |
|-----------|----------|----------|----------|
| CD207     | 0.332769 | 0.919902 | 0.62046  |
| ANXA10    | 0.707926 | 0.353242 | 0.869179 |
| HACL1     | 0.875933 | -0.10041 | 0.958859 |
| STAG3     | 0.375847 | 0.289865 | 0.657392 |
| TRMT6     | 0.448077 | -0.24224 | 0.708126 |
| ENPP5     | 0.342453 | 0.539478 | 0.629771 |
| HOOK1     | 0.082151 | -0.34925 | 0.330671 |
| SH3BGRL2  | 0.347233 | -0.29197 | 0.632606 |
| RIMS3     | 0.322009 | 0.128247 | 0.613139 |
| RASAL2    | 0.007037 | 1.473971 | 0.100623 |
| MOSPD1    | 0.296639 | -0.43613 | 0.599275 |
| METRNL    | 0.051649 | -1.06056 | 0.266309 |
| RPUSD1    | 0.331588 | -0.0998  | 0.619341 |
| GNPTG     | 0.381753 | 0.691133 | 0.661698 |
| TSR3      | 0.408552 | 0.325417 | 0.681493 |
| ERRFI1    | 0.45638  | 0.356028 | 0.714931 |
| HAO1      | 0.988991 | 0.079806 | 1        |
| LAMP5     | 0.149822 | 0.711982 | 0.439247 |
| SLC25A13  | 0.955289 | -0.00656 | 0.993074 |
| LEF1      | 0.079293 | 0.387414 | 0.32578  |
| FOXD3     | 1        | -0.03497 | 1        |
| DBNL      | 0.094502 | 0.176435 | 0.349959 |
| MID2      | 0.513881 | -0.39094 | 0.756193 |
| DDX41     | 0.694713 | 0.089275 | 0.861478 |
| DCTN4     | 0.774166 | -0.08083 | 0.903913 |
| TINAG     | 0.440215 | -0.15051 | 0.70314  |
| CDC23     | 0.19721  | 0.536321 | 0.490309 |
| ANAPC7    | 0.002    | 0.877794 | 0.047089 |
| ANAPC5    | 0.11027  | 0.487588 | 0.378797 |
| ANAPC4    | 0.001458 | 1.008045 | 0.038912 |
| ANAPC2    | 0.009163 | 1.481436 | 0.116274 |
| HSPB8     | 0.781585 | 0.084306 | 0.908746 |
| GGA2      | 0.897645 | 0.332234 | 0.969793 |
| GGA1      | 0.43056  | -0.0584  | 0.695651 |
| STOML2    | 0.175259 | 0.225424 | 0.466796 |
| FBXO2     | 0.034089 | -1.09465 | 0.221621 |
| NAGPA     | 0.19661  | 0.81081  | 0.490309 |
| ZNF580    | 0.181133 | -0.33397 | 0.472575 |
| CCRN4L    | 0.993518 | -0.03456 | 1        |
| VPS28     | 0.029749 | 0.217594 | 0.208169 |
| LSM7      | 0.686515 | -0.67838 | 0.858125 |
| ING1      | 0.125859 | 0.779492 | 0.403148 |
| SERPINA10 | 0.280679 | 0.619185 | 0.583434 |
| CCNL1     | 0.456484 | 0.318853 | 0.714992 |
| DBR1      | 0.228671 | 0.324688 | 0.528484 |
| FAM208A   | 0.028056 | 0.824883 | 0.203111 |
| FEM1B     | 0.988072 | -0.01216 | 1        |
| HN1       | 0.114834 | 1.411642 | 0.387168 |
| FBXO9     | 0.178963 | 0.44174  | 0.471072 |
| FBXO3     | 0.052048 | 0.652941 | 0.267367 |
| FBXL4     | 0.392539 | -0.37801 | 0.671013 |
| AKAP11    | 0.078996 | 0.736125 | 0.32578  |
| PTBP2     | 0.592726 | 0.305057 | 0.806337 |
| FBXW11    | 0.010209 | 1.328088 | 0.121876 |
| DNAJC12   | 0.502926 | -0.52355 | 0.747596 |
| GMEB2     | 0.071301 | 1.23596  | 0.311339 |
| MRTO4     | 0.897655 | -0.00101 | 0.969793 |
| TNIK      | 0.755324 | 0.136299 | 0.895563 |

|           |          |          |          |
|-----------|----------|----------|----------|
| CPSF3     | 0.208914 | 0.212765 | 0.503054 |
| PITPNC1   | 0.2536   | 0.736703 | 0.557407 |
| APPL1     | 0.44615  | -0.09894 | 0.706795 |
| CROT      | 0.003883 | 1.505148 | 0.071121 |
| CDC42EP3  | 0.957511 | 0.019437 | 0.994122 |
| TLK1      | 0.512152 | -0.67923 | 0.754954 |
| PILRA     | 0.493121 | -0.47867 | 0.741084 |
| GPATCH8   | 0.09143  | 0.544013 | 0.345626 |
| PARP4     | 0.231232 | 0.160013 | 0.531962 |
| NXT1      | 0.035396 | 1.302631 | 0.224714 |
| NUDT5     | 0.918567 | 0.094608 | 0.978657 |
| RCOR1     | 0.389353 | 0.26129  | 0.667643 |
| PCTP      | 0.903871 | 0.075336 | 0.972246 |
| MAN1B1    | 0.130075 | 0.390624 | 0.410899 |
| RALY      | 0.45805  | 0.109869 | 0.715224 |
| GTF3C4    | 0.216173 | 0.239981 | 0.512741 |
| ADAMTS7   | 0.460714 | 0.416601 | 0.718473 |
| ADAM28    | 0.000798 | 1.974609 | 0.026879 |
| KLK12     | 0.310183 | 0.376919 | 0.609864 |
| C14orf1   | 0.40063  | 1.286363 | 0.676417 |
| PACSIN3   | 0.043207 | -0.29567 | 0.246126 |
| IKZF2     | 0.211643 | 0.474743 | 0.507094 |
| FBXO4     | 0.898878 | 0.28576  | 0.970641 |
| FBXL3     | 0.083536 | 0.341265 | 0.333074 |
| FBXW2     | 0.053305 | 1.097856 | 0.270697 |
| IKZF3     | 0.980639 | -0.00515 | 1        |
| ACSL6     | 0.829403 | 0.044456 | 0.933615 |
| ACAD8     | 0.015348 | -0.77516 | 0.151713 |
| ANGPTL2   | 0.000132 | 1.826994 | 0.007794 |
| ACIN1     | 0.057044 | 0.297422 | 0.278658 |
| AMFR      | 0.000513 | 1.215    | 0.020674 |
| AGO2      | 0.266378 | 0.142747 | 0.568807 |
| VAV3      | 0.045416 | 0.853394 | 0.250872 |
| MYH2      | 0.287388 | 0.168792 | 0.590811 |
| ITGA11    | 9.87E-11 | 4.302804 | 2.74E-07 |
| NUP50     | 0.077655 | 0.451017 | 0.324641 |
| PRND      | 0.429099 | -0.37837 | 0.695651 |
| ZHX1      | 0.439122 | 0.369825 | 0.702684 |
| POMT2     | 0.085223 | 0.868939 | 0.335537 |
| CDV3      | 0.145824 | 0.486997 | 0.434185 |
| CNOT11    | 0.000229 | 1.305876 | 0.011713 |
| PCOLCE2   | 0.339533 | 0.567976 | 0.626687 |
| DSE       | 0.12807  | 0.673276 | 0.407582 |
| INTS6     | 0.16099  | 0.307772 | 0.453012 |
| SARDH     | 0.465247 | 0.333272 | 0.721065 |
| BAG5      | 0.181644 | 0.252115 | 0.472575 |
| CFAP45    | 0.928788 | 0.115549 | 0.983115 |
| TBX21     | 1        | -0.05612 | 1        |
| AGO1      | 0.153275 | 0.351422 | 0.443165 |
| RAB21     | 0.117214 | 0.175237 | 0.389929 |
| RAB22A    | 0.374984 | 0.256882 | 0.656862 |
| TRAPPC2L  | 0.013858 | 1.288119 | 0.144006 |
| ZNF346    | 0.199864 | 0.694037 | 0.492817 |
| PNMA3     | 0.319672 | -0.24741 | 0.613139 |
| PNMA2     | 0.085907 | -0.21691 | 0.335964 |
| BLOC1S6   | 0.079437 | 0.029037 | 0.325919 |
| PSME2     | 0.442223 | 0.126896 | 0.703704 |
| TMPRSS11E | 0.834322 | 0.0745   | 0.935999 |

|           |          |          |          |
|-----------|----------|----------|----------|
| TAOK2     | 0.294061 | 0.248447 | 0.597112 |
| MKLN1     | 0.360629 | 0.587523 | 0.644411 |
| DNPEP     | 0.04253  | -0.32348 | 0.243142 |
| EMCN      | 0.124055 | 0.487769 | 0.400153 |
| RAB23     | 3.20E-05 | 1.083542 | 0.00243  |
| MCTS1     | 0.027356 | 0.424164 | 0.199874 |
| ACSL5     | 0.097132 | -0.38998 | 0.354489 |
| PADI1     | 0.559081 | 0.091431 | 0.78633  |
| ZDHHHC8   | 0.22359  | 0.356607 | 0.521792 |
| OGDHL     | 0.767772 | 0.015325 | 0.901915 |
| MTUS1     | 0.665225 | -0.11447 | 0.847351 |
| BRPF3     | 0.480014 | 0.307475 | 0.732402 |
| WWC3      | 0.013989 | 1.157792 | 0.144006 |
| DENND2A   | 0.084914 | -0.6166  | 0.335537 |
| FAM184B   | 0.496663 | 0.441296 | 0.74366  |
| PALD1     | 0.322021 | 0.601131 | 0.613139 |
| SLC39A10  | 0.002023 | 1.960545 | 0.047528 |
| INO80     | 0.592662 | 0.249924 | 0.806337 |
| CCPG1     | 0.586195 | 1.015171 | 0.801141 |
| KIDINS220 | 0.266378 | 0.118    | 0.568807 |
| ASAP1     | 0.055344 | 0.596741 | 0.274516 |
| MKL2      | 0.238156 | 0.732181 | 0.540624 |
| ATAD2B    | 0.649217 | 0.266414 | 0.839222 |
| HEG1      | 0.113954 | 0.726225 | 0.385201 |
| ODF2L     | 0.420246 | -0.24426 | 0.690386 |
| ZBTB21    | 0.189865 | 0.477628 | 0.483202 |
| ZMIZ1     | 0.02786  | 0.790984 | 0.202223 |
| ANKRD50   | 0.536165 | -0.32323 | 0.773175 |
| PPP1R9A   | 0.039    | -1.28843 | 0.236232 |
| GRID1     | 0.094945 | -0.49555 | 0.35136  |
| MED23     | 0.007479 | 0.69053  | 0.10395  |
| VANGL2    | 0.216541 | 0.86087  | 0.513504 |
| PLEKHG1   | 0.049132 | 0.839263 | 0.260355 |
| PLXNB3    | 0.940415 | -0.11277 | 0.987142 |
| PRR12     | 0.085768 | 0.809313 | 0.335537 |
| SHROOM4   | 0.593687 | 0.276121 | 0.806337 |
| YEATS2    | 0.039105 | 0.904829 | 0.236232 |
| PNMAL2    | 0.867645 | -0.02199 | 0.954126 |
| NDRG4     | 0.540968 | 0.218229 | 0.775521 |
| TBC1D24   | 0.075458 | -0.96584 | 0.320055 |
| STRIP2    | 0.993518 | -0.13558 | 1        |
| TPCN1     | 0.850863 | -0.10457 | 0.944945 |
| ISY1      | 0.061482 | 0.593001 | 0.289565 |
| PPM1H     | 0.550501 | 0.437788 | 0.781327 |
| PAIP2B    | 0.933487 | 0.152778 | 0.984157 |
| TMCC3     | 0.569282 | 0.329882 | 0.792806 |
| TTC7A     | 0.665692 | 0.041378 | 0.847351 |
| HECTD1    | 0.008575 | 0.372711 | 0.111496 |
| ZMYND8    | 0.563832 | 0.309946 | 0.789479 |
| CADPS     | 0.902553 | -0.0053  | 0.971583 |
| MYO5B     | 0.337116 | -0.62595 | 0.624371 |
| FZD4      | 0.960709 | 0.135608 | 0.994122 |
| CIZ1      | 0.134935 | 0.663174 | 0.417833 |
| CORO1C    | 0.003027 | 0.402499 | 0.062294 |
| CBLC      | 0.517846 | 0.052972 | 0.760014 |
| TPX2      | 0.309175 | 0.553612 | 0.609864 |
| ABT1      | 0.02979  | 1.534297 | 0.208193 |
| PADI3     | 0.540968 | 0.17121  | 0.775521 |

|          |          |          |          |
|----------|----------|----------|----------|
| NOB1     | 0.108191 | 0.974007 | 0.374055 |
| AKAP8L   | 0.101186 | 0.340793 | 0.361901 |
| MAFF     | 0.035298 | 1.345992 | 0.224243 |
| CLEC4E   | 0.322009 | 0.115804 | 0.613139 |
| PYCARD   | 0.257958 | 0.206015 | 0.560462 |
| TMCO1    | 0.627809 | -0.05706 | 0.828932 |
| SLC7A7   | 0.017868 | 1.629328 | 0.162035 |
| PADI4    | 0.370809 | 0.636029 | 0.65423  |
| FZR1     | 0.10747  | 0.592994 | 0.372977 |
| ANAPC10  | 0.961416 | 0.006171 | 0.994503 |
| HPCAL4   | 0.399008 | 0.513639 | 0.67622  |
| MGAT4A   | 0.028373 | 0.899556 | 0.20366  |
| EPDR1    | 0.295754 | -0.57853 | 0.598344 |
| HHLA2    | 0.229605 | 0.451995 | 0.529537 |
| NOTCH3   | 4.14E-06 | 1.534008 | 0.000478 |
| MYO6     | 0.247021 | -0.30032 | 0.549922 |
| ALK      | 0.473815 | 0.329209 | 0.727018 |
| COL17A1  | 0.405656 | 0.532728 | 0.679973 |
| ICAM5    | 0.39165  | -0.43403 | 0.670235 |
| KMT2B    | 0.015904 | 0.82613  | 0.153751 |
| DDX19B   | 0.004247 | 1.334498 | 0.074174 |
| PPT2     | 0.375847 | 0.25589  | 0.657392 |
| CLEC4A   | 7.23E-05 | 2.059799 | 0.00483  |
| NFU1     | 0.887225 | 0.075331 | 0.96416  |
| PRPF19   | 0.169043 | 0.130005 | 0.459676 |
| SYNPO2   | 0.374958 | 0.481588 | 0.656862 |
| USP18    | 0.993646 | 0.048665 | 1        |
| UBQLN1   | 0.030249 | 0.409757 | 0.209418 |
| SUFU     | 0.088907 | 0.794157 | 0.341082 |
| BOK      | 0.340995 | -0.34232 | 0.628026 |
| NENF     | 0.298858 | 0.308099 | 0.601676 |
| NOL7     | 0.683323 | 0.998041 | 0.85709  |
| SNX12    | 0.438315 | -0.00715 | 0.701933 |
| SYNRG    | 0.520009 | 0.504363 | 0.760272 |
| DAPP1    | 0.079329 | 0.899942 | 0.32578  |
| NDRG2    | 0.761569 | -0.00179 | 0.898761 |
| VPS4A    | 0.194929 | 0.114446 | 0.488911 |
| PCDHB8   | 0.022585 | 0.769993 | 0.180886 |
| PCDHGC3  | 0.798715 | 0.049262 | 0.916173 |
| SLC6A14  | 0.190925 | -1.15496 | 0.484342 |
| SOX13    | 0.31899  | 0.19542  | 0.613139 |
| L1RE1    | 0.233222 | 1.062902 | 0.535403 |
| G3BP2    | 0.083367 | 0.239106 | 0.332962 |
| ADAMTS5  | 0.088427 | 0.815184 | 0.339985 |
| ARHGAP26 | 0.002058 | -1.12027 | 0.048148 |
| POLI     | 0.285292 | -0.29281 | 0.589561 |
| RPH3AL   | 0.019765 | -1.19617 | 0.1684   |
| STUB1    | 0.098469 | -0.24012 | 0.357719 |
| PACSIN2  | 0.068179 | -0.23756 | 0.303928 |
| MAGED2   | 0.131757 | 0.2592   | 0.413476 |
| SNX7     | 0.014839 | 1.723854 | 0.149757 |
| SNX6     | 0.073319 | 0.217959 | 0.31592  |
| DUSP12   | 0.083058 | 1.225491 | 0.332962 |
| STX8     | 0.04253  | 0.339417 | 0.243142 |
| PLA2G2D  | 0.496019 | 0.374969 | 0.743024 |
| ANGEL1   | 0.346723 | 0.294172 | 0.632606 |
| SSR3     | 0.466082 | 0.209083 | 0.721065 |
| ING4     | 0.807146 | -0.1525  | 0.920997 |

|          |          |          |          |
|----------|----------|----------|----------|
| PSMD13   | 0.09581  | 0.233517 | 0.352331 |
| FAF1     | 0.507378 | 0.67555  | 0.75153  |
| PROCR    | 0.632477 | 0.308812 | 0.830965 |
| ST3GAL5  | 0.790941 | -0.21426 | 0.912928 |
| PPIE     | 0.929044 | 0.051853 | 0.983115 |
| ABCG2    | 0.807541 | 0.152042 | 0.921159 |
| DIMT1    | 0.355724 | 0.703074 | 0.640269 |
| TIMELESS | 0.01917  | 0.74511  | 0.166914 |
| COPS3    | 0.12513  | 0.147718 | 0.401334 |
| RABL2B   | 0.179341 | 0.812065 | 0.471072 |
| MINPP1   | 0.097022 | 0.563758 | 0.354489 |
| NOVA2    | 0.668274 | 0.287792 | 0.849395 |
| RPL26L1  | 0.834232 | 0.002678 | 0.935999 |
| WDR3     | 0.269226 | 0.253523 | 0.571371 |
| TTF2     | 0.083101 | 0.946658 | 0.332962 |
| NSFL1C   | 0.44615  | 0.179805 | 0.706795 |
| C19orf53 | 0.200849 | 1.024988 | 0.494233 |
| FZD1     | 0.012959 | 1.318796 | 0.139171 |
| PLA2G4C  | 0.130772 | 0.813223 | 0.412748 |
| COG5     | 0.241676 | 0.182775 | 0.544139 |
| SLC12A4  | 0.03232  | 0.526804 | 0.215938 |
| SRPK3    | 0.992139 | -0.02845 | 1        |
| FLVCR2   | 0.041397 | 0.533207 | 0.240826 |
| AP4E1    | 0.137385 | 0.821616 | 0.422524 |
| MACF1    | 0.632496 | 0.139698 | 0.830965 |
| CEP131   | 0.085603 | 0.973936 | 0.335537 |
| SCAF8    | 0.374768 | 0.759941 | 0.656862 |
| PPP6R1   | 0.021148 | 0.338158 | 0.173882 |
| TRIM33   | 0.03339  | 0.907165 | 0.219585 |
| PHF8     | 0.59287  | 0.273806 | 0.806337 |
| KIAA1107 | 0.092612 | -0.40663 | 0.347013 |
| LIMCH1   | 0.121915 | -0.33815 | 0.397343 |
| AGAP1    | 0.675967 | -0.17486 | 0.853501 |
| PDZRN3   | 0.133624 | 0.54816  | 0.416228 |
| DOLK     | 0.003629 | 1.795312 | 0.069037 |
| TNRC6B   | 0.986123 | -0.04605 | 1        |
| PLCL2    | 0.003864 | 1.710455 | 0.071121 |
| SMG5     | 0.380902 | 0.615122 | 0.661698 |
| EXOC7    | 0.426712 | 0.131391 | 0.693599 |
| MAPK8IP3 | 0.319836 | -0.63079 | 0.613139 |
| ZC3H4    | 0.759058 | 0.334844 | 0.896847 |
| USP22    | 0.323436 | 0.523748 | 0.614309 |
| USP24    | 0.462056 | 0.268292 | 0.718747 |
| TBC1D2B  | 2.26E-05 | 0.850126 | 0.001867 |
| SAMD4A   | 0.019997 | 1.284338 | 0.169555 |
| CEP164   | 0.670751 | 0.099609 | 0.850681 |
| KIAA1045 | 0.988991 | 0.01826  | 1        |
| FOXJ3    | 0.005589 | 1.798149 | 0.088298 |
| AGTPBP1  | 0.197193 | -0.56588 | 0.490309 |
| SHANK2   | 0.762934 | -0.09221 | 0.899242 |
| DICER1   | 0.047431 | 0.817486 | 0.255923 |
| SLC7A11  | 0.683128 | 0.212847 | 0.85709  |
| WASF3    | 0.661627 | 0.247728 | 0.84482  |
| MAPRE3   | 0.366046 | -0.28628 | 0.648976 |
| HPS5     | 0.055291 | 0.836144 | 0.274516 |
| THSD7A   | 0.405498 | -0.08557 | 0.679973 |
| CORO2B   | 0.766003 | -0.21191 | 0.901309 |
| SHOC2    | 0.162    | 0.218766 | 0.453012 |



|           |          |          |          |
|-----------|----------|----------|----------|
| DNM3      | 0.809394 | -0.38111 | 0.921586 |
| SRRM2     | 0.028293 | 0.446659 | 0.203235 |
| NEU3      | 0.430203 | 0.178793 | 0.695651 |
| MGAT4B    | 0.165529 | 0.838612 | 0.455554 |
| PA2G4     | 0.871617 | -0.00894 | 0.956098 |
| CDK11A    | 0.102567 | 0.381527 | 0.364372 |
| SPG7      | 0.045294 | 0.512864 | 0.250872 |
| CTNND2    | 0.957511 | -0.15679 | 0.994122 |
| BAIAP2    | 0.734083 | 0.012157 | 0.882858 |
| GAB2      | 0.179535 | -0.43828 | 0.471072 |
| CLCA2     | 0.153189 | -0.48361 | 0.443165 |
| SMC3      | 0.694713 | 0.030932 | 0.861478 |
| HDAC5     | 0.34526  | 0.115365 | 0.631895 |
| CHMP2B    | 0.235002 | 1.163441 | 0.537072 |
| TNN       | 0.429962 | 0.437906 | 0.695651 |
| SCML2     | 0.148117 | 0.351303 | 0.437487 |
| ZNF148    | 0.000176 | 1.955659 | 0.009596 |
| LAMP3     | 0.015314 | -1.55201 | 0.151713 |
| TRPC6     | 0.247903 | -0.4023  | 0.551221 |
| MTMR6     | 1.89E-05 | 0.833674 | 0.001637 |
| NIP7      | 0.053272 | 0.737422 | 0.270654 |
| GNE       | 0.918559 | 0.16769  | 0.978657 |
| C14orf166 | 0.000876 | 0.322946 | 0.028311 |
| ENTPD4    | 0.045616 | 1.387948 | 0.251457 |
| TRAF3IP3  | 0.651372 | -0.74022 | 0.839222 |
| RUVBL2    | 0.049723 | 0.226036 | 0.261364 |
| CDYL      | 0.038447 | 1.172652 | 0.235202 |
| LIPT1     | 0.937694 | 0.061581 | 0.986498 |
| PIN4      | 0.819974 | 0.033998 | 0.92687  |
| CLEC11A   | 0.000748 | 1.917335 | 0.025761 |
| HIGD1A    | 0.595262 | 0.18708  | 0.806337 |
| AKT3      | 0.000577 | 1.943443 | 0.022453 |
| POMP      | 0.457206 | 0.39567  | 0.715224 |
| FAM50B    | 0.085979 | 0.541516 | 0.336126 |
| GINS2     | 0.029349 | 1.293096 | 0.207066 |
| LZTS1     | 0.001887 | 1.761734 | 0.045986 |
| HPSE      | 0.993964 | 0.029662 | 1        |
| RCE1      | 0.530116 | -0.73668 | 0.768664 |
| CCL26     | 0.331588 | -0.14231 | 0.619341 |
| CHKB      | 0.153213 | -0.40905 | 0.443165 |
| FOXA2     | 0.055017 | -1.29022 | 0.274516 |
| EIF3L     | 0.066208 | 0.166356 | 0.300455 |
| PLAA      | 0.039276 | 0.302024 | 0.236232 |
| RUVBL1    | 0.001243 | 0.305229 | 0.034693 |
| NUDC      | 0.554955 | 0.106431 | 0.783439 |
| TNFSF13B  | 0.11247  | 0.525951 | 0.382523 |
| BCS1L     | 0.680152 | 0.105103 | 0.85545  |
| VDAC3     | 0.378546 | 0.210085 | 0.659304 |
| VSIG4     | 0.872945 | -0.06156 | 0.956872 |
| CFL2      | 0.183806 | -0.54149 | 0.474829 |
| ERGIC3    | 0.11117  | 0.351435 | 0.380668 |
| FARSA     | 0.744041 | 0.051631 | 0.888303 |
| SIGLEC7   | 0.136065 | 0.655007 | 0.419892 |
| ITM2B     | 0.394825 | 0.230149 | 0.672349 |
| SLC5A6    | 0.111383 | 1.118007 | 0.381279 |
| MRPS33    | 0.791059 | 0.631671 | 0.91297  |
| ASF1A     | 0.111125 | 1.140207 | 0.380668 |
| DRG1      | 0.97106  | 0.121907 | 0.997592 |

|         |          |          |          |
|---------|----------|----------|----------|
| TRAPPC4 | 0.524435 | 0.062007 | 0.764023 |
| NCKAP1  | 0.581788 | 0.038375 | 0.797998 |
| B3GNT3  | 0.055065 | 1.292107 | 0.274516 |
| CNPY2   | 0.537409 | 0.07058  | 0.773175 |
| PIGL    | 0.057403 | 0.796693 | 0.279974 |
| VPS9D1  | 0.974304 | -0.04392 | 0.998921 |
| PKIG    | 0.642368 | 0.241501 | 0.835817 |
| EXOG    | 0.003047 | 1.553568 | 0.062575 |
| CA5B    | 0.472864 | 0.765817 | 0.727018 |
| SLC35A3 | 0.233812 | 0.368383 | 0.535403 |
| EXOC6B  | 0.568296 | 0.15823  | 0.791838 |
| AKAP2   | 0.646644 | -0.00259 | 0.837353 |
| ZNF652  | 0.933998 | -0.11426 | 0.984157 |
| DIP2C   | 0.092406 | 0.825686 | 0.347013 |
| MAN2B2  | 0.144731 | 0.49655  | 0.433371 |
| SLC9A8  | 0.922878 | 0.106065 | 0.980751 |
| ICE1    | 0.016622 | 0.649487 | 0.156319 |
| EFR3B   | 0.328    | 0.268228 | 0.618682 |
| CARD8   | 0.08167  | 1.073988 | 0.330094 |
| ATP11B  | 0.034509 | 0.791052 | 0.222148 |
| POFUT2  | 0.400341 | 0.412352 | 0.67622  |
| DNAJC16 | 0.453791 | 0.062829 | 0.712914 |
| SBNO2   | 0.31652  | 0.160889 | 0.613139 |
| DLGAP4  | 0.035078 | 0.774373 | 0.223337 |
| STK38L  | 0.069091 | 0.880445 | 0.306571 |
| INPP5F  | 0.57577  | 0.226523 | 0.796634 |
| PLEKHA6 | 0.902522 | 0.019918 | 0.971583 |
| FNDC3A  | 0.046008 | 0.356301 | 0.252361 |
| NISCH   | 0.365955 | -0.25758 | 0.648976 |
| NTNG1   | 0.94171  | 0.083586 | 0.988127 |
| PIKFYVE | 0.00505  | 1.026552 | 0.083219 |
| WDR37   | 0.371444 | -0.25991 | 0.65423  |
| TBC1D30 | 0.918445 | -0.12101 | 0.978657 |
| EPB41L3 | 0.360948 | 0.03829  | 0.644411 |
| AMOTL2  | 0.083601 | 0.86318  | 0.333173 |
| PADI2   | 0.252443 | 0.16785  | 0.555643 |
| ZBTB1   | 0.181771 | 0.559568 | 0.47269  |
| SIK3    | 0.054817 | 0.835645 | 0.274162 |
| R3HDM2  | 0.468001 | 0.171197 | 0.722799 |
| USP20   | 0.07481  | 0.845629 | 0.318513 |
| KDM2A   | 0.876808 | 0.110141 | 0.958859 |
| DIS3    | 0.013012 | 0.6942   | 0.139171 |
| TRAPPC8 | 0.14042  | 0.249115 | 0.426568 |
| LRCH1   | 0.000723 | 1.045928 | 0.025365 |
| SSUH2   | 0.319672 | -0.33998 | 0.613139 |
| SLC27A6 | 0.696781 | -0.00193 | 0.863213 |
| RCL1    | 0.25656  | -0.06589 | 0.560028 |
| ATP8A1  | 6.68E-05 | -2.01699 | 0.004599 |
| GSTK1   | 0.520146 | 0.039659 | 0.760272 |
| LAMTOR2 | 0.298858 | -0.16627 | 0.601676 |
| MRPS28  | 0.759022 | 0.273623 | 0.896847 |
| COA3    | 0.236413 | -0.21877 | 0.537858 |
| DDX52   | 0.174016 | 0.417522 | 0.466074 |
| MRPS17  | 0.59083  | -0.3677  | 0.804875 |
| MRPS7   | 0.089414 | 0.166005 | 0.341477 |
| CRYL1   | 0.415291 | 0.073668 | 0.686028 |
| TMA7    | 0.837756 | 0.255487 | 0.938161 |
| POLDIP2 | 0.404052 | 0.121415 | 0.678271 |

|         |          |          |          |
|---------|----------|----------|----------|
| AP3M1   | 0.006009 | 0.353428 | 0.090802 |
| GDA     | 0.484075 | 0.29931  | 0.735071 |
| YBX2    | 0.751648 | 0.058438 | 0.893136 |
| MAP3K2  | 0.099288 | 0.638979 | 0.358854 |
| LEMD3   | 0.32085  | 0.133075 | 0.613139 |
| CARHSP1 | 0.311298 | 0.228506 | 0.609894 |
| COG6    | 0.563832 | 0.044265 | 0.789479 |
| THRAP3  | 0.239034 | 0.221502 | 0.541047 |
| WBP11   | 0.14042  | 0.420288 | 0.426568 |
| TDRKH   | 0.590866 | 0.245464 | 0.804875 |
| MED16   | 0.152643 | 0.770911 | 0.443165 |
| NOP58   | 0.709387 | 0.057256 | 0.869179 |
| GIT1    | 0.194929 | 0.198248 | 0.488911 |
| UBE2D4  | 0.161733 | 0.503507 | 0.453012 |
| ZNF281  | 9.75E-05 | 2.208876 | 0.006217 |
| ARL2BP  | 0.022643 | 1.874348 | 0.180886 |
| POLR3K  | 0.57907  | -0.13793 | 0.796675 |
| PRG3    | 0.744045 | 0.314415 | 0.888303 |
| KLF13   | 0.207523 | 0.656402 | 0.502212 |
| SUGT1   | 0.098469 | 0.295632 | 0.357719 |
| MTO1    | 0.037838 | 1.200775 | 0.233324 |
| YARS2   | 0.083367 | 0.289113 | 0.332962 |
| COQ6    | 0.955288 | -0.35756 | 0.993074 |
| AMDHD2  | 0.535235 | 0.163129 | 0.772552 |
| ACOT9   | 0.167008 | 0.140922 | 0.457139 |
| AAR2    | 0.001956 | 0.657425 | 0.04685  |
| NOSIP   | 0.001708 | 1.012185 | 0.043008 |
| DERA    | 0.327323 | 0.157464 | 0.617719 |
| MEMO1   | 0.035078 | 0.322347 | 0.223337 |
| TMX2    | 0.646641 | -0.22363 | 0.837353 |
| FCF1    | 1        | 0.055932 | 1        |
| LSM2    | 0.466082 | 0.07094  | 0.721065 |
| SIGLEC9 | 0.150297 | 0.959308 | 0.440175 |
| KLK5    | 0.322009 | 0.145162 | 0.613139 |
| PLLP    | 0.055647 | -1.21361 | 0.275603 |
| SNX24   | 0.060289 | 1.031008 | 0.287134 |
| STARD10 | 0.043529 | -0.62907 | 0.247494 |
| IFT52   | 0.406996 | 0.443536 | 0.680612 |
| SH3GLB1 | 0.019371 | 0.228933 | 0.167192 |
| NDUFAF1 | 0.442968 | 0.275593 | 0.704366 |
| CAB39   | 0.228671 | 0.184992 | 0.528484 |
| LUC7L2  | 0.577274 | 0.079418 | 0.796634 |
| UBE2J1  | 0.446106 | 0.479727 | 0.706795 |
| RBMX2   | 0.810487 | -0.15929 | 0.921889 |
| DHRS7   | 0.604602 | -0.03056 | 0.813002 |
| MRPS2   | 0.494787 | -0.32935 | 0.741997 |
| COQ4    | 0.526467 | -0.30002 | 0.766077 |
| UTP11L  | 0.885338 | -0.14583 | 0.96416  |
| MOB4    | 0.18381  | 0.211174 | 0.474829 |
| RRP7A   | 0.379751 | 0.55951  | 0.661197 |
| SBDS    | 0.637197 | -0.15891 | 0.833511 |
| TMED5   | 0.646644 | 0.121726 | 0.837353 |
| EXOSC1  | 0.507055 | -0.41357 | 0.75153  |
| TMED7   | 0.007779 | 0.262734 | 0.105988 |
| SF3B6   | 0.546147 | 0.155777 | 0.778738 |
| EMC9    | 0.76149  | 0.499071 | 0.898761 |
| MRPL11  | 0.845718 | -0.00686 | 0.942239 |
| REXO2   | 0.03232  | 0.642461 | 0.215938 |

|          |          |          |          |
|----------|----------|----------|----------|
| RRP15    | 0.267194 | 0.958011 | 0.570195 |
| CCDC53   | 0.162989 | 0.399551 | 0.453012 |
| NOP16    | 0.627279 | -0.36184 | 0.828932 |
| TPRKB    | 0.373199 | 0.478138 | 0.656382 |
| RNF11    | 0.244817 | 0.896698 | 0.548206 |
| PPIL1    | 0.277896 | 0.136401 | 0.579677 |
| MED31    | 0.02515  | 1.650516 | 0.191949 |
| UFC1     | 0.960544 | -0.04179 | 0.994122 |
| FAM96B   | 0.204174 | 0.229116 | 0.497963 |
| MSRB2    | 0.554941 | 0.058413 | 0.783439 |
| MRPS16   | 0.048208 | 0.544646 | 0.257798 |
| MRPS18C  | 0.181386 | 1.245408 | 0.472575 |
| FIS1     | 0.97106  | -0.00121 | 0.997592 |
| PAM16    | 0.819984 | -0.18123 | 0.92687  |
| AK6      | 0.312593 | 0.694391 | 0.610776 |
| MRPS23   | 0.324076 | 0.1431   | 0.614309 |
| GOLT1B   | 0.003662 | 1.191914 | 0.06938  |
| HDGFRP3  | 0.454064 | 0.426675 | 0.712914 |
| BOLA1    | 0.029703 | 1.700302 | 0.208169 |
| PTRH2    | 0.347246 | 0.130811 | 0.632606 |
| CHMP3    | 0.702028 | -0.40846 | 0.866168 |
| STRAP    | 0.112657 | 0.238315 | 0.382523 |
| RTCB     | 0.000897 | 0.225242 | 0.028766 |
| FBXO7    | 0.093209 | 0.213504 | 0.347256 |
| SH3BP1   | 0.106641 | 0.554951 | 0.371671 |
| RAP2C    | 0.314456 | 0.627897 | 0.612305 |
| CBY1     | 0.563678 | -0.2148  | 0.789479 |
| STARD13  | 0.037979 | 0.878932 | 0.233324 |
| RHBDD3   | 0.070222 | 1.235436 | 0.309184 |
| SIT1     | 0.050503 | 0.989007 | 0.263221 |
| RABGAP1  | 0.161013 | 0.269055 | 0.453012 |
| NAALAD2  | 0.341849 | -0.43969 | 0.629182 |
| TMED3    | 0.002963 | 0.693045 | 0.062294 |
| TSC22D4  | 0.541731 | 0.422677 | 0.775521 |
| DOPEY2   | 0.269226 | 0.338583 | 0.571371 |
| ZNF330   | 0.399927 | 0.692367 | 0.67622  |
| R3HCC1   | 0.026542 | 1.219631 | 0.196381 |
| NOC2L    | 0.850885 | 0.249708 | 0.944945 |
| RPL36    | 0.595428 | 0.106195 | 0.806337 |
| CCDC9    | 0.038337 | 0.709343 | 0.234656 |
| CHTOP    | 0.997369 | -0.03414 | 1        |
| SAMHD1   | 0.007779 | 0.322329 | 0.105988 |
| FAM32A   | 0.473815 | 0.385142 | 0.727018 |
| C2CD2    | 0.774093 | -0.02617 | 0.903913 |
| PKP3     | 0.430555 | 0.065089 | 0.695651 |
| KNSTRN   | 0.672064 | 0.17963  | 0.851286 |
| HBS1L    | 0.014268 | 0.500805 | 0.145444 |
| SALL2    | 0.923017 | -0.03429 | 0.980751 |
| PRKAB1   | 0.581788 | 0.041783 | 0.797998 |
| MTF2     | 0.974393 | 0.015779 | 0.998921 |
| WDR45    | 0.582909 | 0.423264 | 0.799042 |
| DMXL1    | 0.095123 | 0.627608 | 0.35136  |
| ATP6V0A2 | 0.024495 | 0.486708 | 0.189451 |
| TLN1     | 0.044589 | 0.152947 | 0.24851  |
| KIF3A    | 0.180046 | 0.640589 | 0.472077 |
| JRKL     | 0.040567 | 0.660784 | 0.240216 |
| TRRAP    | 0.083367 | 0.428085 | 0.332962 |
| RAD54L2  | 0.407428 | -0.29934 | 0.680612 |

|          |          |          |          |
|----------|----------|----------|----------|
| MTCL1    | 0.07345  | 0.587341 | 0.316346 |
| VPRBP    | 0.490635 | 0.098527 | 0.738656 |
| KDM3A    | 0.195954 | 0.594104 | 0.490309 |
| TCAF1    | 0.074227 | 0.676042 | 0.317894 |
| CHST2    | 0.115283 | 0.503385 | 0.387731 |
| RBM19    | 0.351444 | 0.444094 | 0.636424 |
| DAAM1    | 0.432479 | 0.323415 | 0.697404 |
| PLXND1   | 0.175247 | 0.480494 | 0.466796 |
| HECTD4   | 0.981553 | 0.256602 | 1        |
| FAM21C   | 0.004707 | 0.504463 | 0.079703 |
| ZNF451   | 0.013882 | 1.302736 | 0.144006 |
| WDR7     | 0.019715 | 0.332754 | 0.1684   |
| USP15    | 0.177368 | 0.303556 | 0.468602 |
| FARP1    | 0.199513 | 0.180674 | 0.49217  |
| KIAA0430 | 0.015033 | 1.084107 | 0.150049 |
| CEP170B  | 0.160465 | 0.803108 | 0.453012 |
| FAM65B   | 0.622203 | 0.043416 | 0.825978 |
| PLEKHM1  | 0.12241  | 0.461642 | 0.398323 |
| TLN2     | 0.001187 | 0.755294 | 0.03367  |
| RAPGEF2  | 0.439669 | -0.61551 | 0.70314  |
| IRS2     | 0.171326 | 0.711747 | 0.462219 |
| GPSM3    | 0.559364 | -0.3984  | 0.78633  |
| MYO5A    | 0.003093 | 0.535773 | 0.063058 |
| DTNA     | 0.030755 | -0.43556 | 0.211475 |
| LOXL2    | 6.57E-05 | 2.832314 | 0.004554 |
| AIM1     | 0.590866 | 0.066032 | 0.804875 |
| TRAF6    | 0.292737 | 0.680606 | 0.595788 |
| MAP4K5   | 0.000162 | 1.553409 | 0.009119 |
| HYOU1    | 0.055344 | 0.221351 | 0.274516 |
| RNF115   | 0.175699 | 0.750446 | 0.467197 |
| ATG4B    | 0.44221  | 0.215586 | 0.703704 |
| TBL2     | 0.407778 | 0.124107 | 0.680612 |
| WIPI2    | 0.684947 | 0.223149 | 0.85709  |
| TELO2    | 0.006344 | 1.490652 | 0.094329 |
| MMACHC   | 0.995277 | -0.03718 | 1        |
| LAS1L    | 0.009626 | 0.517279 | 0.118893 |
| AFG3L2   | 0.809743 | 0.017713 | 0.921586 |
| AMMECR1  | 0.986749 | -0.03144 | 1        |
| ARIH1    | 0.026898 | 0.650743 | 0.198225 |
| LSM5     | 0.055343 | 1.068629 | 0.274516 |
| LSM4     | 0.192662 | -0.45876 | 0.486094 |
| RNF114   | 0.091926 | 0.540586 | 0.345626 |
| SAMM50   | 0.559385 | 0.103936 | 0.78633  |
| PRRC2C   | 0.00719  | 0.755135 | 0.101457 |
| OARD1    | 0.547275 | -0.20529 | 0.779573 |
| POLR3H   | 0.465993 | 0.590673 | 0.721065 |
| LRRC42   | 0.24809  | 0.675923 | 0.551415 |
| HSPB11   | 0.665519 | 0.593547 | 0.847351 |
| YIPF1    | 0.992006 | 0.17658  | 1        |
| PPME1    | 0.089414 | 0.479976 | 0.341477 |
| RIPK3    | 0.064259 | 0.967934 | 0.296208 |
| ASB3     | 0.24354  | 0.358365 | 0.547425 |
| ASB1     | 0.245238 | -0.28009 | 0.548928 |
| RBM7     | 0.37652  | -0.75196 | 0.658199 |
| TIMM22   | 0.225417 | 1.293772 | 0.52468  |
| AP4S1    | 0.040543 | 0.952867 | 0.240216 |
| CEP83    | 0.594139 | -0.22186 | 0.806337 |
| KCTD3    | 0.005738 | 1.10356  | 0.089283 |

|          |          |          |          |
|----------|----------|----------|----------|
| NUB1     | 0.470127 | 0.079155 | 0.72456  |
| YTHDF2   | 0.144006 | 0.291443 | 0.431666 |
| CTDP1    | 0.459489 | -0.12201 | 0.716966 |
| PAXBP1   | 0.252448 | 0.311576 | 0.555643 |
| NME7     | 0.001828 | 1.145587 | 0.044883 |
| SUPT16H  | 0.074384 | 0.303673 | 0.317894 |
| PCDHB2   | 0.384669 | 0.274547 | 0.66413  |
| PCDHGB7  | 0.079293 | 0.308786 | 0.32578  |
| PCDHGB2  | 0.229605 | 0.583779 | 0.529537 |
| PCDHGA2  | 0.331588 | -0.10306 | 0.619341 |
| PCDHA3   | 0.398667 | 0.302783 | 0.676088 |
| PCDHAC2  | 0.26324  | -0.29791 | 0.565873 |
| UTP18    | 0.204174 | 0.333541 | 0.497963 |
| PHLDA3   | 0.218277 | 0.886236 | 0.515816 |
| TIMM10B  | 0.176211 | -0.07837 | 0.468218 |
| TIMM9    | 0.581788 | 0.039945 | 0.797998 |
| TIMM8B   | 0.845683 | 0.022275 | 0.942239 |
| PCYT1B   | 0.690406 | 0.316784 | 0.85979  |
| UCHL5    | 0.255193 | 0.189555 | 0.557593 |
| CD2AP    | 0.646644 | 0.144445 | 0.837353 |
| ATP6V1D  | 0.71923  | -0.2385  | 0.874478 |
| TNPO3    | 0.078771 | 0.317855 | 0.32578  |
| HILPDA   | 0.322009 | 0.136722 | 0.613139 |
| ENTPD2   | 0.49063  | -0.19981 | 0.738656 |
| TIMM13   | 0.577274 | -0.15611 | 0.796634 |
| SRPRB    | 0.023873 | 0.319982 | 0.186463 |
| N6AMT1   | 0.451193 | 0.521989 | 0.711024 |
| COL4A3BP | 0.908103 | -0.00631 | 0.9734   |
| GMPPB    | 0.739057 | -0.00218 | 0.886253 |
| FADS3    | 0.739884 | -0.14977 | 0.886374 |
| MAFB     | 0.210922 | 0.704988 | 0.506632 |
| GTF3C5   | 0.04934  | 0.553325 | 0.260958 |
| GTF3C3   | 0.003027 | 0.729821 | 0.062294 |
| HEMK1    | 0.949005 | 0.066125 | 0.990863 |
| DMRT2    | 0.008326 | 1.192205 | 0.109932 |
| DMRT1    | 0.322009 | 0.142371 | 0.613139 |
| TRAPPC1  | 0.003899 | 1.262931 | 0.071121 |
| TRPV2    | 0.192667 | 0.213342 | 0.486094 |
| CDC42BPB | 0.007479 | 0.342679 | 0.10395  |
| RBM8A    | 0.568296 | 0.124587 | 0.791838 |
| DNAJC15  | 0.133765 | 0.477343 | 0.416228 |
| USP16    | 0.298784 | 0.592036 | 0.601676 |
| TSSC4    | 0.53908  | 0.690057 | 0.774975 |
| TNFRSF18 | 0.039604 | 0.839575 | 0.237431 |
| MPC1     | 0.653736 | 0.040901 | 0.841555 |
| IER3IP1  | 0.064284 | 0.621982 | 0.296208 |
| ZNF706   | 0.048893 | 1.784813 | 0.259694 |
| MAGED1   | 0.007538 | 1.618879 | 0.104632 |
| WIF1     | 0.175422 | -0.55645 | 0.466796 |
| SNX14    | 0.554066 | 0.009471 | 0.783439 |
| SNX13    | 0.918415 | -0.1108  | 0.978657 |
| SNX11    | 0.938369 | 0.013806 | 0.986498 |
| SNX9     | 1.07E-06 | 0.696277 | 0.000157 |
| SNX8     | 0.81486  | 0.097617 | 0.924847 |
| SNX5     | 0.779221 | 0.02664  | 0.906856 |
| LIPG     | 0.455572 | 0.20105  | 0.71417  |
| FLVCR1   | 0.99047  | 0.008238 | 1        |
| NUBP2    | 0.298858 | 0.199505 | 0.601676 |

|                 |          |          |          |
|-----------------|----------|----------|----------|
| PEX16           | 0.320366 | 0.738489 | 0.613139 |
| ST14            | 0.535225 | -0.37673 | 0.772552 |
| LYVE1           | 0.888841 | -0.02254 | 0.965603 |
| BACE2           | 0.595981 | 0.277815 | 0.806888 |
| HEBP2           | 0.466082 | -0.14537 | 0.721065 |
| HCFC2           | 0.035765 | 0.980711 | 0.225894 |
| UBIAD1          | 0.185033 | -1.08449 | 0.477255 |
| CSAD            | 0.169846 | -0.44855 | 0.461029 |
| MRFAP1          | 0.194427 | 1.22027  | 0.488911 |
| PUS1            | 0.354055 | 0.248998 | 0.638094 |
| LRRFIP2         | 0.231232 | -0.22904 | 0.531962 |
| FHOD1           | 0.660922 | -0.02956 | 0.844596 |
| IRAK3           | 0.451167 | 0.459631 | 0.711024 |
| PSAT1           | 0.052057 | 0.467678 | 0.267367 |
| NCOR2           | 7.46E-05 | 1.309521 | 0.004958 |
| SLC25A15        | 0.356681 | 0.958967 | 0.641472 |
| F11R            | 0.147661 | -0.3029  | 0.436386 |
| GPC6            | 2.01E-06 | 1.835928 | 0.00026  |
| NPTN            | 0.072266 | 0.254592 | 0.313701 |
| RFNG            | 0.870327 | -0.08675 | 0.956098 |
| CPQ             | 0.3985   | 0.282405 | 0.676012 |
| GPR56           | 0.005438 | 1.784832 | 0.086993 |
| SPIN1           | 0.017954 | 1.431325 | 0.162555 |
| KPTN            | 0.259612 | 0.685652 | 0.563057 |
| SLC12A7         | 0.680152 | 0.202067 | 0.85545  |
| ALG6            | 0.342193 | 0.336536 | 0.629606 |
| ALG5            | 0.71923  | 0.107311 | 0.874478 |
| MRPS18B         | 0.378519 | 0.018828 | 0.659304 |
| COPG1           | 0.053686 | 0.227529 | 0.271145 |
| AUP1            | 0.079333 | 0.486888 | 0.32578  |
| FKBP7           | 2.85E-05 | 1.122784 | 0.00221  |
| ARL5A           | 0.257625 | 0.824323 | 0.560462 |
| GMEB1           | 0.532637 | 0.416418 | 0.7709   |
| LHFP            | 0.430232 | -0.35177 | 0.695651 |
| CLIC4           | 6.32E-05 | 0.61939  | 0.004408 |
| NFS1            | 0.908103 | 0.030031 | 0.9734   |
| POMT1           | 0.122179 | 0.833719 | 0.397854 |
| CFAP20          | 0.011631 | 0.737506 | 0.129699 |
| TACC3           | 0.960097 | 0.188823 | 0.994122 |
| SPCS1           | 0.233812 | 0.287563 | 0.535403 |
| SAR1B           | 0.046732 | 0.301951 | 0.254194 |
| AP4B1           | 0.23586  | 0.625372 | 0.537858 |
| EMILIN1         | 0.00171  | 0.390191 | 0.043008 |
| MTCH2           | 0.845718 | 0.021314 | 0.942239 |
| SELK            | 0.144585 | -1.09996 | 0.433053 |
| ARFGEF2         | 0.199513 | 0.107707 | 0.49217  |
| ARFGEF1         | 0.324076 | 0.144707 | 0.614309 |
| MAD1L1          | 0.021897 | 0.424787 | 0.176756 |
| STK24           | 0.97106  | 0.020977 | 0.997592 |
| BZW2            | 0.228671 | 0.424    | 0.528484 |
| MRVI1           | 0.00069  | 1.996871 | 0.024536 |
| TMEM14A         | 0.322009 | 0.151524 | 0.613139 |
| MRPL42          | 0.050265 | 1.555475 | 0.263221 |
| COMMD10         | 0.668107 | -0.05254 | 0.849281 |
| DYNC1LI1        | 0.067188 | 0.18635  | 0.302058 |
| CHCHD2;CHCHD2P9 | 0.314461 | 0.061569 | 0.612305 |
| XRCC6BP1        | 0.451681 | -0.34549 | 0.711655 |
| EPN1            | 0.051278 | 0.270435 | 0.265139 |

|          |          |          |          |
|----------|----------|----------|----------|
| USP3     | 0.032487 | 1.275421 | 0.216666 |
| PXMP4    | 0.380902 | -0.24537 | 0.661698 |
| TEX264   | 0.486497 | 0.456175 | 0.73612  |
| CABIN1   | 0.174622 | -0.60357 | 0.466796 |
| TAF6L    | 0.246735 | 0.305366 | 0.549922 |
| CEPT1    | 0.187853 | 1.007807 | 0.480067 |
| DNMT3A   | 0.003626 | 1.762239 | 0.069037 |
| OAS3     | 0.419078 | 0.187583 | 0.688796 |
| IKBKG    | 0.550543 | 0.001667 | 0.781327 |
| IGF2BP2  | 0.109581 | 1.272107 | 0.377423 |
| CSNK1G3  | 0.194782 | 0.784836 | 0.488911 |
| SLC30A1  | 0.213733 | 0.301602 | 0.509228 |
| SLC4A7   | 0.009253 | 0.874122 | 0.116462 |
| NDUFB9   | 0.950035 | 0.002465 | 0.990863 |
| COX11    | 0.866222 | 0.040738 | 0.953042 |
| SQRDL    | 0.835403 | -0.11274 | 0.935999 |
| LAMC3    | 0.11228  | -0.93133 | 0.382523 |
| ROBO1    | 0.010119 | 1.267392 | 0.12173  |
| USH1C    | 0.995826 | -0.02851 | 1        |
| SESN1    | 0.77733  | -0.05    | 0.906372 |
| CAPN6    | 0.767026 | 0.026544 | 0.901915 |
| STON1    | 0.000639 | 1.887689 | 0.023555 |
| AP1M2    | 0.595424 | 0.080158 | 0.806337 |
| NCOA3    | 0.1891   | 0.58134  | 0.481831 |
| NUMBL    | 0.403768 | 0.905146 | 0.678271 |
| SLC4A4   | 0.943096 | -0.29098 | 0.988547 |
| MAP3K4   | 0.041308 | 1.141851 | 0.240826 |
| FCGBP    | 0.254903 | 0.69517  | 0.557593 |
| CCDC61   | 0.064718 | -0.78078 | 0.297421 |
| SCIN     | 0.403897 | 0.879697 | 0.678271 |
| DDX49    | 0.663171 | -0.57252 | 0.846498 |
| CAPN7    | 0.104509 | 0.654106 | 0.368322 |
| WASF2    | 0.861239 | 0.055897 | 0.950165 |
| PIAS3    | 0.060265 | 0.925674 | 0.287134 |
| MAU2     | 0.131524 | 0.54542  | 0.413476 |
| FAM169A  | 0.461959 | 0.175791 | 0.718747 |
| ENPP4    | 0.774166 | -0.10887 | 0.903913 |
| ZHX2     | 0.794829 | 0.00715  | 0.913708 |
| MORC2    | 0.627036 | 0.261988 | 0.828932 |
| IVNS1ABP | 0.581411 | 0.57015  | 0.797998 |
| SEC23IP  | 0.78936  | 0.014393 | 0.911483 |
| LY96     | 0.843352 | 0.049204 | 0.941517 |
